# Supplementary material
Source: publisher figshare collection journal article supplement (https://gsajournals.figshare.com/ndownloader/files/15347555)
Supplement: Supplementary file 1 [file 15347555]

			rs#	alleles	nr call variants	chrom	pos	strand	aeth_2	aeth_1	aeth_12	aeth_15	aeth_17	aeth_6	aeth_16	aeth_19	aeth_CYP-1	aeth_119	aeth_11	aeth_118	aeth_117	aeth_10	aeth_238	aeth_116	aeth_237	aeth_115	aeth_235	aeth_234	aeth_113	aeth_112	aeth_233	aeth_111	aeth_232	aeth_231	aeth_110	aeth_230	aeth_9	aeth_8	aeth_109	aeth_108	aeth_229	aeth_228	aeth_106	aeth_227	aeth_226	aeth_105	aeth_225	aeth_103	aeth_223
1	1	M1	SCSC-10_GI_10_9	A/T	3	CSC-10_GI_10	91848	+	N	A	N	A	T	A	A	N	A	A	T	N	A	N	N	A	T	N	A	T	A	T	A	A	N	T	N	T	N	T	A	T	N	A	T	A	T	A	T	T	A
2	2	M2	SCSC-10_GI_10_1	T/C	3	CSC-10_GI_10	104497	+	N	T	T	T	C	T	T	N	T	T	C	N	T	N	N	T	C	N	T	C	T	C	T	T	N	C	N	C	N	C	T	C	N	T	C	T	C	T	C	C	T
3	3	M3	SCSC-10_GI_10_1	T/C	3	CSC-10_GI_10	104685	+	N	T	N	T	C	T	T	N	T	T	C	N	T	N	N	T	C	N	T	C	T	C	T	T	C	C	N	C	N	C	T	C	N	T	C	T	C	T	C	C	T
4	4	M4	SCSC-10_GI_10_1	T/C	3	CSC-10_GI_10	104728	+	N	T	N	T	C	T	T	N	T	T	C	N	T	N	N	T	C	N	T	C	T	C	T	T	C	C	N	C	N	C	T	C	N	T	C	T	C	T	C	C	T
5	5	M5	SCSC-10_GI_10_1	G/A	3	CSC-10_GI_10	105272	+	N	G	N	G	A	G	G	N	G	G	A	N	G	N	N	G	A	N	G	A	G	A	G	G	A	A	N	A	N	A	G	A	N	G	A	G	A	G	A	A	G
6	6	M6	SCSC-10_GI_10_1	A/G	3	CSC-10_GI_10	105281	+	N	A	N	A	G	A	A	N	A	A	G	N	A	N	N	A	G	N	A	G	A	G	A	A	G	G	N	G	N	G	A	G	N	A	G	A	G	A	G	G	A
7	7	M7	SCSC-10_GI_10_1	T/C	3	CSC-10_GI_10	136536	+	T	T	N	T	C	T	T	N	T	T	C	N	T	N	N	T	C	N	T	C	T	C	T	T	C	C	N	C	N	C	T	C	N	T	C	T	C	T	C	C	T
8	8	M8	SCSC-10_GI_10_1	G/A	3	CSC-10_GI_10	156063	+	G	G	N	G	A	G	G	N	G	G	A	N	G	N	N	G	A	N	G	A	G	A	G	G	A	A	N	A	N	A	G	A	N	G	A	G	A	G	A	A	G
9	9	M9	SCSC-10_GI_10_1	T/A	3	CSC-10_GI_10	166577	+	N	T	N	T	A	T	T	N	T	T	A	N	T	N	N	T	A	N	T	A	T	A	T	T	N	A	N	A	N	A	T	A	N	T	A	T	A	T	A	A	T
10	10	M10	SCSC-10_GI_10_1	A/T	3	CSC-10_GI_10	166578	+	N	A	N	A	T	A	A	N	A	A	T	N	A	N	N	A	T	N	A	T	A	T	A	A	N	T	N	T	N	T	A	T	N	A	T	A	T	A	T	T	A
11	11	M11	SCSC-10_GI_10_1	A/C	3	CSC-10_GI_10	166585	+	N	A	N	A	C	A	A	N	A	A	C	N	A	N	N	A	C	N	A	C	A	C	A	A	N	C	N	C	N	C	A	C	N	A	C	A	C	A	C	C	A
12	12	M12	SCSC-10_GI_10_1	C/T	3	CSC-10_GI_10	166588	+	N	C	N	C	T	C	C	N	C	C	T	N	C	N	N	C	T	N	C	T	C	T	C	C	N	T	N	T	N	T	C	T	N	C	T	C	T	C	T	T	C
13	13	M13	SCSC-10_GI_10_1	A/G	3	CSC-10_GI_10	170483	+	N	A	N	A	G	A	A	N	A	A	G	N	A	N	N	A	G	N	A	G	A	G	A	A	G	G	N	G	N	G	A	G	N	A	G	A	G	A	G	G	A
14	14	M14	SCSC-10_GI_10_1	T/C	3	CSC-10_GI_10	170574	+	N	T	N	T	C	T	T	N	T	T	C	N	T	N	N	T	C	N	T	C	T	C	T	T	N	C	N	C	N	C	T	C	N	T	C	T	C	T	C	C	T
15	15	M15	SCSC-10_GI_10_1	A/G	3	CSC-10_GI_10	172500	+	N	G	N	G	A	G	G	N	G	G	A	N	G	N	N	G	A	N	G	A	G	A	N	G	A	A	N	A	N	A	N	A	N	N	A	G	A	G	A	A	G
16	16	M16	SCSC-10_GI_10_1	C/G	3	CSC-10_GI_10	193843	+	C	C	N	C	G	C	C	N	C	G	G	N	C	N	N	C	G	N	C	G	C	G	C	C	G	G	N	G	N	G	C	G	N	C	G	C	G	C	G	G	C
17	17	M17	SCSC-10_GI_10_1	C/G	3	CSC-10_GI_10	193864	+	C	C	N	C	G	C	C	N	C	G	G	N	C	N	N	C	G	N	C	G	C	G	C	C	G	G	N	G	N	G	C	G	N	C	G	C	G	C	G	G	C
22	22	M22	SCSC-10_GI_10_3	G/A	3	CSC-10_GI_10	309768	+	N	G	N	G	A	G	G	N	G	A	A	N	G	N	N	G	A	N	G	A	G	A	G	G	A	A	N	A	N	A	G	A	N	G	A	G	A	G	A	A	G
23	23	M23	SCSC-10_GI_10_3	G/T	3	CSC-10_GI_10	357505	+	N	T	N	G	T	G	G	N	G	T	T	N	G	N	N	G	T	N	G	T	G	T	G	G	N	T	N	G	N	T	G	T	N	G	T	G	T	G	T	T	G
24	24	M24	SCSC-10_GI_10_3	T/A	3	CSC-10_GI_10	357520	+	N	A	N	T	A	T	T	N	T	A	A	N	T	N	N	T	A	N	T	A	T	A	T	T	N	A	N	T	N	A	T	A	N	T	A	T	A	T	A	A	T
25	25	M25	SCSC-10_GI_10_3	C/A	3	CSC-10_GI_10	367243	+	N	A	N	C	A	C	C	N	C	A	A	N	C	N	N	C	A	N	C	A	C	A	C	C	A	A	N	C	N	A	C	A	N	C	A	C	A	C	A	A	C
26	26	M26	SCSC-10_GI_10_3	G/A	3	CSC-10_GI_10	389193	+	N	A	N	G	A	G	G	N	G	A	A	N	G	N	N	G	A	N	G	A	G	A	G	G	A	A	N	G	N	A	G	A	N	G	A	G	A	G	A	A	G
27	27	M27	SCSC-10_GI_10_3	T/G	3	CSC-10_GI_10	397315	+	N	G	N	T	G	T	T	N	T	G	G	N	T	N	N	T	G	N	T	G	T	G	T	T	G	G	N	T	N	G	T	G	N	T	G	T	G	T	G	G	T
28	28	M28	SCSC-10_GI_10_3	T/C	3	CSC-10_GI_10	397316	+	N	C	N	T	C	T	T	N	T	C	C	N	T	N	N	T	C	N	T	C	T	C	T	T	C	C	N	T	N	C	T	C	N	T	C	T	C	T	C	C	T
29	29	M29	SCSC-10_GI_10_4	T/G	3	CSC-10_GI_10	450231	+	N	G	N	T	G	G	T	N	T	G	G	N	T	N	N	T	G	N	T	G	T	G	T	T	N	G	N	T	N	G	T	G	N	T	G	T	G	T	G	G	T
30	30	M30	SCSC-10_GI_10_4	G/T	3	CSC-10_GI_10	450234	+	N	T	N	G	T	T	G	N	G	T	T	N	G	N	N	G	T	N	G	T	G	T	G	G	N	T	N	G	N	T	G	T	N	G	T	G	T	G	T	T	G
31	31	M31	SCSC-10_GI_10_4	A/T	3	CSC-10_GI_10	452476	+	N	T	N	A	T	T	A	N	A	T	T	N	A	N	N	A	T	N	A	T	A	T	A	A	A	T	N	A	N	T	A	T	N	A	T	A	T	A	T	T	A
32	32	M32	SCSC-10_GI_10_4	A/G	3	CSC-10_GI_10	475839	+	N	G	N	A	G	G	A	N	A	G	G	N	A	N	N	A	G	N	A	G	A	G	A	A	A	G	N	A	N	G	A	G	N	A	G	A	G	A	G	G	A
33	33	M33	SCSC-10_GI_10_5	T/A	3	CSC-10_GI_10	524554	+	N	T	N	A	T	T	A	N	A	T	T	N	A	N	N	A	T	N	A	T	A	T	A	A	A	T	N	A	N	T	A	T	N	A	T	A	T	A	T	T	A
34	34	M34	SCSC-10_GI_10_5	G/A	3	CSC-10_GI_10	534360	+	N	G	N	A	G	G	A	N	A	G	G	N	A	N	N	A	G	N	A	G	A	G	A	A	N	G	N	A	N	G	A	G	N	A	G	A	G	A	G	G	A
35	35	M35	SCSC-10_GI_10_5	C/A	3	CSC-10_GI_10	534392	+	N	C	N	A	C	C	A	N	A	C	C	N	A	N	N	A	C	N	A	C	A	C	A	A	N	C	N	A	N	C	A	C	N	A	C	A	C	A	C	C	A
36	36	M36	SCSC-10_GI_10_5	A/G	3	CSC-10_GI_10	534396	+	N	A	N	G	A	A	G	N	G	A	A	N	G	N	N	G	A	N	G	A	G	A	G	G	N	A	N	G	N	A	G	A	N	G	A	G	A	G	A	A	G
37	37	M37	SCSC-10_GI_10_5	A/T	3	CSC-10_GI_10	534825	+	N	A	N	T	A	A	T	N	T	A	A	N	T	N	N	T	A	N	T	A	T	A	T	T	N	A	N	T	N	A	T	A	N	T	A	T	A	T	A	A	T
38	38	M38	SCSC-10_GI_10_5	G/A	3	CSC-10_GI_10	534891	+	N	G	N	A	G	G	A	N	A	G	G	N	A	N	N	A	G	N	A	G	A	G	A	A	N	G	N	A	N	G	A	G	N	A	G	A	G	A	G	G	A
39	39	M39	SCSC-10_GI_10_5	C/T	3	CSC-10_GI_10	538169	+	N	C	N	T	C	C	T	N	T	C	C	N	T	N	N	T	C	N	T	C	T	C	T	T	T	C	N	T	N	C	T	C	N	T	C	T	C	T	C	C	T
40	40	M40	SCSC-10_GI_10_5	C/T	3	CSC-10_GI_10	538183	+	N	T	N	C	T	T	C	N	C	T	T	N	C	N	N	C	T	N	C	T	C	T	C	C	C	T	N	C	N	T	C	T	N	C	T	C	T	C	T	T	C
41	41	M41	SCSC-10_GI_10_5	T/C	3	CSC-10_GI_10	538184	+	N	C	N	T	C	C	T	N	T	C	C	N	T	N	N	T	C	N	T	C	T	C	T	T	T	C	N	T	N	C	T	C	N	T	C	T	C	T	C	C	T
42	42	M42	SCSC-10_GI_10_5	T/A	3	CSC-10_GI_10	538208	+	N	A	N	T	A	A	T	N	T	A	A	N	T	N	N	T	A	N	T	A	T	A	T	T	T	A	N	T	N	A	T	A	N	T	A	T	A	T	A	A	T
44	44	M44	SCSC-10_GI_10_5	C/T	3	CSC-10_GI_10	543037	+	N	C	N	T	C	C	T	N	T	C	C	N	T	N	N	T	C	N	T	C	T	C	T	T	T	C	N	T	N	C	T	C	N	T	C	T	C	T	C	C	T
45	45	M45	SCSC-10_GI_10_5	C/T	3	CSC-10_GI_10	547659	+	N	T	N	C	T	T	C	N	C	T	T	N	C	N	N	C	T	N	C	T	C	T	C	C	N	T	N	C	N	T	C	T	N	C	T	C	T	C	T	T	C
46	46	M46	SCSC-10_GI_10_5	A/G	3	CSC-10_GI_10	547708	+	N	G	N	A	G	G	A	N	A	G	G	N	A	N	N	A	G	N	A	G	A	G	A	A	A	G	N	A	N	G	A	G	N	A	G	A	G	A	G	G	A
47	47	M47	SCSC-10_GI_10_5	A/G	3	CSC-10_GI_10	547715	+	N	A	N	G	A	A	G	N	G	A	A	N	G	N	N	G	A	N	G	A	G	A	G	G	G	A	N	G	N	A	G	A	N	G	A	G	A	G	A	A	G
48	48	M48	SCSC-10_GI_10_5	T/C	3	CSC-10_GI_10	585075	+	N	T	N	C	T	T	C	N	C	T	T	N	C	N	N	C	T	N	C	T	C	T	C	C	C	T	N	C	N	T	C	T	N	C	T	C	T	C	T	T	T
49	49	M49	SCSC-10_GI_10_5	A/G	3	CSC-10_GI_10	585099	+	N	A	N	G	A	A	G	N	G	A	A	N	G	N	N	G	A	N	G	A	G	A	G	G	G	A	N	G	N	A	G	A	N	G	A	G	A	G	A	A	A
50	50	M50	SCSC-10_GI_10_6	T/C	3	CSC-10_GI_10	624542	+	N	T	N	C	T	T	C	N	C	T	T	N	C	T	N	C	T	N	C	T	C	T	C	C	N	T	N	C	N	T	C	Y	N	C	T	C	T	C	T	T	T
51	51	M51	SCSC-10_GI_10_6	G/A	3	CSC-10_GI_10	625919	+	N	G	N	A	G	G	A	N	A	G	G	N	A	N	N	A	G	N	A	G	A	G	A	A	N	G	N	A	N	G	A	R	N	A	G	A	G	A	G	G	G
52	52	M52	SCSC-10_GI_10_6	C/G	3	CSC-10_GI_10	657974	+	N	C	N	G	C	C	G	N	G	C	C	N	G	N	N	G	C	N	G	C	G	C	G	G	N	C	N	G	N	C	G	S	N	G	C	G	C	G	C	C	C
53	53	M53	SCSC-10_GI_10_6	A/G	3	CSC-10_GI_10	657996	+	N	A	N	G	A	A	G	N	G	A	A	N	G	N	N	G	A	N	G	A	G	A	G	G	N	A	N	G	N	A	G	R	N	G	A	G	A	G	A	A	A
54	54	M54	SCSC-10_GI_10_6	A/C	3	CSC-10_GI_10	668127	+	A	C	N	A	C	C	A	N	A	C	C	N	A	N	N	A	C	N	A	C	A	C	A	A	A	C	N	A	N	C	A	M	N	A	C	A	C	A	C	C	C
55	55	M55	SCSC-10_GI_10_6	C/T	3	CSC-10_GI_10	693717	+	N	C	N	T	C	C	T	N	T	C	C	N	T	N	N	T	C	N	T	C	T	C	T	T	N	C	N	T	N	C	T	Y	N	T	C	T	C	T	C	C	C
56	56	M56	SCSC-10_GI_10_6	G/A	3	CSC-10_GI_10	693726	+	N	G	N	A	G	G	A	N	A	G	G	N	A	N	N	A	G	N	A	G	A	G	A	A	N	G	N	A	N	G	A	R	N	A	G	A	G	A	G	G	G
57	57	M57	SCSC-10_GI_10_6	G/A	3	CSC-10_GI_10	694868	+	N	G	N	A	G	G	A	N	A	G	G	N	A	N	N	A	G	N	A	G	A	G	A	A	N	G	N	A	N	G	A	R	N	A	G	A	G	A	G	G	G
58	58	M58	SCSC-10_GI_10_6	A/G	3	CSC-10_GI_10	694926	+	N	A	N	G	A	A	G	N	G	A	A	N	G	N	N	G	A	N	G	A	G	A	G	G	G	A	N	G	N	A	G	R	N	G	A	G	A	G	A	A	A
59	59	M59	SCSC-10_GI_10_7	A/T	3	CSC-10_GI_10	724520	+	A	T	N	A	T	T	A	N	A	T	T	N	A	N	N	A	T	N	A	A	A	T	A	A	N	T	N	A	N	T	A	W	N	A	T	A	T	A	T	T	T
60	60	M60	SCSC-10_GI_10_7	C/T	3	CSC-10_GI_10	765358	+	N	T	N	C	T	T	C	N	C	T	T	N	C	N	N	C	T	N	C	C	C	T	C	C	N	T	N	C	N	T	C	Y	N	C	T	C	T	C	T	T	T
61	61	M61	SCSC-10_GI_10_7	A/G	3	CSC-10_GI_10	765449	+	A	G	N	A	G	G	A	N	A	G	G	N	A	N	N	A	G	N	A	A	A	G	A	A	N	G	N	A	N	G	A	R	N	A	G	A	G	A	G	G	G
62	62	M62	SCSC-10_GI_10_7	C/G	3	CSC-10_GI_10	765473	+	C	G	N	C	G	G	C	N	C	G	G	N	C	N	N	C	G	N	C	C	C	G	C	C	N	G	N	C	N	G	C	S	N	C	G	C	G	C	G	G	G
63	63	M63	SCSC-10_GI_10_9	G/A	3	CSC-10_GI_10	942331	+	A	G	N	A	G	G	G	N	A	G	G	N	A	N	N	A	G	N	G	A	A	A	A	G	G	G	N	A	N	G	A	R	N	A	G	G	G	A	G	G	G
64	64	M64	SCSC-10_GI_10_9	A/G	3	CSC-10_GI_10	942342	+	G	A	N	G	A	A	A	N	G	A	A	N	G	N	N	G	A	N	A	G	G	G	G	A	A	A	N	G	N	A	G	R	N	G	A	A	A	G	A	A	A
65	65	M65	SCSC-10_GI_10_9	A/G	3	CSC-10_GI_10	942349	+	G	A	N	G	A	A	A	N	G	A	A	N	G	N	N	G	A	N	A	G	G	G	G	A	A	A	N	G	N	A	G	R	N	G	A	A	A	G	A	A	A
66	66	M66	SCSC-10_GI_10_9	A/G	3	CSC-10_GI_10	942358	+	G	A	N	G	A	A	A	N	G	A	A	N	G	N	N	G	A	N	A	G	G	G	G	A	A	A	N	G	N	A	G	R	N	G	A	A	A	G	A	A	A
67	67	M67	SCSC-10_GI_10_9	T/C	3	CSC-10_GI_10	942499	+	N	T	C	C	T	T	T	N	C	T	T	N	C	N	N	C	Y	N	T	C	C	C	C	T	N	T	N	C	N	T	C	Y	N	C	T	T	T	C	T	T	T
68	68	M68	SCSC-10_GI_10_9	G/A	3	CSC-10_GI_10	942532	+	N	G	A	A	G	G	G	N	A	G	G	N	A	N	N	A	R	N	G	A	A	A	A	G	N	G	N	A	N	G	A	R	N	A	G	G	G	A	G	G	G
69	69	M69	SCSC-10_GI_10_9	A/T	3	CSC-10_GI_10	942547	+	N	A	T	T	A	A	A	N	T	A	A	N	T	N	N	T	W	N	A	T	T	T	T	A	N	A	N	T	N	A	T	W	N	T	A	A	A	T	A	A	A
70	70	M70	SCSC-10_GI_10_9	A/T	3	CSC-10_GI_10	947493	+	T	A	N	T	A	A	A	N	T	A	A	N	T	N	N	T	A	N	A	T	T	T	T	A	A	A	N	T	N	A	T	T	N	T	A	A	A	T	A	A	A
71	71	M71	SCSC-10_GI_10_9	T/G	3	CSC-10_GI_10	947511	+	G	T	N	G	T	T	T	N	G	T	T	N	G	N	N	G	T	N	T	G	G	G	G	T	T	T	N	G	N	T	G	G	N	G	T	T	T	G	T	T	T
72	72	M72	SCSC-10_GI_10_9	T/G	3	CSC-10_GI_10	947586	+	N	T	N	G	T	T	T	N	G	T	T	N	G	N	N	G	T	N	T	G	G	G	G	T	N	T	N	G	N	T	G	G	N	G	T	T	T	G	T	T	T
73	73	M73	SCSC-10_GI_10_9	G/A	3	CSC-10_GI_10	947601	+	N	G	N	A	G	G	G	N	A	G	G	N	A	N	N	A	G	N	G	A	A	A	A	G	N	G	N	A	N	G	A	A	N	A	G	G	G	A	G	G	G
74	74	M74	SCSC-10_GI_10_9	G/C	3	CSC-10_GI_10	947613	+	N	G	N	C	G	G	G	N	C	G	G	N	C	N	N	C	G	N	G	C	C	C	C	G	N	G	N	C	N	G	C	C	N	C	G	G	G	C	G	G	G
75	75	M75	SCSC-10_GI_10_9	A/G	3	CSC-10_GI_10	947826	+	N	A	N	G	A	A	A	N	G	A	A	N	G	N	N	G	A	N	A	G	G	G	G	A	A	A	N	G	N	A	G	G	N	G	A	A	A	G	A	A	A
76	76	M76	SCSC-10_GI_10_9	G/A	3	CSC-10_GI_10	947835	+	N	G	N	A	G	G	G	N	A	G	G	N	A	N	N	A	G	N	G	A	A	A	A	G	G	G	N	A	N	G	A	A	N	A	G	G	G	A	G	G	G
77	77	M77	SCSC-10_GI_10_9	C/A	3	CSC-10_GI_10	949237	+	N	C	N	A	C	C	C	N	A	C	C	N	A	N	N	A	C	N	C	A	A	A	A	C	C	C	N	A	N	C	A	A	N	A	C	C	C	A	C	C	C
78	78	M78	SCSC-10_GI_10_9	G/T	3	CSC-10_GI_10	949241	+	N	G	N	T	G	G	G	N	T	G	G	N	T	N	N	T	G	N	G	T	T	T	T	G	G	G	N	T	N	G	T	T	N	T	G	G	G	T	G	G	G
79	79	M79	SCSC-10_GI_10_9	T/C	3	CSC-10_GI_10	949696	+	N	T	N	C	T	T	T	N	C	T	T	N	C	N	N	C	T	N	T	C	C	C	C	T	T	T	N	C	N	T	C	C	N	C	T	T	T	C	T	T	T
80	80	M80	SCSC-10_GI_10_9	C/T	3	CSC-10_GI_10	953136	+	N	C	N	T	C	C	C	N	T	C	C	N	T	N	N	T	C	N	C	T	T	T	T	C	C	C	N	T	N	C	T	T	N	T	C	C	C	T	C	C	C
81	81	M81	SCSC-10_GI_10_1	T/C	3	CSC-10_GI_10	1004380	+	N	T	N	C	T	T	T	N	C	T	T	N	C	N	N	C	T	N	T	C	C	C	C	T	C	T	N	C	N	T	C	C	N	C	T	T	T	C	T	T	T
82	82	M82	SCSC-10_GI_10_1	C/T	3	CSC-10_GI_10	1004390	+	N	C	N	T	C	C	C	N	T	C	C	N	T	N	N	T	C	N	C	T	T	T	T	C	T	C	N	T	N	C	T	T	N	T	C	C	C	T	C	C	C
83	83	M83	SCSC-10_GI_10_1	G/A	3	CSC-10_GI_10	1004412	+	N	G	N	A	G	G	G	N	A	G	G	N	A	N	N	A	G	N	G	A	A	A	A	G	A	G	N	A	N	G	A	A	N	A	G	G	G	A	G	G	G
84	84	M84	SCSC-10_GI_10_1	C/T	3	CSC-10_GI_10	1004430	+	N	C	N	T	C	C	C	N	T	C	C	N	T	N	N	T	C	N	C	T	T	T	T	C	T	C	N	T	N	C	T	T	N	T	C	C	C	T	C	C	C
85	85	M85	SCSC-10_GI_10_1	G/T	3	CSC-10_GI_10	1014402	+	N	G	N	T	G	G	G	N	T	G	G	N	T	N	N	T	G	N	G	T	T	T	T	G	N	G	N	T	N	G	T	T	N	T	G	G	G	T	G	G	G
86	86	M86	SCSC-10_GI_10_1	C/A	3	CSC-10_GI_10	1014403	+	N	C	N	A	C	C	C	N	A	C	C	N	A	N	N	A	C	N	C	A	A	A	A	C	N	C	N	A	N	C	A	A	N	A	C	C	C	A	C	C	C
87	87	M87	SCSC-10_GI_10_1	A/G	3	CSC-10_GI_10	1014405	+	N	A	N	G	A	A	A	N	G	A	A	N	G	N	N	G	A	N	A	G	G	G	G	A	N	A	N	G	N	A	G	G	N	G	A	A	A	G	A	A	A
88	88	M88	SCSC-10_GI_10_1	A/T	3	CSC-10_GI_10	1014406	+	N	A	N	T	A	A	A	N	T	A	A	N	T	N	N	T	A	N	A	T	T	T	T	A	N	A	N	T	N	A	T	T	N	T	A	A	A	T	A	A	A
89	89	M89	SCSC-10_GI_10_1	A/T	3	CSC-10_GI_10	1015412	+	N	A	N	T	A	A	A	N	T	A	A	N	T	N	N	T	A	N	A	T	T	T	T	A	N	A	N	T	N	A	T	T	N	T	A	A	A	T	A	A	A
90	90	M90	SCSC-10_GI_10_1	A/C	3	CSC-10_GI_10	1053706	+	N	A	N	C	A	A	A	N	C	A	A	N	C	N	N	C	A	N	A	C	C	C	C	A	N	A	N	C	N	A	C	C	N	C	A	A	A	C	A	A	A
91	91	M91	SCSC-10_GI_10_1	G/C	3	CSC-10_GI_10	1053738	+	N	G	N	C	G	G	G	N	C	G	G	N	C	N	N	C	G	N	G	C	C	C	C	G	N	G	N	C	N	G	C	C	N	C	G	G	G	C	G	G	G
92	92	M92	SCSC-10_GI_10_1	A/T	3	CSC-10_GI_10	1071922	+	N	A	N	T	A	A	A	N	T	A	A	N	T	N	N	T	A	N	A	T	T	T	T	A	N	A	N	T	N	A	T	T	N	T	A	A	A	T	A	A	A
93	93	M93	SCSC-10_GI_10_1	G/A	3	CSC-10_GI_10	1071930	+	N	G	N	A	G	G	G	N	A	G	G	N	A	N	N	A	G	N	G	A	A	A	A	G	N	G	N	A	N	G	A	A	N	A	G	G	G	A	G	G	G
94	94	M94	SCSC-10_GI_10_1	C/G	3	CSC-10_GI_10	1071937	+	N	C	N	G	C	C	C	N	G	C	C	N	G	N	N	G	C	N	C	G	G	G	G	C	N	C	N	G	N	C	G	G	N	G	C	C	C	G	C	C	C
95	95	M95	SCSC-10_GI_10_1	A/G	3	CSC-10_GI_10	1071999	+	N	A	N	G	A	A	A	N	G	A	A	N	G	N	N	G	A	N	A	G	G	G	G	A	G	A	N	G	N	A	G	G	N	G	A	A	A	G	A	A	A
96	96	M96	SCSC-10_GI_10_1	T/C	3	CSC-10_GI_10	1072014	+	N	T	N	C	T	T	T	N	C	T	T	N	C	N	N	C	T	N	T	C	C	C	C	T	C	T	N	C	N	T	C	C	N	C	T	T	T	C	T	T	T
97	97	M97	SCSC-10_GI_10_1	T/G	3	CSC-10_GI_10	1162269	+	N	T	N	G	T	T	T	N	G	T	T	N	G	N	N	G	T	N	T	G	G	G	G	T	G	T	N	G	N	T	G	G	N	G	T	T	T	G	T	T	T
98	98	M98	SCSC-10_GI_10_1	T/A	3	CSC-10_GI_10	1162270	+	N	T	N	A	T	T	T	N	A	T	T	N	A	N	N	A	T	N	T	A	A	A	A	T	A	T	N	A	N	T	A	A	N	A	T	T	T	A	T	T	T
99	99	M99	SCSC-10_GI_10_1	A/G	3	CSC-10_GI_10	1169683	+	N	A	N	G	A	A	A	N	G	A	A	N	G	A	N	G	A	N	A	G	G	G	G	A	N	A	N	G	N	A	G	G	N	G	A	A	A	G	A	G	A
100	100	M100	SCSC-10_GI_10_1	T/G	3	CSC-10_GI_10	1403710	+	N	T	N	G	T	T	T	N	G	T	T	N	G	N	N	G	T	N	T	G	G	G	G	T	N	T	N	G	N	T	G	G	N	G	T	T	T	G	T	G	T
101	101	M101	SCSC-10_GI_10_1	T/C	3	CSC-10_GI_10	1444474	+	N	T	N	C	T	T	T	N	C	T	T	N	C	N	N	C	T	N	T	C	C	C	C	T	C	T	N	C	N	T	C	C	N	T	T	T	T	C	T	C	T
102	102	M102	SCSC-10_GI_10_1	G/A	3	CSC-10_GI_10	1445552	+	N	G	N	A	G	G	G	N	A	G	G	N	A	N	N	A	G	N	G	A	A	A	A	G	N	G	N	A	N	G	A	A	N	G	G	G	G	A	G	A	G
103	103	M103	SCSC-10_GI_10_1	G/A	3	CSC-10_GI_10	1445555	+	N	G	N	A	G	G	G	N	A	G	G	N	A	N	N	A	G	N	G	A	A	A	A	G	N	G	N	A	N	G	A	A	N	G	G	G	G	A	G	A	G
104	104	M104	SCSC-10_GI_10_1	T/A	3	CSC-10_GI_10	1445557	+	N	T	N	A	T	T	T	N	A	T	T	N	A	N	N	A	T	N	T	A	A	A	A	T	N	T	N	A	N	T	A	A	N	T	T	T	T	A	T	A	T
105	105	M105	SCSC-10_GI_10_1	T/A	3	CSC-10_GI_10	1445559	+	N	T	N	A	T	T	T	N	A	T	T	N	A	N	N	A	T	N	T	A	A	A	A	T	N	T	N	A	N	T	A	A	N	T	T	T	T	A	T	A	T
106	106	M106	SCSC-10_GI_10_1	A/C	3	CSC-10_GI_10	1446280	+	N	A	N	C	A	M	A	N	C	A	A	N	C	N	N	C	A	N	A	C	C	C	C	A	N	A	N	C	N	A	C	C	N	A	A	A	A	C	A	C	A
107	107	M107	SCSC-10_GI_10_1	C/T	3	CSC-10_GI_10	1468288	+	N	C	N	T	C	C	C	N	T	C	C	N	T	N	N	T	C	N	C	T	T	T	T	C	T	C	N	T	N	C	T	T	N	C	C	C	C	T	C	T	C
108	108	M108	SCSC-10_GI_10_1	A/T	3	CSC-10_GI_10	1487054	+	T	A	T	T	A	A	A	N	T	A	A	N	T	N	N	T	A	N	A	T	T	T	T	A	T	A	N	T	N	A	T	T	N	A	A	A	A	T	A	T	A
109	109	M109	SCSC-10_GI_10_1	T/G	3	CSC-10_GI_10	1487080	+	G	T	G	G	T	T	T	N	G	T	T	N	G	N	N	G	T	N	T	G	G	G	G	T	G	T	N	G	N	T	G	G	N	T	T	T	T	G	T	G	T
111	111	M111	SCSC-10_GI_10_1	A/G	3	CSC-10_GI_10	1502620	+	G	A	N	G	A	A	A	N	G	A	A	N	G	N	N	G	A	N	A	G	G	G	G	A	G	A	N	G	N	A	G	G	N	A	A	A	A	G	A	G	A
112	112	M112	SCSC-10_GI_10_1	C/A	3	CSC-10_GI_10	1502634	+	A	C	N	A	C	C	C	N	A	C	C	N	A	N	N	A	C	N	C	A	A	A	A	C	A	C	N	A	N	C	A	A	N	C	C	C	C	A	C	A	C
113	113	M113	SCSC-10_GI_10_1	G/A	3	CSC-10_GI_10	1502668	+	A	G	N	A	G	G	G	N	A	G	G	N	A	N	N	A	G	N	G	A	A	A	A	G	A	G	N	A	N	G	A	A	N	G	G	G	G	A	G	A	G
114	114	M114	SCSC-10_GI_10_1	C/G	3	CSC-10_GI_10	1506756	+	N	C	N	G	C	C	C	N	G	C	C	N	G	N	N	G	C	N	C	G	G	G	G	C	G	C	N	G	N	C	G	G	N	C	C	C	C	G	C	G	C
115	115	M115	SCSC-10_GI_10_1	T/C	3	CSC-10_GI_10	1506757	+	N	T	N	C	T	T	T	N	C	T	T	N	C	N	N	C	T	N	T	C	C	C	C	T	C	T	N	C	N	T	C	C	N	T	T	T	T	C	T	C	T
116	116	M116	SCSC-10_GI_10_1	G/T	3	CSC-10_GI_10	1506772	+	N	G	N	T	G	G	G	N	T	G	G	N	T	N	N	T	G	N	G	T	T	T	T	G	T	G	N	T	N	G	T	T	N	G	G	G	G	T	G	T	G
117	117	M117	SCSC-10_GI_10_1	G/A	3	CSC-10_GI_10	1506781	+	N	G	N	A	G	G	G	N	A	G	G	N	A	N	N	A	G	N	G	A	A	A	A	G	A	G	N	A	N	G	A	A	N	G	G	G	G	A	G	A	G
120	120	M120	SCSC-10_GI_10_1	A/G	3	CSC-10_GI_10	1518393	+	N	A	N	G	A	A	A	N	G	A	A	N	G	N	N	G	A	N	A	G	G	G	G	A	G	A	N	G	N	A	G	G	N	A	A	A	A	G	A	G	A
121	121	M121	SCSC-10_GI_10_1	C/T	3	CSC-10_GI_10	1553091	+	N	C	N	T	C	C	C	N	T	C	C	N	T	N	N	T	C	N	C	T	T	T	T	C	T	C	N	T	N	C	T	T	N	C	C	C	C	T	C	T	C
122	122	M122	SCSC-10_GI_10_1	A/C	3	CSC-10_GI_10	1553094	+	N	A	N	C	A	A	A	N	C	A	A	N	C	N	N	C	A	N	A	C	C	C	C	A	C	A	N	C	N	A	C	C	N	A	A	A	A	C	A	C	A
123	123	M123	SCSC-10_GI_10_1	C/T	3	CSC-10_GI_10	1560867	+	N	C	N	T	C	C	C	N	T	C	C	N	T	N	N	T	C	N	C	T	T	T	T	C	T	C	N	T	N	C	T	T	N	C	C	C	C	T	C	T	C
140	140	M140	SCSC-10_GI_10_1	C/T	3	CSC-10_GI_10	1676940	+	N	T	N	C	C	C	C	N	T	C	C	N	T	C	N	T	C	N	Y	T	T	T	T	C	T	T	N	T	N	C	T	T	N	C	C	C	C	T	C	T	C
141	141	M141	SCSC-10_GI_10_1	A/G	3	CSC-10_GI_10	1694726	+	N	G	G	A	A	A	A	N	G	A	A	N	G	N	N	G	A	N	R	G	G	G	G	A	G	G	N	G	N	A	G	G	N	A	A	A	A	G	A	G	A
142	142	M142	SCSC-10_GI_10_1	A/G	3	CSC-10_GI_10	1694732	+	N	G	G	A	A	A	A	N	G	A	A	N	G	N	N	G	A	N	R	G	G	G	G	A	G	G	N	G	N	A	G	G	N	A	A	A	A	G	A	G	A
143	143	M143	SCSC-10_GI_10_1	C/T	3	CSC-10_GI_10	1694765	+	N	T	T	C	C	C	C	N	T	C	C	N	T	N	N	T	C	N	Y	T	T	T	T	C	T	T	N	T	N	C	T	T	N	C	C	C	C	T	C	T	C
144	144	M144	SCSC-10_GI_10_1	G/A	3	CSC-10_GI_10	1719005	+	A	A	N	G	G	G	G	N	A	G	G	N	A	N	N	A	G	N	R	A	A	A	G	A	A	A	N	A	N	G	A	A	N	G	G	G	G	A	G	A	G
145	145	M145	SCSC-10_GI_10_1	C/T	3	CSC-10_GI_10	1719229	+	N	T	N	C	C	C	C	N	T	C	C	N	T	N	N	T	C	N	Y	T	T	T	C	T	T	T	N	T	N	C	T	T	N	C	C	C	C	T	C	T	C
146	146	M146	SCSC-10_GI_10_1	A/G	3	CSC-10_GI_10	1719258	+	N	G	N	A	A	A	A	N	G	N	A	N	G	N	N	G	A	N	R	G	G	G	A	G	N	G	N	G	N	A	G	G	N	A	A	A	A	G	A	G	A
147	147	M147	SCSC-10_GI_10_1	A/G	3	CSC-10_GI_10	1719270	+	N	G	N	A	A	A	A	N	G	N	A	N	G	N	N	G	A	N	R	G	G	G	A	G	N	G	N	G	N	A	G	G	N	A	A	A	A	G	A	G	A
148	148	M148	SCSC-10_GI_10_1	T/C	3	CSC-10_GI_10	1719300	+	N	C	N	T	T	T	T	N	C	N	T	N	C	N	N	C	T	N	Y	C	C	C	T	C	N	C	N	C	N	T	C	C	N	T	T	T	T	C	T	C	T
149	149	M149	SCSC-10_GI_10_1	A/C	3	CSC-10_GI_10	1719667	+	N	C	N	A	A	A	A	N	C	A	A	N	C	N	N	C	A	N	M	C	C	C	A	C	C	C	N	C	N	A	C	C	N	A	A	A	A	C	A	C	A
150	150	M150	SCSC-10_GI_10_1	G/T	3	CSC-10_GI_10	1743689	+	N	T	N	G	G	G	G	N	T	G	G	N	T	N	N	T	G	N	G	T	T	T	G	T	N	T	N	T	N	G	T	T	N	G	G	G	G	T	G	T	G
151	151	M151	SCSC-10_GI_10_1	A/G	3	CSC-10_GI_10	1764535	+	N	G	N	A	A	A	A	N	G	A	A	N	G	N	N	G	N	N	R	G	G	G	A	G	N	G	N	G	N	A	G	G	N	A	A	A	A	G	A	G	A
154	154	M154	SCSC-10_GI_10_1	T/A	3	CSC-10_GI_10	1791775	+	N	A	N	T	T	W	T	N	A	T	T	N	A	N	N	A	T	N	W	A	A	A	T	A	N	A	N	A	N	T	A	A	N	T	T	T	T	A	T	A	T
155	155	M155	SCSC-10_GI_10_1	G/A	3	CSC-10_GI_10	1865974	+	N	A	N	G	G	G	G	N	A	G	G	N	A	N	N	A	A	N	R	A	A	A	G	G	A	A	N	A	N	G	A	A	N	G	G	G	G	A	G	A	G
156	156	M156	SCSC-10_GI_10_1	T/A	3	CSC-10_GI_10	1868673	+	N	A	N	T	T	T	T	N	A	T	T	N	A	N	N	A	A	N	T	A	A	A	T	T	N	A	N	A	N	T	A	A	N	T	T	T	T	A	T	A	T
157	157	M157	SCSC-10_GI_10_1	C/T	3	CSC-10_GI_10	1881102	+	N	T	N	C	C	C	C	N	T	C	C	N	T	N	N	T	T	N	Y	T	T	T	C	C	N	T	N	T	N	C	T	T	N	C	C	C	C	T	C	T	C
161	161	M161	SCSC-10_GI_10_1	G/C	3	CSC-10_GI_10	1895017	+	N	C	C	G	G	G	G	N	C	G	G	N	C	N	N	C	C	N	S	C	C	C	G	G	N	C	N	C	N	G	C	C	N	G	G	G	G	C	G	C	G
162	162	M162	SCSC-10_GI_10_1	T/C	3	CSC-10_GI_10	1981127	+	N	C	N	T	T	T	T	N	C	T	T	N	C	N	N	C	C	N	T	C	C	C	T	T	T	C	N	C	N	T	C	C	N	T	T	T	T	C	T	C	T
167	167	M167	SCSC-10_GI_10_1	T/A	3	CSC-10_GI_10	1999685	+	T	A	N	T	T	T	T	N	A	T	T	N	A	N	N	A	A	N	T	A	A	A	T	T	T	A	N	A	N	T	A	A	N	T	T	T	T	A	T	A	T
168	168	M168	SCSC-10_GI_10_2	C/G	3	CSC-10_GI_10	2184102	+	N	G	N	C	C	C	C	N	G	C	C	N	G	N	N	G	G	N	C	G	G	G	G	C	N	G	N	G	N	C	G	G	N	C	C	C	C	G	C	G	C
169	169	M169	SCSC-10_GI_10_2	T/G	3	CSC-10_GI_10	2184134	+	N	G	N	T	T	T	T	N	G	T	T	N	G	N	N	G	G	N	T	G	G	G	G	T	N	G	N	G	N	T	G	G	N	T	T	T	T	G	T	G	T
170	170	M170	SCSC-10_GI_10_2	G/A	3	CSC-10_GI_10	2184156	+	N	A	N	G	G	G	G	N	A	G	G	N	A	N	N	A	A	N	G	A	A	A	A	G	N	A	N	A	N	G	A	A	N	G	G	G	G	A	G	A	G
171	171	M171	SCSC-10_GI_10_2	A/T	3	CSC-10_GI_10	2184488	+	N	T	T	A	A	A	A	N	T	A	A	N	T	N	N	T	N	N	A	T	T	T	T	A	A	T	N	T	N	A	T	T	N	A	A	A	A	T	A	T	A
172	172	M172	SCSC-10_GI_10_2	A/T	3	CSC-10_GI_10	2239341	+	N	T	N	A	A	A	A	N	T	A	A	N	T	N	N	T	T	N	A	T	T	T	A	A	A	T	N	T	N	A	T	T	N	A	A	A	A	T	A	T	A
173	173	M173	SCSC-10_GI_10_2	T/C	3	CSC-10_GI_10	2356441	+	C	C	N	T	T	T	T	N	C	Y	T	N	C	N	N	C	C	N	T	C	C	C	T	T	T	C	N	C	N	T	C	C	N	T	T	T	T	C	T	C	T
174	174	M174	SCSC-10_GI_10_2	A/T	3	CSC-10_GI_10	2379347	+	N	T	N	A	A	A	A	N	T	W	A	A	T	N	N	T	T	N	A	T	T	T	A	A	N	T	N	T	N	A	T	T	N	A	A	A	A	T	A	T	A
175	175	M175	SCSC-10_GI_10_2	C/A	3	CSC-10_GI_10	2391671	+	A	A	N	C	C	C	C	N	A	M	C	N	A	N	N	A	A	N	C	A	A	A	C	C	N	A	N	A	N	C	A	A	C	C	C	C	C	A	C	A	C
176	176	M176	SCSC-10_GI_10_2	G/A	3	CSC-10_GI_10	2416722	+	A	A	N	G	G	G	G	N	A	R	G	N	A	N	N	A	A	N	G	A	A	A	G	G	G	A	N	A	N	G	A	A	N	G	G	G	G	A	G	A	G
177	177	M177	SCSC-10_GI_10_2	C/T	3	CSC-10_GI_10	2422112	+	T	T	N	C	C	C	C	N	T	Y	C	N	T	N	N	T	T	N	C	T	T	T	Y	C	C	T	N	T	N	C	T	T	N	C	C	C	C	T	C	T	C
178	178	M178	SCSC-10_GI_10_2	A/G	3	CSC-10_GI_10	2422338	+	N	G	N	A	A	A	A	N	G	R	A	N	G	N	N	G	G	N	A	G	G	G	R	A	A	G	N	G	N	A	G	G	N	A	A	A	A	G	A	G	A
179	179	M179	SCSC-10_GI_10_2	G/A	3	CSC-10_GI_10	2434205	+	N	A	N	G	G	G	G	N	A	R	G	N	A	N	N	A	A	N	G	A	A	A	R	G	N	A	N	A	N	G	A	A	N	G	G	G	G	A	G	A	G
180	180	M180	SCSC-10_GI_10_2	T/C	3	CSC-10_GI_10	2434207	+	N	C	N	T	T	T	T	N	C	Y	T	N	C	N	N	C	C	N	T	C	C	C	Y	T	N	C	N	C	N	T	C	C	N	T	T	T	T	C	T	C	T
181	181	M181	SCSC-10_GI_10_2	C/T	3	CSC-10_GI_10	2434214	+	N	T	N	C	C	C	C	N	T	Y	C	N	T	N	N	T	T	N	C	T	T	T	Y	C	N	T	N	T	N	C	T	T	N	C	C	C	C	T	C	T	C
182	182	M182	SCSC-10_GI_10_2	T/C	3	CSC-10_GI_10	2443971	+	N	C	N	T	T	T	T	N	C	T	T	N	C	N	N	C	C	N	T	C	C	C	Y	T	T	C	N	C	N	T	C	C	N	T	T	T	T	C	T	C	T
183	183	M183	SCSC-10_GI_10_2	T/A	3	CSC-10_GI_10	2481069	+	A	A	N	T	T	T	T	N	A	W	T	N	A	N	N	A	A	N	T	A	A	A	W	T	N	A	N	A	N	T	A	A	N	T	T	T	T	A	T	A	T
184	184	M184	SCSC-10_GI_10_2	C/G	3	CSC-10_GI_10	2481096	+	G	G	N	C	C	C	C	N	G	S	C	N	G	N	N	G	G	N	C	G	G	G	S	C	N	G	N	G	N	C	G	G	N	C	C	C	C	G	C	G	C
185	185	M185	SCSC-10_GI_10_2	C/T	3	CSC-10_GI_10	2481105	+	T	T	N	C	C	C	C	N	T	Y	C	N	T	N	N	T	T	N	C	T	T	T	Y	C	N	T	N	T	N	C	T	T	N	C	C	C	C	T	C	T	C
186	186	M186	SCSC-10_GI_10_2	C/T	3	CSC-10_GI_10	2487391	+	T	T	T	C	C	C	C	N	T	Y	C	N	T	N	N	T	T	N	C	T	T	T	Y	C	C	T	N	T	N	C	T	T	N	C	C	C	C	T	C	T	C
187	187	M187	SCSC-10_GI_10_2	A/T	3	CSC-10_GI_10	2493846	+	N	T	N	A	A	A	A	N	T	W	A	N	T	N	N	T	T	N	A	T	T	T	W	A	N	T	N	T	N	A	T	T	N	A	A	A	A	T	A	T	A
188	188	M188	SCSC-10_GI_10_2	C/T	3	CSC-10_GI_10	2493872	+	N	T	N	C	C	C	C	N	T	Y	C	N	T	N	N	T	T	N	C	T	T	T	Y	C	N	T	N	T	N	C	T	T	N	C	C	C	C	T	C	T	C
189	189	M189	SCSC-10_GI_10_2	C/T	3	CSC-10_GI_10	2552512	+	N	T	N	C	C	C	C	N	T	C	C	N	T	N	N	T	T	N	C	T	T	T	Y	C	C	T	N	T	N	C	T	T	N	C	C	C	C	T	C	T	C
190	190	M190	SCSC-10_GI_10_2	C/T	3	CSC-10_GI_10	2613544	+	N	T	N	C	C	C	C	N	T	Y	C	N	T	N	N	T	T	N	C	T	T	T	Y	C	N	T	N	T	N	C	T	T	N	C	C	C	C	T	C	T	C
191	191	M191	SCSC-10_GI_10_2	A/T	3	CSC-10_GI_10	2653101	+	N	T	N	A	A	A	A	N	T	T	A	N	A	N	N	T	T	N	A	T	T	T	T	A	A	T	N	T	N	A	T	T	N	A	A	A	A	T	N	T	A
192	192	M192	SCSC-10_GI_10_2	T/G	3	CSC-10_GI_10	2700176	+	N	G	N	T	T	T	T	N	G	K	T	N	T	N	N	G	G	N	T	G	G	G	G	T	T	G	N	G	N	T	G	G	N	T	T	T	T	G	T	G	T
193	193	M193	SCSC-10_GI_10_2	C/T	3	CSC-10_GI_10	2733888	+	N	T	N	C	C	C	C	N	T	Y	C	N	C	N	N	T	T	N	C	T	T	T	T	C	N	T	N	T	N	C	T	T	N	C	C	C	C	T	C	T	C
194	194	M194	SCSC-10_GI_10_2	G/A	3	CSC-10_GI_10	2733914	+	N	A	N	G	G	G	G	N	A	R	G	N	G	N	N	A	A	N	G	A	A	A	A	G	N	A	N	A	N	G	A	A	N	G	G	G	G	A	G	A	G
195	195	M195	SCSC-10_GI_10_2	T/C	3	CSC-10_GI_10	2733915	+	N	C	N	T	T	T	T	N	C	Y	T	N	T	N	N	C	C	N	T	C	C	C	C	T	N	C	N	C	N	T	C	C	N	T	T	T	T	C	T	C	T
196	196	M196	SCSC-10_GI_10_2	T/A	3	CSC-10_GI_10	2733918	+	N	A	N	T	T	T	T	N	A	W	T	N	T	N	N	A	A	N	T	A	A	A	A	T	N	A	N	A	N	T	A	A	N	T	T	T	T	A	T	A	T
197	197	M197	SCSC-10_GI_10_2	A/G	3	CSC-10_GI_10	2733968	+	N	G	N	A	A	A	A	N	G	R	A	N	A	N	N	G	G	N	A	G	G	G	G	A	A	G	N	G	N	A	G	G	N	A	A	A	A	G	A	G	A
198	198	M198	SCSC-10_GI_10_2	C/T	3	CSC-10_GI_10	2747012	+	N	T	N	C	C	C	C	N	T	Y	C	N	C	N	N	T	T	N	C	T	T	T	T	C	C	T	N	T	N	C	T	T	N	C	C	C	C	T	C	T	C
199	199	M199	SCSC-10_GI_10_2	T/A	3	CSC-10_GI_10	2747575	+	N	A	N	T	T	T	T	N	A	W	T	N	T	N	N	A	A	N	T	A	A	A	A	T	T	A	N	A	N	T	A	A	N	T	T	T	T	A	T	A	T
200	200	M200	SCSC-10_GI_10_2	C/A	3	CSC-10_GI_10	2747577	+	N	A	N	C	C	C	C	N	A	M	C	N	C	N	N	A	A	N	C	A	A	A	A	C	C	A	N	A	N	C	A	A	N	C	C	C	C	A	C	A	C
205	205	M205	SCSC-10_GI_10_2	T/C	3	CSC-10_GI_10	2756330	+	N	C	N	T	T	T	T	N	C	Y	T	N	T	N	N	C	C	N	T	C	C	C	C	T	N	C	N	C	N	T	C	C	N	T	T	T	T	C	T	C	T
206	206	M206	SCSC-10_GI_10_2	T/C	3	CSC-10_GI_10	2756331	+	N	C	N	T	T	T	T	N	C	Y	T	N	T	N	N	C	C	N	T	C	C	C	C	T	N	C	N	C	N	T	C	C	N	T	T	T	T	C	T	C	T
207	207	M207	SCSC-10_GI_10_2	G/T	3	CSC-10_GI_10	2790789	+	N	T	N	G	G	G	G	N	T	K	G	N	G	N	N	T	T	N	G	T	T	T	T	G	G	T	N	T	N	G	G	T	N	G	G	G	G	T	G	T	G
209	209	M209	SCSC-10_GI_10_2	C/G	3	CSC-10_GI_10	2845165	+	N	G	N	C	C	C	C	N	G	S	C	N	C	N	N	G	G	N	C	G	G	G	G	C	C	G	N	G	N	C	C	G	N	C	C	C	C	G	C	G	C
210	210	M210	SCSC-10_GI_10_2	A/C	3	CSC-10_GI_10	2903110	+	N	C	N	A	A	A	A	N	C	M	A	N	A	N	N	C	C	N	A	A	C	C	C	A	A	C	N	C	N	A	A	C	N	A	A	A	A	C	A	C	A
211	211	M211	SCSC-10_GI_10_2	T/A	3	CSC-10_GI_10	2903115	+	N	A	N	T	T	T	T	N	A	W	T	N	T	N	N	A	A	N	T	T	A	A	A	T	T	A	N	A	N	T	T	A	N	T	T	T	T	A	T	A	T
212	212	M212	SCSC-10_GI_10_2	T/C	3	CSC-10_GI_10	2925255	+	N	C	N	T	T	T	T	N	C	Y	T	N	T	N	N	C	C	N	T	T	C	C	C	T	N	C	N	C	N	T	T	C	N	T	T	T	T	C	T	C	T
213	213	M213	SCSC-10_GI_10_2	T/A	3	CSC-10_GI_10	2925274	+	N	A	N	T	T	T	T	N	A	W	T	N	T	N	N	A	A	N	T	T	A	A	A	T	N	A	N	A	N	T	T	A	N	T	T	T	T	A	T	A	T
214	214	M214	SCSC-10_GI_10_3	T/G	3	CSC-10_GI_10	3054025	+	N	G	N	T	T	T	T	N	G	K	T	N	T	N	N	G	G	N	T	T	G	G	G	G	T	G	N	G	N	T	T	G	N	T	T	T	T	G	T	G	T
217	217	M217	SCSC-10_GI_10_3	A/G	3	CSC-10_GI_10	3074251	+	N	G	N	A	A	A	A	N	G	R	A	N	A	N	N	G	G	N	A	A	G	G	G	G	N	G	N	G	N	A	A	G	N	A	A	A	A	G	A	G	A
218	218	M218	SCSC-10_GI_10_3	T/A	3	CSC-10_GI_10	3074385	+	N	A	N	T	T	T	T	N	A	W	T	N	T	N	N	A	A	N	T	T	A	A	A	A	T	A	N	A	N	T	T	A	N	T	T	T	T	A	T	A	T
219	219	M219	SCSC-10_GI_10_3	A/T	3	CSC-10_GI_10	3079722	+	N	T	N	A	A	A	A	N	T	W	A	N	A	N	N	T	T	N	A	A	T	T	T	T	A	T	N	T	N	A	A	T	N	A	A	A	A	T	A	T	A
220	220	M220	SCSC-10_GI_10_3	T/C	3	CSC-10_GI_10	3101048	+	N	C	N	T	T	T	T	N	C	Y	T	N	T	N	N	C	C	N	T	T	C	C	C	C	T	C	N	C	N	T	T	C	N	T	T	T	T	C	T	C	T
221	221	M221	SCSC-10_GI_10_3	A/G	3	CSC-10_GI_10	3101280	+	N	G	N	A	A	A	A	N	G	R	A	N	A	N	N	G	G	N	A	A	G	G	G	G	A	G	N	G	N	A	A	G	N	A	A	A	A	G	A	G	A
224	224	M224	SCSC-10_GI_10_3	C/T	3	CSC-10_GI_10	3119716	+	N	T	N	C	C	C	C	N	T	Y	C	N	C	N	N	T	T	N	C	C	T	T	T	T	C	T	N	T	N	C	C	T	N	C	C	C	C	T	C	T	C
225	225	M225	SCSC-10_GI_10_3	G/A	3	CSC-10_GI_10	3124968	+	N	A	N	G	G	G	G	N	A	R	G	N	G	N	N	A	A	N	G	G	A	A	A	A	N	A	N	A	N	G	G	A	N	G	G	G	G	A	G	A	G
226	226	M226	SCSC-10_GI_10_3	A/C	3	CSC-10_GI_10	3160564	+	N	C	N	A	A	A	A	N	C	M	A	N	A	N	N	C	C	N	A	A	C	C	C	C	N	C	N	C	N	A	A	C	N	A	A	A	A	C	A	C	A
227	227	M227	SCSC-10_GI_10_3	T/A	3	CSC-10_GI_10	3160567	+	N	A	N	T	T	T	T	N	A	W	T	N	T	N	N	A	A	N	T	T	A	A	A	A	N	A	N	A	N	T	T	A	N	T	T	T	T	A	T	A	T
228	228	M228	SCSC-10_GI_10_3	T/C	3	CSC-10_GI_10	3206386	+	N	C	N	T	T	T	T	N	C	Y	T	N	T	N	N	C	C	N	T	T	C	C	C	C	N	C	N	C	N	T	T	C	N	T	T	T	T	C	T	C	T
229	229	M229	SCSC-10_GI_10_3	G/C	3	CSC-10_GI_10	3298982	+	G	C	N	G	G	G	G	N	C	S	G	N	G	N	N	C	C	N	C	G	C	C	C	C	G	C	N	G	N	G	G	C	N	G	G	G	G	C	G	C	G
230	230	M230	SCSC-10_GI_10_3	T/C	3	CSC-10_GI_10	3315565	+	N	C	N	T	T	T	T	N	C	Y	T	N	T	N	N	C	C	N	C	T	C	C	C	C	N	C	N	T	N	T	T	C	N	T	T	T	T	C	T	C	T
231	231	M231	SCSC-10_GI_10_3	C/T	3	CSC-10_GI_10	3321883	+	N	T	N	C	C	C	C	N	T	T	C	N	C	N	N	T	T	N	T	C	T	T	T	T	C	T	N	C	N	C	C	T	N	C	C	C	C	T	C	T	C
232	232	M232	SCSC-10_GI_10_3	C/G	3	CSC-10_GI_10	3345703	+	N	G	N	C	C	C	C	N	G	S	C	N	C	N	N	G	G	N	G	C	G	G	G	G	C	G	N	C	N	C	C	G	N	C	C	C	C	G	C	G	C
233	233	M233	SCSC-10_GI_10_3	C/T	3	CSC-10_GI_10	3411286	+	N	T	N	C	C	C	C	N	T	Y	C	N	C	N	N	T	T	N	T	C	T	T	T	T	C	T	N	C	N	C	C	T	N	C	C	C	C	T	C	T	C
234	234	M234	SCSC-10_GI_10_3	A/G	3	CSC-10_GI_10	3517409	+	A	G	N	A	A	A	A	N	G	A	A	N	A	N	N	G	N	N	G	A	G	G	G	G	N	G	N	A	N	A	A	G	N	A	G	A	A	G	A	G	A
235	235	M235	SCSC-10_GI_10_3	G/A	3	CSC-10_GI_10	3519182	+	N	A	N	G	G	G	G	N	A	R	G	N	G	N	N	A	A	N	A	G	A	A	A	A	G	A	N	G	N	G	G	A	N	G	A	G	G	A	G	A	G
236	236	M236	SCSC-10_GI_10_3	G/T	3	CSC-10_GI_10	3519195	+	N	T	N	G	G	G	G	N	T	K	G	N	G	N	N	T	T	N	T	G	T	T	T	T	G	T	N	G	N	G	G	T	N	G	T	G	G	T	G	T	G
237	237	M237	SCSC-10_GI_10_3	G/A	3	CSC-10_GI_10	3519228	+	N	A	N	G	G	G	G	N	A	R	G	N	G	N	N	A	A	N	A	G	A	A	A	A	G	A	N	G	N	G	G	A	N	G	A	G	G	A	G	A	G
238	238	M238	SCSC-10_GI_10_3	C/T	3	CSC-10_GI_10	3519267	+	N	T	N	C	C	C	C	N	T	Y	C	N	C	N	N	T	T	N	T	C	T	T	T	T	C	T	N	C	N	C	C	T	N	C	T	C	C	T	C	T	C
246	246	M246	SCSC-10_GI_10_3	A/G	3	CSC-10_GI_10	3564704	+	N	G	G	A	A	A	A	N	G	R	A	N	A	N	N	G	G	N	G	A	G	G	G	G	A	G	N	A	N	A	A	G	N	A	G	A	A	G	A	A	A
247	247	M247	SCSC-10_GI_10_3	T/C	3	CSC-10_GI_10	3570551	+	N	C	N	T	T	T	T	N	C	Y	T	N	T	N	N	C	C	N	C	T	C	C	C	C	T	C	N	T	N	T	T	C	N	T	C	T	T	C	T	T	T
250	250	M250	SCSC-10_GI_10_3	T/C	3	CSC-10_GI_10	3596940	+	N	T	N	T	T	T	C	N	T	T	T	N	T	N	N	T	C	N	C	T	C	T	T	T	C	C	N	T	N	T	T	C	N	C	T	Y	C	T	T	C	T
254	254	M254	SCSC-10_GI_10_3	T/C	3	CSC-10_GI_10	3891807	+	N	T	N	T	T	T	T	N	C	Y	T	N	T	N	N	C	C	N	C	T	C	C	C	C	T	C	N	T	N	T	T	C	N	T	C	T	T	C	T	T	T
255	255	M255	SCSC-10_GI_10_3	T/G	3	CSC-10_GI_10	3892040	+	N	T	N	T	T	T	T	N	G	K	T	N	T	N	N	G	G	N	G	T	G	G	G	G	N	G	N	T	N	T	T	G	N	T	G	T	T	G	T	T	T
256	256	M256	SCSC-10_GI_10_3	A/G	3	CSC-10_GI_10	3904623	+	N	A	N	A	A	A	A	N	G	R	A	N	A	N	N	G	G	N	G	A	G	G	G	G	A	G	N	G	N	A	A	G	N	A	G	A	A	G	A	A	A
257	257	M257	SCSC-10_GI_10_4	G/A	3	CSC-10_GI_10	4048484	+	N	G	N	G	G	G	G	N	A	R	G	N	G	N	N	A	R	N	A	G	A	A	A	A	N	A	N	A	N	G	G	A	N	G	A	G	G	A	G	G	G
258	258	M258	SCSC-10_GI_10_4	G/A	3	CSC-10_GI_10	4049094	+	N	G	N	G	G	G	G	N	A	A	G	N	G	N	N	A	A	N	A	G	A	A	A	A	N	A	N	A	N	G	G	A	N	G	A	G	G	A	G	G	G
259	259	M259	SCSC-10_GI_10_4	C/T	3	CSC-10_GI_10	4070177	+	N	C	N	C	C	C	C	N	T	Y	C	N	C	N	N	T	T	N	T	C	T	T	T	T	N	T	N	T	N	C	C	T	N	Y	T	C	C	T	C	C	C
333	333	M333	SCSC-10_GI_10_4	C/G	3	CSC-10_GI_10	4374625	+	N	C	N	C	C	C	C	N	G	S	C	N	C	N	N	G	G	N	N	C	G	C	G	G	N	G	N	G	N	N	C	G	N	C	G	C	C	G	C	C	C
431	431	M431	SCSC-10_GI_10_4	T/A	3	CSC-10_GI_10	4698017	+	N	T	N	T	T	T	T	N	A	W	T	N	T	N	N	A	A	N	A	T	A	T	A	A	A	A	N	A	N	T	T	A	N	T	A	T	T	A	T	T	T
432	432	M432	SCSC-10_GI_10_4	A/C	3	CSC-10_GI_10	4698037	+	N	A	N	A	A	A	A	N	C	M	A	N	A	N	N	C	C	N	C	A	C	A	C	C	C	C	N	C	N	A	A	C	N	A	C	A	A	C	A	A	A
433	433	M433	SCSC-10_GI_10_4	G/A	3	CSC-10_GI_10	4698202	+	N	G	N	G	G	G	G	N	A	R	G	N	G	N	N	A	A	N	A	G	A	G	A	A	N	A	N	A	N	G	G	A	N	G	A	G	G	A	G	G	G
434	434	M434	SCSC-10_GI_10_4	T/G	3	CSC-10_GI_10	4698295	+	N	T	N	T	T	T	T	N	G	K	T	N	T	N	N	G	G	N	G	T	G	T	G	G	G	G	N	G	N	T	T	G	N	T	G	T	T	G	T	T	T
435	435	M435	SCSC-10_GI_10_4	G/A	3	CSC-10_GI_10	4698306	+	N	G	N	G	G	G	G	N	A	R	G	N	G	N	N	A	A	N	A	G	A	G	A	A	A	A	N	A	N	G	G	A	N	G	A	G	G	A	G	G	G
436	436	M436	SCSC-10_GI_10_4	C/T	3	CSC-10_GI_10	4716159	+	N	C	N	C	C	C	C	N	T	Y	C	N	C	N	N	T	T	N	T	C	T	C	T	T	N	T	N	T	N	C	C	T	N	C	T	C	C	T	C	C	C
437	437	M437	SCSC-10_GI_10_4	G/A	3	CSC-10_GI_10	4716516	+	N	G	N	G	G	G	G	N	A	R	G	N	G	N	N	A	A	N	A	G	A	G	A	A	A	A	N	A	N	G	G	A	N	G	A	G	G	A	G	G	G
522	522	M522	SCSC-10_GI_10_4	A/T	3	CSC-10_GI_10	4849478	+	N	W	N	W	A	A	T	N	T	A	A	N	A	N	N	A	T	N	W	T	T	T	W	A	N	A	N	A	N	A	T	T	N	A	T	T	A	T	A	T	T
543	543	M543	SCSC-10_GI_10_4	T/A	3	CSC-10_GI_10	4961699	+	N	T	N	T	T	N	T	N	A	W	T	N	T	N	N	A	A	N	A	T	A	T	A	A	A	A	N	A	N	T	T	A	N	T	A	T	T	A	T	T	T
544	544	M544	SCSC-10_GI_10_4	T/G	3	CSC-10_GI_10	4961715	+	N	T	N	T	T	N	T	N	G	K	T	N	T	N	N	G	G	N	G	T	G	T	G	G	G	G	N	G	N	T	T	G	N	T	G	T	T	G	T	T	T
545	545	M545	SCSC-10_GI_10_4	A/G	3	CSC-10_GI_10	4961739	+	N	A	N	A	A	N	A	N	G	R	A	N	A	N	N	G	G	N	G	A	G	A	G	G	G	G	N	G	N	A	A	G	N	A	G	A	A	G	A	A	A
546	546	M546	SCSC-10_GI_10_4	G/A	3	CSC-10_GI_10	4961873	+	G	G	N	G	G	G	G	N	A	R	G	N	G	N	N	A	A	N	A	G	A	G	A	A	A	A	N	A	N	G	G	A	N	G	A	G	G	A	G	G	G
665	665	M665	SCSC-10_GI_10_5	T/G	3	CSC-10_GI_10	5000501	+	N	T	N	T	T	T	T	N	G	K	T	N	T	N	N	G	G	N	G	T	G	T	G	G	G	G	N	G	N	T	T	G	N	T	G	T	T	G	T	T	T
666	666	M666	SCSC-10_GI_10_5	C/A	3	CSC-10_GI_10	5000503	+	N	C	N	C	C	C	C	N	A	M	C	N	C	N	N	A	A	N	A	C	A	C	A	A	A	A	N	A	N	C	C	A	N	C	A	C	C	A	C	C	C
667	667	M667	SCSC-10_GI_10_5	G/C	3	CSC-10_GI_10	5011518	+	N	G	N	G	G	G	G	N	C	S	G	N	G	N	N	C	C	N	C	G	C	G	C	C	C	C	N	C	N	G	G	C	G	G	C	G	G	C	G	G	G
668	668	M668	SCSC-10_GI_10_5	A/G	3	CSC-10_GI_10	5011544	+	N	A	N	A	A	A	A	N	G	R	A	N	A	N	N	G	G	N	G	A	G	A	G	G	G	G	N	G	N	A	A	G	A	A	G	A	A	G	A	A	A
669	669	M669	SCSC-10_GI_10_5	T/G	3	CSC-10_GI_10	5011556	+	N	T	N	T	T	T	T	N	G	K	T	N	T	N	N	G	G	N	G	T	G	T	G	G	G	G	N	G	N	T	T	G	T	T	G	T	T	G	T	T	T
670	670	M670	SCSC-10_GI_10_5	A/G	3	CSC-10_GI_10	5011658	+	N	A	N	A	A	A	A	N	G	R	A	N	A	N	N	G	G	N	G	A	G	A	G	G	G	G	N	G	N	A	A	G	N	A	G	A	A	G	A	A	A
706	706	M706	SCSC-10_GI_10_5	C/T	3	CSC-10_GI_10	5076430	+	N	C	N	C	C	C	C	N	T	Y	C	N	C	N	N	T	T	N	T	C	T	C	T	T	N	T	N	T	N	C	C	T	N	C	T	C	C	T	C	C	C
747	747	M747	SCSC-10_GI_10_5	A/C	3	CSC-10_GI_10	5194201	+	N	A	N	A	A	A	A	N	C	M	A	N	A	N	N	C	C	N	C	A	C	A	C	C	N	C	N	C	N	A	A	C	N	A	C	A	A	C	A	A	A
757	757	M757	SCSC-10_GI_10_5	G/A	3	CSC-10_GI_10	5295475	+	N	G	N	G	G	G	G	N	A	R	G	N	G	N	N	A	A	N	A	G	A	G	A	A	A	A	N	A	N	G	G	A	N	G	A	G	G	A	G	G	G
760	760	M760	SCSC-10_GI_10_5	T/C	3	CSC-10_GI_10	5336451	+	N	T	N	T	T	T	T	N	C	T	T	N	T	N	N	C	C	N	C	T	C	T	C	C	N	C	N	C	N	T	T	C	N	T	C	T	T	C	T	T	T
761	761	M761	SCSC-10_GI_10_5	T/C	3	CSC-10_GI_10	5408958	+	T	T	N	T	T	T	T	N	C	Y	T	N	T	N	N	C	C	N	C	T	C	T	C	C	N	C	N	C	N	T	T	C	N	T	C	T	T	C	T	T	T
858	858	M858	SCSC-10_GI_10_5	A/C	3	CSC-10_GI_10	5509166	+	N	A	N	A	A	A	A	N	C	C	A	N	A	N	N	C	C	N	C	A	C	A	C	C	A	C	N	C	N	A	A	C	N	A	C	A	A	C	A	A	A
859	859	M859	SCSC-10_GI_10_5	G/C	3	CSC-10_GI_10	5589806	+	N	G	N	G	G	G	G	N	C	G	G	N	G	N	N	C	C	N	C	G	C	G	C	C	G	C	N	C	N	G	G	C	N	G	C	G	G	C	G	G	G
898	898	M898	SCSC-10_GI_10_5	G/C	3	CSC-10_GI_10	5674511	+	N	G	N	G	G	C	G	N	C	C	G	N	G	N	N	C	C	N	C	G	C	G	C	C	C	C	N	C	N	G	G	C	N	G	C	G	G	C	G	G	G
904	904	M904	SCSC-10_GI_10_5	G/T	3	CSC-10_GI_10	5733002	+	N	G	N	G	G	T	G	N	T	T	G	N	G	N	N	T	T	N	T	G	T	G	T	T	T	T	N	T	N	G	G	T	N	G	T	G	G	T	G	G	G
905	905	M905	SCSC-10_GI_10_5	A/G	3	CSC-10_GI_10	5733005	+	N	A	N	A	A	G	A	N	G	G	A	N	A	N	N	G	G	N	G	A	G	A	G	G	G	G	N	G	N	A	A	G	N	A	G	A	A	G	A	A	A
906	906	M906	SCSC-10_GI_10_5	C/T	3	CSC-10_GI_10	5733017	+	N	C	N	C	C	T	C	N	T	T	C	N	C	N	N	T	T	N	T	C	T	C	T	T	T	T	N	T	N	C	C	T	N	C	T	C	C	T	C	C	C
907	907	M907	SCSC-10_GI_10_5	G/A	3	CSC-10_GI_10	5733110	+	N	G	N	G	G	A	G	N	A	A	G	N	G	N	N	A	A	N	A	G	A	G	A	A	A	A	N	A	N	G	G	A	G	G	A	G	G	A	G	G	G
908	908	M908	SCSC-10_GI_10_5	A/G	3	CSC-10_GI_10	5733116	+	N	A	N	A	A	G	A	N	G	G	A	N	A	N	N	G	G	N	G	A	G	A	G	G	G	G	N	G	N	A	A	G	A	A	G	A	A	G	A	A	A
909	909	M909	SCSC-10_GI_10_5	T/C	3	CSC-10_GI_10	5733143	+	N	T	N	T	T	C	T	N	C	C	T	N	T	N	N	C	C	N	C	T	C	T	C	C	C	C	N	C	N	T	T	C	T	T	C	T	T	C	T	T	T
916	916	M916	SCSC-10_GI_10_5	C/T	3	CSC-10_GI_10	5862073	+	N	C	N	C	C	T	C	N	T	T	C	N	C	N	N	T	T	N	T	C	T	C	T	T	T	T	N	T	N	C	C	T	N	C	T	C	C	T	C	C	C
917	917	M917	SCSC-10_GI_10_5	C/G	3	CSC-10_GI_10	5954203	+	C	C	N	C	C	G	C	N	G	G	C	N	C	N	N	G	G	N	G	C	G	C	G	G	N	G	N	G	N	C	C	G	N	C	G	C	C	G	C	C	C
918	918	M918	SCSC-10_GI_10_5	A/G	3	CSC-10_GI_10	5954236	+	A	A	N	A	A	G	A	N	G	G	A	N	A	N	N	G	G	N	G	A	G	A	G	G	N	G	N	G	N	A	A	G	N	A	G	A	A	G	A	A	A
919	919	M919	SCSC-10_GI_10_5	C/G	3	CSC-10_GI_10	5990844	+	N	C	N	C	C	G	C	N	G	G	C	N	C	N	N	G	G	N	G	C	G	C	G	G	G	G	N	G	N	C	C	G	N	C	G	C	C	G	C	C	C
935	935	M935	SCSC-10_GI_10_6	C/T	3	CSC-10_GI_10	6083632	+	N	C	N	C	C	T	C	N	T	T	C	N	C	N	N	T	T	N	T	C	T	C	T	T	N	T	N	T	N	C	C	T	N	C	T	C	C	T	C	C	C
945	945	M945	SCSC-10_GI_10_6	G/A	3	CSC-10_GI_10	6614411	+	N	G	N	G	G	A	G	N	A	A	G	N	G	N	N	A	A	N	A	G	A	R	G	A	A	A	N	A	N	G	G	A	N	A	A	G	G	A	G	G	G
946	946	M946	SCSC-10_GI_10_6	G/T	3	CSC-10_GI_10	6614426	+	N	G	N	G	G	T	G	N	T	T	G	N	G	N	N	T	T	N	T	G	T	K	G	T	T	T	N	T	N	G	G	T	N	T	T	G	G	T	G	G	G
947	947	M947	SCSC-10_GI_10_6	T/A	3	CSC-10_GI_10	6614444	+	N	T	N	T	T	A	T	N	A	A	T	N	T	N	N	A	A	N	A	T	A	W	T	A	A	A	N	A	N	T	T	A	N	A	A	T	T	A	T	T	T
948	948	M948	SCSC-10_GI_10_6	G/A	3	CSC-10_GI_10	6720625	+	N	G	N	G	G	A	G	N	A	A	G	N	G	N	N	A	A	N	A	G	A	A	G	A	A	A	N	A	N	G	G	A	N	G	A	G	G	A	G	G	G
950	950	M950	SCSC-10_GI_10_6	G/A	3	CSC-10_GI_10	6758656	+	N	G	A	G	G	A	G	N	A	N	G	N	A	N	N	A	A	N	A	G	A	A	G	A	A	A	N	A	N	G	G	A	N	G	A	G	G	A	G	G	G
960	960	M960	SCSC-10_GI_10_6	C/T	3	CSC-10_GI_10	6815477	+	N	C	N	C	C	T	C	N	T	T	C	N	T	N	N	T	T	N	T	C	T	T	C	T	N	T	N	T	N	C	C	T	N	C	T	C	C	T	C	C	Y
961	961	M961	SCSC-10_GI_10_6	T/G	3	CSC-10_GI_10	6815510	+	N	T	N	T	T	G	T	N	G	G	T	N	G	N	N	G	G	N	G	T	G	G	T	G	N	G	N	G	N	T	T	G	N	T	G	T	T	G	T	T	K
962	962	M962	SCSC-10_GI_10_6	G/A	3	CSC-10_GI_10	6815525	+	N	G	N	G	G	A	G	N	A	A	G	N	A	N	N	A	A	N	A	G	A	A	G	A	N	A	N	A	N	G	G	A	N	G	A	G	G	A	G	G	R
963	963	M963	SCSC-10_GI_10_6	A/G	3	CSC-10_GI_10	6855828	+	N	A	N	A	A	G	A	N	G	G	A	N	G	N	N	G	G	N	G	A	G	G	A	G	G	G	N	G	N	A	A	G	N	A	G	A	A	G	A	A	R
964	964	M964	SCSC-10_GI_10_6	T/G	3	CSC-10_GI_10	6855843	+	N	T	N	T	T	G	T	N	G	G	T	N	G	N	N	G	G	N	G	T	G	G	T	G	G	G	N	G	N	T	T	G	N	T	G	T	T	G	T	T	K
965	965	M965	SCSC-10_GI_10_6	T/C	3	CSC-10_GI_10	6860183	+	T	T	N	T	T	Y	T	N	C	C	T	N	C	N	N	C	C	N	C	T	C	C	T	C	N	C	N	C	N	T	T	C	N	T	C	T	T	C	T	T	Y
968	968	M968	SCSC-10_GI_10_7	A/C	3	CSC-10_GI_10	7019099	+	N	A	N	A	A	C	A	N	C	C	A	N	C	N	N	C	C	N	C	A	A	C	A	C	C	C	N	A	N	A	A	C	N	A	C	A	A	C	C	A	M
969	969	M969	SCSC-10_GI_10_7	G/T	3	CSC-10_GI_10	7019115	+	N	G	N	G	G	T	G	N	T	T	G	N	T	N	N	T	T	N	T	G	G	T	G	T	T	T	N	G	N	G	G	T	N	G	T	G	G	T	T	G	K
970	970	M970	SCSC-10_GI_10_7	A/T	3	CSC-10_GI_10	7019132	+	N	A	N	A	A	T	A	N	T	T	A	N	T	N	N	T	T	N	T	A	A	T	A	T	T	T	N	A	N	A	A	T	N	A	T	A	A	T	T	A	W
971	971	M971	SCSC-10_GI_10_7	C/T	3	CSC-10_GI_10	7019216	+	N	C	N	C	C	T	C	N	T	T	C	N	T	N	N	T	N	N	T	C	C	T	C	T	N	T	N	C	N	C	C	T	N	C	T	C	C	T	T	C	Y
972	972	M972	SCSC-10_GI_10_7	A/C	3	CSC-10_GI_10	7019234	+	N	A	N	A	A	C	A	N	C	C	A	N	C	N	N	C	N	N	C	A	A	C	A	C	N	C	N	A	N	A	A	C	N	A	C	A	A	C	C	A	M
973	973	M973	SCSC-10_GI_10_7	A/G	3	CSC-10_GI_10	7022163	+	N	A	N	A	A	G	A	N	G	G	A	N	G	N	N	G	G	N	G	A	A	G	A	G	N	G	N	A	N	A	A	G	N	A	G	A	A	G	G	A	R
974	974	M974	SCSC-10_GI_10_7	T/C	3	CSC-10_GI_10	7022216	+	N	T	N	T	T	C	T	N	C	C	T	N	C	N	N	C	C	N	C	T	T	C	T	C	N	C	N	T	N	T	T	C	N	T	C	T	T	C	C	T	Y
975	975	M975	SCSC-10_GI_10_7	G/T	3	CSC-10_GI_10	7022259	+	N	G	N	G	G	T	G	N	T	T	G	N	T	N	N	T	T	N	T	G	G	T	G	T	N	T	N	G	N	G	G	T	N	G	T	G	G	T	T	G	K
976	976	M976	SCSC-10_GI_10_7	G/A	3	CSC-10_GI_10	7022265	+	N	G	N	G	G	A	G	N	A	A	G	N	A	N	N	A	A	N	A	G	G	A	G	A	N	A	N	G	N	G	G	A	N	G	A	G	G	A	A	G	R
977	977	M977	SCSC-10_GI_10_7	C/T	3	CSC-10_GI_10	7075661	+	N	C	N	C	C	T	C	N	T	T	C	N	T	N	N	T	T	N	T	C	C	T	C	T	N	T	N	C	N	C	C	T	N	C	T	C	C	T	T	C	Y
978	978	M978	SCSC-10_GI_10_7	A/T	3	CSC-10_GI_10	7247964	+	N	A	N	A	A	T	A	N	T	T	A	N	T	N	N	T	A	N	T	A	A	T	A	T	T	T	N	A	N	A	A	T	N	T	T	A	A	T	W	A	A
979	979	M979	SCSC-10_GI_10_7	T/C	3	CSC-10_GI_10	7248003	+	N	T	N	T	T	C	T	N	C	C	T	N	C	N	N	C	T	N	C	T	T	C	T	C	C	C	N	T	N	T	T	C	N	C	C	T	T	C	Y	T	T
980	980	M980	SCSC-10_GI_10_7	T/C	3	CSC-10_GI_10	7327056	+	N	T	N	T	T	C	T	N	C	C	T	N	C	N	N	C	T	N	C	T	Y	C	T	C	N	C	N	T	N	T	T	C	N	C	C	T	T	C	Y	C	T
982	982	M982	SCSC-10_GI_10_7	T/A	3	CSC-10_GI_10	7359021	+	N	T	N	T	T	A	T	N	A	A	T	N	A	N	N	A	N	N	A	T	A	A	T	A	A	A	N	T	N	T	T	A	N	W	A	T	T	A	W	A	T
983	983	M983	SCSC-10_GI_10_7	G/A	3	CSC-10_GI_10	7359060	+	N	G	N	G	G	A	G	N	A	A	G	N	A	N	N	A	N	N	A	G	A	A	G	A	A	A	N	G	N	G	G	A	N	R	A	G	G	A	R	A	G
984	984	M984	SCSC-10_GI_10_7	C/A	3	CSC-10_GI_10	7359069	+	N	C	N	C	C	A	C	N	A	A	C	N	A	N	N	A	N	N	A	C	A	A	C	A	A	A	N	C	N	C	C	A	N	M	A	C	C	A	M	A	C
985	985	M985	SCSC-10_GI_10_7	G/A	3	CSC-10_GI_10	7359314	+	N	G	G	G	G	A	G	N	A	A	G	N	A	N	N	A	G	N	A	G	R	A	G	A	A	A	N	G	N	G	G	A	N	R	A	G	G	A	R	A	G
986	986	M986	SCSC-10_GI_10_7	T/C	3	CSC-10_GI_10	7359325	+	N	T	T	T	T	C	T	N	C	C	T	N	C	N	N	C	T	N	C	T	Y	C	T	C	C	C	N	T	N	T	T	C	N	Y	C	T	T	C	Y	C	T
987	987	M987	SCSC-10_GI_10_7	C/T	3	CSC-10_GI_10	7372498	+	N	C	C	C	C	C	C	N	T	T	C	N	T	N	N	T	C	N	T	C	Y	T	C	T	N	T	N	C	N	C	C	T	N	C	T	C	C	T	Y	T	C
988	988	M988	SCSC-10_GI_10_7	C/T	3	CSC-10_GI_10	7372525	+	N	C	C	C	C	C	C	N	T	T	C	N	T	N	N	T	C	N	T	C	Y	T	C	T	N	T	N	C	N	C	C	T	N	C	T	C	C	T	Y	T	C
990	990	M990	SCSC-10_GI_10_7	T/C	3	CSC-10_GI_10	7696676	+	N	T	N	T	T	T	T	N	C	C	T	N	C	N	N	C	T	N	C	T	Y	C	T	C	C	T	N	T	N	C	T	C	N	Y	C	T	T	C	T	C	T
991	991	M991	SCSC-10_GI_10_7	C/T	3	CSC-10_GI_10	7696697	+	N	C	N	C	C	C	C	N	T	T	C	N	T	N	N	T	C	N	T	C	Y	T	C	T	T	C	N	C	N	T	C	T	N	Y	T	C	C	T	C	T	C
992	992	M992	SCSC-10_GI_10_7	G/A	3	CSC-10_GI_10	7721793	+	N	G	N	G	G	G	G	N	A	A	G	N	A	N	N	A	G	N	A	G	R	A	G	A	N	G	N	G	N	A	G	A	N	R	A	G	G	A	G	A	G
993	993	M993	SCSC-10_GI_10_7	A/C	3	CSC-10_GI_10	7721822	+	N	A	N	A	A	A	A	N	C	C	A	N	C	N	N	C	A	N	C	A	M	C	A	C	N	A	N	A	N	C	A	C	N	M	C	A	A	C	A	C	A
994	994	M994	SCSC-10_GI_10_7	A/G	3	CSC-10_GI_10	7805389	+	N	A	N	A	A	A	A	N	G	G	A	N	G	N	N	G	A	N	G	A	R	G	A	G	N	A	N	A	N	G	A	G	N	A	G	A	A	G	A	G	A
995	995	M995	SCSC-10_GI_10_7	C/G	3	CSC-10_GI_10	7805410	+	N	C	N	C	C	C	C	N	G	G	C	N	G	N	N	G	C	N	G	C	S	G	C	G	N	C	N	C	N	G	C	G	N	C	G	C	C	G	C	G	C
996	996	M996	SCSC-10_GI_10_7	G/A	3	CSC-10_GI_10	7805438	+	N	G	N	G	G	G	G	N	A	A	G	N	A	N	N	A	G	N	A	G	R	A	G	A	N	G	N	G	N	A	G	A	N	G	A	G	G	A	G	A	G
997	997	M997	SCSC-10_GI_10_7	C/T	3	CSC-10_GI_10	7811238	+	N	C	N	C	C	C	C	N	T	T	C	N	T	N	N	T	C	N	T	C	Y	T	C	T	N	C	N	C	N	T	C	T	N	Y	T	C	C	T	C	T	C
998	998	M998	SCSC-10_GI_10_7	T/C	3	CSC-10_GI_10	7811283	+	N	T	N	T	T	T	T	N	C	C	T	N	C	N	N	C	T	N	C	T	Y	C	T	C	N	T	N	T	N	C	T	C	N	Y	C	T	T	C	T	C	T
999	999	M999	SCSC-10_GI_10_7	C/G	3	CSC-10_GI_10	7811657	+	N	C	N	C	C	C	C	N	G	G	C	N	G	N	N	G	C	N	G	C	S	G	C	G	G	C	N	C	N	G	C	G	N	S	G	C	C	G	C	G	C
1000	1000	M1000	SCSC-10_GI_10_7	A/G	3	CSC-10_GI_10	7811682	+	N	A	N	A	A	A	A	N	G	G	A	N	G	N	N	G	A	N	G	A	R	G	A	G	G	A	N	A	N	G	A	G	N	R	G	A	A	G	A	G	A
1001	1001	M1001	SCSC-10_GI_10_7	G/A	3	CSC-10_GI_10	7821123	+	N	G	N	G	G	G	G	N	A	A	G	N	A	N	N	A	G	N	A	G	R	A	G	A	A	G	N	G	N	A	G	A	N	R	A	G	G	A	G	A	G
1002	1002	M1002	SCSC-10_GI_10_7	T/G	3	CSC-10_GI_10	7821138	+	N	T	N	T	T	T	T	N	G	G	T	N	G	N	N	G	T	N	G	T	K	G	T	G	G	T	N	T	N	G	T	G	N	K	G	T	T	G	T	G	T
1003	1003	M1003	SCSC-10_GI_10_7	A/G	3	CSC-10_GI_10	7821230	+	A	A	N	A	A	A	A	N	G	G	A	N	G	N	N	G	A	N	G	A	R	G	A	G	G	A	N	A	N	G	A	G	N	A	G	A	A	G	A	G	A
1004	1004	M1004	SCSC-10_GI_10_7	A/G	3	CSC-10_GI_10	7821236	+	A	A	N	A	A	A	A	N	G	G	A	N	G	N	N	G	A	N	G	A	R	G	A	G	G	A	N	A	N	G	A	G	N	A	G	A	A	G	A	G	A
1005	1005	M1005	SCSC-10_GI_10_7	T/C	3	CSC-10_GI_10	7821282	+	T	T	N	T	T	T	T	N	C	C	T	N	C	N	N	C	T	N	C	T	Y	C	T	C	C	T	N	T	N	C	T	C	N	T	C	T	T	C	T	C	T
1006	1006	M1006	SCSC-10_GI_10_7	A/T	3	CSC-10_GI_10	7821288	+	A	A	N	A	A	A	A	N	T	T	A	N	T	N	N	T	A	N	T	A	W	T	A	T	T	A	N	A	N	T	A	T	N	A	T	A	A	T	A	T	A
1008	1008	M1008	SCSC-10_GI_10_7	T/C	3	CSC-10_GI_10	7829716	+	N	T	N	T	T	T	T	N	C	C	T	N	C	N	N	C	T	N	C	T	Y	C	T	C	N	T	N	T	N	C	T	C	N	Y	C	T	T	C	T	C	T
1009	1009	M1009	SCSC-10_GI_10_7	T/A	3	CSC-10_GI_10	7874429	+	T	T	N	T	T	T	T	N	A	A	T	N	A	N	N	A	T	N	A	T	W	A	T	A	A	T	N	T	N	A	T	A	N	W	A	T	T	A	T	A	T
1010	1010	M1010	SCSC-10_GI_10_7	G/T	3	CSC-10_GI_10	7874475	+	G	G	N	G	G	G	G	N	T	T	G	N	T	N	N	T	G	N	T	G	K	T	G	T	T	G	N	G	N	T	G	T	N	K	T	G	G	T	G	T	G
1016	1016	M1016	SCSC-10_GI_10_7	G/A	3	CSC-10_GI_10	7918614	+	N	G	N	G	G	G	G	N	A	A	G	N	A	N	N	A	G	N	R	G	R	A	G	A	N	G	N	G	N	A	G	A	N	R	A	G	G	A	G	A	G
1017	1017	M1017	SCSC-10_GI_10_7	T/A	3	CSC-10_GI_10	7918617	+	N	T	N	T	T	T	T	N	A	A	T	N	A	N	N	A	T	N	W	T	W	A	T	A	N	T	N	T	N	A	T	A	N	W	A	T	T	A	T	A	T
1018	1018	M1018	SCSC-10_GI_10_7	G/A	3	CSC-10_GI_10	7918753	+	G	G	N	G	G	G	G	N	A	A	G	N	A	N	N	A	N	N	R	G	R	A	G	A	N	G	N	G	N	A	G	A	N	R	A	G	G	A	G	A	G
1019	1019	M1019	SCSC-10_GI_10_7	T/C	3	CSC-10_GI_10	7918818	+	N	T	N	T	T	T	T	N	C	C	T	N	C	N	N	C	T	N	Y	T	Y	C	T	C	N	T	N	T	N	C	T	C	N	Y	C	T	T	C	T	C	T
1020	1020	M1020	SCSC-10_GI_10_7	T/A	3	CSC-10_GI_10	7932930	+	N	T	N	T	T	T	T	N	A	A	T	N	A	N	N	A	T	N	W	T	W	A	T	A	N	T	N	T	N	A	T	A	N	W	A	T	T	A	T	A	T
1021	1021	M1021	SCSC-10_GI_10_7	C/A	3	CSC-10_GI_10	7933634	+	N	C	N	C	C	C	C	N	A	A	C	N	A	N	N	A	N	N	M	C	M	A	C	A	A	C	N	C	N	A	C	A	N	M	A	C	C	A	C	A	C
1022	1022	M1022	SCSC-10_GI_10_7	C/A	3	CSC-10_GI_10	7954367	+	N	C	N	C	C	C	C	N	A	A	C	N	A	N	N	A	C	N	M	C	M	A	C	A	A	C	N	C	N	A	C	A	N	C	A	C	C	A	C	A	C
1023	1023	M1023	SCSC-10_GI_10_7	A/C	3	CSC-10_GI_10	7954647	+	N	A	N	A	A	A	A	N	C	C	A	N	C	N	N	C	A	N	M	A	M	C	A	C	C	A	N	A	N	C	A	C	N	M	C	A	A	C	A	C	A
1024	1024	M1024	SCSC-10_GI_10_7	C/T	3	CSC-10_GI_10	7954649	+	N	C	N	C	C	C	C	N	T	T	C	N	T	N	N	T	C	N	Y	C	Y	T	C	T	T	C	N	C	N	T	C	T	N	Y	T	C	C	T	C	T	C
1025	1025	M1025	SCSC-10_GI_10_7	A/G	3	CSC-10_GI_10	7958114	+	A	A	N	A	A	A	A	N	G	G	A	N	G	N	N	G	A	N	R	A	R	G	A	G	N	A	N	A	N	G	A	G	G	R	G	A	A	G	A	G	A
1026	1026	M1026	SCSC-10_GI_10_7	C/T	3	CSC-10_GI_10	7962607	+	N	C	N	C	C	C	C	N	T	T	C	N	T	N	N	T	C	N	Y	C	Y	T	C	T	N	C	N	C	N	T	C	T	N	Y	T	C	C	T	C	T	C
1027	1027	M1027	SCSC-10_GI_10_7	C/T	3	CSC-10_GI_10	7962624	+	N	C	N	C	C	C	C	N	T	T	C	N	T	N	N	T	C	N	Y	C	Y	T	C	T	N	C	N	C	N	T	C	T	N	Y	T	C	C	T	C	T	C
1028	1028	M1028	SCSC-10_GI_10_7	T/A	3	CSC-10_GI_10	7962640	+	N	T	N	T	T	T	T	N	A	A	T	N	A	N	N	A	T	N	W	T	W	A	T	A	N	T	N	T	N	A	T	A	N	W	A	T	T	A	T	A	T
1029	1029	M1029	SCSC-10_GI_10_7	A/G	3	CSC-10_GI_10	7962645	+	N	A	N	A	A	A	A	N	G	G	A	N	G	N	N	G	A	N	R	A	R	G	A	G	N	A	N	A	N	G	A	G	N	R	G	A	A	G	A	G	A
1030	1030	M1030	SCSC-10_GI_10_7	G/C	3	CSC-10_GI_10	7962975	+	N	G	N	G	G	G	G	N	C	C	G	N	C	N	N	C	G	N	S	G	S	C	G	C	N	G	N	G	N	C	G	C	N	S	C	G	G	C	G	C	G
1031	1031	M1031	SCSC-10_GI_10_7	A/C	3	CSC-10_GI_10	7962993	+	N	A	N	A	A	A	A	N	C	C	A	N	C	N	N	C	A	N	M	A	M	C	A	C	N	A	N	A	N	C	A	C	N	M	C	A	A	C	A	C	A
1032	1032	M1032	SCSC-10_GI_10_7	T/A	3	CSC-10_GI_10	7962998	+	N	T	N	T	T	T	T	N	A	A	T	N	A	N	N	A	T	N	W	T	W	A	T	A	N	T	N	T	N	A	T	A	N	W	A	T	T	A	T	A	T
1033	1033	M1033	SCSC-10_GI_10_7	T/C	3	CSC-10_GI_10	7963050	+	N	T	N	T	T	T	T	N	C	C	T	N	C	N	N	C	T	N	Y	T	Y	C	T	C	N	T	N	T	N	C	T	C	N	Y	C	T	T	C	T	C	T
1034	1034	M1034	SCSC-10_GI_10_7	A/G	3	CSC-10_GI_10	7963065	+	N	A	N	A	A	A	A	N	G	G	A	N	G	N	N	G	A	N	R	A	R	G	A	G	N	A	N	A	N	G	A	G	N	R	G	A	A	G	A	G	A
1043	1043	M1043	SCSC-10_GI_10_8	G/T	3	CSC-10_GI_10	8038706	+	N	G	N	G	G	G	G	N	T	T	G	N	T	N	N	T	G	N	K	G	K	T	G	T	N	G	N	G	N	T	G	T	N	N	T	G	G	T	G	T	G
1044	1044	M1044	SCSC-10_GI_10_8	C/T	3	CSC-10_GI_10	8072974	+	N	C	N	C	C	C	C	N	T	T	C	N	T	N	N	T	C	N	Y	C	Y	T	C	T	N	C	N	C	N	T	C	T	N	C	T	C	C	T	C	T	C
1045	1045	M1045	SCSC-10_GI_10_8	A/G	3	CSC-10_GI_10	8072985	+	N	A	N	A	A	A	A	N	G	G	A	N	G	N	N	G	A	N	R	A	R	G	A	G	N	A	N	A	N	G	A	G	N	A	G	A	A	G	A	G	A
1048	1048	M1048	SCSC-10_GI_10_8	T/C	3	CSC-10_GI_10	8134729	+	N	T	N	T	T	T	T	N	C	C	T	N	C	N	N	C	T	N	T	T	Y	C	T	C	C	T	N	T	N	C	T	C	N	Y	C	T	T	C	T	C	T
1049	1049	M1049	SCSC-10_GI_10_8	T/C	3	CSC-10_GI_10	8137359	+	N	T	N	T	T	T	T	N	C	C	T	N	C	N	N	C	T	N	T	T	T	C	T	C	C	T	N	T	N	C	T	C	N	T	C	T	T	C	T	C	T
1050	1050	M1050	SCSC-10_GI_10_8	G/A	3	CSC-10_GI_10	8152784	+	N	G	N	G	G	G	G	N	A	N	G	N	A	N	N	A	G	N	G	G	R	A	G	A	A	G	N	G	N	A	G	A	N	R	A	G	G	A	G	A	G
1051	1051	M1051	SCSC-10_GI_10_8	A/T	3	CSC-10_GI_10	8222182	+	N	A	N	T	A	A	A	N	T	T	A	N	T	N	N	T	A	N	A	A	T	T	A	T	T	A	N	A	N	T	A	T	N	W	T	A	A	T	A	T	A
1058	1058	M1058	SCSC-10_GI_10_8	A/G	3	CSC-10_GI_10	8408327	+	A	A	N	G	A	A	A	N	G	A	A	N	G	N	N	G	A	N	A	A	G	G	A	G	N	A	N	A	N	G	A	A	N	R	G	A	A	G	A	G	A
1059	1059	M1059	SCSC-10_GI_10_8	T/C	3	CSC-10_GI_10	8408349	+	T	T	N	C	T	T	T	N	C	T	T	N	C	N	N	C	T	N	T	T	C	C	T	C	N	T	N	T	N	C	T	T	N	Y	C	T	T	C	T	C	T
1060	1060	M1060	SCSC-10_GI_10_8	G/A	3	CSC-10_GI_10	8408452	+	N	G	N	A	G	G	G	N	A	G	G	N	A	N	N	A	G	N	G	G	A	A	G	A	A	G	N	G	N	A	G	G	N	R	A	G	G	A	G	A	G
1061	1061	M1061	SCSC-10_GI_10_8	C/G	3	CSC-10_GI_10	8408453	+	N	C	N	G	C	C	C	N	G	C	C	N	G	N	N	G	C	N	C	C	G	G	C	G	G	C	N	C	N	G	C	C	N	S	G	C	C	G	C	G	C
1062	1062	M1062	SCSC-10_GI_10_8	T/C	3	CSC-10_GI_10	8409677	+	N	T	N	C	T	T	T	N	C	T	T	N	C	N	N	C	T	N	T	T	C	C	T	C	N	T	N	T	N	C	T	T	N	T	C	T	T	C	T	C	T
1063	1063	M1063	SCSC-10_GI_10_8	C/T	3	CSC-10_GI_10	8415459	+	N	C	N	T	C	C	C	N	T	N	C	N	T	N	N	T	C	N	C	C	T	T	C	T	T	C	N	C	N	T	C	C	N	Y	T	C	C	T	C	T	C
1064	1064	M1064	SCSC-10_GI_10_8	G/A	3	CSC-10_GI_10	8415469	+	N	G	N	A	G	G	G	N	A	N	G	N	A	N	N	A	G	N	G	G	A	A	G	A	A	G	N	G	N	A	G	G	N	R	A	G	G	A	G	A	G
1065	1065	M1065	SCSC-10_GI_10_8	A/T	3	CSC-10_GI_10	8420829	+	A	A	N	T	A	A	A	N	T	A	A	N	T	N	N	T	A	N	A	A	T	T	A	T	N	A	N	A	N	T	A	A	N	W	T	A	A	T	A	T	A
1066	1066	M1066	SCSC-10_GI_10_8	C/G	3	CSC-10_GI_10	8435791	+	N	C	N	G	C	C	C	N	G	C	C	N	G	N	N	G	C	N	C	C	G	G	C	G	G	C	N	C	N	G	C	C	N	S	G	C	C	G	C	G	C
1067	1067	M1067	SCSC-10_GI_10_8	G/A	3	CSC-10_GI_10	8460260	+	G	G	N	A	G	G	G	N	A	G	G	N	A	N	N	A	G	N	G	G	A	A	G	A	A	G	N	G	N	A	G	G	N	R	A	G	G	A	G	A	G
1068	1068	M1068	SCSC-10_GI_10_8	C/T	3	CSC-10_GI_10	8490611	+	C	C	C	T	C	C	C	N	T	C	C	N	T	N	N	T	C	N	C	C	T	T	C	T	T	C	N	C	N	T	C	C	N	Y	T	C	C	T	C	T	C
1069	1069	M1069	SCSC-10_GI_10_8	A/T	3	CSC-10_GI_10	8494649	+	N	A	N	T	A	A	A	N	T	A	A	N	T	N	N	T	A	N	A	A	T	T	A	T	N	A	N	A	N	T	A	A	N	W	T	A	A	T	A	T	A
1070	1070	M1070	SCSC-10_GI_10_8	T/A	3	CSC-10_GI_10	8494651	+	N	T	N	A	T	T	T	N	A	T	T	N	A	N	N	A	T	N	T	T	A	A	T	A	N	T	N	T	N	A	T	T	N	W	A	T	T	A	T	A	T
1071	1071	M1071	SCSC-10_GI_10_8	G/C	3	CSC-10_GI_10	8494672	+	N	G	N	C	G	G	G	N	C	G	G	N	C	N	N	C	G	N	G	G	C	C	G	C	N	G	N	G	N	C	G	G	N	S	C	G	G	C	G	C	G
1072	1072	M1072	SCSC-10_GI_10_8	C/G	3	CSC-10_GI_10	8494708	+	N	C	N	G	C	C	C	N	G	C	C	N	G	N	N	G	C	N	C	C	G	G	C	G	N	C	N	C	N	G	C	C	N	S	G	C	C	G	C	G	C
1073	1073	M1073	SCSC-10_GI_10_8	G/T	3	CSC-10_GI_10	8638652	+	N	G	G	T	G	T	G	N	T	G	G	N	T	N	N	T	G	N	G	G	T	T	G	T	N	G	N	G	N	T	G	G	N	K	T	G	G	T	G	T	G
1074	1074	M1074	SCSC-10_GI_10_8	C/T	3	CSC-10_GI_10	8639104	+	N	C	C	T	C	T	C	N	T	C	C	N	T	N	N	T	C	N	C	C	T	T	C	T	T	C	N	C	N	T	C	C	N	Y	T	C	C	T	C	T	C
1075	1075	M1075	SCSC-10_GI_10_8	A/G	3	CSC-10_GI_10	8639110	+	N	A	A	G	A	G	A	N	G	A	A	N	G	N	N	G	A	N	A	A	G	G	A	G	G	A	N	A	N	G	A	A	N	R	G	A	A	G	A	G	A
1076	1076	M1076	SCSC-10_GI_10_8	G/A	3	CSC-10_GI_10	8639123	+	N	G	G	A	G	A	G	N	A	G	G	N	A	N	N	A	G	N	G	G	A	A	G	A	A	G	N	G	N	A	G	G	N	R	A	G	G	A	G	A	G
1077	1077	M1077	SCSC-10_GI_10_8	T/C	3	CSC-10_GI_10	8639124	+	N	T	T	C	T	C	T	N	C	T	T	N	C	N	N	C	T	N	T	T	C	C	T	C	C	T	N	T	N	C	T	T	N	Y	C	T	T	C	T	C	T
1081	1081	M1081	SCSC-10_GI_10_8	T/C	3	CSC-10_GI_10	8661226	+	N	T	N	C	T	C	T	N	C	N	T	N	C	N	N	C	T	N	T	T	C	C	T	C	N	T	N	T	N	C	T	T	N	Y	C	T	T	C	T	C	T
1082	1082	M1082	SCSC-10_GI_10_8	T/C	3	CSC-10_GI_10	8661232	+	N	T	N	C	T	C	T	N	C	N	T	N	C	N	N	C	T	N	T	T	C	C	T	C	N	T	N	T	N	C	T	T	N	Y	C	T	T	C	T	C	T
1083	1083	M1083	SCSC-10_GI_10_8	G/T	3	CSC-10_GI_10	8661293	+	N	G	N	T	G	T	G	N	T	G	G	N	T	N	N	T	G	N	G	G	T	T	G	T	T	G	N	G	N	T	G	G	N	G	T	G	G	T	G	T	G
1084	1084	M1084	SCSC-10_GI_10_8	G/T	3	CSC-10_GI_10	8685416	+	N	G	G	T	G	T	G	N	T	G	G	N	T	N	N	T	G	N	G	G	T	T	G	T	T	G	N	G	N	T	G	G	N	K	T	G	G	T	G	T	G
1085	1085	M1085	SCSC-10_GI_10_8	C/T	3	CSC-10_GI_10	8685428	+	N	C	C	T	C	T	C	N	T	C	C	N	T	N	N	T	C	N	C	C	T	T	C	T	T	C	N	C	N	T	C	C	N	Y	T	C	C	T	C	T	C
1086	1086	M1086	SCSC-10_GI_10_8	T/C	3	CSC-10_GI_10	8685458	+	N	T	T	C	T	C	T	N	C	T	T	N	C	N	N	C	T	N	T	T	C	C	T	C	C	T	N	T	N	C	T	T	N	Y	C	T	T	C	T	C	T
1087	1087	M1087	SCSC-10_GI_10_8	T/A	3	CSC-10_GI_10	8685464	+	N	T	T	A	T	A	T	N	A	T	T	N	A	N	N	A	T	N	T	T	A	A	T	A	A	T	N	T	N	A	T	T	N	W	A	T	T	A	T	A	T
1088	1088	M1088	SCSC-10_GI_10_8	T/C	3	CSC-10_GI_10	8686833	+	T	T	N	C	T	C	T	N	C	T	T	N	C	N	N	C	T	N	T	T	C	C	T	C	N	T	N	T	N	C	T	T	N	Y	C	T	T	C	T	C	T
1089	1089	M1089	SCSC-10_GI_10_8	T/C	3	CSC-10_GI_10	8686841	+	T	T	N	C	T	C	T	N	C	T	T	N	C	N	N	C	T	N	T	T	C	C	T	C	N	T	N	T	N	C	T	T	N	Y	C	T	T	C	T	C	T
1090	1090	M1090	SCSC-10_GI_10_8	T/C	3	CSC-10_GI_10	8686864	+	T	T	N	C	T	C	T	N	C	T	T	N	C	N	N	C	T	N	T	T	C	C	T	C	N	T	N	T	N	C	T	T	N	Y	C	T	T	C	T	C	T
1091	1091	M1091	SCSC-10_GI_10_8	A/C	3	CSC-10_GI_10	8697458	+	N	A	N	C	A	C	A	N	C	A	A	N	C	N	N	C	A	N	A	A	C	C	A	C	C	A	N	A	N	C	A	A	N	M	C	A	A	C	A	C	A
1092	1092	M1092	SCSC-10_GI_10_8	C/T	3	CSC-10_GI_10	8697467	+	N	C	N	T	C	T	C	N	T	C	C	N	T	N	N	T	C	N	C	C	T	T	C	T	T	C	N	C	N	T	C	C	N	Y	T	C	C	T	C	T	C
1093	1093	M1093	SCSC-10_GI_10_8	A/G	3	CSC-10_GI_10	8697483	+	N	A	N	G	A	G	A	N	G	A	A	N	G	N	N	G	A	N	A	A	G	G	A	G	G	A	N	A	N	G	A	A	N	R	G	A	A	G	A	G	A
1094	1094	M1094	SCSC-10_GI_10_8	C/A	3	CSC-10_GI_10	8697485	+	N	C	N	A	C	A	C	N	A	C	C	N	A	N	N	A	C	N	C	C	A	A	C	A	A	C	N	C	N	A	C	C	N	M	A	C	C	A	C	A	C
1095	1095	M1095	SCSC-10_GI_10_8	A/C	3	CSC-10_GI_10	8701237	+	N	A	N	C	A	C	A	N	C	A	A	N	C	N	N	C	A	N	A	A	C	C	A	C	C	A	N	A	N	C	A	A	N	M	C	A	A	C	A	C	A
1096	1096	M1096	SCSC-10_GI_10_8	T/G	3	CSC-10_GI_10	8798158	+	N	T	N	G	T	G	T	N	G	T	T	N	G	N	N	G	T	N	T	T	G	G	T	G	G	T	N	T	N	G	T	T	N	K	G	T	T	G	T	G	T
1097	1097	M1097	SCSC-10_GI_10_8	C/T	3	CSC-10_GI_10	8806861	+	C	C	N	T	C	T	C	N	T	C	C	N	T	N	N	T	C	N	C	C	T	T	C	T	N	C	N	C	N	T	C	C	N	Y	T	C	C	T	C	T	C
1098	1098	M1098	SCSC-10_GI_10_8	C/T	3	CSC-10_GI_10	8806886	+	C	C	N	T	C	T	C	N	T	C	C	N	T	N	N	T	C	N	C	C	T	T	C	T	T	C	N	C	N	T	C	C	N	Y	T	C	C	T	C	T	C
1099	1099	M1099	SCSC-10_GI_10_8	G/A	3	CSC-10_GI_10	8806909	+	N	G	N	A	G	A	G	N	A	G	G	N	A	N	N	A	G	N	G	G	A	A	G	A	A	G	N	G	N	A	G	G	N	R	A	G	G	A	G	A	G
1100	1100	M1100	SCSC-10_GI_10_8	T/C	3	CSC-10_GI_10	8814655	+	N	T	N	C	T	C	T	N	C	T	T	N	C	N	N	C	T	N	T	T	C	C	T	C	N	T	N	T	N	C	T	T	N	Y	C	T	T	C	T	C	T
1101	1101	M1101	SCSC-10_GI_10_8	G/T	3	CSC-10_GI_10	8822964	+	N	G	N	T	G	T	G	N	T	G	G	N	T	N	N	T	G	N	G	G	T	T	G	T	N	G	N	G	N	T	G	G	N	G	T	G	G	T	G	T	G
1102	1102	M1102	SCSC-10_GI_10_8	T/C	3	CSC-10_GI_10	8822994	+	N	T	N	C	T	C	T	N	C	T	T	N	C	N	N	C	T	N	T	T	C	C	T	C	N	T	N	T	N	C	T	T	N	T	C	T	T	C	T	C	T
1103	1103	M1103	SCSC-10_GI_10_8	T/C	3	CSC-10_GI_10	8888575	+	N	T	N	C	T	C	T	N	C	T	T	N	C	N	N	C	T	N	T	T	C	C	T	C	C	T	N	T	N	C	T	T	N	T	C	T	T	C	T	C	T
1104	1104	M1104	SCSC-10_GI_10_8	G/A	3	CSC-10_GI_10	8934519	+	N	G	N	A	G	A	G	N	A	G	G	N	A	N	N	A	G	N	G	G	A	A	G	A	A	G	N	G	N	A	G	G	N	G	A	G	G	A	G	A	G
1105	1105	M1105	SCSC-10_GI_10_8	C/T	3	CSC-10_GI_10	8934529	+	N	C	N	T	C	T	C	N	T	C	C	N	T	N	N	T	C	N	C	C	T	T	C	T	T	C	N	C	N	T	C	C	N	C	T	C	C	T	C	T	C
1106	1106	M1106	SCSC-10_GI_10_8	T/A	3	CSC-10_GI_10	8934550	+	N	T	N	A	T	A	T	N	A	T	T	N	A	N	N	A	T	N	T	T	A	A	T	A	A	T	N	T	N	A	T	T	N	T	A	T	T	A	T	A	T
1107	1107	M1107	SCSC-10_GI_10_8	T/G	3	CSC-10_GI_10	8934552	+	N	T	N	G	T	G	T	N	G	T	T	N	G	N	N	G	T	N	T	T	G	G	T	G	G	T	N	T	N	G	T	T	N	T	G	T	T	G	T	G	T
1108	1108	M1108	SCSC-10_GI_10_8	A/T	3	CSC-10_GI_10	8934834	+	N	A	N	T	A	T	A	N	T	A	A	N	T	N	N	T	A	N	A	A	T	T	A	T	T	A	N	A	N	T	A	A	N	A	T	A	A	T	A	T	A
1109	1109	M1109	SCSC-10_GI_10_8	A/C	3	CSC-10_GI_10	8934852	+	N	A	N	C	A	C	A	N	C	A	A	N	C	N	N	C	A	N	A	A	C	C	A	C	C	A	N	A	N	C	A	A	N	A	C	A	A	C	A	C	A
1110	1110	M1110	SCSC-10_GI_10_8	C/T	3	CSC-10_GI_10	8934853	+	N	C	N	T	C	T	C	N	T	C	C	N	T	N	N	T	C	N	C	C	T	T	C	T	T	C	N	C	N	T	C	C	N	C	T	C	C	T	C	T	C
1111	1111	M1111	SCSC-10_GI_10_8	G/C	3	CSC-10_GI_10	8936371	+	N	G	N	C	G	C	G	N	C	G	G	N	C	N	N	C	G	N	G	G	C	C	G	C	C	G	N	G	N	C	G	G	N	G	C	G	G	C	G	C	G
1112	1112	M1112	SCSC-10_GI_10_8	C/T	3	CSC-10_GI_10	8939057	+	N	C	N	T	C	T	C	N	T	C	C	N	T	N	N	T	C	N	C	C	T	T	C	T	N	C	N	C	N	T	C	C	N	C	T	C	C	T	C	T	C
1113	1113	M1113	SCSC-10_GI_10_8	G/A	3	CSC-10_GI_10	8939098	+	N	G	N	A	G	A	G	N	A	G	G	N	A	N	N	A	G	N	G	G	A	A	G	A	N	G	N	G	N	A	G	G	N	G	A	G	G	A	G	A	G
1114	1114	M1114	SCSC-10_GI_10_8	C/G	3	CSC-10_GI_10	8939114	+	N	C	N	G	C	G	C	N	G	C	C	N	G	N	N	G	C	N	C	C	G	G	C	G	N	C	N	C	N	G	C	C	N	C	G	C	C	G	C	G	C
1115	1115	M1115	SCSC-10_GI_10_8	A/G	3	CSC-10_GI_10	8939120	+	N	A	N	G	A	G	A	N	G	A	A	N	G	N	N	G	A	N	A	A	G	G	A	G	N	A	N	A	N	G	A	A	N	A	G	A	A	G	A	G	A
1116	1116	M1116	SCSC-10_GI_10_8	G/C	3	CSC-10_GI_10	8939126	+	N	G	N	C	G	C	G	N	C	G	G	N	C	N	N	C	G	N	G	G	C	C	G	C	N	G	N	G	N	C	G	G	N	G	C	G	G	C	G	C	G
1117	1117	M1117	SCSC-10_GI_10_8	A/T	3	CSC-10_GI_10	8944837	+	N	A	N	T	A	T	A	N	T	A	A	N	T	N	N	T	A	N	A	A	T	T	A	T	T	A	N	A	N	T	A	A	N	A	T	A	A	T	A	T	A
1118	1118	M1118	SCSC-10_GI_10_8	C/A	3	CSC-10_GI_10	8984184	+	N	C	N	A	C	A	C	N	A	C	C	N	A	N	N	A	C	N	C	C	A	A	C	A	A	C	N	C	N	A	C	C	N	C	A	C	C	A	C	A	C
1119	1119	M1119	SCSC-10_GI_10_9	C/A	3	CSC-10_GI_10	9058844	+	N	C	N	A	C	C	C	N	A	C	C	N	A	N	N	A	C	N	C	C	A	A	C	A	N	C	N	C	N	A	C	C	N	C	A	C	C	A	M	A	C
1120	1120	M1120	SCSC-10_GI_10_9	A/G	3	CSC-10_GI_10	9059855	+	A	A	N	G	A	A	A	N	G	A	A	N	G	N	N	G	A	N	A	A	G	G	A	G	N	A	N	A	N	G	A	A	N	A	G	A	A	G	R	G	A
1121	1121	M1121	SCSC-10_GI_10_9	C/T	3	CSC-10_GI_10	9061064	+	N	C	N	T	C	C	C	N	T	C	C	N	T	N	N	T	C	N	C	C	T	T	C	T	T	C	N	C	N	T	C	C	N	C	T	C	C	T	Y	T	C
1124	1124	M1124	SCSC-10_GI_10_9	C/T	3	CSC-10_GI_10	9202758	+	N	C	N	T	C	C	C	N	T	C	C	N	T	N	N	T	C	N	C	C	T	T	C	T	N	C	N	C	N	T	C	C	N	C	T	C	C	T	T	T	C
1125	1125	M1125	SCSC-10_GI_10_9	C/T	3	CSC-10_GI_10	9202793	+	N	C	N	T	C	C	C	N	T	C	C	N	T	N	N	T	C	N	C	C	T	T	C	T	N	C	N	C	N	T	C	C	N	C	T	C	C	T	T	T	C
1126	1126	M1126	SCSC-10_GI_10_9	A/G	3	CSC-10_GI_10	9208965	+	N	A	N	G	A	A	A	N	G	A	A	N	G	N	N	G	A	N	A	A	G	G	A	G	G	A	N	A	N	G	A	A	N	A	G	A	A	G	G	G	A
1127	1127	M1127	SCSC-10_GI_10_9	G/C	3	CSC-10_GI_10	9229814	+	N	G	N	C	G	G	G	N	C	G	G	N	C	N	N	C	G	N	G	G	C	C	G	C	C	G	N	G	N	C	G	G	N	G	C	G	G	C	C	C	G
1128	1128	M1128	SCSC-10_GI_10_9	A/T	3	CSC-10_GI_10	9229864	+	N	A	N	T	A	A	A	N	T	A	A	N	T	N	N	T	A	N	A	A	T	T	A	T	T	A	N	A	N	T	A	A	N	A	T	A	A	T	T	T	A
1129	1129	M1129	SCSC-10_GI_10_9	C/A	3	CSC-10_GI_10	9229867	+	N	C	N	A	C	C	C	N	A	C	C	N	A	N	N	A	C	N	C	C	A	A	C	A	A	C	N	C	N	A	C	C	N	C	A	C	C	A	A	A	C
1130	1130	M1130	SCSC-10_GI_10_9	G/A	3	CSC-10_GI_10	9229970	+	N	G	N	A	G	G	G	N	A	G	G	N	A	N	N	A	G	N	G	G	A	A	G	A	A	G	N	G	N	A	G	G	N	G	A	G	G	A	A	A	G
1131	1131	M1131	SCSC-10_GI_10_9	T/C	3	CSC-10_GI_10	9298409	+	N	T	N	C	T	T	T	N	C	T	T	N	C	N	N	C	T	N	T	T	C	C	T	C	C	T	N	T	N	C	T	T	N	T	C	T	T	C	C	C	T
1132	1132	M1132	SCSC-10_GI_10_9	T/C	3	CSC-10_GI_10	9298423	+	N	T	N	C	T	T	T	N	C	T	T	N	C	N	N	C	T	N	T	T	C	C	T	C	C	T	N	T	N	C	T	T	N	T	C	T	T	C	C	C	T
1133	1133	M1133	SCSC-10_GI_10_9	T/C	3	CSC-10_GI_10	9326988	+	T	T	N	C	T	T	T	N	C	T	T	N	C	N	N	C	T	N	T	T	C	C	T	C	N	T	N	T	N	C	T	T	N	T	C	T	T	C	C	C	T
1134	1134	M1134	SCSC-10_GI_10_9	G/T	3	CSC-10_GI_10	9328216	+	N	G	N	T	G	G	G	N	T	G	G	N	T	N	N	T	G	N	G	G	T	T	G	T	N	G	N	G	N	T	G	G	N	G	T	G	G	T	T	T	G
1135	1135	M1135	SCSC-10_GI_10_9	C/T	3	CSC-10_GI_10	9328218	+	N	C	N	T	C	C	C	N	T	C	C	N	T	N	N	T	C	N	C	C	T	T	C	T	N	C	N	C	N	T	C	C	N	C	T	C	C	T	T	T	C
1137	1137	M1137	SCSC-10_GI_10_9	G/C	3	CSC-10_GI_10	9498805	+	N	G	N	C	G	G	G	N	C	G	G	N	G	N	N	C	G	N	G	G	C	C	G	C	S	G	N	G	N	C	G	G	N	G	C	G	G	C	G	C	G
1138	1138	M1138	SCSC-10_GI_10_9	C/G	3	CSC-10_GI_10	9498843	+	N	C	N	G	C	C	C	N	G	C	C	N	C	N	N	G	C	N	C	C	G	G	C	G	S	C	N	C	N	G	C	C	N	C	G	C	C	G	C	G	C
1139	1139	M1139	SCSC-10_GI_10_9	C/A	3	CSC-10_GI_10	9507279	+	N	C	N	A	C	C	C	N	A	C	C	N	C	N	N	A	C	N	C	C	A	A	C	A	C	C	N	C	N	A	C	C	N	C	A	C	C	A	C	A	C
1141	1141	M1141	SCSC-10_GI_10_9	T/A	3	CSC-10_GI_10	9522214	+	N	T	N	A	T	T	T	N	A	T	T	N	T	N	N	A	T	N	T	T	A	A	T	A	N	T	N	T	N	A	T	T	N	T	A	T	T	A	T	A	T
1142	1142	M1142	SCSC-10_GI_10_9	A/G	3	CSC-10_GI_10	9531688	+	N	A	N	G	A	A	A	N	G	A	A	N	A	N	G	G	A	N	A	A	G	G	A	G	A	A	N	A	N	G	A	A	N	A	G	A	A	G	A	G	A
1147	1147	M1147	SCSC-10_GI_10_9	T/C	3	CSC-10_GI_10	9629224	+	N	T	N	C	T	T	T	N	C	T	C	N	T	N	N	C	T	N	T	T	C	C	T	C	N	T	N	T	N	C	T	T	N	T	C	T	T	C	T	C	T
1148	1148	M1148	SCSC-10_GI_10_9	T/C	3	CSC-10_GI_10	9629259	+	N	T	N	C	T	T	T	N	C	T	C	N	T	N	N	C	T	N	T	T	C	C	T	C	N	T	N	T	N	C	T	T	N	T	C	T	T	C	T	C	T
1149	1149	M1149	SCSC-10_GI_10_9	A/G	3	CSC-10_GI_10	9629264	+	N	A	N	G	A	A	A	N	G	A	G	N	A	N	N	G	A	N	A	A	G	G	A	G	N	A	N	A	N	G	A	A	N	A	G	A	A	G	A	G	A
1150	1150	M1150	SCSC-10_GI_10_9	A/T	3	CSC-10_GI_10	9629270	+	N	A	N	T	A	A	A	N	T	A	T	N	A	N	N	T	A	N	A	A	T	T	A	T	N	A	N	A	N	T	A	A	N	A	T	A	A	T	A	T	A
1151	1151	M1151	SCSC-10_GI_10_9	G/T	3	CSC-10_GI_10	9629343	+	N	G	N	T	G	G	G	N	T	G	T	N	G	N	N	T	G	N	G	G	T	T	G	T	G	G	N	G	N	T	G	G	N	G	T	G	G	T	G	T	G
1152	1152	M1152	SCSC-10_GI_10_9	A/C	3	CSC-10_GI_10	9691721	+	N	A	N	C	A	A	A	N	C	A	C	N	A	N	N	C	A	N	A	A	C	C	A	C	A	A	N	A	N	C	A	C	A	A	C	A	A	C	A	C	A
1153	1153	M1153	SCSC-10_GI_10_9	A/G	3	CSC-10_GI_10	9798261	+	A	A	A	G	A	A	A	N	G	A	G	N	A	N	N	G	A	N	A	A	A	G	A	G	A	A	N	A	N	G	R	G	N	A	G	A	A	G	A	G	A
1154	1154	M1154	SCSC-10_GI_10_9	A/G	3	CSC-10_GI_10	9798285	+	A	A	A	G	A	A	A	N	G	A	G	N	A	N	N	G	A	N	A	A	A	G	A	G	A	A	N	A	N	G	R	G	N	A	G	A	A	G	A	G	A
1155	1155	M1155	SCSC-10_GI_10_9	G/A	3	CSC-10_GI_10	9798393	+	G	G	N	A	G	G	G	N	A	G	A	N	G	N	N	A	G	N	G	G	G	A	G	A	G	G	N	G	N	A	R	A	N	G	A	G	G	A	G	A	G
1156	1156	M1156	SCSC-10_GI_10_9	G/A	3	CSC-10_GI_10	9798631	+	N	G	N	A	G	G	G	N	A	G	A	N	G	N	N	A	G	N	G	G	G	A	G	A	G	G	N	G	N	A	R	A	N	G	A	G	G	A	G	A	G
1160	1160	M1160	SCSC-10_GI_10_9	C/T	3	CSC-10_GI_10	9798721	+	N	C	N	T	C	C	C	N	T	C	T	N	C	N	N	T	C	N	C	C	C	T	C	T	N	C	N	C	N	T	Y	T	N	C	T	C	C	T	C	T	C
1161	1161	M1161	SCSC-10_GI_10_9	A/G	3	CSC-10_GI_10	9798737	+	N	A	N	G	A	A	A	N	G	A	G	N	A	N	N	G	A	N	A	A	A	G	A	G	N	A	N	A	N	G	R	G	N	A	G	A	A	G	A	G	A
1162	1162	M1162	SCSC-10_GI_10_9	G/A	3	CSC-10_GI_10	9800843	+	N	G	N	A	G	G	G	N	A	G	A	N	G	N	N	A	G	N	G	G	G	A	G	A	N	G	N	G	N	A	R	A	N	G	A	G	G	A	G	A	G
1163	1163	M1163	SCSC-10_GI_10_9	A/C	3	CSC-10_GI_10	9809024	+	N	A	N	C	A	A	A	N	C	A	C	N	A	N	N	C	A	N	A	A	A	C	A	C	A	A	N	A	N	C	M	C	N	A	C	A	A	C	A	C	A
1164	1164	M1164	SCSC-10_GI_10_9	T/G	3	CSC-10_GI_10	9809050	+	N	T	N	G	T	T	T	N	G	T	G	N	T	N	N	G	T	N	T	T	T	G	T	G	T	T	N	T	N	G	K	G	N	T	G	T	T	G	T	G	T
1165	1165	M1165	SCSC-10_GI_10_9	G/T	3	CSC-10_GI_10	9809150	+	N	G	G	T	G	G	G	N	T	G	T	N	G	N	N	T	G	N	G	G	G	T	G	T	G	G	N	G	N	T	K	T	N	G	T	G	G	T	G	T	G
1166	1166	M1166	SCSC-10_GI_10_9	T/C	3	CSC-10_GI_10	9809178	+	N	T	T	C	T	T	T	N	C	T	C	N	T	N	N	C	T	N	T	T	T	C	T	C	T	T	N	T	N	C	Y	C	N	T	C	T	T	C	T	C	T
1167	1167	M1167	SCSC-10_GI_10_9	G/C	3	CSC-10_GI_10	9809215	+	G	G	N	C	G	G	G	N	C	G	C	N	G	N	N	C	G	N	G	G	G	C	G	C	N	G	N	G	N	C	S	C	N	G	C	G	G	C	G	C	G
1168	1168	M1168	SCSC-10_GI_10_9	T/C	3	CSC-10_GI_10	9815162	+	N	T	N	C	T	T	T	N	C	T	C	N	T	N	N	C	T	N	T	T	T	C	T	C	T	T	N	T	N	C	Y	C	N	T	C	T	T	C	T	C	T
1171	1171	M1171	SCSC-10_GI_10_9	C/T	3	CSC-10_GI_10	9820136	+	N	C	N	T	C	C	C	N	T	C	T	N	C	N	N	T	C	N	C	C	C	T	C	T	N	C	N	C	N	T	Y	T	N	C	T	C	C	T	C	T	C
1172	1172	M1172	SCSC-10_GI_10_9	A/C	3	CSC-10_GI_10	9855679	+	N	A	N	C	A	A	A	N	C	A	C	N	A	N	N	C	A	N	A	A	A	C	A	C	A	A	N	A	N	C	M	C	A	A	C	A	A	C	A	C	A
1177	1177	M1177	SCSC-10_GI_10_9	G/A	3	CSC-10_GI_10	9907427	+	G	G	N	A	G	G	A	N	A	G	A	N	G	N	N	A	G	N	G	G	G	A	G	A	G	G	N	A	N	A	R	A	N	G	A	G	G	A	G	A	G
1178	1178	M1178	SCSC-10_GI_10_9	T/G	3	CSC-10_GI_10	9907437	+	T	T	N	G	T	T	G	N	G	T	G	N	T	N	N	G	T	N	T	T	T	G	T	G	T	T	N	G	N	G	K	G	N	T	G	T	T	G	T	G	T
1179	1179	M1179	SCSC-10_GI_10_9	C/T	3	CSC-10_GI_10	9907458	+	C	C	N	T	C	C	T	N	T	C	T	N	C	N	N	T	C	N	C	C	C	T	C	T	C	C	N	T	N	T	Y	T	N	C	T	C	C	T	C	T	C
1182	1182	M1182	SCSC-10_GI_10_9	A/G	3	CSC-10_GI_10	9913014	+	N	A	N	G	A	A	G	N	G	A	G	N	A	N	N	G	A	N	A	A	A	G	A	G	N	A	N	G	N	G	R	G	N	A	G	A	A	G	A	G	A
1183	1183	M1183	SCSC-10_GI_10_9	A/T	3	CSC-10_GI_10	9932935	+	N	A	N	T	A	A	T	N	T	A	T	N	A	N	N	T	A	N	N	A	A	T	A	T	A	A	N	T	N	N	W	T	N	A	T	A	A	T	A	T	A
1184	1184	M1184	SCSC-10_GI_10_9	T/C	3	CSC-10_GI_10	9934682	+	T	T	N	C	T	T	C	N	C	T	C	N	T	N	N	C	T	N	T	T	T	C	T	C	N	T	N	C	N	C	Y	C	N	T	C	T	T	C	T	C	T
1185	1185	M1185	SCSC-10_GI_10_9	G/T	3	CSC-10_GI_10	9934685	+	G	G	N	T	G	G	T	N	T	G	T	N	G	N	N	T	G	N	G	G	G	T	G	T	N	G	N	T	N	T	K	T	N	G	T	G	G	T	G	T	G
1186	1186	M1186	SCSC-10_GI_10_9	C/T	3	CSC-10_GI_10	9934691	+	C	C	N	T	C	C	T	N	T	C	T	N	C	N	N	T	C	N	C	C	C	T	C	T	N	C	N	T	N	T	Y	T	N	C	T	C	C	T	C	T	C
1187	1187	M1187	SCSC-10_GI_10_9	C/A	3	CSC-10_GI_10	9934692	+	C	C	N	A	C	C	A	N	A	C	A	N	C	N	N	A	C	N	C	C	C	A	C	A	N	C	N	A	N	A	M	A	N	C	A	C	C	A	C	A	C
1188	1188	M1188	SCSC-10_GI_10_9	G/A	3	CSC-10_GI_10	9938820	+	G	G	N	A	G	G	A	N	A	G	A	N	G	N	N	A	G	N	G	G	G	A	G	A	G	G	N	A	N	A	R	A	N	G	A	G	G	A	G	A	G
1191	1191	M1191	SCSC-10_GI_10_9	A/C	3	CSC-10_GI_10	9970309	+	N	C	N	C	A	A	C	N	C	A	C	N	A	N	N	C	A	N	A	A	A	C	A	C	A	A	N	C	N	C	C	C	N	A	C	A	A	C	A	C	A
1193	1193	M1193	SCSC-10_GI_10_9	C/T	3	CSC-10_GI_10	9988508	+	N	T	N	T	C	C	T	N	T	C	T	N	C	N	N	T	C	N	C	C	C	T	C	T	C	C	N	T	N	T	T	T	N	C	T	C	C	T	C	T	C
1194	1194	M1194	SCSC-10_GI_10_9	T/G	3	CSC-10_GI_10	9999837	+	N	G	N	G	T	T	G	N	G	T	G	N	T	N	N	G	T	N	T	T	T	G	T	G	T	T	N	G	N	G	G	G	T	T	G	T	T	G	T	G	T
1195	1195	M1195	SCSC-11_GI_6_1=	G/A	3	CSC-11_GI_6_1=SCAFFOLD_1954=GI_6_2=SCAFFOLD_2053=GI_6_3	67924	+	N	A	N	G	R	G	A	N	A	A	G	N	G	N	N	A	G	N	G	G	A	A	G	G	A	G	N	A	N	G	G	G	N	A	G	A	G	G	A	G	A
1197	1197	M1197	SCSC-11_GI_6_1=	G/A	3	CSC-11_GI_6_1=SCAFFOLD_1954=GI_6_2=SCAFFOLD_2053=GI_6_3	89493	+	N	A	N	G	R	G	A	N	A	A	G	N	G	N	N	A	G	N	G	G	A	A	R	G	A	G	N	A	N	G	G	G	N	A	G	A	G	G	A	G	A
1198	1198	M1198	SCSC-11_GI_6_1=	C/G	3	CSC-11_GI_6_1=SCAFFOLD_1954=GI_6_2=SCAFFOLD_2053=GI_6_3	100714	+	G	G	N	C	S	C	G	N	G	G	C	N	C	N	N	G	C	N	C	C	G	G	S	C	G	C	N	G	N	C	C	C	N	G	C	G	C	C	G	C	G
1199	1199	M1199	SCSC-11_GI_6_1=	C/T	3	CSC-11_GI_6_1=SCAFFOLD_1954=GI_6_2=SCAFFOLD_2053=GI_6_3	111751	+	N	T	N	C	Y	C	T	N	T	N	C	N	C	N	N	T	C	N	C	C	T	T	Y	C	N	C	N	T	N	C	C	C	N	T	C	T	C	C	T	C	T
1200	1200	M1200	SCSC-11_GI_6_1=	G/A	3	CSC-11_GI_6_1=SCAFFOLD_1954=GI_6_2=SCAFFOLD_2053=GI_6_3	135815	+	N	A	N	G	R	G	A	N	A	A	G	N	G	N	N	A	G	N	G	G	A	A	G	G	N	G	N	A	N	G	G	G	N	A	G	A	G	G	A	G	A
1201	1201	M1201	SCSC-11_GI_6_1=	T/G	3	CSC-11_GI_6_1=SCAFFOLD_1954=GI_6_2=SCAFFOLD_2053=GI_6_3	135822	+	N	G	N	T	K	T	G	N	G	G	T	N	T	N	N	G	T	N	T	T	G	G	T	T	N	T	N	G	N	T	T	T	N	G	T	G	T	T	G	T	G
1202	1202	M1202	SCSC-11_GI_6_1=	A/T	3	CSC-11_GI_6_1=SCAFFOLD_1954=GI_6_2=SCAFFOLD_2053=GI_6_3	168802	+	N	T	N	A	W	A	T	N	T	T	A	N	A	N	N	T	A	N	A	A	T	T	W	A	T	A	N	T	N	A	A	A	N	T	A	T	A	A	T	A	T
1203	1203	M1203	SCSC-11_GI_6_1=	T/C	3	CSC-11_GI_6_1=SCAFFOLD_1954=GI_6_2=SCAFFOLD_2053=GI_6_3	170638	+	N	C	N	T	Y	T	C	N	C	C	T	N	T	N	N	C	T	N	T	T	C	C	T	T	N	T	N	C	N	T	T	T	N	C	T	C	T	T	C	T	C
1204	1204	M1204	SCSC-11_GI_6_1=	G/T	3	CSC-11_GI_6_1=SCAFFOLD_1954=GI_6_2=SCAFFOLD_2053=GI_6_3	233629	+	N	T	N	G	K	G	T	N	T	T	G	N	G	N	N	T	G	N	G	G	T	T	G	G	T	G	N	T	N	G	G	G	N	T	G	T	G	G	T	G	T
1205	1205	M1205	SCSC-11_GI_6_1=	A/G	3	CSC-11_GI_6_1=SCAFFOLD_1954=GI_6_2=SCAFFOLD_2053=GI_6_3	261127	+	N	G	N	A	R	A	G	N	G	G	A	N	A	N	N	G	A	N	A	A	G	G	R	A	N	A	N	G	N	A	A	A	N	G	A	G	A	A	G	A	G
1206	1206	M1206	SCSC-11_GI_6_1=	T/G	3	CSC-11_GI_6_1=SCAFFOLD_1954=GI_6_2=SCAFFOLD_2053=GI_6_3	261128	+	N	G	N	T	K	T	G	N	G	G	T	N	T	N	N	G	T	N	T	T	G	G	K	T	N	T	N	G	N	T	T	T	N	G	T	G	T	T	G	T	G
1207	1207	M1207	SCSC-11_GI_6_1=	G/A	3	CSC-11_GI_6_1=SCAFFOLD_1954=GI_6_2=SCAFFOLD_2053=GI_6_3	261163	+	N	A	N	G	R	G	A	N	A	A	G	N	G	N	N	A	G	N	G	G	A	A	G	G	N	G	N	A	N	G	G	G	N	A	G	A	G	G	A	G	A
1208	1208	M1208	SCSC-11_GI_6_1=	T/A	3	CSC-11_GI_6_1=SCAFFOLD_1954=GI_6_2=SCAFFOLD_2053=GI_6_3	261188	+	N	A	N	T	W	T	A	N	A	A	T	N	T	N	N	A	T	N	T	T	A	A	T	T	N	T	N	A	N	T	T	T	N	A	T	A	T	T	A	T	A
1209	1209	M1209	SCSC-11_GI_6_1=	T/G	3	CSC-11_GI_6_1=SCAFFOLD_1954=GI_6_2=SCAFFOLD_2053=GI_6_3	264015	+	N	G	N	T	K	T	G	N	G	G	T	N	T	N	N	G	T	N	T	T	G	G	K	T	G	T	N	G	N	T	T	T	N	G	T	G	T	T	G	T	G
1210	1210	M1210	SCSC-11_GI_6_1=	G/A	3	CSC-11_GI_6_1=SCAFFOLD_1954=GI_6_2=SCAFFOLD_2053=GI_6_3	264025	+	N	A	N	G	R	G	A	N	A	A	G	N	G	N	N	A	G	N	G	G	A	A	R	G	A	G	N	A	N	G	G	G	N	A	G	A	G	G	A	G	A
1211	1211	M1211	SCSC-11_GI_6_1=	A/G	3	CSC-11_GI_6_1=SCAFFOLD_1954=GI_6_2=SCAFFOLD_2053=GI_6_3	264034	+	N	G	N	A	R	A	G	N	G	G	A	N	A	N	N	G	A	N	A	A	G	G	R	A	G	A	N	G	N	A	A	A	N	G	A	G	A	A	G	A	G
1212	1212	M1212	SCSC-11_GI_6_1=	G/T	3	CSC-11_GI_6_1=SCAFFOLD_1954=GI_6_2=SCAFFOLD_2053=GI_6_3	273300	+	N	T	N	G	K	G	T	N	T	T	G	N	G	N	N	T	G	N	G	G	T	T	G	G	N	G	N	T	N	G	G	G	N	T	G	T	G	G	T	G	T
1213	1213	M1213	SCSC-11_GI_6_1=	A/C	3	CSC-11_GI_6_1=SCAFFOLD_1954=GI_6_2=SCAFFOLD_2053=GI_6_3	277605	+	C	C	N	A	C	A	C	N	C	C	A	N	A	N	N	C	A	N	A	A	C	C	A	A	C	A	N	C	N	A	A	A	N	C	A	C	A	A	C	A	C
1214	1214	M1214	SCSC-11_GI_6_1=	T/C	3	CSC-11_GI_6_1=SCAFFOLD_1954=GI_6_2=SCAFFOLD_2053=GI_6_3	277641	+	C	C	N	T	C	T	C	N	C	C	T	N	T	N	N	C	T	N	T	T	C	C	T	T	C	T	N	C	N	T	T	T	N	C	T	C	T	T	C	T	C
1215	1215	M1215	SCSC-11_GI_6_1=	T/A	3	CSC-11_GI_6_1=SCAFFOLD_1954=GI_6_2=SCAFFOLD_2053=GI_6_3	279605	+	N	A	N	T	W	T	A	N	A	A	T	N	T	N	N	A	T	N	T	T	A	A	W	T	A	T	N	A	N	T	T	T	T	A	T	A	T	T	A	T	A
1221	1221	M1221	SCSC-11_GI_6_1=	T/C	3	CSC-11_GI_6_1=SCAFFOLD_1954=GI_6_2=SCAFFOLD_2053=GI_6_3	295843	+	N	C	N	T	Y	T	C	N	C	C	T	N	T	N	N	C	T	N	T	T	C	C	T	T	C	T	N	C	N	T	T	T	N	C	T	C	T	T	C	T	C
1222	1222	M1222	SCSC-11_GI_6_1=	A/G	3	CSC-11_GI_6_1=SCAFFOLD_1954=GI_6_2=SCAFFOLD_2053=GI_6_3	332592	+	N	G	N	A	R	A	G	N	G	G	A	N	A	N	N	G	A	N	A	A	G	G	A	A	N	A	N	G	N	A	A	A	N	G	A	G	A	A	G	A	G
1223	1223	M1223	SCSC-11_GI_6_1=	A/C	3	CSC-11_GI_6_1=SCAFFOLD_1954=GI_6_2=SCAFFOLD_2053=GI_6_3	332597	+	N	C	N	A	M	A	C	N	C	C	A	N	A	N	N	C	A	N	A	A	C	C	A	A	N	A	N	C	N	A	A	A	N	C	A	C	A	A	C	A	C
1224	1224	M1224	SCSC-11_GI_6_1=	T/C	3	CSC-11_GI_6_1=SCAFFOLD_1954=GI_6_2=SCAFFOLD_2053=GI_6_3	341323	+	N	C	N	T	Y	T	C	N	C	C	T	N	T	N	N	C	T	N	T	T	C	C	T	T	C	T	N	C	N	T	T	T	N	C	T	C	T	T	C	T	C
1227	1227	M1227	SCSC-11_GI_6_1=	A/C	3	CSC-11_GI_6_1=SCAFFOLD_1954=GI_6_2=SCAFFOLD_2053=GI_6_3	872907	+	N	C	N	A	C	A	C	N	C	C	A	N	A	N	N	A	A	N	A	A	C	C	A	A	C	A	N	C	N	C	A	A	N	C	A	C	A	C	C	C	C
1228	1228	M1228	SCSC-11_GI_6_1=	A/C	3	CSC-11_GI_6_1=SCAFFOLD_1954=GI_6_2=SCAFFOLD_2053=GI_6_3	872912	+	N	C	N	A	C	A	C	N	C	C	A	N	A	N	N	A	A	N	A	A	C	C	A	A	N	A	N	C	N	C	A	A	N	C	A	C	A	C	C	C	C
1229	1229	M1229	SCSC-11_GI_6_1=	A/G	3	CSC-11_GI_6_1=SCAFFOLD_1954=GI_6_2=SCAFFOLD_2053=GI_6_3	872919	+	N	G	N	A	G	A	G	N	G	G	A	N	A	N	N	A	A	N	A	A	G	G	A	A	N	A	N	G	N	G	A	A	N	G	A	G	A	G	G	G	G
1230	1230	M1230	SCSC-11_GI_6_1=	T/C	3	CSC-11_GI_6_1=SCAFFOLD_1954=GI_6_2=SCAFFOLD_2053=GI_6_3	957266	+	N	C	N	T	C	T	C	N	C	C	T	N	T	N	N	T	T	N	T	T	C	C	T	T	C	T	N	C	N	C	T	T	N	C	T	C	T	C	C	C	C
1231	1231	M1231	SCSC-11_GI_6_1=	C/T	3	CSC-11_GI_6_1=SCAFFOLD_1954=GI_6_2=SCAFFOLD_2053=GI_6_3	982853	+	N	T	N	C	T	C	T	N	T	T	C	N	C	N	N	C	C	N	C	C	T	T	C	C	T	C	N	T	N	T	C	C	N	T	C	T	C	T	T	T	T
1232	1232	M1232	SCSC-11_GI_6_1=	A/G	3	CSC-11_GI_6_1=SCAFFOLD_1954=GI_6_2=SCAFFOLD_2053=GI_6_3	1030648	+	N	G	N	A	G	A	G	N	G	G	A	N	A	N	N	G	A	N	A	A	G	G	A	A	G	A	N	G	N	G	A	A	N	G	A	G	A	G	G	G	G
1233	1233	M1233	SCSC-11_GI_6_1=	C/T	3	CSC-11_GI_6_1=SCAFFOLD_1954=GI_6_2=SCAFFOLD_2053=GI_6_3	1046439	+	N	T	C	C	T	C	T	N	T	T	C	N	C	N	N	T	C	N	C	C	T	T	C	C	T	C	N	T	N	T	C	C	N	T	C	T	C	T	T	T	T
1234	1234	M1234	SCSC-11_GI_6_1=	T/G	3	CSC-11_GI_6_1=SCAFFOLD_1954=GI_6_2=SCAFFOLD_2053=GI_6_3	1069176	+	N	G	T	T	G	T	G	N	G	G	T	N	T	N	N	G	T	N	T	T	G	G	T	T	G	T	N	G	N	G	T	T	N	G	T	G	T	G	G	G	G
1235	1235	M1235	SCSC-11_GI_6_1=	A/G	3	CSC-11_GI_6_1=SCAFFOLD_1954=GI_6_2=SCAFFOLD_2053=GI_6_3	1077456	+	N	G	N	A	G	A	G	N	G	G	A	N	A	N	N	G	N	N	A	A	G	G	A	A	G	A	N	G	N	G	A	A	N	G	A	G	A	G	G	G	G
1236	1236	M1236	SCSC-11_GI_6_1=	T/C	3	CSC-11_GI_6_1=SCAFFOLD_1954=GI_6_2=SCAFFOLD_2053=GI_6_3	1077467	+	N	C	N	T	C	T	C	N	C	C	T	N	T	N	N	C	N	N	T	T	C	C	T	T	C	T	N	C	N	C	T	T	N	C	T	C	T	C	C	C	C
1237	1237	M1237	SCSC-11_GI_6_1=	G/A	3	CSC-11_GI_6_1=SCAFFOLD_1954=GI_6_2=SCAFFOLD_2053=GI_6_3	1077641	+	N	A	N	G	A	G	A	N	A	A	G	N	G	N	N	A	G	N	G	G	A	A	G	G	N	G	N	A	N	A	G	G	N	A	G	A	G	A	A	A	A
1238	1238	M1238	SCSC-11_GI_6_1=	G/C	3	CSC-11_GI_6_1=SCAFFOLD_1954=GI_6_2=SCAFFOLD_2053=GI_6_3	1306782	+	N	C	N	G	C	G	G	N	C	G	C	N	G	N	N	C	G	N	C	G	C	C	G	G	N	G	N	C	N	C	G	G	N	G	G	C	G	C	C	C	C
1239	1239	M1239	SCSC-11_GI_6_1=	A/C	3	CSC-11_GI_6_1=SCAFFOLD_1954=GI_6_2=SCAFFOLD_2053=GI_6_3	1306792	+	N	C	N	A	C	A	A	N	C	A	C	N	A	N	N	C	A	N	C	A	C	C	A	A	N	A	N	C	N	C	A	A	N	A	A	C	A	C	C	C	C
1240	1240	M1240	SCSC-11_GI_6_1=	G/C	3	CSC-11_GI_6_1=SCAFFOLD_1954=GI_6_2=SCAFFOLD_2053=GI_6_3	1306820	+	N	C	N	G	C	G	G	N	C	G	C	N	G	N	N	C	G	N	C	G	C	C	G	G	N	G	N	C	N	C	G	G	N	G	G	C	G	C	C	C	C
1241	1241	M1241	SCSC-11_GI_6_1=	A/T	3	CSC-11_GI_6_1=SCAFFOLD_1954=GI_6_2=SCAFFOLD_2053=GI_6_3	1313107	+	N	T	N	A	T	A	A	N	T	A	T	N	A	N	N	T	A	N	T	A	T	T	A	A	T	A	N	T	N	T	A	A	N	A	A	T	A	T	T	T	T
1242	1242	M1242	SCSC-11_GI_6_1=	C/T	3	CSC-11_GI_6_1=SCAFFOLD_1954=GI_6_2=SCAFFOLD_2053=GI_6_3	1405648	+	T	T	N	C	T	C	C	N	T	C	T	N	C	N	N	T	C	N	T	C	T	T	C	C	T	C	N	T	N	T	C	C	N	C	C	T	C	T	T	T	T
1243	1243	M1243	SCSC-11_GI_6_1=	T/G	3	CSC-11_GI_6_1=SCAFFOLD_1954=GI_6_2=SCAFFOLD_2053=GI_6_3	1405656	+	G	G	N	T	G	T	T	N	G	T	G	N	T	N	N	G	T	N	G	T	G	G	T	T	G	T	N	G	N	G	T	T	N	T	T	G	T	G	G	G	G
1244	1244	M1244	SCSC-11_GI_6_1=	G/A	3	CSC-11_GI_6_1=SCAFFOLD_1954=GI_6_2=SCAFFOLD_2053=GI_6_3	1405676	+	A	A	N	G	A	G	G	N	A	G	A	N	G	N	N	A	G	N	A	G	A	A	G	G	A	G	N	A	N	A	G	G	N	G	G	A	G	A	A	A	A
1245	1245	M1245	SCSC-11_GI_6_1=	C/T	3	CSC-11_GI_6_1=SCAFFOLD_1954=GI_6_2=SCAFFOLD_2053=GI_6_3	1405694	+	N	T	N	C	T	C	C	N	T	C	T	N	C	N	N	T	C	N	T	C	T	T	C	C	T	C	N	T	N	T	C	C	N	C	C	T	C	T	T	T	T
1246	1246	M1246	SCSC-11_GI_6_1=	C/G	3	CSC-11_GI_6_1=SCAFFOLD_1954=GI_6_2=SCAFFOLD_2053=GI_6_3	1405697	+	N	G	N	C	G	C	C	N	G	C	G	N	C	N	N	G	C	N	G	C	G	G	C	C	G	C	N	G	N	G	C	C	N	C	C	G	C	G	G	G	G
1247	1247	M1247	SCSC-11_GI_6_1=	G/C	3	CSC-11_GI_6_1=SCAFFOLD_1954=GI_6_2=SCAFFOLD_2053=GI_6_3	1413745	+	N	C	N	G	C	G	G	N	C	G	C	N	G	N	N	C	G	N	C	G	C	C	G	G	C	G	N	C	N	C	G	G	N	G	G	C	G	C	C	C	C
1248	1248	M1248	SCSC-11_GI_6_1=	C/T	3	CSC-11_GI_6_1=SCAFFOLD_1954=GI_6_2=SCAFFOLD_2053=GI_6_3	1413957	+	N	T	N	C	T	C	C	N	T	C	T	N	C	N	N	T	C	N	T	C	T	T	C	C	N	C	N	T	N	T	C	C	N	C	C	T	C	T	T	T	T
1249	1249	M1249	SCSC-11_GI_6_1=	A/G	3	CSC-11_GI_6_1=SCAFFOLD_1954=GI_6_2=SCAFFOLD_2053=GI_6_3	1533678	+	N	G	N	A	G	A	A	N	G	A	G	N	A	N	N	G	A	N	G	A	G	G	A	A	G	A	N	G	N	G	A	A	N	A	A	G	A	G	G	G	G
1250	1250	M1250	SCSC-11_GI_6_1=	T/C	3	CSC-11_GI_6_1=SCAFFOLD_1954=GI_6_2=SCAFFOLD_2053=GI_6_3	1552467	+	N	C	N	T	C	T	T	N	C	T	C	N	T	N	N	C	T	N	C	T	C	C	T	T	C	T	N	C	N	C	T	T	N	T	T	C	T	C	C	C	C
1254	1254	M1254	SCSC-11_GI_6_1=	A/T	3	CSC-11_GI_6_1=SCAFFOLD_1954=GI_6_2=SCAFFOLD_2053=GI_6_3	1707371	+	N	T	N	A	A	A	A	N	T	A	T	N	A	N	N	T	A	N	T	A	T	T	T	T	N	A	N	T	N	T	A	A	N	A	A	T	A	T	T	T	T
1255	1255	M1255	SCSC-11_GI_6_1=	T/C	3	CSC-11_GI_6_1=SCAFFOLD_1954=GI_6_2=SCAFFOLD_2053=GI_6_3	1707372	+	N	C	N	T	T	T	T	N	C	T	C	N	T	N	N	C	T	N	C	T	C	C	C	C	N	T	N	C	N	C	T	T	N	T	T	C	T	C	C	C	C
1256	1256	M1256	SCSC-11_GI_6_1=	G/A	3	CSC-11_GI_6_1=SCAFFOLD_1954=GI_6_2=SCAFFOLD_2053=GI_6_3	1717557	+	N	A	N	G	G	G	G	N	A	G	A	N	G	N	N	A	G	N	A	G	A	A	A	A	A	G	N	A	N	A	G	G	N	G	G	A	G	A	A	A	A
1257	1257	M1257	SCSC-11_GI_6_1=	T/A	3	CSC-11_GI_6_1=SCAFFOLD_1954=GI_6_2=SCAFFOLD_2053=GI_6_3	1717589	+	N	A	N	T	T	T	T	N	A	T	A	N	T	N	N	A	T	N	A	T	A	A	A	A	A	T	N	A	N	A	T	T	N	T	T	A	T	A	A	A	A
1258	1258	M1258	SCSC-11_GI_6_1=	G/A	3	CSC-11_GI_6_1=SCAFFOLD_1954=GI_6_2=SCAFFOLD_2053=GI_6_3	1717594	+	N	A	N	G	G	G	G	N	A	G	A	N	G	N	N	A	G	N	A	G	A	A	A	A	A	G	N	A	N	A	G	G	N	G	G	A	G	A	A	A	A
1259	1259	M1259	SCSC-11_GI_6_1=	A/T	3	CSC-11_GI_6_1=SCAFFOLD_1954=GI_6_2=SCAFFOLD_2053=GI_6_3	1717659	+	N	T	N	A	A	A	A	N	T	A	T	N	A	N	N	T	A	N	T	A	T	T	T	T	N	A	N	T	N	T	A	A	N	A	A	T	A	T	T	T	T
1260	1260	M1260	SCSC-11_GI_6_1=	T/G	3	CSC-11_GI_6_1=SCAFFOLD_1954=GI_6_2=SCAFFOLD_2053=GI_6_3	1773029	+	N	G	N	T	T	T	T	N	G	T	G	N	T	N	N	G	T	N	G	T	G	G	G	G	N	T	N	G	N	G	T	T	N	T	T	G	T	G	G	G	G
1262	1262	M1262	SCSC-11_GI_6_1=	G/T	3	CSC-11_GI_6_1=SCAFFOLD_1954=GI_6_2=SCAFFOLD_2053=GI_6_3	1824384	+	N	T	G	G	G	G	G	N	T	G	T	N	G	N	N	T	G	N	T	G	T	T	T	T	T	G	N	T	N	T	G	G	N	G	G	T	G	T	T	T	T
1263	1263	M1263	SCSC-11_GI_6_1=	C/T	3	CSC-11_GI_6_1=SCAFFOLD_1954=GI_6_2=SCAFFOLD_2053=GI_6_3	1824411	+	N	T	C	C	C	C	C	N	T	C	T	N	C	N	N	T	C	N	T	C	T	T	T	T	T	C	N	T	N	T	C	C	N	C	C	T	C	T	T	T	T
1264	1264	M1264	SCSC-11_GI_6_1=	G/A	3	CSC-11_GI_6_1=SCAFFOLD_1954=GI_6_2=SCAFFOLD_2053=GI_6_3	1871688	+	N	A	N	G	G	G	A	N	A	G	A	N	G	N	N	A	G	N	A	G	A	A	A	A	A	G	N	A	N	A	G	G	N	G	G	A	G	A	A	A	A
1265	1265	M1265	SCSC-11_GI_6_1=	C/T	3	CSC-11_GI_6_1=SCAFFOLD_1954=GI_6_2=SCAFFOLD_2053=GI_6_3	1882433	+	N	T	N	C	C	C	T	N	T	C	T	N	C	N	N	T	C	N	T	C	T	T	T	T	T	C	N	T	N	T	C	C	N	C	C	T	C	T	T	T	T
1266	1266	M1266	SCSC-11_GI_6_1=	C/T	3	CSC-11_GI_6_1=SCAFFOLD_1954=GI_6_2=SCAFFOLD_2053=GI_6_3	1903067	+	N	T	C	C	C	C	T	N	T	C	T	N	C	N	N	T	C	N	T	C	T	T	T	T	T	C	N	T	N	T	C	C	N	C	C	T	C	T	T	T	T
1267	1267	M1267	SCSC-11_GI_6_1=	C/T	3	CSC-11_GI_6_1=SCAFFOLD_1954=GI_6_2=SCAFFOLD_2053=GI_6_3	1903094	+	N	T	C	C	C	C	T	N	T	C	T	N	C	N	N	T	C	N	T	C	T	T	T	T	T	C	N	T	N	T	C	C	N	C	C	T	C	T	T	T	T
1271	1271	M1271	SCSC-11_GI_6_1=	T/C	3	CSC-11_GI_6_1=SCAFFOLD_1954=GI_6_2=SCAFFOLD_2053=GI_6_3	1906962	+	N	C	N	T	T	T	C	N	C	T	C	N	T	N	N	C	T	N	C	T	C	C	C	C	C	T	N	C	N	C	T	T	N	T	T	C	T	C	C	C	C
1272	1272	M1272	SCSC-11_GI_6_1=	C/G	3	CSC-11_GI_6_1=SCAFFOLD_1954=GI_6_2=SCAFFOLD_2053=GI_6_3	1906991	+	N	G	N	C	C	C	G	N	G	C	G	N	C	N	N	G	C	N	G	C	G	G	G	G	G	C	N	G	N	G	C	C	N	C	C	G	C	G	G	G	G
1273	1273	M1273	SCSC-11_GI_6_1=	T/C	3	CSC-11_GI_6_1=SCAFFOLD_1954=GI_6_2=SCAFFOLD_2053=GI_6_3	1907074	+	N	C	N	T	T	T	C	N	C	T	C	N	T	N	N	C	T	N	C	T	C	C	C	C	C	T	N	C	N	C	T	T	N	T	T	C	T	C	C	C	C
1274	1274	M1274	SCSC-11_GI_6_1=	G/T	3	CSC-11_GI_6_1=SCAFFOLD_1954=GI_6_2=SCAFFOLD_2053=GI_6_3	1907100	+	N	T	N	G	G	G	T	N	T	G	T	N	G	N	N	T	G	N	T	G	T	T	T	T	T	G	N	T	N	T	G	G	N	G	G	T	G	T	T	T	T
1275	1275	M1275	SCSC-11_GI_6_1=	C/G	3	CSC-11_GI_6_1=SCAFFOLD_1954=GI_6_2=SCAFFOLD_2053=GI_6_3	1907114	+	N	G	N	C	C	C	G	N	G	C	G	N	C	N	N	G	C	N	G	C	G	G	G	G	G	C	N	G	N	G	C	C	N	C	C	G	C	G	G	G	G
1276	1276	M1276	SCSC-11_GI_6_1=	G/A	3	CSC-11_GI_6_1=SCAFFOLD_1954=GI_6_2=SCAFFOLD_2053=GI_6_3	1907136	+	N	A	N	G	G	G	A	N	A	G	A	N	G	N	N	A	G	N	A	G	A	A	A	A	N	G	N	A	N	A	G	G	N	G	G	A	G	A	A	A	A
1277	1277	M1277	SCSC-11_GI_6_1=	A/T	3	CSC-11_GI_6_1=SCAFFOLD_1954=GI_6_2=SCAFFOLD_2053=GI_6_3	1907142	+	N	T	N	A	A	A	T	N	T	A	T	N	A	N	N	T	A	N	T	A	T	T	T	T	N	A	N	T	N	T	A	A	N	A	A	T	A	T	T	T	T
1278	1278	M1278	SCSC-11_GI_6_1=	G/T	3	CSC-11_GI_6_1=SCAFFOLD_1954=GI_6_2=SCAFFOLD_2053=GI_6_3	1908210	+	N	T	N	G	G	G	T	N	T	G	T	N	G	N	N	T	G	N	T	G	T	T	T	T	N	G	N	T	N	T	G	G	N	G	G	T	G	T	T	T	T
1279	1279	M1279	SCSC-11_GI_6_1=	G/A	3	CSC-11_GI_6_1=SCAFFOLD_1954=GI_6_2=SCAFFOLD_2053=GI_6_3	1908260	+	N	A	N	G	G	G	A	N	A	G	A	N	G	N	N	A	G	N	A	G	A	A	A	A	N	G	N	A	N	A	G	G	N	G	G	A	G	A	A	A	A
1280	1280	M1280	SCSC-11_GI_6_1=	G/A	3	CSC-11_GI_6_1=SCAFFOLD_1954=GI_6_2=SCAFFOLD_2053=GI_6_3	1908300	+	N	A	N	G	G	G	A	N	A	G	A	N	G	N	N	A	G	N	A	G	A	A	A	A	A	G	N	A	N	A	G	G	N	G	G	A	G	A	A	A	A
1281	1281	M1281	SCSC-11_GI_6_1=	T/G	3	CSC-11_GI_6_1=SCAFFOLD_1954=GI_6_2=SCAFFOLD_2053=GI_6_3	1908308	+	N	G	N	T	T	T	G	N	G	T	G	N	T	N	N	G	T	N	G	T	G	G	G	G	G	T	N	G	N	G	T	T	N	T	T	G	T	G	G	G	G
1282	1282	M1282	SCSC-11_GI_6_1=	T/A	3	CSC-11_GI_6_1=SCAFFOLD_1954=GI_6_2=SCAFFOLD_2053=GI_6_3	1908339	+	N	A	N	T	T	T	A	N	A	T	A	N	T	N	N	A	T	N	A	T	A	A	A	A	A	T	N	A	N	A	T	T	N	T	T	A	T	A	A	A	A
1283	1283	M1283	SCSC-11_GI_6_1=	A/G	3	CSC-11_GI_6_1=SCAFFOLD_1954=GI_6_2=SCAFFOLD_2053=GI_6_3	1908871	+	N	G	N	A	A	A	G	N	G	A	G	N	A	N	N	G	A	N	G	A	G	G	G	G	N	A	N	G	N	G	A	A	N	A	A	G	A	G	G	G	G
1286	1286	M1286	SCSC-11_GI_6_1=	T/G	3	CSC-11_GI_6_1=SCAFFOLD_1954=GI_6_2=SCAFFOLD_2053=GI_6_3	1952497	+	N	G	N	T	T	T	G	N	G	T	G	N	T	N	N	G	T	N	G	T	G	G	G	G	G	T	N	G	N	G	T	T	N	T	T	G	T	G	G	G	G
1287	1287	M1287	SCSC-11_GI_6_1=	C/T	3	CSC-11_GI_6_1=SCAFFOLD_1954=GI_6_2=SCAFFOLD_2053=GI_6_3	1967935	+	N	T	N	C	C	C	T	N	T	C	T	N	C	N	N	T	C	N	T	C	T	T	T	T	T	C	N	T	N	T	C	C	N	C	C	T	C	T	T	T	T
1288	1288	M1288	SCSC-11_GI_6_1=	T/A	3	CSC-11_GI_6_1=SCAFFOLD_1954=GI_6_2=SCAFFOLD_2053=GI_6_3	2039076	+	N	A	N	T	T	A	A	N	A	T	A	N	A	N	N	A	T	N	A	T	A	A	A	A	A	T	N	A	N	A	T	T	N	T	T	A	T	A	A	A	A
1289	1289	M1289	SCSC-11_GI_6_1=	A/C	3	CSC-11_GI_6_1=SCAFFOLD_1954=GI_6_2=SCAFFOLD_2053=GI_6_3	2044339	+	N	C	A	A	A	C	C	N	C	A	C	N	C	N	N	C	A	N	C	A	C	C	C	C	C	A	N	C	N	C	A	A	N	A	A	C	A	C	C	C	C
1290	1290	M1290	SCSC-11_GI_6_1=	G/A	3	CSC-11_GI_6_1=SCAFFOLD_1954=GI_6_2=SCAFFOLD_2053=GI_6_3	2080153	+	G	A	N	G	G	A	A	N	A	G	A	N	A	N	N	A	G	N	A	G	A	A	A	A	N	G	N	A	N	A	G	G	N	G	G	A	G	A	A	A	A
1291	1291	M1291	SCSC-11_GI_6_1=	A/T	3	CSC-11_GI_6_1=SCAFFOLD_1954=GI_6_2=SCAFFOLD_2053=GI_6_3	2080161	+	A	T	N	A	A	T	T	N	T	A	T	N	T	N	N	T	A	N	T	A	T	T	T	T	N	A	N	T	N	T	A	A	N	A	A	T	A	T	T	T	T
1292	1292	M1292	SCSC-11_GI_6_1=	T/C	3	CSC-11_GI_6_1=SCAFFOLD_1954=GI_6_2=SCAFFOLD_2053=GI_6_3	2080171	+	T	C	N	T	T	C	C	N	C	T	C	N	C	N	N	C	T	N	C	T	C	C	C	C	N	T	N	C	N	C	T	T	N	T	T	C	T	C	C	C	C
1293	1293	M1293	SCSC-11_GI_6_1=	T/C	3	CSC-11_GI_6_1=SCAFFOLD_1954=GI_6_2=SCAFFOLD_2053=GI_6_3	2080174	+	T	C	N	T	T	C	C	N	C	T	C	N	C	N	N	C	T	N	C	T	C	C	C	C	N	T	N	C	N	C	T	T	N	T	T	C	T	C	C	C	C
1294	1294	M1294	SCSC-11_GI_6_1=	A/G	3	CSC-11_GI_6_1=SCAFFOLD_1954=GI_6_2=SCAFFOLD_2053=GI_6_3	2080291	+	N	G	N	A	A	G	G	N	G	A	G	N	G	A	N	G	A	N	G	A	G	G	G	G	N	A	N	G	N	G	A	A	N	A	A	G	A	G	G	G	G
1295	1295	M1295	SCSC-11_GI_6_1=	A/C	3	CSC-11_GI_6_1=SCAFFOLD_1954=GI_6_2=SCAFFOLD_2053=GI_6_3	2080293	+	N	C	N	A	A	C	C	N	C	A	C	N	C	A	N	C	A	N	C	A	C	C	C	C	N	A	N	C	N	C	A	A	N	A	A	C	A	C	C	C	C
1296	1296	M1296	SCSC-11_GI_6_1=	T/C	3	CSC-11_GI_6_1=SCAFFOLD_1954=GI_6_2=SCAFFOLD_2053=GI_6_3	2148098	+	N	C	N	T	T	C	C	N	C	T	C	N	C	N	N	C	T	N	C	T	C	C	C	C	C	T	N	C	N	C	T	T	N	T	T	C	T	C	C	C	C
1300	1300	M1300	SCSC-11_GI_6_1=	C/T	3	CSC-11_GI_6_1=SCAFFOLD_1954=GI_6_2=SCAFFOLD_2053=GI_6_3	2192337	+	N	T	N	C	C	T	T	N	T	C	T	N	T	N	N	T	C	N	T	C	T	T	T	T	T	C	N	T	N	T	C	C	N	C	C	T	C	T	T	T	T
1301	1301	M1301	SCSC-11_GI_6_1=	T/G	3	CSC-11_GI_6_1=SCAFFOLD_1954=GI_6_2=SCAFFOLD_2053=GI_6_3	2193250	+	G	G	N	T	T	G	G	N	G	T	G	N	G	N	N	G	T	N	G	T	G	G	G	G	N	T	N	G	N	G	T	T	N	T	T	G	T	G	G	G	G
1302	1302	M1302	SCSC-11_GI_6_1=	C/T	3	CSC-11_GI_6_1=SCAFFOLD_1954=GI_6_2=SCAFFOLD_2053=GI_6_3	2211427	+	N	T	C	C	C	T	T	N	T	C	T	N	T	N	N	T	C	N	T	C	T	T	T	T	T	C	N	T	N	T	C	C	N	C	C	T	C	T	T	T	T
1303	1303	M1303	SCSC-11_GI_6_1=	C/T	3	CSC-11_GI_6_1=SCAFFOLD_1954=GI_6_2=SCAFFOLD_2053=GI_6_3	2245543	+	T	T	N	C	C	T	T	N	T	C	T	N	T	N	N	T	C	N	T	C	T	T	T	T	T	C	N	T	N	T	C	C	N	C	C	T	C	T	T	T	T
1304	1304	M1304	SCSC-11_GI_6_1=	C/T	3	CSC-11_GI_6_1=SCAFFOLD_1954=GI_6_2=SCAFFOLD_2053=GI_6_3	2461667	+	N	T	N	C	C	N	T	N	T	C	T	N	T	N	N	T	C	N	T	C	T	T	C	T	T	C	N	T	N	C	C	C	N	C	C	T	C	T	T	T	T
1305	1305	M1305	SCSC-11_GI_6_1=	C/T	3	CSC-11_GI_6_1=SCAFFOLD_1954=GI_6_2=SCAFFOLD_2053=GI_6_3	2494650	+	N	T	N	C	C	T	T	N	T	C	T	N	T	N	N	T	C	N	T	C	T	T	C	T	N	C	N	T	N	C	C	C	N	C	C	T	C	T	T	T	T
1309	1309	M1309	SCSC-11_GI_6_1=	A/T	3	CSC-11_GI_6_1=SCAFFOLD_1954=GI_6_2=SCAFFOLD_2053=GI_6_3	2563890	+	N	T	N	A	A	T	T	N	T	A	T	N	T	N	N	T	N	N	T	A	T	T	W	T	N	A	N	T	N	A	A	A	N	A	A	T	A	T	T	T	T
1318	1318	M1318	SCSC-11_GI_6_1=	C/T	3	CSC-11_GI_6_1=SCAFFOLD_1954=GI_6_2=SCAFFOLD_2053=GI_6_3	2591244	+	N	T	N	C	C	T	T	N	T	C	T	N	T	N	N	T	C	N	T	C	T	T	T	T	N	C	N	T	N	C	C	C	N	C	C	T	C	T	T	T	T
1319	1319	M1319	SCSC-11_GI_6_1=	T/A	3	CSC-11_GI_6_1=SCAFFOLD_1954=GI_6_2=SCAFFOLD_2053=GI_6_3	2637369	+	N	A	N	T	T	A	A	N	A	T	A	N	A	N	N	A	T	N	A	T	A	A	W	A	N	T	N	A	N	T	T	T	N	T	T	A	T	A	A	A	A
1320	1320	M1320	SCSC-11_GI_6_1=	G/A	3	CSC-11_GI_6_1=SCAFFOLD_1954=GI_6_2=SCAFFOLD_2053=GI_6_3	2637372	+	N	A	N	G	G	A	A	N	A	G	A	N	A	N	N	A	G	N	A	G	A	A	R	A	N	G	N	A	N	G	G	G	N	G	G	A	G	A	A	A	A
1321	1321	M1321	SCSC-11_GI_6_1=	G/C	3	CSC-11_GI_6_1=SCAFFOLD_1954=GI_6_2=SCAFFOLD_2053=GI_6_3	2752320	+	N	C	N	G	G	C	C	N	C	G	C	N	C	N	N	C	G	N	C	G	C	C	C	C	N	G	N	C	N	G	G	G	N	G	G	C	G	C	C	C	C
1322	1322	M1322	SCSC-11_GI_6_1=	A/G	3	CSC-11_GI_6_1=SCAFFOLD_1954=GI_6_2=SCAFFOLD_2053=GI_6_3	2752414	+	N	G	N	A	A	G	G	N	G	A	G	N	G	N	N	G	A	N	G	A	G	G	G	G	G	A	N	G	N	A	A	A	N	A	A	G	A	G	G	G	G
1323	1323	M1323	SCSC-11_GI_6_1=	C/T	3	CSC-11_GI_6_1=SCAFFOLD_1954=GI_6_2=SCAFFOLD_2053=GI_6_3	2752685	+	N	T	N	C	C	T	T	N	T	C	T	N	T	N	N	T	C	N	T	C	T	T	T	T	T	C	N	T	N	C	C	C	N	C	C	T	C	T	T	T	T
1324	1324	M1324	SCSC-11_GI_6_1=	C/T	3	CSC-11_GI_6_1=SCAFFOLD_1954=GI_6_2=SCAFFOLD_2053=GI_6_3	2776288	+	N	T	N	C	C	T	T	N	T	C	T	N	T	N	N	T	C	N	T	C	T	T	T	T	T	C	N	T	N	T	C	C	N	C	C	T	C	T	T	T	T
1325	1325	M1325	SCSC-11_GI_6_1=	A/G	3	CSC-11_GI_6_1=SCAFFOLD_1954=GI_6_2=SCAFFOLD_2053=GI_6_3	2787470	+	N	G	N	A	A	G	G	N	G	A	G	G	G	N	N	G	A	N	G	A	G	G	G	G	N	A	N	G	N	G	A	A	N	A	A	G	A	G	G	G	G
1326	1326	M1326	SCSC-11_GI_6_1=	T/A	3	CSC-11_GI_6_1=SCAFFOLD_1954=GI_6_2=SCAFFOLD_2053=GI_6_3	2806753	+	N	A	N	T	T	A	A	N	A	T	A	N	A	N	N	A	T	N	A	T	A	A	A	A	T	T	N	W	N	A	T	T	N	T	T	A	T	A	A	A	A
1327	1327	M1327	SCSC-11_GI_6_1=	G/C	3	CSC-11_GI_6_1=SCAFFOLD_1954=GI_6_2=SCAFFOLD_2053=GI_6_3	2806754	+	N	C	N	G	G	C	C	N	C	G	C	N	C	N	N	C	G	N	C	G	C	C	C	C	G	G	N	S	N	C	G	G	N	G	G	C	G	C	C	C	C
1330	1330	M1330	SCSC-11_GI_6_1=	G/C	3	CSC-11_GI_6_1=SCAFFOLD_1954=GI_6_2=SCAFFOLD_2053=GI_6_3	2806773	+	N	C	N	G	G	C	C	N	C	G	C	N	C	N	N	C	G	N	C	G	C	C	C	C	G	G	N	C	N	C	G	G	N	G	G	C	G	C	C	C	C
1331	1331	M1331	SCSC-11_GI_6_1=	T/A	3	CSC-11_GI_6_1=SCAFFOLD_1954=GI_6_2=SCAFFOLD_2053=GI_6_3	2806974	+	N	A	N	T	T	A	A	N	A	T	A	N	A	N	N	A	T	N	A	T	A	A	A	A	N	T	N	A	N	A	T	T	N	T	T	A	T	A	A	A	A
1332	1332	M1332	SCSC-11_GI_6_1=	C/T	3	CSC-11_GI_6_1=SCAFFOLD_1954=GI_6_2=SCAFFOLD_2053=GI_6_3	2806978	+	N	T	N	C	C	T	T	N	T	C	T	N	T	N	N	T	C	N	T	C	T	T	T	T	N	C	N	T	N	T	C	C	N	C	C	T	C	T	T	T	T
1333	1333	M1333	SCSC-11_GI_6_1=	A/C	3	CSC-11_GI_6_1=SCAFFOLD_1954=GI_6_2=SCAFFOLD_2053=GI_6_3	2844995	+	N	C	C	A	A	C	C	N	C	A	A	N	C	N	N	C	A	N	C	A	C	C	C	C	A	A	N	C	N	C	A	A	N	A	A	C	A	C	C	C	C
1334	1334	M1334	SCSC-11_GI_6_1=	A/G	3	CSC-11_GI_6_1=SCAFFOLD_1954=GI_6_2=SCAFFOLD_2053=GI_6_3	2845012	+	N	G	G	A	A	G	G	N	G	A	A	N	G	N	N	G	A	N	G	A	G	G	G	G	A	A	N	G	N	G	A	A	N	A	A	G	A	G	G	G	G
1335	1335	M1335	SCSC-11_GI_6_1=	A/T	3	CSC-11_GI_6_1=SCAFFOLD_1954=GI_6_2=SCAFFOLD_2053=GI_6_3	2845013	+	N	T	T	A	A	T	T	N	T	A	A	N	T	N	N	T	A	N	T	A	T	T	T	T	A	A	N	T	N	T	A	A	N	A	A	T	A	T	T	T	T
1336	1336	M1336	SCSC-11_GI_6_1=	C/A	3	CSC-11_GI_6_1=SCAFFOLD_1954=GI_6_2=SCAFFOLD_2053=GI_6_3	2845032	+	N	A	A	C	C	A	A	N	A	C	C	N	A	N	N	A	C	N	A	C	A	A	A	A	C	C	N	A	N	A	C	C	N	C	C	A	C	A	A	A	A
1337	1337	M1337	SCSC-11_GI_6_1=	C/T	3	CSC-11_GI_6_1=SCAFFOLD_1954=GI_6_2=SCAFFOLD_2053=GI_6_3	2902418	+	N	T	N	C	C	T	T	N	T	C	C	N	T	N	N	T	C	N	T	C	T	T	T	T	N	C	N	T	N	C	C	C	N	C	C	T	C	T	T	T	T
1338	1338	M1338	SCSC-11_GI_6_1=	A/G	3	CSC-11_GI_6_1=SCAFFOLD_1954=GI_6_2=SCAFFOLD_2053=GI_6_3	2925175	+	G	G	N	A	A	G	G	N	G	A	A	N	G	N	N	G	A	N	G	A	G	G	G	G	A	A	N	G	N	A	A	A	N	A	A	G	A	G	G	G	G
1339	1339	M1339	SCSC-11_GI_6_1=	G/T	3	CSC-11_GI_6_1=SCAFFOLD_1954=GI_6_2=SCAFFOLD_2053=GI_6_3	2930851	+	N	T	N	G	G	T	T	N	T	G	G	N	T	N	N	T	G	N	T	G	T	T	T	T	N	G	N	T	N	G	G	G	N	G	G	T	G	T	T	T	T
1340	1340	M1340	SCSC-11_GI_6_1=	C/A	3	CSC-11_GI_6_1=SCAFFOLD_1954=GI_6_2=SCAFFOLD_2053=GI_6_3	2930951	+	N	A	N	C	C	A	A	N	A	C	C	N	A	N	N	A	C	N	A	C	A	A	A	A	N	C	N	A	N	C	C	C	N	C	C	A	C	A	A	A	A
1349	1349	M1349	SCSC-11_GI_6_1=	G/A	3	CSC-11_GI_6_1=SCAFFOLD_1954=GI_6_2=SCAFFOLD_2053=GI_6_3	3174178	+	N	A	A	G	G	A	A	N	A	G	G	N	A	N	N	A	G	N	A	G	A	A	A	A	G	G	N	A	N	A	G	G	N	G	G	A	G	A	A	A	A
1350	1350	M1350	SCSC-11_GI_6_1=	C/T	3	CSC-11_GI_6_1=SCAFFOLD_1954=GI_6_2=SCAFFOLD_2053=GI_6_3	3174575	+	N	T	N	C	C	T	T	N	T	C	C	N	T	N	N	T	C	N	T	C	T	T	T	T	C	C	N	T	N	T	C	C	N	C	C	T	C	T	T	T	T
1351	1351	M1351	SCSC-11_GI_6_1=	T/C	3	CSC-11_GI_6_1=SCAFFOLD_1954=GI_6_2=SCAFFOLD_2053=GI_6_3	3174576	+	N	C	N	T	T	C	C	N	C	T	T	N	C	N	N	C	T	N	C	T	C	C	C	C	T	T	N	C	N	C	T	T	N	T	T	C	T	C	C	C	C
1352	1352	M1352	SCSC-11_GI_6_1=	G/A	3	CSC-11_GI_6_1=SCAFFOLD_1954=GI_6_2=SCAFFOLD_2053=GI_6_3	3174577	+	N	A	N	G	G	A	A	N	A	G	G	N	A	N	N	A	G	N	A	G	A	A	A	A	G	G	N	A	N	A	G	G	N	G	G	A	G	A	A	A	A
1353	1353	M1353	SCSC-11_GI_6_1=	C/T	3	CSC-11_GI_6_1=SCAFFOLD_1954=GI_6_2=SCAFFOLD_2053=GI_6_3	3174587	+	N	T	N	C	C	T	T	N	T	C	C	N	T	N	N	T	C	N	T	C	T	T	T	T	C	C	N	T	N	T	C	C	N	C	C	T	C	T	T	T	T
1354	1354	M1354	SCSC-11_GI_6_1=	T/A	3	CSC-11_GI_6_1=SCAFFOLD_1954=GI_6_2=SCAFFOLD_2053=GI_6_3	3175183	+	N	A	N	T	T	A	A	N	A	T	T	N	A	N	N	A	T	N	A	T	A	A	A	A	N	T	N	A	N	A	T	T	N	T	T	A	T	A	A	A	A
1355	1355	M1355	SCSC-11_GI_6_1=	C/G	3	CSC-11_GI_6_1=SCAFFOLD_1954=GI_6_2=SCAFFOLD_2053=GI_6_3	3175220	+	N	G	N	C	C	G	G	N	G	C	C	N	G	N	N	G	C	N	G	C	G	G	G	G	N	C	N	G	N	G	C	C	N	C	C	G	C	G	G	G	G
1356	1356	M1356	SCSC-11_GI_6_1=	A/G	3	CSC-11_GI_6_1=SCAFFOLD_1954=GI_6_2=SCAFFOLD_2053=GI_6_3	3175244	+	N	G	N	A	A	G	G	N	G	A	A	N	G	N	N	G	A	N	G	A	G	G	G	G	N	A	N	G	N	G	A	A	N	A	A	G	A	G	G	G	G
1357	1357	M1357	SCSC-11_GI_6_1=	A/C	3	CSC-11_GI_6_1=SCAFFOLD_1954=GI_6_2=SCAFFOLD_2053=GI_6_3	3175269	+	N	C	N	A	A	C	C	N	C	A	A	N	C	N	N	C	A	N	C	A	C	C	C	C	N	A	N	C	N	C	A	A	N	A	A	C	A	C	C	C	C
1358	1358	M1358	SCSC-11_GI_6_1=	C/A	3	CSC-11_GI_6_1=SCAFFOLD_1954=GI_6_2=SCAFFOLD_2053=GI_6_3	3175270	+	N	A	N	C	C	A	A	N	A	C	C	N	A	N	N	A	C	N	A	C	A	A	A	A	N	C	N	A	N	A	C	C	N	C	C	A	C	A	A	A	A
1359	1359	M1359	SCSC-11_GI_6_1=	C/T	3	CSC-11_GI_6_1=SCAFFOLD_1954=GI_6_2=SCAFFOLD_2053=GI_6_3	3321820	+	N	T	N	C	C	T	C	N	T	C	C	N	T	N	N	T	C	N	T	C	T	T	T	T	C	C	N	T	N	T	C	C	N	C	C	T	C	T	T	T	T
1360	1360	M1360	SCSC-11_GI_6_1=	T/C	3	CSC-11_GI_6_1=SCAFFOLD_1954=GI_6_2=SCAFFOLD_2053=GI_6_3	3321877	+	N	C	N	T	T	C	T	N	C	N	T	N	C	N	N	C	T	N	C	T	C	C	C	C	T	T	N	C	N	C	T	T	N	T	T	C	T	C	C	C	C
1361	1361	M1361	SCSC-11_GI_6_1=	A/G	3	CSC-11_GI_6_1=SCAFFOLD_1954=GI_6_2=SCAFFOLD_2053=GI_6_3	3384791	+	N	G	N	A	A	G	A	N	G	A	A	N	G	N	N	G	A	N	G	A	G	G	G	G	A	A	N	G	N	G	A	A	N	A	A	G	A	G	G	G	G
1362	1362	M1362	SCSC-11_GI_6_1=	G/A	3	CSC-11_GI_6_1=SCAFFOLD_1954=GI_6_2=SCAFFOLD_2053=GI_6_3	3418201	+	N	A	N	G	G	A	G	N	A	N	G	N	A	N	N	A	G	N	A	G	A	A	A	A	A	G	N	A	N	A	G	G	N	G	G	A	G	A	A	A	A
1363	1363	M1363	SCSC-11_GI_6_1=	G/C	3	CSC-11_GI_6_1=SCAFFOLD_1954=GI_6_2=SCAFFOLD_2053=GI_6_3	3434901	+	N	C	N	G	G	C	G	N	C	G	G	N	C	N	N	C	G	N	C	G	C	C	C	C	N	G	N	C	N	C	G	G	N	G	G	C	G	C	C	C	C
1364	1364	M1364	SCSC-11_GI_6_1=	A/T	3	CSC-11_GI_6_1=SCAFFOLD_1954=GI_6_2=SCAFFOLD_2053=GI_6_3	3434920	+	N	T	N	A	A	T	A	N	T	A	A	N	T	N	N	T	A	N	T	A	T	T	T	T	N	A	N	T	N	T	A	A	N	A	A	T	A	T	T	T	T
1365	1365	M1365	SCSC-11_GI_6_1=	A/T	3	CSC-11_GI_6_1=SCAFFOLD_1954=GI_6_2=SCAFFOLD_2053=GI_6_3	3434943	+	N	T	N	A	A	T	A	N	T	A	A	N	T	N	N	T	A	N	T	A	T	T	T	T	N	A	N	T	N	T	A	A	N	A	A	T	A	T	T	T	T
1366	1366	M1366	SCSC-11_GI_6_1=	C/T	3	CSC-11_GI_6_1=SCAFFOLD_1954=GI_6_2=SCAFFOLD_2053=GI_6_3	3434991	+	N	T	N	C	C	T	C	N	T	C	C	N	T	N	N	T	C	N	T	C	T	T	T	T	T	C	N	T	N	T	C	C	N	C	C	T	C	T	T	T	T
1367	1367	M1367	SCSC-11_GI_6_1=	G/C	3	CSC-11_GI_6_1=SCAFFOLD_1954=GI_6_2=SCAFFOLD_2053=GI_6_3	3435003	+	N	C	N	G	G	C	G	N	C	G	G	N	C	N	N	C	G	N	C	G	C	C	C	C	C	G	N	C	N	C	G	G	N	G	G	C	G	C	C	C	C
1368	1368	M1368	SCSC-11_GI_6_1=	G/A	3	CSC-11_GI_6_1=SCAFFOLD_1954=GI_6_2=SCAFFOLD_2053=GI_6_3	3435006	+	N	A	N	G	G	A	G	N	A	G	G	N	A	N	N	A	G	N	A	G	A	A	A	A	A	G	N	A	N	A	G	G	N	G	G	A	G	A	A	A	A
1369	1369	M1369	SCSC-11_GI_6_1=	A/G	3	CSC-11_GI_6_1=SCAFFOLD_1954=GI_6_2=SCAFFOLD_2053=GI_6_3	3440256	+	N	G	N	A	A	G	A	N	G	A	A	N	G	N	N	G	A	N	G	A	G	G	G	G	G	A	N	G	N	G	A	A	N	A	A	G	A	G	G	G	G
1370	1370	M1370	SCSC-11_GI_6_1=	T/C	3	CSC-11_GI_6_1=SCAFFOLD_1954=GI_6_2=SCAFFOLD_2053=GI_6_3	3440257	+	N	C	N	T	T	C	T	N	C	T	T	N	C	N	N	C	T	N	C	T	C	C	C	C	C	T	N	C	N	C	T	T	N	T	T	C	T	C	C	C	C
1371	1371	M1371	SCSC-11_GI_6_1=	T/C	3	CSC-11_GI_6_1=SCAFFOLD_1954=GI_6_2=SCAFFOLD_2053=GI_6_3	3440266	+	N	C	N	T	T	C	T	N	C	T	T	N	C	N	N	C	T	N	C	T	C	C	C	C	C	T	N	C	N	C	T	T	N	T	T	C	T	C	C	C	C
1372	1372	M1372	SCSC-11_GI_6_1=	T/C	3	CSC-11_GI_6_1=SCAFFOLD_1954=GI_6_2=SCAFFOLD_2053=GI_6_3	3440273	+	N	C	N	T	T	C	T	N	C	T	T	N	C	N	N	C	T	N	C	T	C	C	C	C	C	T	N	C	N	C	T	T	N	T	T	C	T	C	C	C	C
1373	1373	M1373	SCSC-11_GI_6_1=	G/A	3	CSC-11_GI_6_1=SCAFFOLD_1954=GI_6_2=SCAFFOLD_2053=GI_6_3	3440695	+	N	A	N	G	G	A	G	N	A	G	G	N	A	N	N	A	G	N	A	G	A	A	A	A	N	G	N	A	N	A	G	G	N	G	G	A	G	A	A	A	A
1374	1374	M1374	SCSC-11_GI_6_1=	T/C	3	CSC-11_GI_6_1=SCAFFOLD_1954=GI_6_2=SCAFFOLD_2053=GI_6_3	3440698	+	N	C	N	T	T	C	T	N	C	T	T	N	C	N	N	C	T	N	C	T	C	C	C	C	N	T	N	C	N	C	T	T	N	T	T	C	T	C	C	C	C
1375	1375	M1375	SCSC-11_GI_6_1=	G/A	3	CSC-11_GI_6_1=SCAFFOLD_1954=GI_6_2=SCAFFOLD_2053=GI_6_3	3440731	+	N	A	N	G	G	A	G	N	A	G	G	N	A	N	N	A	G	N	A	G	A	A	A	A	N	G	N	A	N	A	G	G	N	G	G	A	G	A	A	A	A
1376	1376	M1376	SCSC-11_GI_6_1=	C/T	3	CSC-11_GI_6_1=SCAFFOLD_1954=GI_6_2=SCAFFOLD_2053=GI_6_3	3475408	+	N	T	N	C	C	T	C	N	T	C	C	N	T	N	N	T	C	N	T	C	T	T	T	T	N	C	N	T	N	T	C	C	N	C	C	T	C	T	T	T	T
1377	1377	M1377	SCSC-11_GI_6_1=	A/C	3	CSC-11_GI_6_1=SCAFFOLD_1954=GI_6_2=SCAFFOLD_2053=GI_6_3	3475416	+	N	C	N	A	A	C	A	N	C	A	A	N	C	N	N	C	A	N	C	A	C	C	C	C	N	A	N	C	N	C	A	A	N	A	A	C	A	C	C	C	C
1379	1379	M1379	SCSC-11_GI_6_1=	A/G	3	CSC-11_GI_6_1=SCAFFOLD_1954=GI_6_2=SCAFFOLD_2053=GI_6_3	3594785	+	N	G	N	A	A	G	A	N	G	A	A	N	G	N	N	G	A	N	G	A	G	G	G	G	G	A	N	G	N	G	A	A	N	A	A	G	A	G	G	G	G
1380	1380	M1380	SCSC-11_GI_6_1=	C/T	3	CSC-11_GI_6_1=SCAFFOLD_1954=GI_6_2=SCAFFOLD_2053=GI_6_3	3594788	+	N	T	N	C	C	T	C	N	T	C	C	N	T	N	N	T	C	N	T	C	T	T	T	T	T	C	N	T	N	T	C	C	N	C	C	T	C	T	T	T	T
1381	1381	M1381	SCSC-11_GI_6_1=	A/G	3	CSC-11_GI_6_1=SCAFFOLD_1954=GI_6_2=SCAFFOLD_2053=GI_6_3	3594813	+	N	G	N	A	A	G	A	N	G	A	A	N	G	N	N	G	A	N	G	A	G	G	G	G	G	A	N	G	N	G	A	A	N	A	A	G	A	G	G	G	G
1382	1382	M1382	SCSC-11_GI_6_1=	T/A	3	CSC-11_GI_6_1=SCAFFOLD_1954=GI_6_2=SCAFFOLD_2053=GI_6_3	3594883	+	N	A	N	T	T	A	T	N	A	T	T	N	A	N	N	A	N	N	A	T	A	A	A	A	N	T	N	A	N	A	T	T	N	T	T	A	T	A	A	A	A
1383	1383	M1383	SCSC-11_GI_6_1=	A/G	3	CSC-11_GI_6_1=SCAFFOLD_1954=GI_6_2=SCAFFOLD_2053=GI_6_3	3594884	+	N	G	N	A	A	G	A	N	G	A	A	N	G	N	N	G	N	N	G	A	G	G	G	G	N	A	N	G	N	G	A	A	N	A	A	G	A	G	G	G	G
1384	1384	M1384	SCSC-11_GI_6_1=	G/T	3	CSC-11_GI_6_1=SCAFFOLD_1954=GI_6_2=SCAFFOLD_2053=GI_6_3	3596029	+	N	T	N	G	G	T	G	N	T	G	G	N	T	N	N	T	G	N	T	G	T	T	T	T	T	G	N	T	N	T	G	G	N	G	G	T	G	T	T	T	T
1385	1385	M1385	SCSC-11_GI_6_1=	T/G	3	CSC-11_GI_6_1=SCAFFOLD_1954=GI_6_2=SCAFFOLD_2053=GI_6_3	3596044	+	N	G	N	T	T	G	T	N	G	T	T	N	G	N	N	G	T	N	G	T	G	G	G	G	G	T	N	G	N	G	T	T	N	T	T	G	T	G	G	G	G
1386	1386	M1386	SCSC-11_GI_6_1=	C/A	3	CSC-11_GI_6_1=SCAFFOLD_1954=GI_6_2=SCAFFOLD_2053=GI_6_3	3596047	+	N	A	N	C	C	A	C	N	A	C	C	N	A	N	N	A	C	N	A	C	A	A	A	A	A	C	N	A	N	A	C	C	N	C	C	A	C	A	A	A	A
1387	1387	M1387	SCSC-11_GI_6_1=	G/T	3	CSC-11_GI_6_1=SCAFFOLD_1954=GI_6_2=SCAFFOLD_2053=GI_6_3	3596052	+	N	T	N	G	G	T	G	N	T	G	G	N	T	N	N	T	G	N	T	G	T	T	T	T	T	G	N	T	N	T	G	G	N	G	G	T	G	T	T	T	T
1414	1414	M1414	SCSC-11_GI_6_1=	A/C	3	CSC-11_GI_6_1=SCAFFOLD_1954=GI_6_2=SCAFFOLD_2053=GI_6_3	3849750	+	N	C	N	A	A	C	A	N	C	A	A	N	C	N	N	C	A	N	C	A	C	A	C	C	N	A	N	C	N	C	A	A	N	A	A	C	A	C	C	C	C
1415	1415	M1415	SCSC-11_GI_6_1=	C/G	3	CSC-11_GI_6_1=SCAFFOLD_1954=GI_6_2=SCAFFOLD_2053=GI_6_3	3849789	+	N	G	N	C	C	G	C	N	G	C	C	N	G	N	N	G	C	N	G	C	G	C	G	G	G	C	N	G	N	G	C	C	N	C	C	G	C	G	G	G	G
1417	1417	M1417	SCSC-11_GI_6_1=	C/T	3	CSC-11_GI_6_1=SCAFFOLD_1954=GI_6_2=SCAFFOLD_2053=GI_6_3	3891111	+	N	T	N	C	C	T	C	N	T	C	C	N	T	N	N	T	C	N	T	C	T	C	T	T	T	C	N	T	N	T	C	C	N	C	C	T	C	T	T	T	T
1418	1418	M1418	SCSC-11_GI_6_1=	T/A	3	CSC-11_GI_6_1=SCAFFOLD_1954=GI_6_2=SCAFFOLD_2053=GI_6_3	3891120	+	N	A	N	T	T	A	T	N	A	T	T	N	A	N	N	A	T	N	A	T	A	T	A	A	A	T	N	A	N	A	T	T	N	T	T	A	T	A	A	A	A
1419	1419	M1419	SCSC-11_GI_6_1=	G/T	3	CSC-11_GI_6_1=SCAFFOLD_1954=GI_6_2=SCAFFOLD_2053=GI_6_3	3891141	+	N	T	N	G	G	T	G	N	T	G	G	N	T	N	N	T	G	N	T	G	T	G	T	T	T	G	N	T	N	T	G	G	N	G	G	T	G	T	T	T	T
1420	1420	M1420	SCSC-11_GI_6_1=	T/C	3	CSC-11_GI_6_1=SCAFFOLD_1954=GI_6_2=SCAFFOLD_2053=GI_6_3	3894760	+	N	C	N	T	T	C	T	N	C	T	T	N	C	N	N	C	T	N	C	T	C	T	C	C	C	T	N	C	N	C	T	T	N	T	T	C	T	C	C	C	C
1421	1421	M1421	SCSC-11_GI_6_1=	T/C	3	CSC-11_GI_6_1=SCAFFOLD_1954=GI_6_2=SCAFFOLD_2053=GI_6_3	3894798	+	N	C	N	T	T	C	T	N	C	T	T	N	C	N	N	C	T	N	C	T	C	T	C	C	N	T	N	C	N	C	T	T	N	T	T	C	T	C	C	C	C
1422	1422	M1422	SCSC-11_GI_6_1=	A/G	3	CSC-11_GI_6_1=SCAFFOLD_1954=GI_6_2=SCAFFOLD_2053=GI_6_3	3896172	+	N	G	N	A	A	G	A	N	G	A	A	N	G	N	N	G	A	N	G	A	G	A	G	G	G	A	N	G	N	G	A	A	N	A	A	G	A	G	G	G	G
1423	1423	M1423	SCSC-11_GI_6_1=	T/G	3	CSC-11_GI_6_1=SCAFFOLD_1954=GI_6_2=SCAFFOLD_2053=GI_6_3	3896186	+	N	G	N	T	T	G	T	N	G	T	T	N	G	N	N	G	T	N	G	T	G	T	G	G	G	T	N	G	N	G	T	T	N	T	T	G	T	G	G	G	G
1424	1424	M1424	SCSC-11_GI_6_1=	T/C	3	CSC-11_GI_6_1=SCAFFOLD_1954=GI_6_2=SCAFFOLD_2053=GI_6_3	3897873	+	N	C	C	T	T	C	T	N	C	T	T	N	C	N	N	C	T	N	C	T	C	T	C	C	N	T	N	C	N	C	T	T	N	T	T	C	T	C	C	C	C
1427	1427	M1427	SCSC-11_GI_6_1=	G/C	3	CSC-11_GI_6_1=SCAFFOLD_1954=GI_6_2=SCAFFOLD_2053=GI_6_3	3955122	+	N	C	N	G	G	C	G	N	C	G	G	N	C	N	N	C	G	N	C	G	C	G	C	C	N	G	N	C	N	C	G	G	N	G	G	C	G	C	C	C	C
1431	1431	M1431	SCSC-11_GI_6_1=	C/T	3	CSC-11_GI_6_1=SCAFFOLD_1954=GI_6_2=SCAFFOLD_2053=GI_6_3	4037952	+	N	T	N	C	C	T	C	N	T	C	C	N	T	C	N	T	C	N	T	C	T	C	T	T	T	C	N	T	N	T	C	C	N	C	C	T	C	T	T	T	T
1432	1432	M1432	SCSC-11_GI_6_1=	A/C	3	CSC-11_GI_6_1=SCAFFOLD_1954=GI_6_2=SCAFFOLD_2053=GI_6_3	4037970	+	N	C	N	A	A	C	A	N	C	A	A	N	C	A	N	C	A	N	C	A	C	A	C	C	C	A	N	C	N	C	A	A	N	A	A	C	A	C	C	C	C
1468	1468	M1468	SCSC-11_GI_6_1=	A/T	3	CSC-11_GI_6_1=SCAFFOLD_1954=GI_6_2=SCAFFOLD_2053=GI_6_3	4119554	+	N	T	N	A	A	T	A	N	T	A	A	N	T	N	N	T	A	N	T	A	T	A	T	T	N	A	N	T	N	T	A	A	N	A	A	T	A	T	T	T	T
1469	1469	M1469	SCSC-11_GI_6_1=	G/A	3	CSC-11_GI_6_1=SCAFFOLD_1954=GI_6_2=SCAFFOLD_2053=GI_6_3	4119572	+	N	A	N	G	G	A	G	N	A	G	G	N	A	N	N	A	G	N	A	G	A	G	A	A	N	G	N	A	N	A	G	G	N	G	G	A	G	A	A	A	A
1470	1470	M1470	SCSC-11_GI_6_1=	T/C	3	CSC-11_GI_6_1=SCAFFOLD_1954=GI_6_2=SCAFFOLD_2053=GI_6_3	4119581	+	N	C	N	T	T	C	T	N	C	T	T	N	C	N	N	C	T	N	C	T	C	T	C	C	N	T	N	C	N	C	T	T	N	T	T	C	T	C	C	C	C
1474	1474	M1474	SCSC-11_GI_6_1=	T/C	3	CSC-11_GI_6_1=SCAFFOLD_1954=GI_6_2=SCAFFOLD_2053=GI_6_3	4224932	+	N	C	N	T	T	C	T	N	C	T	T	N	C	N	N	C	T	N	C	T	C	T	C	C	C	T	N	C	N	C	T	T	N	T	T	C	T	C	C	C	C
1477	1477	M1477	SCSC-11_GI_6_1=	T/G	3	CSC-11_GI_6_1=SCAFFOLD_1954=GI_6_2=SCAFFOLD_2053=GI_6_3	4261013	+	N	G	N	T	T	G	T	N	G	T	T	N	G	N	N	G	T	N	G	T	G	T	G	G	N	T	N	G	N	G	T	T	N	T	T	G	T	G	G	G	G
1550	1550	M1550	SCSC-11_GI_6_1=	A/G	3	CSC-11_GI_6_1=SCAFFOLD_1954=GI_6_2=SCAFFOLD_2053=GI_6_3	4337677	+	N	G	N	A	A	G	A	N	G	A	A	N	G	A	N	G	A	N	G	A	G	A	G	G	N	A	N	G	N	G	R	A	N	A	A	G	A	G	G	G	G
1632	1632	M1632	SCSC-11_GI_6_1=	T/C	3	CSC-11_GI_6_1=SCAFFOLD_1954=GI_6_2=SCAFFOLD_2053=GI_6_3	4552002	+	N	C	N	T	T	C	T	N	C	T	T	N	C	N	N	C	T	N	C	T	C	T	C	C	N	T	N	C	N	C	T	T	N	T	T	C	T	C	C	C	C
1633	1633	M1633	SCSC-11_GI_6_1=	G/A	3	CSC-11_GI_6_1=SCAFFOLD_1954=GI_6_2=SCAFFOLD_2053=GI_6_3	4557623	+	N	A	N	G	G	A	G	N	A	G	G	N	A	N	N	A	G	N	A	G	A	G	A	A	N	G	N	A	N	A	G	G	N	G	G	A	G	A	A	A	A
1682	1682	M1682	SCSC-11_GI_6_1=	A/G	3	CSC-11_GI_6_1=SCAFFOLD_1954=GI_6_2=SCAFFOLD_2053=GI_6_3	4651772	+	N	G	N	A	A	G	A	N	G	A	A	N	G	N	N	G	A	N	G	A	G	A	G	G	G	A	N	G	N	G	A	A	N	A	A	G	A	G	G	G	G
1683	1683	M1683	SCSC-11_GI_6_1=	T/G	3	CSC-11_GI_6_1=SCAFFOLD_1954=GI_6_2=SCAFFOLD_2053=GI_6_3	4669480	+	G	G	N	T	T	G	T	N	G	T	T	N	G	N	N	G	T	N	G	T	G	T	G	G	G	T	N	G	N	G	T	T	N	T	T	G	T	G	G	G	G
1684	1684	M1684	SCSC-11_GI_6_1=	C/T	3	CSC-11_GI_6_1=SCAFFOLD_1954=GI_6_2=SCAFFOLD_2053=GI_6_3	4736024	+	N	T	N	C	C	T	C	N	T	C	C	N	T	N	N	T	C	N	T	C	T	C	T	T	T	C	N	T	N	T	C	C	N	C	C	T	C	T	T	T	T
1709	1709	M1709	SCSC-11_GI_6_1=	T/C	3	CSC-11_GI_6_1=SCAFFOLD_1954=GI_6_2=SCAFFOLD_2053=GI_6_3	4939357	+	C	C	N	T	T	C	T	N	C	T	T	N	C	N	N	C	T	N	C	T	C	T	C	C	C	T	N	C	N	C	T	T	N	T	T	C	T	C	Y	C	C
1710	1710	M1710	SCSC-11_GI_6_1=	A/G	3	CSC-11_GI_6_1=SCAFFOLD_1954=GI_6_2=SCAFFOLD_2053=GI_6_3	4939400	+	G	G	N	A	A	G	A	N	G	A	A	N	G	N	N	G	A	N	G	A	G	A	G	G	G	A	N	G	N	G	A	A	N	A	A	G	A	G	R	G	G
1718	1718	M1718	SCSC-11_GI_6_1=	G/A	3	CSC-11_GI_6_1=SCAFFOLD_1954=GI_6_2=SCAFFOLD_2053=GI_6_3	4972831	+	N	A	N	G	G	A	G	N	A	G	G	N	A	N	N	A	G	N	A	G	A	G	A	A	A	G	N	A	N	A	G	G	N	G	G	A	G	A	G	A	A
1719	1719	M1719	SCSC-11_GI_6_1=	T/A	3	CSC-11_GI_6_1=SCAFFOLD_1954=GI_6_2=SCAFFOLD_2053=GI_6_3	5106273	+	N	A	N	T	T	A	T	N	A	T	T	N	A	N	N	A	T	N	A	T	A	T	A	A	A	T	N	A	N	A	T	T	N	T	T	A	T	A	A	A	A
1720	1720	M1720	SCSC-11_GI_6_1=	C/T	3	CSC-11_GI_6_1=SCAFFOLD_1954=GI_6_2=SCAFFOLD_2053=GI_6_3	5121598	+	N	T	N	C	C	T	C	N	T	C	C	N	T	N	N	T	C	N	T	C	T	C	T	T	T	C	N	T	N	T	C	C	N	C	C	T	C	T	T	T	T
1721	1721	M1721	SCSC-11_GI_6_1=	A/C	3	CSC-11_GI_6_1=SCAFFOLD_1954=GI_6_2=SCAFFOLD_2053=GI_6_3	5161259	+	N	C	N	A	A	C	A	N	C	A	A	N	C	N	N	C	A	N	C	A	C	A	C	C	C	A	N	C	N	C	A	A	N	A	A	C	A	C	C	C	C
1722	1722	M1722	SCSC-11_GI_6_1=	C/T	3	CSC-11_GI_6_1=SCAFFOLD_1954=GI_6_2=SCAFFOLD_2053=GI_6_3	5161277	+	N	T	N	C	C	T	C	N	T	C	C	N	T	N	N	T	C	N	T	C	T	C	T	T	N	C	N	T	N	T	C	C	N	C	C	T	C	T	T	T	T
1723	1723	M1723	SCSC-11_GI_6_1=	T/C	3	CSC-11_GI_6_1=SCAFFOLD_1954=GI_6_2=SCAFFOLD_2053=GI_6_3	5162168	+	N	C	C	T	T	C	T	N	C	T	T	N	C	N	N	C	T	N	C	T	C	T	C	C	N	T	N	C	N	C	T	T	N	T	T	C	T	C	C	C	C
1724	1724	M1724	SCSC-11_GI_6_1=	C/T	3	CSC-11_GI_6_1=SCAFFOLD_1954=GI_6_2=SCAFFOLD_2053=GI_6_3	5163374	+	N	T	N	C	C	T	C	N	T	C	C	N	T	N	N	T	C	N	T	C	T	C	T	T	T	C	N	T	N	T	C	C	N	C	C	T	C	T	T	T	T
1726	1726	M1726	SCSC-11_GI_6_1=	T/C	3	CSC-11_GI_6_1=SCAFFOLD_1954=GI_6_2=SCAFFOLD_2053=GI_6_3	5482857	+	N	C	N	T	T	C	T	N	C	T	T	N	C	N	N	C	T	N	C	T	C	T	C	C	C	T	N	C	N	C	T	T	N	T	T	C	T	C	Y	C	T
1727	1727	M1727	SCSC-11_GI_6_1=	C/T	3	CSC-11_GI_6_1=SCAFFOLD_1954=GI_6_2=SCAFFOLD_2053=GI_6_3	5585060	+	N	T	T	C	C	T	C	N	T	C	C	N	T	N	N	T	C	N	T	C	T	C	T	T	T	C	N	T	N	T	C	C	N	C	C	T	C	T	Y	T	C
1728	1728	M1728	SCSC-11_GI_6_1=	G/A	3	CSC-11_GI_6_1=SCAFFOLD_1954=GI_6_2=SCAFFOLD_2053=GI_6_3	5585189	+	N	A	N	G	G	A	G	N	A	G	G	N	A	G	N	A	G	N	A	G	A	G	A	A	A	G	N	A	N	A	G	G	N	G	G	A	G	A	R	A	G
1729	1729	M1729	SCSC-11_GI_6_1=	A/G	3	CSC-11_GI_6_1=SCAFFOLD_1954=GI_6_2=SCAFFOLD_2053=GI_6_3	5668454	+	G	G	N	A	A	G	A	N	G	A	A	N	G	N	N	G	A	N	G	A	G	A	G	G	N	A	N	G	N	G	A	A	N	G	A	G	A	G	R	G	A
1730	1730	M1730	SCSC-11_GI_6_1=	C/T	3	CSC-11_GI_6_1=SCAFFOLD_1954=GI_6_2=SCAFFOLD_2053=GI_6_3	5668508	+	T	T	N	C	C	T	C	N	T	C	C	N	T	N	N	T	C	N	T	C	T	C	T	T	N	C	N	T	N	T	C	C	N	T	C	T	C	T	Y	T	C
1731	1731	M1731	SCSC-11_GI_6_1=	A/G	3	CSC-11_GI_6_1=SCAFFOLD_1954=GI_6_2=SCAFFOLD_2053=GI_6_3	5681603	+	N	G	N	A	A	G	A	N	G	A	A	N	G	N	N	G	A	N	G	A	G	A	G	G	N	A	N	G	N	G	A	A	N	G	A	G	A	G	A	G	A
1733	1733	M1733	SCSC-11_GI_6_1=	G/A	3	CSC-11_GI_6_1=SCAFFOLD_1954=GI_6_2=SCAFFOLD_2053=GI_6_3	5695715	+	N	A	A	G	G	A	G	N	A	G	G	N	A	N	N	A	G	N	A	G	A	G	A	A	N	G	N	A	N	A	G	G	N	A	G	A	G	A	R	A	G
1736	1736	M1736	SCSC-11_GI_6_1=	G/A	3	CSC-11_GI_6_1=SCAFFOLD_1954=GI_6_2=SCAFFOLD_2053=GI_6_3	5767218	+	N	A	N	G	G	A	G	N	A	G	G	N	A	N	N	A	G	N	A	G	A	G	A	A	A	G	N	A	N	A	G	G	N	A	G	A	G	A	R	A	G
1737	1737	M1737	SCSC-11_GI_6_1=	T/C	3	CSC-11_GI_6_1=SCAFFOLD_1954=GI_6_2=SCAFFOLD_2053=GI_6_3	5767264	+	N	C	N	T	T	C	T	N	C	T	T	N	C	N	N	C	T	N	C	T	C	T	C	C	N	T	N	C	N	C	T	T	N	C	T	C	T	C	T	C	T
1738	1738	M1738	SCSC-11_GI_6_1=	G/C	3	CSC-11_GI_6_1=SCAFFOLD_1954=GI_6_2=SCAFFOLD_2053=GI_6_3	5767277	+	N	C	N	G	G	C	G	N	C	G	G	N	C	N	N	C	G	N	C	G	C	G	C	C	N	G	N	C	N	C	G	G	N	C	G	C	G	C	G	C	G
1739	1739	M1739	SCSC-11_GI_6_1=	G/A	3	CSC-11_GI_6_1=SCAFFOLD_1954=GI_6_2=SCAFFOLD_2053=GI_6_3	5767287	+	N	A	N	G	G	A	G	N	A	G	G	N	A	N	N	A	G	N	A	G	A	G	A	A	N	G	N	A	N	A	G	G	N	A	G	A	G	A	G	A	G
1740	1740	M1740	SCSC-11_GI_6_1=	A/C	3	CSC-11_GI_6_1=SCAFFOLD_1954=GI_6_2=SCAFFOLD_2053=GI_6_3	5767313	+	N	C	N	A	A	C	A	N	C	A	A	N	C	N	N	C	A	N	C	A	C	A	C	C	N	A	N	C	N	C	A	A	N	C	A	C	A	C	A	C	A
1741	1741	M1741	SCSC-11_GI_6_1=	T/A	3	CSC-11_GI_6_1=SCAFFOLD_1954=GI_6_2=SCAFFOLD_2053=GI_6_3	5771466	+	N	A	N	T	T	A	T	N	A	T	T	N	A	N	N	A	T	N	A	T	A	T	A	A	N	T	N	A	N	A	T	T	N	A	T	A	N	A	W	A	T
1742	1742	M1742	SCSC-11_GI_6_1=	G/A	3	CSC-11_GI_6_1=SCAFFOLD_1954=GI_6_2=SCAFFOLD_2053=GI_6_3	5771472	+	N	A	N	G	G	A	G	N	A	G	G	N	A	N	N	A	G	N	A	G	A	G	A	A	N	G	N	A	N	A	G	G	N	A	G	A	N	A	R	A	G
1743	1743	M1743	SCSC-11_GI_6_1=	A/G	3	CSC-11_GI_6_1=SCAFFOLD_1954=GI_6_2=SCAFFOLD_2053=GI_6_3	5771485	+	N	G	N	A	A	G	A	N	G	A	A	N	G	N	N	G	A	N	G	A	G	A	G	G	N	A	N	G	N	G	A	A	N	G	A	G	N	G	R	G	A
1744	1744	M1744	SCSC-11_GI_6_1=	A/G	3	CSC-11_GI_6_1=SCAFFOLD_1954=GI_6_2=SCAFFOLD_2053=GI_6_3	5778286	+	N	G	N	A	A	G	A	N	G	A	A	N	G	N	N	G	A	N	G	A	G	A	G	G	N	A	N	G	N	G	A	A	N	G	A	G	A	G	R	G	A
1745	1745	M1745	SCSC-11_GI_6_1=	G/A	3	CSC-11_GI_6_1=SCAFFOLD_1954=GI_6_2=SCAFFOLD_2053=GI_6_3	5778292	+	N	A	N	G	G	A	G	N	A	G	G	N	A	N	N	A	G	N	A	G	A	G	A	A	N	G	N	A	N	A	G	G	N	A	G	A	G	A	R	A	G
1746	1746	M1746	SCSC-11_GI_6_1=	T/G	3	CSC-11_GI_6_1=SCAFFOLD_1954=GI_6_2=SCAFFOLD_2053=GI_6_3	5778412	+	G	G	N	T	T	G	T	N	G	T	T	N	G	N	N	G	T	N	G	T	G	T	G	G	N	T	N	G	N	G	T	T	N	G	T	G	T	G	K	G	T
1749	1749	M1749	SCSC-11_GI_6_1=	A/T	3	CSC-11_GI_6_1=SCAFFOLD_1954=GI_6_2=SCAFFOLD_2053=GI_6_3	5940421	+	N	T	N	A	A	T	A	N	T	A	A	N	T	N	N	T	A	N	T	A	T	A	T	T	N	A	N	T	N	T	A	A	N	T	A	T	A	A	T	T	A
1750	1750	M1750	SCSC-11_GI_6_1=	C/T	3	CSC-11_GI_6_1=SCAFFOLD_1954=GI_6_2=SCAFFOLD_2053=GI_6_3	5940433	+	N	T	N	C	C	T	C	N	T	C	C	N	T	N	N	T	C	N	T	C	T	C	T	T	N	C	N	T	N	T	C	C	N	T	C	T	C	C	T	T	C
1751	1751	M1751	SCSC-11_GI_6_1=	C/T	3	CSC-11_GI_6_1=SCAFFOLD_1954=GI_6_2=SCAFFOLD_2053=GI_6_3	5940729	+	N	T	N	C	C	N	C	N	T	C	C	N	T	N	N	T	C	N	T	C	T	C	T	T	N	C	N	T	N	T	C	C	N	T	C	T	C	C	T	T	C
1752	1752	M1752	SCSC-11_GI_6_1=	T/A	3	CSC-11_GI_6_1=SCAFFOLD_1954=GI_6_2=SCAFFOLD_2053=GI_6_3	5941263	+	N	A	N	T	T	A	T	N	A	T	T	N	A	N	N	A	T	N	A	T	A	T	A	A	N	T	N	A	N	A	T	T	N	A	T	A	T	T	A	A	T
1753	1753	M1753	SCSC-11_GI_6_1=	G/A	3	CSC-11_GI_6_1=SCAFFOLD_1954=GI_6_2=SCAFFOLD_2053=GI_6_3	5941743	+	N	A	N	G	G	A	G	N	A	G	G	N	A	N	N	A	G	N	A	G	A	G	A	A	A	G	N	A	N	A	G	G	N	A	G	A	G	G	A	A	G
1754	1754	M1754	SCSC-11_GI_6_1=	A/T	3	CSC-11_GI_6_1=SCAFFOLD_1954=GI_6_2=SCAFFOLD_2053=GI_6_3	5941749	+	N	T	N	A	A	T	A	N	T	A	A	N	T	N	N	T	A	N	T	A	T	A	T	T	T	A	N	T	N	T	A	A	N	T	A	T	A	A	T	T	A
1755	1755	M1755	SCSC-11_GI_6_1=	C/G	3	CSC-11_GI_6_1=SCAFFOLD_1954=GI_6_2=SCAFFOLD_2053=GI_6_3	5946148	+	G	G	N	C	C	G	C	N	G	G	C	N	G	N	N	G	C	N	G	C	G	C	G	G	N	C	N	G	N	G	C	C	N	G	C	G	C	C	G	G	C
1757	1757	M1757	SCSC-11_GI_6_1=	C/T	3	CSC-11_GI_6_1=SCAFFOLD_1954=GI_6_2=SCAFFOLD_2053=GI_6_3	6046407	+	N	T	N	C	C	T	C	N	T	T	C	N	T	N	N	T	T	N	T	C	T	C	T	T	T	C	N	T	N	T	C	C	N	T	C	T	C	C	T	T	C
1758	1758	M1758	SCSC-11_GI_6_1=	T/C	3	CSC-11_GI_6_1=SCAFFOLD_1954=GI_6_2=SCAFFOLD_2053=GI_6_3	6046419	+	N	C	N	T	T	C	T	N	C	C	T	N	C	N	N	C	C	N	C	T	C	T	C	C	C	T	N	C	N	C	T	T	N	C	T	C	T	T	C	C	T
1759	1759	M1759	SCSC-11_GI_6_1=	A/T	3	CSC-11_GI_6_1=SCAFFOLD_1954=GI_6_2=SCAFFOLD_2053=GI_6_3	6055860	+	N	T	N	A	A	T	A	N	T	T	A	N	T	N	N	T	T	N	T	A	T	A	T	T	N	A	N	T	N	T	A	A	N	T	A	T	A	A	T	T	A
1760	1760	M1760	SCSC-11_GI_6_1=	A/C	3	CSC-11_GI_6_1=SCAFFOLD_1954=GI_6_2=SCAFFOLD_2053=GI_6_3	6055865	+	N	C	N	A	A	C	A	N	C	C	A	N	C	N	N	C	C	N	C	A	C	A	C	C	N	A	N	C	N	C	A	A	N	C	A	C	A	A	C	C	A
1761	1761	M1761	SCSC-11_GI_6_1=	T/C	3	CSC-11_GI_6_1=SCAFFOLD_1954=GI_6_2=SCAFFOLD_2053=GI_6_3	6056070	+	N	C	N	T	T	C	T	N	C	C	T	N	C	N	N	C	C	N	C	T	C	T	C	C	C	T	N	C	N	C	T	T	N	C	T	C	T	T	C	C	T
1762	1762	M1762	SCSC-11_GI_6_1=	T/C	3	CSC-11_GI_6_1=SCAFFOLD_1954=GI_6_2=SCAFFOLD_2053=GI_6_3	6145279	+	N	C	N	T	T	C	T	N	C	C	T	N	C	N	N	C	C	N	C	T	C	T	C	C	C	T	N	C	N	C	T	T	N	C	T	C	T	T	C	C	T
1763	1763	M1763	SCSC-11_GI_6_1=	T/A	3	CSC-11_GI_6_1=SCAFFOLD_1954=GI_6_2=SCAFFOLD_2053=GI_6_3	6148079	+	N	A	N	T	T	A	T	N	A	A	T	N	A	N	N	A	A	N	A	T	A	T	T	A	A	T	N	A	N	A	T	T	N	A	T	A	T	T	A	A	T
1765	1765	M1765	SCSC-11_GI_6_1=	A/T	3	CSC-11_GI_6_1=SCAFFOLD_1954=GI_6_2=SCAFFOLD_2053=GI_6_3	6250528	+	N	T	N	A	A	T	A	N	T	T	A	N	T	N	N	A	T	N	T	A	T	A	A	T	N	A	N	T	N	T	A	A	N	T	A	T	W	A	T	T	A
1766	1766	M1766	SCSC-11_GI_6_1=	G/T	3	CSC-11_GI_6_1=SCAFFOLD_1954=GI_6_2=SCAFFOLD_2053=GI_6_3	6251140	+	T	T	N	G	G	T	G	N	T	T	G	N	T	N	N	G	T	N	T	G	T	G	G	T	T	G	N	T	N	T	G	G	N	T	G	T	K	G	T	T	G
1768	1768	M1768	SCSC-11_GI_6_1=	C/T	3	CSC-11_GI_6_1=SCAFFOLD_1954=GI_6_2=SCAFFOLD_2053=GI_6_3	6295626	+	N	T	N	C	C	T	C	N	T	T	C	N	T	N	N	C	T	N	T	C	T	C	C	T	T	C	N	T	N	T	C	C	N	T	C	T	Y	C	T	T	C
1769	1769	M1769	SCSC-11_GI_6_1=	G/A	3	CSC-11_GI_6_1=SCAFFOLD_1954=GI_6_2=SCAFFOLD_2053=GI_6_3	6295662	+	N	A	N	G	G	A	G	N	A	A	G	N	A	N	N	G	A	N	A	G	A	G	G	A	A	G	N	A	N	A	G	G	N	A	G	A	R	G	A	A	G
1773	1773	M1773	SCSC-11_GI_6_1=	G/T	3	CSC-11_GI_6_1=SCAFFOLD_1954=GI_6_2=SCAFFOLD_2053=GI_6_3	6341337	+	N	T	N	G	T	T	G	N	T	G	G	N	T	N	N	G	T	N	T	G	G	G	G	T	T	G	N	T	N	T	G	G	N	T	G	T	K	G	T	T	G
1774	1774	M1774	SCSC-11_GI_6_1=	T/G	3	CSC-11_GI_6_1=SCAFFOLD_1954=GI_6_2=SCAFFOLD_2053=GI_6_3	6341382	+	N	G	N	T	G	G	T	N	G	T	T	N	G	N	N	T	G	N	G	T	T	T	T	G	N	T	N	G	N	G	T	T	N	G	T	G	K	T	G	G	T
1775	1775	M1775	SCSC-11_GI_6_1=	C/T	3	CSC-11_GI_6_1=SCAFFOLD_1954=GI_6_2=SCAFFOLD_2053=GI_6_3	6341421	+	N	T	N	C	T	T	C	N	T	C	C	N	T	N	N	C	T	N	T	C	C	C	C	T	N	C	N	T	N	T	C	C	N	T	C	T	Y	C	T	T	C
1776	1776	M1776	SCSC-11_GI_6_1=	G/A	3	CSC-11_GI_6_1=SCAFFOLD_1954=GI_6_2=SCAFFOLD_2053=GI_6_3	6366419	+	N	A	A	G	A	A	G	N	A	G	G	N	A	N	N	G	A	N	A	G	G	G	G	A	A	G	N	A	N	R	G	G	N	A	G	A	R	G	A	A	G
1781	1781	M1781	SCSC-11_GI_6_1=	T/C	3	CSC-11_GI_6_1=SCAFFOLD_1954=GI_6_2=SCAFFOLD_2053=GI_6_3	6366555	+	N	C	N	T	C	C	T	N	C	T	T	N	C	N	N	T	C	N	C	T	T	T	T	C	N	T	N	C	N	C	T	T	N	C	T	C	Y	T	C	C	T
1782	1782	M1782	SCSC-11_GI_6_1=	C/A	3	CSC-11_GI_6_1=SCAFFOLD_1954=GI_6_2=SCAFFOLD_2053=GI_6_3	6366559	+	N	A	N	C	A	A	C	N	A	C	C	N	A	N	N	C	A	N	A	C	C	C	C	A	N	C	N	A	N	A	C	C	N	A	C	A	M	C	A	A	C
1784	1784	M1784	SCSC-11_GI_6_1=	C/G	3	CSC-11_GI_6_1=SCAFFOLD_1954=GI_6_2=SCAFFOLD_2053=GI_6_3	6404584	+	N	G	N	C	G	G	C	N	G	C	C	N	G	N	N	C	G	N	G	C	C	C	C	G	G	C	N	G	N	G	C	C	N	G	C	G	S	C	G	G	C
1785	1785	M1785	SCSC-11_GI_6_1=	G/A	3	CSC-11_GI_6_1=SCAFFOLD_1954=GI_6_2=SCAFFOLD_2053=GI_6_3	6404591	+	N	A	N	G	A	A	G	N	A	G	G	N	A	N	N	G	A	N	A	G	G	G	G	A	A	G	N	A	N	A	G	G	N	A	G	A	R	G	A	A	G
1786	1786	M1786	SCSC-11_GI_6_1=	A/G	3	CSC-11_GI_6_1=SCAFFOLD_1954=GI_6_2=SCAFFOLD_2053=GI_6_3	6478384	+	N	G	N	A	G	G	G	N	G	A	A	N	G	N	N	A	G	N	G	A	A	A	G	G	G	A	N	G	N	G	A	A	N	G	A	G	R	A	G	G	A
1787	1787	M1787	SCSC-11_GI_6_1=	G/A	3	CSC-11_GI_6_1=SCAFFOLD_1954=GI_6_2=SCAFFOLD_2053=GI_6_3	6482674	+	N	A	N	G	A	A	A	N	A	G	G	N	A	N	N	G	A	N	A	G	G	G	A	A	N	G	N	A	N	A	G	G	N	A	G	A	R	G	A	A	G
1788	1788	M1788	SCSC-11_GI_6_1=	G/A	3	CSC-11_GI_6_1=SCAFFOLD_1954=GI_6_2=SCAFFOLD_2053=GI_6_3	6482794	+	N	A	N	G	A	A	A	N	A	G	G	N	A	N	N	G	A	N	A	G	G	G	A	A	N	G	N	A	N	A	G	G	N	A	G	A	R	G	A	A	G
1790	1790	M1790	SCSC-11_GI_6_1=	C/T	3	CSC-11_GI_6_1=SCAFFOLD_1954=GI_6_2=SCAFFOLD_2053=GI_6_3	6749130	+	N	T	N	C	T	T	T	N	T	C	C	N	T	N	N	C	T	N	T	C	T	C	C	C	T	C	N	T	N	T	C	C	N	T	C	T	C	C	T	T	C
1791	1791	M1791	SCSC-11_GI_6_1=	T/C	3	CSC-11_GI_6_1=SCAFFOLD_1954=GI_6_2=SCAFFOLD_2053=GI_6_3	6769017	+	N	C	N	T	C	C	C	N	C	T	T	N	C	N	N	T	C	N	C	T	C	T	T	T	C	T	N	C	N	C	T	T	N	C	T	C	T	T	C	C	T
1792	1792	M1792	SCSC-11_GI_6_1=	G/A	3	CSC-11_GI_6_1=SCAFFOLD_1954=GI_6_2=SCAFFOLD_2053=GI_6_3	6779735	+	G	A	N	G	A	A	A	N	A	G	G	N	A	N	N	G	A	N	A	G	A	G	G	G	A	G	N	A	N	A	G	G	N	A	G	A	G	G	A	A	G
1793	1793	M1793	SCSC-11_GI_6_1=	C/A	3	CSC-11_GI_6_1=SCAFFOLD_1954=GI_6_2=SCAFFOLD_2053=GI_6_3	6779749	+	C	A	N	C	A	A	A	N	A	C	C	N	A	N	N	C	A	N	A	C	A	C	C	C	A	C	N	A	N	A	C	C	N	A	C	A	C	C	A	A	C
1794	1794	M1794	SCSC-11_GI_6_1=	A/G	3	CSC-11_GI_6_1=SCAFFOLD_1954=GI_6_2=SCAFFOLD_2053=GI_6_3	6779786	+	A	G	N	A	G	G	G	N	G	A	A	N	G	N	N	A	G	N	G	A	G	A	A	A	G	A	N	G	N	G	A	A	N	G	A	G	A	A	G	G	A
1795	1795	M1795	SCSC-11_GI_6_1=	T/C	3	CSC-11_GI_6_1=SCAFFOLD_1954=GI_6_2=SCAFFOLD_2053=GI_6_3	6786068	+	N	C	N	T	C	C	C	N	C	T	T	N	C	N	N	T	C	N	C	T	C	T	T	T	C	T	N	C	N	C	T	T	N	C	T	C	T	T	C	C	T
1796	1796	M1796	SCSC-11_GI_6_1=	C/A	3	CSC-11_GI_6_1=SCAFFOLD_1954=GI_6_2=SCAFFOLD_2053=GI_6_3	6786089	+	N	A	N	C	A	A	A	N	A	C	C	N	A	N	N	C	A	N	A	C	A	C	C	C	A	C	N	A	N	A	C	C	N	A	C	A	C	C	A	A	C
1797	1797	M1797	SCSC-11_GI_6_1=	A/C	3	CSC-11_GI_6_1=SCAFFOLD_1954=GI_6_2=SCAFFOLD_2053=GI_6_3	6786092	+	N	C	N	A	C	C	C	N	C	A	A	N	C	N	N	A	C	N	C	A	C	A	A	A	C	A	N	C	N	C	A	A	N	C	A	C	A	A	C	C	A
1798	1798	M1798	SCSC-11_GI_6_1=	C/A	3	CSC-11_GI_6_1=SCAFFOLD_1954=GI_6_2=SCAFFOLD_2053=GI_6_3	6786361	+	N	A	N	C	A	A	A	N	A	C	C	N	A	N	N	C	A	N	A	C	A	C	C	C	N	C	N	A	N	A	C	C	N	A	C	A	C	C	A	A	C
1799	1799	M1799	SCSC-11_GI_6_1=	C/T	3	CSC-11_GI_6_1=SCAFFOLD_1954=GI_6_2=SCAFFOLD_2053=GI_6_3	6787533	+	N	T	N	C	T	T	T	N	T	C	C	N	T	N	N	C	T	N	T	C	T	C	C	C	N	C	N	T	N	T	C	C	N	T	C	T	C	C	T	T	C
1800	1800	M1800	SCSC-11_GI_6_1=	G/A	3	CSC-11_GI_6_1=SCAFFOLD_1954=GI_6_2=SCAFFOLD_2053=GI_6_3	6787535	+	N	A	N	G	A	A	A	N	A	G	G	N	A	N	N	G	A	N	A	G	A	G	G	G	N	G	N	A	N	A	G	G	N	A	G	A	G	G	A	A	G
1801	1801	M1801	SCSC-11_GI_6_1=	C/A	3	CSC-11_GI_6_1=SCAFFOLD_1954=GI_6_2=SCAFFOLD_2053=GI_6_3	6787675	+	N	A	N	C	A	A	A	N	A	C	C	N	A	N	N	C	A	N	A	C	A	C	C	C	A	C	N	A	N	A	C	C	N	A	C	A	C	C	A	A	C
1802	1802	M1802	SCSC-11_GI_6_1=	A/G	3	CSC-11_GI_6_1=SCAFFOLD_1954=GI_6_2=SCAFFOLD_2053=GI_6_3	6787687	+	N	G	N	A	G	G	G	N	G	A	A	N	G	N	N	A	G	N	G	A	G	A	A	A	G	A	N	G	N	G	A	A	N	G	A	G	A	A	G	G	A
1803	1803	M1803	SCSC-11_GI_6_1=	C/T	3	CSC-11_GI_6_1=SCAFFOLD_1954=GI_6_2=SCAFFOLD_2053=GI_6_3	6787715	+	N	T	N	C	T	T	T	N	T	C	C	N	T	N	N	C	T	N	T	C	T	C	C	C	T	C	N	T	N	T	C	C	N	T	C	T	C	C	T	T	C
1804	1804	M1804	SCSC-11_GI_6_1=	G/T	3	CSC-11_GI_6_1=SCAFFOLD_1954=GI_6_2=SCAFFOLD_2053=GI_6_3	6790243	+	N	T	N	G	T	T	T	N	T	G	G	N	T	N	N	G	T	N	T	G	T	G	G	G	T	G	N	T	N	T	G	G	N	T	G	T	G	G	T	T	G
1805	1805	M1805	SCSC-11_GI_6_1=	G/A	3	CSC-11_GI_6_1=SCAFFOLD_1954=GI_6_2=SCAFFOLD_2053=GI_6_3	6790246	+	N	A	N	G	A	A	A	N	A	G	G	N	A	N	N	G	A	N	A	G	A	G	G	G	A	G	N	A	N	A	G	G	N	A	G	A	G	G	A	A	G
1806	1806	M1806	SCSC-11_GI_6_1=	T/C	3	CSC-11_GI_6_1=SCAFFOLD_1954=GI_6_2=SCAFFOLD_2053=GI_6_3	6790366	+	N	C	N	T	C	C	C	N	C	T	T	N	C	N	N	T	C	N	C	T	C	T	T	T	C	T	N	C	N	C	T	T	N	C	T	C	T	T	C	C	T
1807	1807	M1807	SCSC-11_GI_6_1=	C/T	3	CSC-11_GI_6_1=SCAFFOLD_1954=GI_6_2=SCAFFOLD_2053=GI_6_3	6790381	+	N	T	N	C	T	T	T	N	T	C	C	N	T	N	N	C	T	N	T	C	T	C	C	C	T	C	N	T	N	T	C	C	N	T	C	T	C	C	T	T	C
1808	1808	M1808	SCSC-11_GI_6_1=	C/T	3	CSC-11_GI_6_1=SCAFFOLD_1954=GI_6_2=SCAFFOLD_2053=GI_6_3	6870461	+	C	T	N	C	T	T	T	N	T	C	C	N	T	N	N	C	C	N	T	C	T	C	C	C	N	C	N	T	N	T	C	C	N	T	C	T	C	C	T	T	C
1809	1809	M1809	SCSC-11_GI_6_1=	A/T	3	CSC-11_GI_6_1=SCAFFOLD_1954=GI_6_2=SCAFFOLD_2053=GI_6_3	6870462	+	A	T	N	A	T	T	T	N	T	A	A	N	T	N	N	A	A	N	T	A	T	A	A	A	N	A	N	T	N	T	A	A	N	T	A	T	A	A	T	T	A
1810	1810	M1810	SCSC-11_GI_6_1=	A/T	3	CSC-11_GI_6_1=SCAFFOLD_1954=GI_6_2=SCAFFOLD_2053=GI_6_3	6870494	+	A	T	N	A	T	T	T	N	T	A	A	N	T	N	N	A	A	N	T	A	T	A	A	A	N	A	N	T	N	T	A	A	N	T	A	T	A	A	T	T	A
1811	1811	M1811	SCSC-11_GI_6_1=	G/A	3	CSC-11_GI_6_1=SCAFFOLD_1954=GI_6_2=SCAFFOLD_2053=GI_6_3	6887855	+	N	A	N	G	A	A	A	N	A	G	G	N	A	N	N	G	G	N	A	G	A	G	G	G	A	G	N	A	N	A	G	G	N	A	G	A	G	G	A	A	G
1813	1813	M1813	SCSC-11_GI_6_1=	A/G	3	CSC-11_GI_6_1=SCAFFOLD_1954=GI_6_2=SCAFFOLD_2053=GI_6_3	7033028	+	N	G	N	A	G	G	A	N	G	A	A	N	G	N	N	A	A	N	G	A	G	A	A	G	N	A	N	G	N	G	A	A	N	G	A	G	A	A	G	G	A
1815	1815	M1815	SCSC-11_GI_6_1=	C/A	3	CSC-11_GI_6_1=SCAFFOLD_1954=GI_6_2=SCAFFOLD_2053=GI_6_3	7053959	+	N	A	N	C	A	A	C	N	A	C	C	N	A	N	N	C	C	N	A	C	A	C	C	A	A	C	N	A	N	A	C	C	N	A	C	A	C	C	A	A	C
1816	1816	M1816	SCSC-11_GI_6_1=	T/G	3	CSC-11_GI_6_1=SCAFFOLD_1954=GI_6_2=SCAFFOLD_2053=GI_6_3	7053976	+	N	G	N	T	G	G	T	N	G	T	T	N	G	N	N	T	T	N	G	T	G	T	T	G	G	T	N	G	N	G	T	T	N	G	T	G	T	T	G	G	T
1817	1817	M1817	SCSC-11_GI_6_1=	A/G	3	CSC-11_GI_6_1=SCAFFOLD_1954=GI_6_2=SCAFFOLD_2053=GI_6_3	7054105	+	N	G	N	A	G	G	A	N	G	A	A	N	G	N	N	A	A	N	G	A	G	A	A	G	N	A	N	G	N	G	A	A	N	G	A	G	A	A	G	G	A
1818	1818	M1818	SCSC-11_GI_6_1=	C/T	3	CSC-11_GI_6_1=SCAFFOLD_1954=GI_6_2=SCAFFOLD_2053=GI_6_3	7063483	+	N	T	N	C	T	T	C	N	T	C	C	N	T	N	N	C	C	N	T	C	T	C	C	T	N	C	N	T	N	T	C	C	N	T	C	T	C	C	T	T	C
1819	1819	M1819	SCSC-11_GI_6_1=	T/A	3	CSC-11_GI_6_1=SCAFFOLD_1954=GI_6_2=SCAFFOLD_2053=GI_6_3	7091472	+	T	A	N	T	A	A	T	N	A	T	T	N	A	N	N	T	T	N	A	T	A	T	T	A	A	T	N	A	N	A	T	T	N	A	T	A	T	T	A	A	T
1820	1820	M1820	SCSC-11_GI_6_1=	T/C	3	CSC-11_GI_6_1=SCAFFOLD_1954=GI_6_2=SCAFFOLD_2053=GI_6_3	7116720	+	N	C	N	T	C	C	T	N	C	T	T	N	C	N	N	T	T	N	C	T	C	T	T	C	C	T	N	C	N	C	T	T	N	C	T	C	T	T	C	C	T
1821	1821	M1821	SCSC-11_GI_6_1=	A/G	3	CSC-11_GI_6_1=SCAFFOLD_1954=GI_6_2=SCAFFOLD_2053=GI_6_3	7131193	+	N	G	N	A	G	G	A	N	G	A	A	G	G	N	N	A	A	N	G	A	G	A	A	G	N	A	N	G	N	G	A	A	N	G	A	G	A	A	G	G	A
1822	1822	M1822	SCSC-11_GI_6_1=	C/A	3	CSC-11_GI_6_1=SCAFFOLD_1954=GI_6_2=SCAFFOLD_2053=GI_6_3	7137885	+	N	A	N	C	A	A	C	N	A	C	C	N	A	N	N	C	C	N	A	C	A	C	C	A	N	C	N	A	N	A	C	C	N	A	C	A	C	C	A	A	C
1823	1823	M1823	SCSC-11_GI_6_1=	C/A	3	CSC-11_GI_6_1=SCAFFOLD_1954=GI_6_2=SCAFFOLD_2053=GI_6_3	7137886	+	N	A	N	C	A	A	C	N	A	C	C	N	A	N	N	C	C	N	A	C	A	C	C	A	N	C	N	A	N	A	C	C	N	A	C	A	C	C	A	A	C
1824	1824	M1824	SCSC-11_GI_6_1=	C/A	3	CSC-11_GI_6_1=SCAFFOLD_1954=GI_6_2=SCAFFOLD_2053=GI_6_3	7137891	+	N	A	N	C	A	A	C	N	A	C	C	N	A	N	N	C	C	N	A	C	A	C	C	A	N	C	N	A	N	A	C	C	N	A	C	A	C	C	A	A	C
1825	1825	M1825	SCSC-11_GI_6_1=	C/A	3	CSC-11_GI_6_1=SCAFFOLD_1954=GI_6_2=SCAFFOLD_2053=GI_6_3	7137892	+	N	A	N	C	A	A	C	N	A	C	C	N	A	N	N	C	C	N	A	C	A	C	C	A	N	C	N	A	N	A	C	C	N	A	C	A	C	C	A	A	C
1826	1826	M1826	SCSC-11_GI_6_1=	T/C	3	CSC-11_GI_6_1=SCAFFOLD_1954=GI_6_2=SCAFFOLD_2053=GI_6_3	7138031	+	N	C	N	T	C	C	T	N	C	T	T	N	C	N	N	T	T	N	C	T	C	T	T	C	N	T	N	C	N	C	T	T	N	C	T	C	T	T	C	C	T
1827	1827	M1827	SCSC-11_GI_6_1=	C/G	3	CSC-11_GI_6_1=SCAFFOLD_1954=GI_6_2=SCAFFOLD_2053=GI_6_3	7138308	+	N	G	N	C	G	G	C	N	G	C	C	N	G	N	N	C	C	N	G	C	G	C	C	G	G	C	N	G	N	G	C	C	N	G	C	G	C	C	G	G	C
1828	1828	M1828	SCSC-11_GI_6_1=	T/C	3	CSC-11_GI_6_1=SCAFFOLD_1954=GI_6_2=SCAFFOLD_2053=GI_6_3	7138313	+	N	C	N	T	C	C	T	N	C	T	T	N	C	N	N	T	T	N	C	T	C	T	T	C	C	T	N	C	N	C	T	T	N	C	T	C	T	T	C	C	T
1829	1829	M1829	SCSC-11_GI_6_1=	T/C	3	CSC-11_GI_6_1=SCAFFOLD_1954=GI_6_2=SCAFFOLD_2053=GI_6_3	7138319	+	N	C	N	T	C	C	T	N	C	T	T	N	C	N	N	T	T	N	C	T	C	T	T	C	C	T	N	C	N	C	T	T	N	C	T	C	T	T	C	C	T
1830	1830	M1830	SCSC-11_GI_6_1=	A/G	3	CSC-11_GI_6_1=SCAFFOLD_1954=GI_6_2=SCAFFOLD_2053=GI_6_3	7138322	+	N	G	N	A	G	G	A	N	G	A	A	N	G	N	N	A	A	N	G	A	G	A	A	G	G	A	N	G	N	G	A	A	N	G	A	G	A	A	G	G	A
1831	1831	M1831	SCSC-11_GI_6_1=	T/C	3	CSC-11_GI_6_1=SCAFFOLD_1954=GI_6_2=SCAFFOLD_2053=GI_6_3	7176246	+	N	C	N	T	C	C	T	N	C	T	T	N	C	N	N	T	T	N	C	T	C	T	T	C	C	T	N	C	N	C	T	T	N	C	T	C	T	T	C	C	T
1832	1832	M1832	SCSC-11_GI_6_1=	A/T	3	CSC-11_GI_6_1=SCAFFOLD_1954=GI_6_2=SCAFFOLD_2053=GI_6_3	7176250	+	N	T	N	A	T	T	A	N	T	A	A	N	T	N	N	A	A	N	T	A	T	A	A	T	T	A	N	T	N	T	A	A	N	T	A	T	A	A	T	T	A
1833	1833	M1833	SCSC-11_GI_6_1=	G/A	3	CSC-11_GI_6_1=SCAFFOLD_1954=GI_6_2=SCAFFOLD_2053=GI_6_3	7176272	+	N	A	N	G	A	A	G	N	A	G	G	N	A	N	N	G	G	N	A	G	A	G	G	A	A	G	N	A	N	A	G	G	N	A	G	A	G	G	A	A	G
1834	1834	M1834	SCSC-11_GI_6_1=	A/T	3	CSC-11_GI_6_1=SCAFFOLD_1954=GI_6_2=SCAFFOLD_2053=GI_6_3	7190608	+	A	T	N	A	T	T	A	N	T	A	A	N	T	N	N	A	A	N	T	A	T	A	A	T	T	A	N	T	N	T	A	A	N	T	A	T	A	A	T	T	A
1839	1839	M1839	SCSC-11_GI_6_1=	A/G	3	CSC-11_GI_6_1=SCAFFOLD_1954=GI_6_2=SCAFFOLD_2053=GI_6_3	7190767	+	N	G	N	A	G	G	A	N	G	A	A	N	G	N	N	A	A	N	G	A	G	A	A	G	G	A	N	G	N	G	A	A	N	G	A	G	A	A	G	G	A
1840	1840	M1840	SCSC-11_GI_6_1=	G/T	3	CSC-11_GI_6_1=SCAFFOLD_1954=GI_6_2=SCAFFOLD_2053=GI_6_3	7197201	+	N	T	N	G	T	T	G	N	T	G	G	N	T	N	N	G	G	N	T	G	T	G	G	T	T	G	N	T	N	T	G	G	N	T	G	T	G	G	T	T	G
1841	1841	M1841	SCSC-11_GI_6_1=	A/T	3	CSC-11_GI_6_1=SCAFFOLD_1954=GI_6_2=SCAFFOLD_2053=GI_6_3	7197229	+	N	T	N	A	T	T	A	N	T	A	A	N	T	N	N	A	A	N	T	A	T	A	A	T	T	A	N	T	N	T	A	A	N	T	A	T	A	A	T	T	A
1842	1842	M1842	SCSC-11_GI_6_1=	C/T	3	CSC-11_GI_6_1=SCAFFOLD_1954=GI_6_2=SCAFFOLD_2053=GI_6_3	7197235	+	N	T	N	C	T	T	C	N	T	C	C	N	T	N	N	C	C	N	T	C	T	C	C	T	T	C	N	T	N	T	C	C	N	T	C	T	C	C	T	T	C
1843	1843	M1843	SCSC-11_GI_6_1=	G/A	3	CSC-11_GI_6_1=SCAFFOLD_1954=GI_6_2=SCAFFOLD_2053=GI_6_3	7212676	+	G	A	N	G	A	A	G	N	A	G	G	N	A	N	N	G	G	N	A	G	A	G	G	A	N	G	N	A	N	A	G	G	N	A	G	A	G	G	A	A	G
1844	1844	M1844	SCSC-11_GI_6_1=	C/T	3	CSC-11_GI_6_1=SCAFFOLD_1954=GI_6_2=SCAFFOLD_2053=GI_6_3	7212682	+	C	T	N	C	T	T	C	N	T	C	C	N	T	N	N	C	C	N	T	C	T	C	C	T	N	C	N	T	N	T	C	C	N	T	C	T	C	C	T	T	C
1845	1845	M1845	SCSC-11_GI_6_1=	A/G	3	CSC-11_GI_6_1=SCAFFOLD_1954=GI_6_2=SCAFFOLD_2053=GI_6_3	7212922	+	N	G	N	A	G	G	A	N	G	A	A	N	G	N	N	A	A	N	G	A	G	A	A	G	N	A	N	G	N	G	A	A	N	G	A	G	A	A	G	G	A
1846	1846	M1846	SCSC-11_GI_6_1=	T/A	3	CSC-11_GI_6_1=SCAFFOLD_1954=GI_6_2=SCAFFOLD_2053=GI_6_3	7428852	+	N	A	N	T	A	A	T	N	A	T	T	N	A	N	N	T	T	N	A	T	A	T	T	A	A	T	N	A	N	A	T	T	N	A	T	A	T	A	A	A	T
1847	1847	M1847	SCSC-11_GI_6_1=	G/A	3	CSC-11_GI_6_1=SCAFFOLD_1954=GI_6_2=SCAFFOLD_2053=GI_6_3	7428882	+	N	A	N	G	A	A	G	N	A	G	G	N	A	N	N	G	G	N	A	G	A	G	G	A	A	G	N	A	N	A	G	G	N	A	G	A	G	A	A	A	G
1848	1848	M1848	SCSC-11_GI_6_1=	A/T	3	CSC-11_GI_6_1=SCAFFOLD_1954=GI_6_2=SCAFFOLD_2053=GI_6_3	7428891	+	N	T	N	A	T	T	A	N	T	A	A	N	T	N	N	A	A	N	T	A	T	A	A	T	T	A	N	T	N	T	A	A	N	T	A	T	A	T	T	T	A
1849	1849	M1849	SCSC-11_GI_6_1=	T/C	3	CSC-11_GI_6_1=SCAFFOLD_1954=GI_6_2=SCAFFOLD_2053=GI_6_3	7440819	+	N	C	N	T	C	C	T	N	C	T	T	N	C	N	N	T	T	N	C	T	C	T	T	C	C	T	N	C	N	C	T	T	N	C	T	C	T	C	C	C	T
1850	1850	M1850	SCSC-11_GI_6_1=	A/G	3	CSC-11_GI_6_1=SCAFFOLD_1954=GI_6_2=SCAFFOLD_2053=GI_6_3	7440822	+	N	G	N	A	G	G	A	N	G	A	A	N	G	N	N	A	A	N	G	A	G	A	A	G	G	A	N	G	N	G	A	A	N	G	A	G	A	G	G	G	A
1851	1851	M1851	SCSC-11_GI_6_1=	A/C	3	CSC-11_GI_6_1=SCAFFOLD_1954=GI_6_2=SCAFFOLD_2053=GI_6_3	7440831	+	N	C	N	A	C	C	A	N	C	A	A	N	C	N	N	A	A	N	C	A	C	A	A	C	C	A	N	C	N	C	A	A	N	C	A	C	A	C	C	C	A
1852	1852	M1852	SCSC-11_GI_6_1=	C/G	3	CSC-11_GI_6_1=SCAFFOLD_1954=GI_6_2=SCAFFOLD_2053=GI_6_3	7495243	+	N	G	N	C	G	G	C	N	G	C	C	N	G	N	N	C	C	N	G	C	G	C	C	G	N	C	N	G	N	G	C	C	N	G	C	G	C	G	G	G	C
1853	1853	M1853	SCSC-11_GI_6_1=	A/G	3	CSC-11_GI_6_1=SCAFFOLD_1954=GI_6_2=SCAFFOLD_2053=GI_6_3	7521001	+	N	G	N	A	G	G	A	N	G	A	A	N	G	N	N	A	A	N	G	A	G	A	A	G	G	A	N	G	N	G	A	A	N	G	A	G	A	G	G	G	A
1854	1854	M1854	SCSC-11_GI_6_1=	C/T	3	CSC-11_GI_6_1=SCAFFOLD_1954=GI_6_2=SCAFFOLD_2053=GI_6_3	7557188	+	N	T	T	C	T	T	C	N	T	C	C	N	T	N	N	C	C	N	T	C	T	C	C	T	T	C	N	T	N	T	C	C	N	T	C	T	C	T	T	T	C
1855	1855	M1855	SCSC-11_GI_6_1=	T/A	3	CSC-11_GI_6_1=SCAFFOLD_1954=GI_6_2=SCAFFOLD_2053=GI_6_3	7557218	+	N	A	A	T	A	A	T	N	A	T	T	N	A	N	N	T	T	N	A	T	A	T	T	A	A	T	N	A	N	A	T	T	N	A	T	A	T	A	A	A	T
1856	1856	M1856	SCSC-11_GI_6_1=	A/T	3	CSC-11_GI_6_1=SCAFFOLD_1954=GI_6_2=SCAFFOLD_2053=GI_6_3	7566843	+	N	T	N	A	T	T	A	N	T	A	A	N	T	N	N	A	N	N	T	A	T	A	A	T	N	A	N	T	N	T	A	A	N	T	A	T	A	T	T	T	A
1857	1857	M1857	SCSC-11_GI_6_1=	C/A	3	CSC-11_GI_6_1=SCAFFOLD_1954=GI_6_2=SCAFFOLD_2053=GI_6_3	7566876	+	N	A	N	C	A	A	C	N	A	C	C	N	A	N	N	C	C	N	A	C	A	C	C	A	A	C	N	A	N	A	C	C	N	A	C	A	C	A	A	A	C
1858	1858	M1858	SCSC-11_GI_6_1=	A/C	3	CSC-11_GI_6_1=SCAFFOLD_1954=GI_6_2=SCAFFOLD_2053=GI_6_3	7626384	+	N	C	N	A	C	C	A	N	C	A	A	N	C	N	N	A	A	N	C	A	C	A	A	C	C	A	N	C	N	C	A	A	N	C	A	C	A	C	C	C	A
1859	1859	M1859	SCSC-11_GI_6_1=	A/C	3	CSC-11_GI_6_1=SCAFFOLD_1954=GI_6_2=SCAFFOLD_2053=GI_6_3	7626407	+	N	C	N	A	C	C	A	N	C	A	A	N	C	N	N	A	A	N	C	A	C	A	A	C	C	A	N	C	N	C	A	A	N	C	A	C	A	C	C	C	A
1860	1860	M1860	SCSC-11_GI_6_1=	A/T	3	CSC-11_GI_6_1=SCAFFOLD_1954=GI_6_2=SCAFFOLD_2053=GI_6_3	7635404	+	N	T	N	A	T	T	A	N	T	A	A	N	T	N	N	A	A	N	T	A	T	A	A	T	T	A	N	T	N	T	A	A	N	T	A	T	A	T	T	T	A
1861	1861	M1861	SCSC-11_GI_6_1=	C/T	3	CSC-11_GI_6_1=SCAFFOLD_1954=GI_6_2=SCAFFOLD_2053=GI_6_3	7729946	+	N	T	N	C	T	T	C	N	T	N	C	N	T	N	N	C	C	N	T	C	T	C	C	T	N	C	N	T	N	T	C	C	N	T	T	T	C	T	T	T	C
1862	1862	M1862	SCSC-11_GI_6_1=	A/G	3	CSC-11_GI_6_1=SCAFFOLD_1954=GI_6_2=SCAFFOLD_2053=GI_6_3	7729948	+	N	G	N	A	G	G	A	N	G	N	A	N	G	N	N	A	A	N	G	A	G	A	A	G	N	A	N	G	N	G	A	A	N	G	G	G	A	G	G	G	A
1863	1863	M1863	SCSC-11_GI_6_1=	T/A	3	CSC-11_GI_6_1=SCAFFOLD_1954=GI_6_2=SCAFFOLD_2053=GI_6_3	7729952	+	N	A	N	T	A	A	T	N	A	N	T	N	A	N	N	T	T	N	A	T	A	T	T	A	N	T	N	A	N	A	T	T	N	A	A	A	T	A	A	A	T
1864	1864	M1864	SCSC-11_GI_6_1=	G/C	3	CSC-11_GI_6_1=SCAFFOLD_1954=GI_6_2=SCAFFOLD_2053=GI_6_3	7730876	+	N	C	C	G	C	C	G	N	C	G	G	N	C	N	N	G	G	N	C	G	C	G	G	C	N	G	N	C	N	C	G	G	N	C	C	C	G	C	C	C	G
1865	1865	M1865	SCSC-11_GI_6_1=	C/T	3	CSC-11_GI_6_1=SCAFFOLD_1954=GI_6_2=SCAFFOLD_2053=GI_6_3	7731282	+	C	T	N	C	T	T	C	N	T	C	C	N	T	N	N	C	C	N	T	C	T	C	C	T	N	C	N	T	N	T	C	C	N	T	T	T	C	T	T	T	C
1866	1866	M1866	SCSC-11_GI_6_1=	C/T	3	CSC-11_GI_6_1=SCAFFOLD_1954=GI_6_2=SCAFFOLD_2053=GI_6_3	7731432	+	N	T	N	C	T	T	C	N	T	C	C	N	T	N	N	C	C	N	T	C	T	C	C	T	T	C	N	T	N	T	C	C	N	T	T	T	C	T	T	T	C
1867	1867	M1867	SCSC-11_GI_6_1=	A/C	3	CSC-11_GI_6_1=SCAFFOLD_1954=GI_6_2=SCAFFOLD_2053=GI_6_3	7731438	+	N	C	N	A	C	C	A	N	C	A	A	N	C	N	N	A	A	N	C	A	C	A	A	C	C	A	N	C	N	C	A	A	N	C	C	C	A	C	C	C	A
1868	1868	M1868	SCSC-11_GI_6_1=	T/C	3	CSC-11_GI_6_1=SCAFFOLD_1954=GI_6_2=SCAFFOLD_2053=GI_6_3	7731449	+	N	C	N	T	C	C	T	N	C	T	T	N	C	N	N	T	T	N	C	T	C	T	T	C	C	T	N	C	N	C	T	T	N	C	C	C	T	C	C	C	T
1871	1871	M1871	SCSC-11_GI_6_1=	A/C	3	CSC-11_GI_6_1=SCAFFOLD_1954=GI_6_2=SCAFFOLD_2053=GI_6_3	7752634	+	N	C	N	A	C	C	A	N	C	A	A	N	C	N	N	A	A	N	C	A	C	A	A	C	N	A	N	C	N	C	A	A	N	C	C	C	A	C	C	C	A
1872	1872	M1872	SCSC-11_GI_6_1=	A/G	3	CSC-11_GI_6_1=SCAFFOLD_1954=GI_6_2=SCAFFOLD_2053=GI_6_3	7752658	+	N	G	N	A	G	G	A	N	G	A	A	N	G	N	N	A	A	N	G	A	G	A	A	G	N	A	N	G	N	G	A	A	N	G	G	G	A	G	G	G	A
1873	1873	M1873	SCSC-11_GI_6_1=	C/T	3	CSC-11_GI_6_1=SCAFFOLD_1954=GI_6_2=SCAFFOLD_2053=GI_6_3	7752730	+	N	T	T	C	T	T	C	N	T	C	C	N	T	N	N	C	C	N	T	C	T	C	C	T	T	C	N	T	N	T	C	C	N	T	T	T	C	T	T	T	C
1874	1874	M1874	SCSC-11_GI_6_1=	C/T	3	CSC-11_GI_6_1=SCAFFOLD_1954=GI_6_2=SCAFFOLD_2053=GI_6_3	7752769	+	N	T	T	C	T	T	C	N	T	C	C	N	T	N	N	C	C	N	T	C	T	C	C	T	T	C	N	T	N	T	C	C	N	T	T	T	C	T	T	T	C
1875	1875	M1875	SCSC-11_GI_6_1=	T/C	3	CSC-11_GI_6_1=SCAFFOLD_1954=GI_6_2=SCAFFOLD_2053=GI_6_3	7764752	+	N	C	N	T	C	C	T	N	C	T	T	N	C	N	N	T	T	N	C	T	C	T	T	C	C	T	N	C	N	C	T	T	N	C	C	C	T	C	C	C	T
1876	1876	M1876	SCSC-11_GI_6_1=	G/C	3	CSC-11_GI_6_1=SCAFFOLD_1954=GI_6_2=SCAFFOLD_2053=GI_6_3	7768049	+	N	C	N	G	C	C	G	N	C	G	G	N	C	N	N	G	G	N	C	G	C	G	G	C	C	G	N	C	N	C	G	G	N	C	C	C	G	C	C	C	G
1877	1877	M1877	SCSC-11_GI_6_1=	G/A	3	CSC-11_GI_6_1=SCAFFOLD_1954=GI_6_2=SCAFFOLD_2053=GI_6_3	7768067	+	N	A	N	G	A	A	G	N	A	G	G	N	A	N	N	G	G	N	A	G	A	G	G	A	A	G	N	A	N	A	G	G	N	A	A	A	G	A	A	A	G
1878	1878	M1878	SCSC-11_GI_6_1=	C/T	3	CSC-11_GI_6_1=SCAFFOLD_1954=GI_6_2=SCAFFOLD_2053=GI_6_3	7768069	+	N	T	N	C	T	T	C	N	T	C	C	N	T	N	N	C	C	N	T	C	T	C	C	T	T	C	N	T	N	T	C	C	N	T	T	T	C	T	T	T	C
1879	1879	M1879	SCSC-11_GI_6_1=	A/G	3	CSC-11_GI_6_1=SCAFFOLD_1954=GI_6_2=SCAFFOLD_2053=GI_6_3	7786270	+	A	G	N	A	G	G	A	N	G	A	A	N	G	N	N	A	A	N	G	G	G	A	A	G	N	A	N	G	N	G	A	A	N	G	G	G	A	G	G	G	A
1880	1880	M1880	SCSC-11_GI_6_1=	A/G	3	CSC-11_GI_6_1=SCAFFOLD_1954=GI_6_2=SCAFFOLD_2053=GI_6_3	7786272	+	A	G	N	A	G	G	A	N	G	A	A	N	G	N	N	A	A	N	G	G	G	A	A	G	N	A	N	G	N	G	A	A	N	G	G	G	A	G	G	G	A
1881	1881	M1881	SCSC-11_GI_6_1=	T/C	3	CSC-11_GI_6_1=SCAFFOLD_1954=GI_6_2=SCAFFOLD_2053=GI_6_3	7786680	+	N	C	N	T	C	C	T	N	C	T	T	N	C	N	N	T	T	N	C	C	C	T	T	C	C	T	N	C	N	C	T	T	N	C	C	C	T	C	C	C	T
1882	1882	M1882	SCSC-11_GI_6_1=	G/T	3	CSC-11_GI_6_1=SCAFFOLD_1954=GI_6_2=SCAFFOLD_2053=GI_6_3	7787372	+	N	T	T	G	T	T	G	N	T	G	G	N	T	N	N	G	G	N	T	T	T	G	G	T	T	G	N	T	N	T	G	G	N	T	T	T	G	T	T	T	G
1883	1883	M1883	SCSC-11_GI_6_1=	G/A	3	CSC-11_GI_6_1=SCAFFOLD_1954=GI_6_2=SCAFFOLD_2053=GI_6_3	7787403	+	N	A	A	G	A	A	G	N	A	G	G	N	A	N	N	G	G	N	A	A	A	G	G	A	A	G	N	A	N	A	G	G	N	A	A	A	G	A	A	A	G
1885	1885	M1885	SCSC-11_GI_6_1=	C/A	3	CSC-11_GI_6_1=SCAFFOLD_1954=GI_6_2=SCAFFOLD_2053=GI_6_3	7814770	+	N	A	N	C	A	A	C	N	A	C	C	N	A	N	N	C	C	N	A	A	A	C	C	A	A	C	N	A	N	A	C	C	N	A	A	A	C	A	A	A	C
1886	1886	M1886	SCSC-11_GI_6_1=	A/G	3	CSC-11_GI_6_1=SCAFFOLD_1954=GI_6_2=SCAFFOLD_2053=GI_6_3	7847728	+	N	G	N	A	G	G	A	N	G	A	A	N	G	N	N	A	A	N	G	G	G	A	A	G	G	A	N	G	N	G	A	A	N	G	G	G	A	G	G	G	A
1888	1888	M1888	SCSC-11_GI_6_1=	C/T	3	CSC-11_GI_6_1=SCAFFOLD_1954=GI_6_2=SCAFFOLD_2053=GI_6_3	7873894	+	C	T	N	C	T	T	C	N	T	C	C	N	T	N	N	C	C	N	T	T	T	C	C	T	N	C	N	T	N	T	C	C	N	T	T	T	C	T	T	T	C
1890	1890	M1890	SCSC-11_GI_6_1=	C/T	3	CSC-11_GI_6_1=SCAFFOLD_1954=GI_6_2=SCAFFOLD_2053=GI_6_3	8002484	+	N	T	N	C	T	T	C	N	T	C	C	N	T	N	N	C	C	N	T	T	T	C	C	T	N	C	N	T	N	T	C	C	N	T	T	T	C	T	T	T	C
1891	1891	M1891	SCSC-11_GI_6_1=	C/A	3	CSC-11_GI_6_1=SCAFFOLD_1954=GI_6_2=SCAFFOLD_2053=GI_6_3	8002508	+	N	A	N	C	A	A	C	N	A	C	C	N	A	N	N	C	C	N	A	A	A	C	C	A	N	C	N	A	N	A	C	C	N	A	A	A	C	A	A	A	C
1892	1892	M1892	SCSC-11_GI_6_1=	G/A	3	CSC-11_GI_6_1=SCAFFOLD_1954=GI_6_2=SCAFFOLD_2053=GI_6_3	8038882	+	N	A	N	G	A	A	G	N	A	G	G	N	A	N	N	G	G	N	A	A	A	G	G	A	N	G	N	A	N	A	G	G	N	A	A	A	G	A	A	A	G
1893	1893	M1893	SCSC-11_GI_6_1=	A/G	3	CSC-11_GI_6_1=SCAFFOLD_1954=GI_6_2=SCAFFOLD_2053=GI_6_3	8044770	+	N	G	N	A	G	G	A	N	G	A	A	N	G	N	N	A	A	N	G	G	G	A	A	G	G	A	N	G	N	G	A	A	N	G	G	G	A	G	G	G	A
1894	1894	M1894	SCSC-11_GI_6_1=	G/A	3	CSC-11_GI_6_1=SCAFFOLD_1954=GI_6_2=SCAFFOLD_2053=GI_6_3	8044784	+	N	A	N	G	A	A	G	N	A	G	G	N	A	N	N	G	G	N	A	A	A	G	G	A	A	G	N	A	N	A	G	G	N	A	A	A	G	A	A	A	G
1895	1895	M1895	SCSC-11_GI_6_1=	G/A	3	CSC-11_GI_6_1=SCAFFOLD_1954=GI_6_2=SCAFFOLD_2053=GI_6_3	8069850	+	N	A	N	G	A	A	G	N	A	G	G	N	A	N	N	G	G	N	A	A	A	G	G	A	N	G	N	A	N	A	G	G	N	A	A	A	G	A	A	A	G
1896	1896	M1896	SCSC-11_GI_6_1=	T/C	3	CSC-11_GI_6_1=SCAFFOLD_1954=GI_6_2=SCAFFOLD_2053=GI_6_3	8139600	+	N	C	N	T	C	C	T	N	C	T	T	N	C	N	N	T	T	N	C	C	C	T	T	C	N	T	N	C	N	C	T	T	N	C	C	C	T	C	C	C	T
1897	1897	M1897	SCSC-11_GI_6_1=	G/A	3	CSC-11_GI_6_1=SCAFFOLD_1954=GI_6_2=SCAFFOLD_2053=GI_6_3	8195038	+	G	A	N	G	A	A	G	N	A	G	G	N	A	N	N	G	G	N	R	A	A	G	G	A	A	G	N	A	N	A	G	G	N	A	A	A	G	A	A	A	G
1898	1898	M1898	SCSC-11_GI_6_1=	C/T	3	CSC-11_GI_6_1=SCAFFOLD_1954=GI_6_2=SCAFFOLD_2053=GI_6_3	8195246	+	N	T	N	C	T	T	C	N	T	C	C	N	T	N	N	C	C	N	Y	T	T	C	C	T	N	C	N	T	N	T	C	C	N	T	T	T	C	T	T	T	C
1899	1899	M1899	SCSC-11_GI_6_1=	C/T	3	CSC-11_GI_6_1=SCAFFOLD_1954=GI_6_2=SCAFFOLD_2053=GI_6_3	8195257	+	N	T	N	C	T	T	C	N	T	C	C	N	T	N	N	C	C	N	Y	T	T	C	C	T	N	C	N	T	N	T	C	C	N	T	T	T	C	T	T	T	C
1900	1900	M1900	SCSC-11_GI_6_1=	T/C	3	CSC-11_GI_6_1=SCAFFOLD_1954=GI_6_2=SCAFFOLD_2053=GI_6_3	8195287	+	N	C	N	T	C	C	T	N	C	T	T	N	C	N	N	T	T	N	Y	C	C	T	T	C	N	T	N	C	N	C	T	T	N	C	C	C	T	C	C	C	T
1901	1901	M1901	SCSC-11_GI_6_1=	A/G	3	CSC-11_GI_6_1=SCAFFOLD_1954=GI_6_2=SCAFFOLD_2053=GI_6_3	8197384	+	G	G	N	A	G	G	A	N	G	A	A	N	G	N	N	A	A	N	R	G	G	A	A	G	N	A	N	G	N	G	A	A	N	G	G	G	A	G	G	G	A
1902	1902	M1902	SCSC-11_GI_6_1=	C/T	3	CSC-11_GI_6_1=SCAFFOLD_1954=GI_6_2=SCAFFOLD_2053=GI_6_3	8203728	+	N	T	N	C	T	T	C	N	T	C	C	N	T	N	N	C	C	N	Y	T	T	C	C	T	N	C	N	T	N	T	C	C	N	T	T	T	C	T	T	T	C
1903	1903	M1903	SCSC-11_GI_6_1=	A/C	3	CSC-11_GI_6_1=SCAFFOLD_1954=GI_6_2=SCAFFOLD_2053=GI_6_3	8220240	+	N	C	N	A	C	C	A	N	C	N	A	N	C	N	N	A	A	N	M	C	C	A	A	C	N	A	N	C	N	C	A	A	N	C	C	C	A	C	C	C	A
1904	1904	M1904	SCSC-11_GI_6_1=	T/A	3	CSC-11_GI_6_1=SCAFFOLD_1954=GI_6_2=SCAFFOLD_2053=GI_6_3	8220316	+	N	A	N	T	A	A	T	N	A	T	T	N	A	N	N	T	T	N	W	A	A	T	T	A	A	T	N	A	N	A	T	T	N	A	A	A	T	A	A	A	T
1905	1905	M1905	SCSC-11_GI_6_1=	C/T	3	CSC-11_GI_6_1=SCAFFOLD_1954=GI_6_2=SCAFFOLD_2053=GI_6_3	8220351	+	N	T	N	C	T	T	C	N	T	C	C	N	T	N	N	C	C	N	Y	T	T	C	C	T	T	C	N	T	N	T	C	C	N	T	T	T	C	T	T	T	C
1906	1906	M1906	SCSC-11_GI_6_1=	C/T	3	CSC-11_GI_6_1=SCAFFOLD_1954=GI_6_2=SCAFFOLD_2053=GI_6_3	8222524	+	N	T	N	C	T	T	C	N	T	C	C	N	T	N	N	C	N	N	Y	T	T	C	C	T	T	C	N	T	N	T	C	C	N	T	T	T	C	T	T	T	C
1907	1907	M1907	SCSC-11_GI_6_1=	C/T	3	CSC-11_GI_6_1=SCAFFOLD_1954=GI_6_2=SCAFFOLD_2053=GI_6_3	8222818	+	N	T	N	C	T	T	C	N	T	C	C	N	T	N	N	C	C	N	Y	T	T	C	C	T	T	C	N	T	N	T	C	C	N	T	T	T	C	T	T	T	C
1908	1908	M1908	SCSC-11_GI_6_1=	C/G	3	CSC-11_GI_6_1=SCAFFOLD_1954=GI_6_2=SCAFFOLD_2053=GI_6_3	8222875	+	N	G	N	C	G	G	C	N	G	C	C	N	G	N	N	C	C	N	S	G	G	C	C	G	G	C	N	G	N	G	C	C	N	G	G	G	C	G	G	G	C
1910	1910	M1910	SCSC-11_GI_6_1=	A/G	3	CSC-11_GI_6_1=SCAFFOLD_1954=GI_6_2=SCAFFOLD_2053=GI_6_3	8267337	+	N	G	G	A	G	G	A	N	G	A	A	N	G	N	N	A	A	N	G	G	G	A	A	G	G	A	N	G	N	G	A	A	N	G	G	G	G	G	G	G	A
1911	1911	M1911	SCSC-11_GI_6_1=	T/A	3	CSC-11_GI_6_1=SCAFFOLD_1954=GI_6_2=SCAFFOLD_2053=GI_6_3	8293057	+	N	A	N	T	A	A	T	N	A	T	T	N	A	N	N	T	T	N	W	A	A	T	T	A	N	T	N	A	N	A	T	T	N	A	A	A	A	A	A	A	T
1912	1912	M1912	SCSC-11_GI_6_1=	C/G	3	CSC-11_GI_6_1=SCAFFOLD_1954=GI_6_2=SCAFFOLD_2053=GI_6_3	8294711	+	N	G	N	C	G	G	C	N	G	N	C	N	G	N	N	C	C	N	S	G	G	C	C	G	N	C	N	G	N	G	C	C	N	G	G	G	G	G	G	G	C
1913	1913	M1913	SCSC-11_GI_6_1=	A/T	3	CSC-11_GI_6_1=SCAFFOLD_1954=GI_6_2=SCAFFOLD_2053=GI_6_3	8351785	+	N	T	N	A	T	W	A	N	T	A	A	N	T	N	N	A	A	N	W	T	T	A	A	T	N	A	N	T	N	T	A	A	N	T	T	T	T	T	T	T	A
1914	1914	M1914	SCSC-11_GI_6_1=	A/C	3	CSC-11_GI_6_1=SCAFFOLD_1954=GI_6_2=SCAFFOLD_2053=GI_6_3	8404811	+	N	C	N	A	C	C	A	N	C	A	A	N	C	N	N	A	A	N	M	C	C	C	A	C	N	A	N	C	N	C	A	A	N	C	C	C	C	C	C	C	C
1915	1915	M1915	SCSC-11_GI_6_1=	C/T	3	CSC-11_GI_6_1=SCAFFOLD_1954=GI_6_2=SCAFFOLD_2053=GI_6_3	8404826	+	N	T	N	C	T	T	C	N	T	C	C	N	T	N	N	C	C	N	Y	T	T	T	C	T	N	C	N	T	N	T	C	C	N	T	T	T	T	T	T	T	T
1916	1916	M1916	SCSC-11_GI_6_1=	G/A	3	CSC-11_GI_6_1=SCAFFOLD_1954=GI_6_2=SCAFFOLD_2053=GI_6_3	8411471	+	N	A	N	G	A	A	G	N	A	G	G	N	A	N	N	G	G	N	R	A	A	A	G	A	A	G	N	A	N	A	G	G	N	A	A	A	A	A	A	A	A
1917	1917	M1917	SCSC-11_GI_6_1=	C/T	3	CSC-11_GI_6_1=SCAFFOLD_1954=GI_6_2=SCAFFOLD_2053=GI_6_3	8411564	+	N	T	N	C	T	T	C	N	T	C	C	N	T	N	N	C	C	N	Y	T	T	T	C	T	N	C	N	T	N	T	C	C	N	T	T	T	T	T	T	T	T
1918	1918	M1918	SCSC-11_GI_6_1=	G/A	3	CSC-11_GI_6_1=SCAFFOLD_1954=GI_6_2=SCAFFOLD_2053=GI_6_3	8436431	+	N	A	N	G	A	A	G	N	A	G	G	N	A	N	N	G	G	N	R	A	A	A	G	A	A	G	N	A	N	A	G	G	N	A	A	A	A	A	A	A	A
1919	1919	M1919	SCSC-11_GI_6_1=	A/G	3	CSC-11_GI_6_1=SCAFFOLD_1954=GI_6_2=SCAFFOLD_2053=GI_6_3	8436440	+	N	G	N	A	G	G	A	N	G	A	A	N	G	N	N	A	A	N	R	G	G	G	A	G	G	A	N	G	N	G	A	A	N	G	G	G	G	G	G	G	G
1920	1920	M1920	SCSC-11_GI_6_1=	G/T	3	CSC-11_GI_6_1=SCAFFOLD_1954=GI_6_2=SCAFFOLD_2053=GI_6_3	8448809	+	N	T	N	G	T	T	G	N	T	G	G	N	T	N	N	G	G	N	K	T	T	T	G	T	N	G	N	T	N	T	G	G	N	T	T	T	T	T	T	T	T
1921	1921	M1921	SCSC-11_GI_6_1=	A/G	3	CSC-11_GI_6_1=SCAFFOLD_1954=GI_6_2=SCAFFOLD_2053=GI_6_3	8448836	+	N	G	N	A	G	G	A	N	G	A	A	N	G	N	N	A	A	N	R	G	G	G	A	G	N	A	N	G	N	G	A	A	N	G	G	G	G	G	G	G	G
1922	1922	M1922	SCSC-11_GI_6_1=	C/A	3	CSC-11_GI_6_1=SCAFFOLD_1954=GI_6_2=SCAFFOLD_2053=GI_6_3	8448848	+	N	A	N	C	A	A	C	N	A	C	C	N	A	N	N	C	C	N	M	A	A	A	C	A	N	C	N	A	N	A	C	C	N	A	A	A	A	A	A	A	A
1923	1923	M1923	SCSC-11_GI_6_1=	G/A	3	CSC-11_GI_6_1=SCAFFOLD_1954=GI_6_2=SCAFFOLD_2053=GI_6_3	8448860	+	N	A	N	G	A	A	G	N	A	G	G	N	A	N	N	G	G	N	R	A	A	A	G	A	N	G	N	A	N	A	G	G	N	A	A	A	A	A	A	A	A
1924	1924	M1924	SCSC-11_GI_6_1=	G/A	3	CSC-11_GI_6_1=SCAFFOLD_1954=GI_6_2=SCAFFOLD_2053=GI_6_3	8766649	+	N	A	N	G	A	A	G	N	A	G	A	N	A	N	N	G	A	N	R	A	A	A	G	A	A	G	N	A	N	A	G	G	N	A	A	A	A	G	G	A	A
1925	1925	M1925	SCSC-11_GI_6_1=	G/T	3	CSC-11_GI_6_1=SCAFFOLD_1954=GI_6_2=SCAFFOLD_2053=GI_6_3	8766669	+	N	T	N	G	T	T	G	N	T	G	T	N	T	N	N	G	T	N	K	T	T	T	G	T	T	G	N	T	N	T	G	G	N	T	T	T	T	G	G	T	T
1926	1926	M1926	SCSC-11_GI_6_1=	T/C	3	CSC-11_GI_6_1=SCAFFOLD_1954=GI_6_2=SCAFFOLD_2053=GI_6_3	8766686	+	N	C	N	T	C	C	T	N	C	T	C	N	C	N	N	T	C	N	Y	C	C	C	T	C	C	T	N	C	N	C	T	T	N	C	C	C	C	T	T	C	C
1927	1927	M1927	SCSC-11_GI_6_1=	G/A	3	CSC-11_GI_6_1=SCAFFOLD_1954=GI_6_2=SCAFFOLD_2053=GI_6_3	8766741	+	N	A	N	G	A	A	G	N	A	G	A	N	A	N	N	G	A	N	R	A	A	A	G	A	A	G	N	A	N	A	G	G	N	A	A	A	A	G	G	A	A
1928	1928	M1928	SCSC-11_GI_6_1=	G/A	3	CSC-11_GI_6_1=SCAFFOLD_1954=GI_6_2=SCAFFOLD_2053=GI_6_3	8766743	+	N	A	N	G	A	A	G	N	A	G	A	N	A	N	N	G	A	N	R	A	A	A	G	A	A	G	N	A	N	A	G	G	N	A	A	A	A	G	G	A	A
1929	1929	M1929	SCSC-11_GI_6_1=	G/T	3	CSC-11_GI_6_1=SCAFFOLD_1954=GI_6_2=SCAFFOLD_2053=GI_6_3	8766746	+	N	T	N	G	T	T	G	N	T	G	T	N	T	N	N	G	T	N	K	T	T	T	G	T	T	G	N	T	N	T	G	G	N	T	T	T	T	G	G	T	T
1930	1930	M1930	SCSC-11_GI_6_1=	A/C	3	CSC-11_GI_6_1=SCAFFOLD_1954=GI_6_2=SCAFFOLD_2053=GI_6_3	8766794	+	N	C	N	A	C	C	A	N	C	A	C	N	C	N	N	A	C	N	M	C	C	C	A	C	C	A	N	C	N	C	A	A	N	C	C	C	C	A	A	C	C
1934	1934	M1934	SCSC-11_GI_6_1=	G/A	3	CSC-11_GI_6_1=SCAFFOLD_1954=GI_6_2=SCAFFOLD_2053=GI_6_3	8791652	+	G	A	N	G	A	A	G	N	A	G	A	N	A	N	N	G	A	N	R	A	A	A	G	A	A	G	N	A	N	A	G	G	N	A	A	A	A	G	G	A	A
1935	1935	M1935	SCSC-11_GI_6_1=	A/G	3	CSC-11_GI_6_1=SCAFFOLD_1954=GI_6_2=SCAFFOLD_2053=GI_6_3	8791658	+	A	G	N	A	G	G	A	N	G	A	G	N	G	N	N	A	G	N	R	G	G	G	A	G	G	A	N	G	N	G	A	A	N	G	G	G	G	A	A	G	G
1936	1936	M1936	SCSC-11_GI_6_1=	C/T	3	CSC-11_GI_6_1=SCAFFOLD_1954=GI_6_2=SCAFFOLD_2053=GI_6_3	8800330	+	N	T	N	C	T	T	C	N	T	C	T	N	T	N	N	C	T	N	Y	T	T	T	C	T	N	C	N	T	N	T	C	C	N	T	T	T	T	C	C	T	T
1937	1937	M1937	SCSC-11_GI_6_1=	C/T	3	CSC-11_GI_6_1=SCAFFOLD_1954=GI_6_2=SCAFFOLD_2053=GI_6_3	8800355	+	N	T	N	C	T	T	C	N	T	C	T	N	T	N	N	C	T	N	Y	T	T	T	C	T	N	C	N	T	N	T	C	C	N	T	T	T	T	C	C	T	T
1940	1940	M1940	SCSC-11_GI_6_1=	T/A	3	CSC-11_GI_6_1=SCAFFOLD_1954=GI_6_2=SCAFFOLD_2053=GI_6_3	8800611	+	N	A	A	T	A	A	T	N	A	T	A	N	A	N	N	T	A	N	W	A	A	A	T	A	A	T	N	A	N	A	T	T	N	A	A	A	A	T	T	A	A
1941	1941	M1941	SCSC-11_GI_6_1=	C/T	3	CSC-11_GI_6_1=SCAFFOLD_1954=GI_6_2=SCAFFOLD_2053=GI_6_3	8800645	+	N	T	N	C	T	T	C	N	T	C	T	N	T	N	N	C	N	N	Y	T	T	T	C	T	T	C	N	T	N	T	C	C	N	T	T	T	T	C	C	T	T
1942	1942	M1942	SCSC-11_GI_6_1=	G/A	3	CSC-11_GI_6_1=SCAFFOLD_1954=GI_6_2=SCAFFOLD_2053=GI_6_3	8800665	+	N	A	N	G	A	A	G	N	A	G	A	N	A	N	N	G	N	N	R	A	A	A	G	A	A	G	N	A	N	A	G	G	N	A	A	A	A	G	G	A	A
1943	1943	M1943	SCSC-11_GI_6_1=	A/G	3	CSC-11_GI_6_1=SCAFFOLD_1954=GI_6_2=SCAFFOLD_2053=GI_6_3	8800668	+	N	G	N	A	G	G	A	N	G	A	G	N	G	N	N	A	N	N	R	G	G	G	A	G	G	A	N	G	N	G	A	A	N	G	G	G	G	A	A	G	G
1944	1944	M1944	SCSC-11_GI_6_1=	A/T	3	CSC-11_GI_6_1=SCAFFOLD_1954=GI_6_2=SCAFFOLD_2053=GI_6_3	8800685	+	N	T	N	A	T	T	A	N	T	A	T	N	T	N	N	A	N	N	W	T	T	T	A	T	T	A	N	T	N	T	A	A	N	T	T	T	T	A	A	T	T
1945	1945	M1945	SCSC-11_GI_6_1=	G/C	3	CSC-11_GI_6_1=SCAFFOLD_1954=GI_6_2=SCAFFOLD_2053=GI_6_3	8801378	+	N	C	N	G	C	C	G	N	C	G	C	N	C	N	N	G	C	N	S	C	C	C	G	C	C	G	N	C	N	C	G	G	N	C	C	C	C	G	G	C	C
1946	1946	M1946	SCSC-11_GI_6_1=	A/G	3	CSC-11_GI_6_1=SCAFFOLD_1954=GI_6_2=SCAFFOLD_2053=GI_6_3	8801423	+	N	G	N	A	G	G	A	N	G	A	G	N	G	N	N	A	G	N	R	G	G	G	A	G	G	A	N	G	N	G	A	A	N	G	G	G	G	A	A	G	G
1947	1947	M1947	SCSC-11_GI_6_1=	A/C	3	CSC-11_GI_6_1=SCAFFOLD_1954=GI_6_2=SCAFFOLD_2053=GI_6_3	8815709	+	N	C	N	A	C	C	A	N	C	A	C	N	C	N	N	A	C	N	M	C	C	C	A	C	N	A	N	C	N	C	A	A	N	C	C	C	C	A	A	C	C
1948	1948	M1948	SCSC-11_GI_6_1=	T/C	3	CSC-11_GI_6_1=SCAFFOLD_1954=GI_6_2=SCAFFOLD_2053=GI_6_3	8823598	+	N	C	N	T	C	C	T	N	C	T	C	N	C	N	N	T	C	N	Y	C	C	C	T	C	N	T	N	C	N	C	T	T	N	C	C	C	C	T	T	C	C
2335	2335	M2335	SCSC-121_SCAFFO	C/G	3	CSC-121_SCAFFOLD_417=SCAFFOLD_816	121473	+	N	G	N	G	C	G	G	N	C	G	C	N	S	N	N	C	C	N	G	G	G	G	C	C	N	C	N	C	N	C	C	G	N	G	C	C	G	C	C	G	G
2336	2336	M2336	SCSC-1_GI_9_1=S	C/A	3	CSC-1_GI_9_1=SCAFFOLD_1977=GI_9_2	46866	+	N	A	N	C	C	C	C	N	A	C	A	N	C	N	N	A	N	N	C	C	C	C	A	A	C	C	N	A	N	A	A	C	N	C	C	C	A	C	C	C	A
2337	2337	M2337	SCSC-1_GI_9_1=S	A/G	3	CSC-1_GI_9_1=SCAFFOLD_1977=GI_9_2	63159	+	N	G	N	A	A	A	A	N	G	A	G	N	A	N	N	G	G	N	A	A	A	A	G	G	N	A	N	G	N	G	G	A	N	A	A	A	G	A	A	A	G
2338	2338	M2338	SCSC-1_GI_9_1=S	A/G	3	CSC-1_GI_9_1=SCAFFOLD_1977=GI_9_2	63165	+	N	G	N	A	A	A	A	N	G	A	G	N	A	N	N	G	G	N	A	A	A	A	G	G	N	A	N	G	N	G	G	A	N	A	A	A	G	A	A	A	G
2339	2339	M2339	SCSC-1_GI_9_1=S	C/T	3	CSC-1_GI_9_1=SCAFFOLD_1977=GI_9_2	117775	+	N	C	N	T	T	T	T	N	C	T	C	N	T	N	N	C	C	N	T	T	T	T	C	T	N	T	N	C	N	C	C	T	N	T	T	T	C	Y	T	T	C
2340	2340	M2340	SCSC-1_GI_9_1=S	A/T	3	CSC-1_GI_9_1=SCAFFOLD_1977=GI_9_2	164832	+	N	A	N	T	T	T	T	N	A	T	A	N	T	N	N	A	A	N	T	T	T	T	A	T	T	T	N	A	N	A	A	A	N	T	T	T	A	T	T	W	A
2341	2341	M2341	SCSC-1_GI_9_1=S	A/G	3	CSC-1_GI_9_1=SCAFFOLD_1977=GI_9_2	170704	+	A	A	N	G	G	G	G	N	A	N	A	N	G	N	N	A	A	N	G	G	G	G	A	G	N	G	N	A	N	A	A	A	N	N	G	G	A	G	G	R	A
2345	2345	M2345	SCSC-1_GI_9_1=S	G/A	3	CSC-1_GI_9_1=SCAFFOLD_1977=GI_9_2	227698	+	N	A	N	G	G	G	G	N	A	G	A	N	G	N	N	A	A	N	G	G	G	G	A	G	G	G	N	A	N	A	A	A	N	G	G	G	A	G	G	R	A
2346	2346	M2346	SCSC-1_GI_9_1=S	A/T	3	CSC-1_GI_9_1=SCAFFOLD_1977=GI_9_2	227710	+	N	T	N	A	A	A	A	N	T	A	T	N	A	N	N	T	T	N	A	A	A	A	T	A	A	A	N	T	N	T	T	T	N	A	A	A	T	A	A	W	T
2347	2347	M2347	SCSC-1_GI_9_1=S	A/C	3	CSC-1_GI_9_1=SCAFFOLD_1977=GI_9_2	227721	+	N	C	N	A	A	A	A	N	C	A	C	N	A	N	N	C	C	N	A	A	A	A	C	A	A	A	N	C	N	C	C	C	N	A	A	A	C	A	A	M	C
2348	2348	M2348	SCSC-1_GI_9_1=S	A/G	3	CSC-1_GI_9_1=SCAFFOLD_1977=GI_9_2	227741	+	N	G	N	A	A	A	A	N	G	A	G	N	A	N	N	G	G	N	A	A	A	A	G	A	A	A	N	G	N	G	G	G	N	A	A	A	G	A	A	R	G
2349	2349	M2349	SCSC-1_GI_9_1=S	A/G	3	CSC-1_GI_9_1=SCAFFOLD_1977=GI_9_2	228361	+	N	A	N	G	G	G	G	N	A	G	A	N	G	N	N	A	A	N	G	G	G	G	A	G	N	G	N	A	N	A	A	A	N	G	G	G	A	G	G	R	A
2350	2350	M2350	SCSC-1_GI_9_1=S	G/C	3	CSC-1_GI_9_1=SCAFFOLD_1977=GI_9_2	250173	+	G	G	N	C	C	C	C	N	G	C	G	N	C	N	N	G	G	N	C	C	C	C	G	C	N	C	N	G	N	G	G	G	N	C	C	C	G	C	C	S	G
2351	2351	M2351	SCSC-1_GI_9_1=S	G/C	3	CSC-1_GI_9_1=SCAFFOLD_1977=GI_9_2	250189	+	G	G	N	C	C	C	C	N	G	C	G	N	C	N	N	G	G	N	C	C	C	C	G	C	N	C	N	G	N	G	G	G	N	C	C	C	G	C	C	S	G
2352	2352	M2352	SCSC-1_GI_9_1=S	A/T	3	CSC-1_GI_9_1=SCAFFOLD_1977=GI_9_2	250198	+	A	A	N	T	T	T	T	N	A	T	A	N	T	N	N	A	A	N	T	T	T	T	A	T	N	T	N	A	N	A	A	A	N	T	T	T	A	T	T	W	A
2353	2353	M2353	SCSC-1_GI_9_1=S	A/G	3	CSC-1_GI_9_1=SCAFFOLD_1977=GI_9_2	250281	+	N	G	N	A	A	A	A	N	G	N	G	N	A	N	N	G	G	N	A	A	A	A	G	A	A	A	N	G	N	G	G	G	N	A	A	A	G	A	A	R	G
2354	2354	M2354	SCSC-1_GI_9_1=S	G/C	3	CSC-1_GI_9_1=SCAFFOLD_1977=GI_9_2	260659	+	N	C	G	G	G	G	G	N	C	G	C	N	G	N	N	C	C	N	G	G	G	G	C	G	N	G	N	C	N	C	C	C	N	G	G	G	C	G	G	S	C
2355	2355	M2355	SCSC-1_GI_9_1=S	C/T	3	CSC-1_GI_9_1=SCAFFOLD_1977=GI_9_2	260723	+	N	T	N	C	C	C	C	N	T	C	T	N	C	N	N	T	T	N	C	C	C	C	T	C	C	C	N	T	N	T	T	T	N	C	C	C	T	C	C	Y	T
2356	2356	M2356	SCSC-1_GI_9_1=S	T/C	3	CSC-1_GI_9_1=SCAFFOLD_1977=GI_9_2	260725	+	N	C	N	T	T	T	T	N	C	T	C	N	T	N	N	C	C	N	T	T	T	T	C	T	T	T	N	C	N	C	C	C	N	T	T	T	C	T	T	Y	C
2357	2357	M2357	SCSC-1_GI_9_1=S	C/T	3	CSC-1_GI_9_1=SCAFFOLD_1977=GI_9_2	274506	+	N	T	N	C	C	C	C	N	T	C	T	N	C	N	N	T	T	N	C	C	C	C	T	C	N	C	N	T	N	T	T	T	N	C	C	C	T	C	C	Y	T
2358	2358	M2358	SCSC-1_GI_9_1=S	G/A	3	CSC-1_GI_9_1=SCAFFOLD_1977=GI_9_2	274550	+	N	A	N	G	G	G	G	N	A	G	A	N	G	N	N	A	A	N	G	G	G	G	A	G	N	G	N	A	N	A	A	A	N	G	G	G	A	G	G	R	A
2359	2359	M2359	SCSC-1_GI_9_1=S	A/G	3	CSC-1_GI_9_1=SCAFFOLD_1977=GI_9_2	274570	+	N	G	N	A	A	A	A	N	G	A	G	N	A	N	N	G	G	N	A	A	A	A	G	A	N	A	N	G	N	G	G	G	N	A	A	A	G	A	A	R	G
2360	2360	M2360	SCSC-1_GI_9_1=S	G/A	3	CSC-1_GI_9_1=SCAFFOLD_1977=GI_9_2	274591	+	N	A	N	G	G	G	G	N	A	G	A	N	G	N	N	A	A	N	G	G	G	G	A	G	N	G	N	A	N	A	A	A	N	G	G	G	A	G	G	R	A
2361	2361	M2361	SCSC-1_GI_9_1=S	C/T	3	CSC-1_GI_9_1=SCAFFOLD_1977=GI_9_2	283294	+	N	C	N	T	T	N	T	N	C	N	C	N	N	N	N	C	C	N	T	T	T	T	C	T	T	T	N	C	N	C	C	C	N	T	T	T	C	T	T	C	C
2362	2362	M2362	SCSC-1_GI_9_1=S	T/C	3	CSC-1_GI_9_1=SCAFFOLD_1977=GI_9_2	316061	+	N	C	N	T	T	T	T	N	C	T	C	N	T	N	N	C	C	N	T	T	T	T	C	T	N	T	N	C	N	C	C	C	N	T	T	T	C	T	T	Y	C
2363	2363	M2363	SCSC-1_GI_9_1=S	T/C	3	CSC-1_GI_9_1=SCAFFOLD_1977=GI_9_2	316078	+	N	C	N	T	T	T	T	N	C	T	C	N	T	N	N	C	C	N	T	T	T	T	C	T	N	T	N	C	N	C	C	C	N	T	T	T	C	T	T	Y	C
2364	2364	M2364	SCSC-1_GI_9_1=S	G/T	3	CSC-1_GI_9_1=SCAFFOLD_1977=GI_9_2	338095	+	N	T	N	G	G	G	G	N	T	G	T	N	G	N	N	T	T	N	G	G	G	G	T	G	G	G	N	T	N	T	T	T	N	G	T	G	T	G	G	K	T
2365	2365	M2365	SCSC-1_GI_9_1=S	T/C	3	CSC-1_GI_9_1=SCAFFOLD_1977=GI_9_2	403670	+	N	C	N	T	T	T	T	N	C	T	C	N	T	N	N	C	C	N	T	T	T	T	C	T	T	T	N	C	N	C	C	C	N	T	C	T	C	T	T	T	C
2366	2366	M2366	SCSC-1_GI_9_1=S	A/G	3	CSC-1_GI_9_1=SCAFFOLD_1977=GI_9_2	492189	+	N	G	N	A	A	N	A	N	G	A	G	N	A	N	N	G	G	N	A	A	A	A	G	A	A	A	N	G	N	G	G	G	N	A	G	G	G	A	A	A	G
2367	2367	M2367	SCSC-1_GI_9_1=S	G/A	3	CSC-1_GI_9_1=SCAFFOLD_1977=GI_9_2	492222	+	N	A	N	G	G	N	G	N	A	G	A	N	G	N	N	A	A	N	G	G	G	G	A	G	G	G	N	A	N	A	A	A	N	G	A	A	A	G	G	G	A
2370	2370	M2370	SCSC-1_GI_9_1=S	T/C	3	CSC-1_GI_9_1=SCAFFOLD_1977=GI_9_2	508856	+	N	C	N	T	T	T	T	N	C	T	C	N	T	N	N	C	C	N	T	T	T	T	C	T	T	T	N	C	N	C	C	C	N	T	C	C	C	T	T	T	C
2371	2371	M2371	SCSC-1_GI_9_1=S	A/G	3	CSC-1_GI_9_1=SCAFFOLD_1977=GI_9_2	508899	+	N	G	N	A	A	A	A	N	G	A	G	N	A	N	N	G	G	N	A	A	A	A	G	A	N	A	N	G	N	G	G	G	N	A	G	G	G	A	A	A	G
2372	2372	M2372	SCSC-1_GI_9_1=S	A/T	3	CSC-1_GI_9_1=SCAFFOLD_1977=GI_9_2	508913	+	N	T	N	A	A	A	A	N	T	A	T	N	A	N	N	T	T	N	A	A	A	A	T	A	N	A	N	T	N	T	T	T	N	A	T	T	T	A	A	A	T
2373	2373	M2373	SCSC-1_GI_9_1=S	C/A	3	CSC-1_GI_9_1=SCAFFOLD_1977=GI_9_2	561851	+	N	A	N	C	C	C	C	N	A	C	A	N	C	N	N	A	A	N	C	C	C	C	A	C	N	C	N	A	N	A	A	A	N	C	A	A	A	C	C	M	A
2374	2374	M2374	SCSC-1_GI_9_1=S	G/A	3	CSC-1_GI_9_1=SCAFFOLD_1977=GI_9_2	599427	+	A	A	N	G	G	G	G	N	A	G	A	N	G	N	N	A	A	N	G	G	G	G	A	G	G	G	N	A	N	A	A	A	N	G	A	A	A	G	G	R	A
2375	2375	M2375	SCSC-1_GI_9_1=S	T/A	3	CSC-1_GI_9_1=SCAFFOLD_1977=GI_9_2	599428	+	A	A	N	T	T	T	T	N	A	T	A	N	T	N	N	A	A	N	T	T	T	T	A	T	T	T	N	A	N	A	A	A	N	T	A	A	A	T	T	W	A
2376	2376	M2376	SCSC-1_GI_9_1=S	A/G	3	CSC-1_GI_9_1=SCAFFOLD_1977=GI_9_2	599439	+	G	G	N	A	A	A	A	N	G	A	G	N	A	N	N	G	G	N	A	A	A	A	G	A	A	A	N	G	N	G	G	G	N	A	G	G	G	A	A	R	G
2377	2377	M2377	SCSC-1_GI_9_1=S	T/A	3	CSC-1_GI_9_1=SCAFFOLD_1977=GI_9_2	601101	+	N	A	N	T	T	T	T	N	A	T	A	N	T	N	N	A	A	N	T	T	T	T	A	T	T	T	N	A	N	A	A	A	N	T	A	A	A	T	T	W	A
2378	2378	M2378	SCSC-1_GI_9_1=S	A/G	3	CSC-1_GI_9_1=SCAFFOLD_1977=GI_9_2	601104	+	N	G	N	A	A	A	A	N	G	A	G	N	A	N	N	G	G	N	A	A	A	A	G	A	A	A	N	G	N	G	G	G	N	A	G	G	G	A	A	R	G
2379	2379	M2379	SCSC-1_GI_9_1=S	C/A	3	CSC-1_GI_9_1=SCAFFOLD_1977=GI_9_2	601203	+	N	A	N	C	C	C	C	N	A	C	A	N	C	N	N	A	A	N	C	C	C	C	A	C	C	C	N	A	N	A	A	A	N	C	A	A	A	C	C	M	A
2380	2380	M2380	SCSC-1_GI_9_1=S	C/A	3	CSC-1_GI_9_1=SCAFFOLD_1977=GI_9_2	601254	+	N	A	N	C	C	C	C	N	A	C	A	N	C	N	N	A	A	N	C	C	C	C	A	C	C	C	N	A	N	A	A	A	N	C	A	A	A	C	C	M	A
2382	2382	M2382	SCSC-1_GI_9_1=S	C/A	3	CSC-1_GI_9_1=SCAFFOLD_1977=GI_9_2	829500	+	N	A	N	C	C	C	C	N	A	A	A	N	C	N	N	A	C	N	C	C	C	C	A	C	N	C	N	A	N	A	A	A	N	C	A	A	A	C	C	M	A
2383	2383	M2383	SCSC-1_GI_9_1=S	G/A	3	CSC-1_GI_9_1=SCAFFOLD_1977=GI_9_2	898011	+	N	A	N	G	G	A	G	N	A	A	A	N	A	N	N	A	G	N	G	G	G	G	A	G	N	G	N	A	N	A	A	A	N	G	A	A	A	G	G	R	A
2384	2384	M2384	SCSC-1_GI_9_1=S	A/C	3	CSC-1_GI_9_1=SCAFFOLD_1977=GI_9_2	913052	+	N	C	N	A	A	C	A	N	C	C	C	N	C	N	N	C	A	N	A	A	A	A	C	A	A	A	N	C	N	C	C	C	N	A	C	C	C	A	A	M	C
2385	2385	M2385	SCSC-1_GI_9_1=S	G/A	3	CSC-1_GI_9_1=SCAFFOLD_1977=GI_9_2	983581	+	G	A	N	G	G	A	G	N	A	A	A	N	G	N	N	A	A	N	G	G	G	G	A	G	N	G	N	A	N	A	A	A	N	G	A	A	A	G	G	R	A
2386	2386	M2386	SCSC-1_GI_9_1=S	A/G	3	CSC-1_GI_9_1=SCAFFOLD_1977=GI_9_2	983588	+	A	G	N	A	A	G	A	N	G	G	G	N	A	N	N	G	G	N	A	A	A	A	G	A	N	A	N	G	N	G	G	G	N	A	G	G	G	A	A	R	G
2387	2387	M2387	SCSC-1_GI_9_1=S	A/G	3	CSC-1_GI_9_1=SCAFFOLD_1977=GI_9_2	983597	+	A	G	N	A	A	G	A	N	G	G	G	N	A	N	N	G	G	N	A	A	A	A	G	A	N	A	N	G	N	G	G	G	N	A	G	G	G	A	A	R	G
2388	2388	M2388	SCSC-1_GI_9_1=S	A/G	3	CSC-1_GI_9_1=SCAFFOLD_1977=GI_9_2	1008030	+	N	G	N	A	A	G	A	N	G	G	G	N	A	N	N	G	G	N	A	A	A	A	G	A	A	A	N	G	N	G	G	G	N	A	G	G	G	A	A	R	G
2389	2389	M2389	SCSC-1_GI_9_1=S	C/T	3	CSC-1_GI_9_1=SCAFFOLD_1977=GI_9_2	1008081	+	N	T	N	C	C	T	C	N	T	T	T	N	C	N	N	T	T	N	C	C	C	C	T	C	C	C	N	T	N	T	T	T	N	C	T	T	T	C	C	Y	T
2390	2390	M2390	SCSC-1_GI_9_1=S	T/G	3	CSC-1_GI_9_1=SCAFFOLD_1977=GI_9_2	1044870	+	N	G	N	T	T	G	T	N	G	G	G	N	T	N	N	G	G	N	T	T	T	T	G	T	T	T	N	G	N	G	G	G	N	T	G	G	G	T	T	K	G
2391	2391	M2391	SCSC-1_GI_9_1=S	A/C	3	CSC-1_GI_9_1=SCAFFOLD_1977=GI_9_2	1044878	+	N	C	N	A	A	C	A	N	C	C	C	N	A	N	N	C	C	N	A	A	A	A	C	A	A	A	N	C	N	C	C	C	N	A	C	C	C	A	A	M	C
2392	2392	M2392	SCSC-1_GI_9_1=S	G/A	3	CSC-1_GI_9_1=SCAFFOLD_1977=GI_9_2	1044898	+	N	A	N	G	G	A	G	N	A	A	A	N	G	N	N	A	A	N	G	G	G	G	A	G	G	G	N	A	N	A	A	A	N	G	A	A	A	G	G	R	A
2393	2393	M2393	SCSC-1_GI_9_1=S	A/T	3	CSC-1_GI_9_1=SCAFFOLD_1977=GI_9_2	1050588	+	N	T	N	A	A	T	A	N	T	T	T	N	A	N	N	T	T	N	A	A	A	A	T	A	N	A	N	T	N	T	T	T	N	A	T	T	T	A	A	W	T
2394	2394	M2394	SCSC-1_GI_9_1=S	A/C	3	CSC-1_GI_9_1=SCAFFOLD_1977=GI_9_2	1050615	+	N	C	N	A	A	C	A	N	C	C	C	N	A	N	N	C	C	N	A	A	A	A	C	A	N	A	N	C	N	C	C	C	N	A	C	C	C	A	A	M	C
2395	2395	M2395	SCSC-1_GI_9_1=S	T/A	3	CSC-1_GI_9_1=SCAFFOLD_1977=GI_9_2	1050657	+	N	A	N	T	T	A	T	N	A	A	A	N	T	N	N	A	A	N	T	T	T	T	A	T	N	T	N	A	N	A	A	A	N	T	A	A	A	T	T	W	A
2396	2396	M2396	SCSC-1_GI_9_1=S	C/T	3	CSC-1_GI_9_1=SCAFFOLD_1977=GI_9_2	1052312	+	N	T	N	C	C	T	C	N	T	T	T	N	C	N	N	T	T	N	C	C	C	C	T	C	C	C	N	T	N	T	T	T	N	C	T	T	T	C	C	Y	Y
2397	2397	M2397	SCSC-1_GI_9_1=S	G/A	3	CSC-1_GI_9_1=SCAFFOLD_1977=GI_9_2	1073813	+	N	A	N	G	G	A	G	N	A	A	A	N	A	N	N	A	A	N	G	G	G	G	A	G	N	G	N	A	N	A	A	A	N	G	A	A	A	G	G	R	A
2398	2398	M2398	SCSC-1_GI_9_1=S	A/C	3	CSC-1_GI_9_1=SCAFFOLD_1977=GI_9_2	1096928	+	C	C	N	A	A	C	A	N	C	C	C	N	C	N	N	C	C	N	A	A	A	A	C	A	A	A	N	C	N	C	C	C	N	A	C	C	C	A	A	M	C
2399	2399	M2399	SCSC-1_GI_9_1=S	T/G	3	CSC-1_GI_9_1=SCAFFOLD_1977=GI_9_2	1096932	+	G	G	N	T	T	G	T	N	G	G	G	N	G	N	N	G	G	N	T	T	T	T	G	T	T	T	N	G	N	G	G	G	N	T	G	G	G	T	T	K	G
2400	2400	M2400	SCSC-1_GI_9_1=S	G/T	3	CSC-1_GI_9_1=SCAFFOLD_1977=GI_9_2	1096939	+	T	T	N	G	G	T	G	N	T	T	T	N	T	N	N	T	T	N	G	G	G	G	T	G	G	G	N	T	N	T	T	T	N	G	T	T	T	G	G	K	T
2401	2401	M2401	SCSC-1_GI_9_1=S	G/A	3	CSC-1_GI_9_1=SCAFFOLD_1977=GI_9_2	1096951	+	A	A	N	G	G	A	G	N	A	A	A	N	A	N	N	A	A	N	G	G	G	G	A	G	G	G	N	A	N	A	A	A	N	G	A	A	A	G	G	R	A
2402	2402	M2402	SCSC-1_GI_9_1=S	C/T	3	CSC-1_GI_9_1=SCAFFOLD_1977=GI_9_2	1137999	+	N	T	N	C	C	T	C	N	T	T	T	N	T	N	N	T	T	N	C	C	C	C	T	C	C	C	N	T	N	T	T	T	N	C	T	T	T	C	C	Y	T
2403	2403	M2403	SCSC-1_GI_9_1=S	T/C	3	CSC-1_GI_9_1=SCAFFOLD_1977=GI_9_2	1189960	+	N	T	N	C	C	T	C	N	T	T	T	N	T	N	N	T	T	N	C	C	C	C	T	C	N	C	N	T	N	T	T	T	N	C	T	T	T	C	C	Y	T
2408	2408	M2408	SCSC-1_GI_9_1=S	A/G	3	CSC-1_GI_9_1=SCAFFOLD_1977=GI_9_2	1204008	+	N	A	N	G	G	A	G	N	A	A	A	N	A	N	N	A	A	N	G	G	G	G	A	G	N	G	N	A	N	A	A	A	N	G	A	A	A	G	G	R	A
2409	2409	M2409	SCSC-1_GI_9_1=S	T/C	3	CSC-1_GI_9_1=SCAFFOLD_1977=GI_9_2	1212789	+	N	T	N	C	C	T	C	N	T	T	T	N	T	N	N	T	T	N	C	C	C	C	T	C	N	C	N	T	N	T	T	T	N	C	T	T	T	C	C	Y	T
2412	2412	M2412	SCSC-1_GI_9_1=S	G/C	3	CSC-1_GI_9_1=SCAFFOLD_1977=GI_9_2	1215635	+	N	G	N	C	C	G	C	N	G	G	G	N	G	N	N	G	G	N	C	C	C	C	G	C	C	C	N	G	N	G	G	G	N	C	G	G	G	C	C	S	G
2413	2413	M2413	SCSC-1_GI_9_1=S	A/T	3	CSC-1_GI_9_1=SCAFFOLD_1977=GI_9_2	1231783	+	A	A	N	T	T	A	T	N	A	A	A	N	A	N	N	A	A	N	T	T	T	T	A	T	T	T	N	A	N	A	A	A	N	T	A	A	A	T	T	W	A
2414	2414	M2414	SCSC-1_GI_9_1=S	T/G	3	CSC-1_GI_9_1=SCAFFOLD_1977=GI_9_2	1231932	+	N	T	T	G	G	T	G	N	T	T	T	N	T	N	N	T	T	N	G	G	G	G	T	G	G	G	N	T	N	T	T	T	N	N	T	T	T	G	G	K	T
2415	2415	M2415	SCSC-1_GI_9_1=S	A/T	3	CSC-1_GI_9_1=SCAFFOLD_1977=GI_9_2	1231941	+	N	A	A	T	T	A	T	N	A	A	A	N	A	N	N	A	A	N	T	T	T	T	A	T	T	T	N	A	N	A	A	A	N	N	A	A	A	T	T	W	A
2416	2416	M2416	SCSC-1_GI_9_1=S	A/C	3	CSC-1_GI_9_1=SCAFFOLD_1977=GI_9_2	1233300	+	N	C	N	A	A	C	A	N	C	C	C	N	C	N	N	C	C	N	A	A	A	A	C	A	A	A	N	C	N	C	C	C	N	A	C	C	C	A	A	M	C
2417	2417	M2417	SCSC-1_GI_9_1=S	C/T	3	CSC-1_GI_9_1=SCAFFOLD_1977=GI_9_2	1233307	+	N	T	N	C	C	T	C	N	T	T	T	N	T	N	N	T	T	N	C	C	C	C	T	C	C	C	N	T	N	T	T	T	N	C	T	T	T	C	C	Y	T
2418	2418	M2418	SCSC-1_GI_9_1=S	C/T	3	CSC-1_GI_9_1=SCAFFOLD_1977=GI_9_2	1233339	+	N	C	N	T	T	C	T	N	C	C	C	N	C	N	N	C	C	N	T	T	T	T	C	T	T	T	N	C	N	C	C	C	N	T	C	C	C	T	T	Y	C
2427	2427	M2427	SCSC-1_GI_9_1=S	G/A	3	CSC-1_GI_9_1=SCAFFOLD_1977=GI_9_2	1369815	+	N	G	N	A	A	G	A	N	G	G	G	N	G	N	N	G	G	N	A	A	A	A	G	A	N	A	N	G	N	G	G	G	N	A	G	G	G	A	A	R	G
2428	2428	M2428	SCSC-1_GI_9_1=S	A/C	3	CSC-1_GI_9_1=SCAFFOLD_1977=GI_9_2	1369827	+	N	A	N	C	C	A	C	N	A	A	A	N	A	N	N	A	A	N	C	C	C	C	A	C	N	C	N	A	N	A	A	A	N	C	A	A	A	C	C	M	A
2429	2429	M2429	SCSC-1_GI_9_1=S	G/A	3	CSC-1_GI_9_1=SCAFFOLD_1977=GI_9_2	1441117	+	N	A	A	G	G	A	G	N	A	A	A	N	A	N	N	A	N	N	G	G	G	G	A	G	G	G	N	A	N	A	A	A	N	G	A	A	A	G	G	R	A
2430	2430	M2430	SCSC-1_GI_9_1=S	A/C	3	CSC-1_GI_9_1=SCAFFOLD_1977=GI_9_2	1551723	+	N	C	N	A	A	C	A	N	C	C	C	N	C	N	N	C	C	N	A	A	A	A	A	A	N	A	N	C	N	C	C	C	N	A	C	C	C	A	N	M	C
2431	2431	M2431	SCSC-1_GI_9_1=S	C/T	3	CSC-1_GI_9_1=SCAFFOLD_1977=GI_9_2	1551729	+	N	T	N	C	C	T	C	N	T	T	T	N	T	N	N	T	T	N	C	C	C	C	C	C	N	C	N	T	N	T	T	T	N	C	T	T	T	C	N	Y	T
2435	2435	M2435	SCSC-1_GI_9_1=S	T/C	3	CSC-1_GI_9_1=SCAFFOLD_1977=GI_9_2	1608794	+	N	T	N	C	C	T	C	N	T	T	T	N	T	N	N	T	T	N	C	C	C	C	C	C	N	C	N	T	N	T	T	T	N	C	T	T	T	C	C	Y	T
2436	2436	M2436	SCSC-1_GI_9_1=S	G/T	3	CSC-1_GI_9_1=SCAFFOLD_1977=GI_9_2	1660577	+	N	G	G	T	T	G	T	N	G	G	G	N	G	G	N	G	G	N	T	T	T	T	T	T	T	T	N	G	N	G	G	G	N	T	G	G	G	T	T	K	G
2438	2438	M2438	SCSC-1_GI_9_1=S	T/A	3	CSC-1_GI_9_1=SCAFFOLD_1977=GI_9_2	1727476	+	N	T	N	A	T	T	A	N	T	T	T	N	T	N	N	T	T	N	A	A	A	A	A	T	N	A	N	T	N	T	T	T	N	A	T	T	T	A	A	A	T
2439	2439	M2439	SCSC-1_GI_9_1=S	A/G	3	CSC-1_GI_9_1=SCAFFOLD_1977=GI_9_2	1727478	+	N	A	N	G	A	A	G	N	A	A	A	N	A	N	N	A	A	N	G	G	G	G	G	A	N	G	N	A	N	A	A	A	N	G	A	A	A	G	G	G	A
2440	2440	M2440	SCSC-1_GI_9_1=S	C/A	3	CSC-1_GI_9_1=SCAFFOLD_1977=GI_9_2	1736612	+	N	C	N	A	C	C	A	N	C	C	C	N	C	N	N	C	C	N	A	A	A	A	A	C	A	A	N	C	N	C	C	C	N	A	C	C	C	A	A	A	C
2441	2441	M2441	SCSC-1_GI_9_1=S	T/A	3	CSC-1_GI_9_1=SCAFFOLD_1977=GI_9_2	1736618	+	N	T	N	A	T	T	A	N	T	T	T	N	T	N	N	T	T	N	A	A	A	A	A	T	A	A	N	T	N	T	T	T	N	A	T	T	T	A	A	A	T
2443	2443	M2443	SCSC-1_GI_9_1=S	G/A	3	CSC-1_GI_9_1=SCAFFOLD_1977=GI_9_2	1769230	+	N	G	N	A	G	G	A	N	G	G	G	N	G	N	N	G	G	N	A	A	A	A	A	G	A	A	N	G	N	G	G	G	N	A	G	G	G	A	A	A	G
2444	2444	M2444	SCSC-1_GI_9_1=S	T/C	3	CSC-1_GI_9_1=SCAFFOLD_1977=GI_9_2	1769254	+	N	T	N	C	T	T	C	N	T	T	T	N	T	N	N	T	T	N	C	C	C	C	C	T	C	C	N	T	N	T	T	T	N	C	T	T	T	C	C	C	T
2445	2445	M2445	SCSC-1_GI_9_1=S	T/G	3	CSC-1_GI_9_1=SCAFFOLD_1977=GI_9_2	1773856	+	N	T	N	G	T	T	G	N	T	T	T	N	T	N	N	T	T	N	G	G	G	G	G	T	G	G	N	T	N	T	T	T	N	G	T	T	T	G	G	G	T
2446	2446	M2446	SCSC-1_GI_9_1=S	A/C	3	CSC-1_GI_9_1=SCAFFOLD_1977=GI_9_2	1793651	+	N	A	N	C	A	A	C	N	A	A	A	N	A	N	N	A	A	N	C	C	C	C	C	A	N	C	N	A	N	A	A	A	N	C	A	A	A	C	C	C	A
2447	2447	M2447	SCSC-1_GI_9_1=S	G/C	3	CSC-1_GI_9_1=SCAFFOLD_1977=GI_9_2	1793666	+	N	G	N	C	G	G	C	N	G	G	G	N	G	N	N	G	G	N	C	C	C	C	C	G	N	C	N	G	N	G	G	G	N	C	G	G	G	C	C	C	G
2448	2448	M2448	SCSC-1_GI_9_1=S	A/G	3	CSC-1_GI_9_1=SCAFFOLD_1977=GI_9_2	1793675	+	N	A	N	G	A	A	G	N	A	A	A	N	A	N	N	A	A	N	G	G	G	G	G	A	N	G	N	A	N	A	A	A	N	G	A	A	A	G	G	G	A
2449	2449	M2449	SCSC-1_GI_9_1=S	C/T	3	CSC-1_GI_9_1=SCAFFOLD_1977=GI_9_2	1830976	+	N	C	N	T	C	C	T	N	C	C	C	N	C	N	N	C	C	N	T	T	T	T	T	C	T	T	N	C	N	C	C	C	N	T	C	C	C	T	T	T	C
2450	2450	M2450	SCSC-1_GI_9_1=S	G/T	3	CSC-1_GI_9_1=SCAFFOLD_1977=GI_9_2	1830983	+	N	G	N	T	G	G	T	N	G	G	G	N	G	N	N	G	G	N	T	T	T	T	T	G	T	T	N	G	N	G	G	G	N	T	G	G	G	T	T	T	G
2453	2453	M2453	SCSC-1_GI_9_1=S	C/T	3	CSC-1_GI_9_1=SCAFFOLD_1977=GI_9_2	1832613	+	N	C	N	T	C	C	T	N	C	C	C	N	C	C	N	C	C	N	T	T	T	T	T	C	N	T	N	C	N	C	C	C	N	T	C	C	C	T	T	T	C
2454	2454	M2454	SCSC-1_GI_9_1=S	C/T	3	CSC-1_GI_9_1=SCAFFOLD_1977=GI_9_2	1833220	+	N	C	C	T	C	C	T	N	C	N	C	N	C	N	N	C	C	N	T	T	T	T	T	C	T	T	N	C	N	C	C	C	N	T	C	C	C	T	T	T	C
2455	2455	M2455	SCSC-1_GI_9_1=S	A/T	3	CSC-1_GI_9_1=SCAFFOLD_1977=GI_9_2	1833222	+	N	A	A	T	A	A	T	N	A	N	A	N	A	N	N	A	A	N	T	T	T	T	T	A	T	T	N	A	N	A	A	A	N	T	A	A	A	T	T	T	A
2456	2456	M2456	SCSC-1_GI_9_1=S	G/A	3	CSC-1_GI_9_1=SCAFFOLD_1977=GI_9_2	1833469	+	N	G	N	A	G	G	A	N	G	G	G	N	G	N	N	G	G	N	A	A	A	A	A	G	N	A	N	G	N	G	G	G	N	A	G	G	G	A	A	A	G
2463	2463	M2463	SCSC-1_GI_9_1=S	T/C	3	CSC-1_GI_9_1=SCAFFOLD_1977=GI_9_2	2044606	+	N	C	C	T	C	C	T	N	C	C	C	N	C	N	N	C	C	N	T	T	T	T	T	C	T	T	N	C	N	C	C	C	N	T	C	C	C	T	T	T	C
2464	2464	M2464	SCSC-1_GI_9_1=S	A/T	3	CSC-1_GI_9_1=SCAFFOLD_1977=GI_9_2	2044754	+	N	T	N	A	T	T	A	N	T	T	T	N	T	N	N	T	T	N	A	A	A	A	A	T	N	A	N	T	N	T	T	T	N	A	T	T	T	A	A	A	T
2465	2465	M2465	SCSC-1_GI_9_1=S	G/A	3	CSC-1_GI_9_1=SCAFFOLD_1977=GI_9_2	2044771	+	N	A	N	G	A	A	G	N	A	A	A	N	A	N	N	A	A	N	G	G	G	G	G	A	N	G	N	A	N	A	A	A	N	G	A	A	A	G	G	G	A
2466	2466	M2466	SCSC-1_GI_9_1=S	C/G	3	CSC-1_GI_9_1=SCAFFOLD_1977=GI_9_2	2044772	+	N	G	N	C	G	G	C	N	G	G	G	N	G	N	N	G	G	N	C	C	C	C	C	G	N	C	N	G	N	G	G	G	N	C	G	G	G	C	C	C	G
2467	2467	M2467	SCSC-1_GI_9_1=S	T/G	3	CSC-1_GI_9_1=SCAFFOLD_1977=GI_9_2	2044783	+	N	G	N	T	G	G	T	N	G	G	G	N	G	N	N	G	G	N	T	T	T	T	T	G	N	T	N	G	N	G	G	G	N	T	G	G	G	T	T	T	G
2468	2468	M2468	SCSC-1_GI_9_1=S	T/C	3	CSC-1_GI_9_1=SCAFFOLD_1977=GI_9_2	2062381	+	N	T	N	C	T	T	C	N	T	T	T	N	T	T	N	T	T	N	C	C	C	C	C	T	C	C	N	T	N	T	T	T	N	C	T	T	T	C	C	C	T
2469	2469	M2469	SCSC-1_GI_9_1=S	T/C	3	CSC-1_GI_9_1=SCAFFOLD_1977=GI_9_2	2062391	+	N	T	N	C	T	T	C	N	T	T	T	N	T	T	N	T	T	N	C	C	C	C	C	T	C	C	N	T	N	T	T	T	N	C	T	T	T	C	C	C	T
2470	2470	M2470	SCSC-1_GI_9_1=S	T/C	3	CSC-1_GI_9_1=SCAFFOLD_1977=GI_9_2	2563866	+	N	C	N	T	T	C	C	N	C	C	C	N	C	N	N	C	C	N	T	T	T	T	T	C	N	T	N	Y	N	C	C	T	N	T	C	T	C	T	C	T	C
2471	2471	M2471	SCSC-1_GI_9_1=S	T/C	3	CSC-1_GI_9_1=SCAFFOLD_1977=GI_9_2	2563874	+	N	C	N	T	T	C	C	N	C	C	C	N	C	N	N	C	C	N	T	T	T	T	T	C	N	T	N	Y	N	C	C	T	N	T	C	T	C	T	C	T	C
2472	2472	M2472	SCSC-1_GI_9_1=S	A/T	3	CSC-1_GI_9_1=SCAFFOLD_1977=GI_9_2	2563895	+	N	T	N	A	A	T	T	N	T	T	T	N	T	N	N	T	T	N	A	A	A	A	A	T	N	A	N	W	N	T	T	A	N	A	T	A	T	A	T	A	T
2473	2473	M2473	SCSC-1_GI_9_1=S	T/A	3	CSC-1_GI_9_1=SCAFFOLD_1977=GI_9_2	2563916	+	N	A	N	T	T	A	A	N	A	A	A	N	A	N	N	A	A	N	T	T	T	T	T	A	N	T	N	W	N	A	A	T	N	T	A	T	A	T	A	T	A
2474	2474	M2474	SCSC-1_GI_9_1=S	C/A	3	CSC-1_GI_9_1=SCAFFOLD_1977=GI_9_2	2587929	+	N	A	N	C	C	A	A	N	A	A	A	N	A	N	N	A	A	N	C	C	C	C	C	A	N	C	N	M	N	A	A	A	N	C	A	C	A	C	A	C	A
2475	2475	M2475	SCSC-1_GI_9_1=S	T/G	3	CSC-1_GI_9_1=SCAFFOLD_1977=GI_9_2	2674923	+	N	G	T	T	T	G	G	N	G	G	G	N	G	N	N	G	G	N	T	T	T	T	T	G	G	T	N	K	N	G	G	K	N	T	G	T	G	T	G	T	G
2476	2476	M2476	SCSC-1_GI_9_1=S	T/A	3	CSC-1_GI_9_1=SCAFFOLD_1977=GI_9_2	2679176	+	N	A	N	T	T	A	A	N	A	A	A	N	A	N	N	A	A	N	T	T	T	T	T	A	N	T	N	W	N	A	A	A	N	T	A	T	A	T	A	T	A
2477	2477	M2477	SCSC-1_GI_9_1=S	T/G	3	CSC-1_GI_9_1=SCAFFOLD_1977=GI_9_2	2727929	+	N	G	N	T	T	G	G	N	G	G	G	N	G	N	N	G	G	N	T	T	T	T	T	G	N	T	N	K	N	G	G	G	N	T	G	T	G	T	G	T	G
2478	2478	M2478	SCSC-1_GI_9_1=S	G/C	3	CSC-1_GI_9_1=SCAFFOLD_1977=GI_9_2	2743221	+	N	C	N	G	G	C	C	N	C	C	C	N	C	N	N	C	C	N	G	G	G	G	G	C	C	G	N	S	N	C	C	C	N	G	C	G	C	G	C	G	C
2479	2479	M2479	SCSC-1_GI_9_1=S	C/T	3	CSC-1_GI_9_1=SCAFFOLD_1977=GI_9_2	2743228	+	N	T	N	C	C	T	T	N	T	T	T	N	T	N	N	T	T	N	C	C	C	C	C	T	T	C	N	Y	N	T	T	T	N	C	T	C	T	C	T	C	T
2480	2480	M2480	SCSC-1_GI_9_1=S	G/T	3	CSC-1_GI_9_1=SCAFFOLD_1977=GI_9_2	2743295	+	N	T	N	G	G	T	T	N	T	T	T	N	T	N	N	T	T	N	G	G	G	G	G	T	N	G	N	K	N	T	T	T	N	G	T	G	T	G	T	G	T
2481	2481	M2481	SCSC-1_GI_9_1=S	A/T	3	CSC-1_GI_9_1=SCAFFOLD_1977=GI_9_2	2743307	+	N	T	N	A	A	T	T	N	T	T	T	N	T	N	N	T	T	N	A	A	A	A	A	T	N	A	N	W	N	T	T	T	N	A	T	A	T	A	T	A	T
2482	2482	M2482	SCSC-1_GI_9_1=S	G/A	3	CSC-1_GI_9_1=SCAFFOLD_1977=GI_9_2	2743348	+	N	A	N	G	G	A	A	N	A	A	A	N	A	N	N	A	A	N	G	G	G	G	G	A	N	G	N	R	N	A	A	A	N	G	A	G	A	G	A	G	A
2483	2483	M2483	SCSC-1_GI_9_1=S	G/A	3	CSC-1_GI_9_1=SCAFFOLD_1977=GI_9_2	2748025	+	N	A	N	G	G	A	A	N	A	A	A	N	A	N	N	A	A	N	G	G	G	G	G	A	N	G	N	R	N	A	A	A	N	G	A	G	A	G	A	G	A
2484	2484	M2484	SCSC-1_GI_9_1=S	T/C	3	CSC-1_GI_9_1=SCAFFOLD_1977=GI_9_2	2748104	+	N	C	N	T	T	C	C	N	C	C	C	N	C	N	N	C	C	N	T	T	T	T	T	C	C	T	N	Y	N	C	C	C	N	T	C	T	C	T	C	T	C
2486	2486	M2486	SCSC-1_GI_9_1=S	A/G	3	CSC-1_GI_9_1=SCAFFOLD_1977=GI_9_2	2789292	+	N	G	N	A	A	G	G	N	G	G	G	N	G	N	N	G	G	N	A	A	A	A	A	A	N	A	N	R	N	G	G	G	N	A	G	A	G	A	G	A	G
2489	2489	M2489	SCSC-1_GI_9_1=S	A/G	3	CSC-1_GI_9_1=SCAFFOLD_1977=GI_9_2	2795658	+	N	G	A	A	A	G	G	N	G	G	G	N	G	N	N	G	G	N	A	A	A	A	A	A	G	A	N	R	N	G	G	G	N	A	G	A	G	A	R	A	G
2490	2490	M2490	SCSC-1_GI_9_1=S	A/C	3	CSC-1_GI_9_1=SCAFFOLD_1977=GI_9_2	2918892	+	N	C	N	A	A	C	C	N	C	C	C	N	C	N	N	C	C	N	A	A	A	A	A	A	C	A	N	M	N	C	C	C	N	A	C	A	C	A	C	A	C
2491	2491	M2491	SCSC-1_GI_9_1=S	T/C	3	CSC-1_GI_9_1=SCAFFOLD_1977=GI_9_2	2918950	+	C	C	N	T	T	C	C	N	C	C	C	N	C	N	N	C	C	N	T	T	T	T	T	T	C	T	N	Y	N	C	C	C	N	T	C	T	C	T	C	T	C
2492	2492	M2492	SCSC-1_GI_9_1=S	T/G	3	CSC-1_GI_9_1=SCAFFOLD_1977=GI_9_2	2935738	+	N	G	N	T	T	G	G	N	G	K	G	N	G	N	N	G	G	N	T	T	T	T	T	T	N	T	N	K	N	G	G	G	N	T	G	T	G	T	G	T	G
2493	2493	M2493	SCSC-1_GI_9_1=S	G/A	3	CSC-1_GI_9_1=SCAFFOLD_1977=GI_9_2	2935751	+	N	A	N	G	G	A	A	N	A	R	A	N	A	N	N	A	A	N	G	G	G	G	G	G	N	G	N	R	N	A	A	A	N	G	A	G	A	G	A	G	A
2494	2494	M2494	SCSC-1_GI_9_1=S	T/A	3	CSC-1_GI_9_1=SCAFFOLD_1977=GI_9_2	2974024	+	N	A	N	T	T	A	A	N	A	A	A	N	A	N	N	A	A	N	T	T	T	T	T	T	A	T	N	W	N	A	A	A	N	T	A	T	A	T	A	T	A
2495	2495	M2495	SCSC-1_GI_9_1=S	A/G	3	CSC-1_GI_9_1=SCAFFOLD_1977=GI_9_2	2974033	+	N	G	N	A	A	G	G	N	G	G	G	N	G	N	N	G	G	N	A	A	A	A	A	A	G	A	N	R	N	G	G	G	N	A	G	A	G	A	G	A	G
2496	2496	M2496	SCSC-1_GI_9_1=S	C/T	3	CSC-1_GI_9_1=SCAFFOLD_1977=GI_9_2	2974273	+	N	T	N	C	C	T	T	N	T	T	T	N	T	N	N	T	T	N	C	C	C	C	C	C	N	C	N	Y	N	T	T	T	N	C	T	C	T	C	T	C	T
2497	2497	M2497	SCSC-1_GI_9_1=S	A/G	3	CSC-1_GI_9_1=SCAFFOLD_1977=GI_9_2	3116947	+	N	G	N	A	A	G	G	N	G	G	G	N	G	N	N	G	G	N	A	G	A	A	A	A	N	A	N	R	N	G	G	G	N	A	G	A	A	A	G	A	A
2498	2498	M2498	SCSC-1_GI_9_1=S	G/A	3	CSC-1_GI_9_1=SCAFFOLD_1977=GI_9_2	3116975	+	N	A	G	G	G	A	A	N	A	A	A	N	A	N	N	A	A	N	G	A	G	G	G	G	A	G	N	R	N	A	A	A	N	G	A	G	G	G	A	G	G
2499	2499	M2499	SCSC-1_GI_9_1=S	G/T	3	CSC-1_GI_9_1=SCAFFOLD_1977=GI_9_2	3161309	+	N	T	N	G	G	T	T	N	T	T	T	N	T	N	N	T	T	N	G	T	G	G	G	G	T	G	N	K	N	T	T	T	N	G	T	G	G	G	T	G	G
2500	2500	M2500	SCSC-1_GI_9_1=S	G/A	3	CSC-1_GI_9_1=SCAFFOLD_1977=GI_9_2	3162800	+	N	A	N	G	G	A	A	N	A	A	A	N	A	N	N	A	A	N	G	A	G	G	G	G	N	G	N	R	N	A	A	A	N	G	A	G	G	G	A	G	G
2506	2506	M2506	SCSC-1_GI_9_1=S	G/A	3	CSC-1_GI_9_1=SCAFFOLD_1977=GI_9_2	3318211	+	N	G	N	A	A	G	G	N	G	G	G	N	G	N	N	G	G	N	A	G	A	A	A	G	N	A	N	R	N	G	G	G	N	A	G	A	A	A	G	A	A
2507	2507	M2507	SCSC-1_GI_9_1=S	T/C	3	CSC-1_GI_9_1=SCAFFOLD_1977=GI_9_2	3318680	+	N	T	N	C	C	T	T	N	T	T	T	N	T	N	N	T	T	N	C	T	C	C	C	T	T	C	N	Y	N	T	T	T	N	C	T	C	C	C	T	C	C
2528	2528	M2528	SCSC-1_GI_9_1=S	T/C	3	CSC-1_GI_9_1=SCAFFOLD_1977=GI_9_2	3590691	+	T	T	N	C	C	T	T	N	T	N	T	N	T	N	N	T	T	N	C	T	C	C	C	T	N	C	N	C	N	T	T	T	N	C	T	T	T	C	T	C	C
2529	2529	M2529	SCSC-1_GI_9_1=S	C/T	3	CSC-1_GI_9_1=SCAFFOLD_1977=GI_9_2	3621775	+	N	C	N	T	T	C	C	N	C	C	C	N	C	N	N	C	C	N	T	C	T	T	T	C	C	T	N	T	N	C	C	C	N	T	C	C	C	T	C	T	T
2530	2530	M2530	SCSC-1_GI_9_1=S	G/A	3	CSC-1_GI_9_1=SCAFFOLD_1977=GI_9_2	3622056	+	N	G	N	A	A	G	G	N	G	G	G	N	G	N	N	G	G	N	A	G	A	A	A	G	G	A	N	A	N	G	G	G	N	A	G	G	G	A	G	A	A
2735	2735	M2735	SCSC-1_GI_9_1=S	C/T	3	CSC-1_GI_9_1=SCAFFOLD_1977=GI_9_2	4135553	+	N	C	N	T	T	C	C	N	C	C	C	N	C	N	N	C	C	N	T	C	T	T	T	C	N	T	N	T	N	C	C	C	N	T	C	C	C	T	C	T	T
2736	2736	M2736	SCSC-1_GI_9_1=S	T/G	3	CSC-1_GI_9_1=SCAFFOLD_1977=GI_9_2	4135555	+	N	T	N	G	G	T	T	N	T	T	T	N	T	N	N	T	T	N	G	T	G	G	G	T	N	G	N	G	N	T	T	T	N	G	T	T	T	G	T	G	G
2741	2741	M2741	SCSC-1_GI_9_1=S	G/C	3	CSC-1_GI_9_1=SCAFFOLD_1977=GI_9_2	4187900	+	N	G	N	C	C	G	G	N	G	G	G	N	G	N	N	G	G	N	C	G	C	C	C	G	N	C	N	C	N	G	G	G	N	C	G	G	G	C	G	C	C
2753	2753	M2753	SCSC-1_GI_9_1=S	A/G	3	CSC-1_GI_9_1=SCAFFOLD_1977=GI_9_2	4203549	+	N	A	N	G	G	A	A	N	A	A	A	A	A	N	N	A	A	N	G	A	G	G	G	A	N	G	N	G	N	A	A	A	N	G	A	A	A	G	A	G	G
2916	2916	M2916	SCSC-1_GI_9_1=S	C/T	3	CSC-1_GI_9_1=SCAFFOLD_1977=GI_9_2	4354409	+	N	C	N	T	T	C	C	N	C	C	C	N	C	N	N	C	C	N	T	C	T	T	T	C	C	T	N	T	N	C	C	C	N	T	C	C	C	T	C	T	T
2917	2917	M2917	SCSC-1_GI_9_1=S	A/C	3	CSC-1_GI_9_1=SCAFFOLD_1977=GI_9_2	4358180	+	N	A	N	C	C	A	A	N	A	A	A	N	A	N	N	A	A	N	C	A	C	C	C	A	A	C	N	C	N	A	A	A	N	C	A	A	A	C	A	C	C
3157	3157	M3157	SCSC-1_GI_9_1=S	T/C	3	CSC-1_GI_9_1=SCAFFOLD_1977=GI_9_2	4571266	+	N	T	N	C	C	T	T	N	T	T	T	N	T	N	N	T	T	N	C	T	C	C	C	T	T	C	N	C	N	T	T	T	N	C	T	T	T	C	T	C	C
3158	3158	M3158	SCSC-1_GI_9_1=S	A/T	3	CSC-1_GI_9_1=SCAFFOLD_1977=GI_9_2	4571289	+	N	A	N	T	T	A	A	N	A	A	A	N	A	N	N	A	A	N	T	A	T	T	T	A	A	T	N	T	N	A	A	A	N	T	A	A	A	T	A	T	T
3195	3195	M3195	SCSC-1_GI_9_1=S	G/C	3	CSC-1_GI_9_1=SCAFFOLD_1977=GI_9_2	4596816	+	N	G	N	C	C	G	G	N	G	G	G	N	G	N	N	G	G	N	C	G	C	C	C	G	N	C	N	C	N	G	G	G	N	C	G	G	G	C	G	C	C
3398	3398	M3398	SCSC-1_GI_9_1=S	G/A	3	CSC-1_GI_9_1=SCAFFOLD_1977=GI_9_2	5207589	+	N	G	A	A	A	G	G	N	G	G	G	N	G	N	N	G	G	N	A	G	A	A	A	G	G	A	N	A	N	G	G	G	N	A	G	G	G	A	G	A	A
3399	3399	M3399	SCSC-1_GI_9_1=S	G/C	3	CSC-1_GI_9_1=SCAFFOLD_1977=GI_9_2	5207611	+	N	G	C	C	C	G	G	N	G	G	G	N	G	N	N	G	G	N	C	G	C	C	C	G	G	C	N	C	N	G	G	G	N	C	G	G	G	C	G	C	C
3414	3414	M3414	SCSC-1_GI_9_1=S	G/A	3	CSC-1_GI_9_1=SCAFFOLD_1977=GI_9_2	5578304	+	N	G	N	A	A	G	G	N	G	G	G	N	G	N	N	G	A	N	A	G	A	A	A	G	N	A	N	A	N	G	G	G	N	A	G	G	G	A	G	A	A
3415	3415	M3415	SCSC-1_GI_9_1=S	A/T	3	CSC-1_GI_9_1=SCAFFOLD_1977=GI_9_2	5591760	+	A	A	N	T	T	A	A	N	A	A	A	N	A	N	N	A	T	N	T	A	T	T	T	A	N	T	N	T	N	A	A	A	N	T	A	A	A	T	A	T	T
3416	3416	M3416	SCSC-1_GI_9_1=S	G/T	3	CSC-1_GI_9_1=SCAFFOLD_1977=GI_9_2	5591785	+	G	G	N	T	T	G	G	N	G	G	G	N	G	N	N	G	T	N	T	G	T	T	T	G	N	T	N	T	N	G	G	G	N	T	G	G	G	T	G	T	T
3417	3417	M3417	SCSC-1_GI_9_1=S	T/C	3	CSC-1_GI_9_1=SCAFFOLD_1977=GI_9_2	5618972	+	N	T	N	C	C	T	T	N	T	T	T	N	T	N	N	T	C	N	C	T	C	C	C	T	N	C	N	C	N	T	T	T	N	C	T	T	T	C	T	C	C
3419	3419	M3419	SCSC-1_GI_9_1=S	T/A	3	CSC-1_GI_9_1=SCAFFOLD_1977=GI_9_2	5830036	+	N	T	N	A	A	T	T	N	T	T	T	N	T	N	N	T	T	N	A	T	A	A	A	T	N	A	N	A	N	T	T	T	N	A	T	T	T	A	T	A	A
3420	3420	M3420	SCSC-1_GI_9_1=S	T/A	3	CSC-1_GI_9_1=SCAFFOLD_1977=GI_9_2	5967576	+	N	T	N	A	A	T	T	N	T	T	T	N	T	N	N	T	T	N	A	T	A	A	A	T	A	A	N	A	N	T	T	T	N	A	T	T	T	A	T	A	A
3421	3421	M3421	SCSC-1_GI_9_1=S	G/C	3	CSC-1_GI_9_1=SCAFFOLD_1977=GI_9_2	6603388	+	N	C	N	G	G	C	C	N	C	C	C	N	C	N	N	C	G	N	G	C	G	G	G	C	N	G	N	G	N	C	C	G	N	G	C	C	G	G	C	G	G
3422	3422	M3422	SCSC-1_GI_9_1=S	G/T	3	CSC-1_GI_9_1=SCAFFOLD_1977=GI_9_2	6641760	+	N	G	N	G	G	T	T	N	T	T	T	N	T	N	N	T	G	N	G	T	G	G	G	T	N	G	N	G	N	T	T	G	N	G	T	T	G	G	T	G	G
3423	3423	M3423	SCSC-1_GI_9_1=S	G/A	3	CSC-1_GI_9_1=SCAFFOLD_1977=GI_9_2	6663603	+	N	G	N	G	G	A	A	N	A	A	A	N	A	N	N	A	G	N	G	A	G	G	G	A	N	G	N	G	N	A	A	G	N	G	A	A	G	G	A	G	G
3424	3424	M3424	SCSC-1_GI_9_1=S	T/A	3	CSC-1_GI_9_1=SCAFFOLD_1977=GI_9_2	6673698	+	N	T	N	T	T	A	A	N	A	A	A	N	A	N	N	A	N	N	T	A	T	T	T	A	N	T	N	T	N	A	A	T	N	T	A	A	T	T	A	T	T
3425	3425	M3425	SCSC-1_GI_9_1=S	A/G	3	CSC-1_GI_9_1=SCAFFOLD_1977=GI_9_2	6788233	+	N	A	N	A	A	G	G	N	G	G	G	N	G	N	N	G	A	N	A	G	A	A	A	G	N	A	N	A	N	G	G	A	N	A	G	G	A	A	G	A	A
3426	3426	M3426	SCSC-1_GI_9_1=S	G/A	3	CSC-1_GI_9_1=SCAFFOLD_1977=GI_9_2	6788236	+	N	G	N	G	G	A	A	N	A	A	A	N	A	N	N	A	G	N	G	A	G	G	G	A	N	G	N	G	N	A	A	G	N	G	A	A	G	G	A	G	G
3427	3427	M3427	SCSC-1_GI_9_1=S	C/T	3	CSC-1_GI_9_1=SCAFFOLD_1977=GI_9_2	6788239	+	N	C	N	C	C	T	T	N	T	T	T	N	T	N	N	T	C	N	C	T	C	C	C	T	N	C	N	C	N	T	T	C	N	C	T	T	C	C	T	C	C
3429	3429	M3429	SCSC-1_GI_9_1=S	C/T	3	CSC-1_GI_9_1=SCAFFOLD_1977=GI_9_2	6788619	+	N	C	N	C	C	T	T	N	T	N	T	N	T	N	N	T	C	N	C	T	C	C	C	T	C	C	N	C	N	T	T	C	N	C	T	T	C	C	T	C	C
3431	3431	M3431	SCSC-1_GI_9_1=S	A/G	3	CSC-1_GI_9_1=SCAFFOLD_1977=GI_9_2	6788785	+	N	A	N	A	A	G	G	N	G	G	G	N	G	N	N	G	A	N	A	G	A	A	A	G	A	A	N	A	N	G	G	A	N	A	G	G	A	A	G	A	A
3432	3432	M3432	SCSC-1_GI_9_1=S	G/A	3	CSC-1_GI_9_1=SCAFFOLD_1977=GI_9_2	6789258	+	N	G	N	G	G	A	A	N	A	A	A	N	A	N	N	A	G	N	G	A	G	G	G	A	N	G	N	G	N	A	A	G	N	G	A	A	G	G	A	G	G
3433	3433	M3433	SCSC-1_GI_9_1=S	A/G	3	CSC-1_GI_9_1=SCAFFOLD_1977=GI_9_2	6835535	+	N	G	N	A	A	G	G	N	G	G	G	A	G	N	N	G	A	N	A	G	A	A	A	G	N	A	N	A	N	G	G	A	N	A	G	G	A	A	G	A	A
3434	3434	M3434	SCSC-1_GI_9_1=S	A/C	3	CSC-1_GI_9_1=SCAFFOLD_1977=GI_9_2	6835572	+	N	C	N	A	A	C	C	N	C	C	C	A	C	N	N	C	A	N	A	C	A	A	A	C	N	A	N	A	N	C	C	A	N	A	C	C	A	A	C	A	A
3435	3435	M3435	SCSC-1_GI_9_1=S	C/A	3	CSC-1_GI_9_1=SCAFFOLD_1977=GI_9_2	6899638	+	N	A	N	C	C	A	A	N	A	A	A	N	A	N	N	A	C	N	C	A	C	C	C	A	N	C	N	C	N	A	A	C	N	C	A	A	C	C	A	C	C
3436	3436	M3436	SCSC-1_GI_9_1=S	A/T	3	CSC-1_GI_9_1=SCAFFOLD_1977=GI_9_2	6899656	+	N	T	N	A	A	T	T	N	T	T	T	N	T	N	N	T	A	N	A	T	A	A	A	T	N	A	N	A	N	T	T	A	N	A	T	T	A	A	T	A	A
3437	3437	M3437	SCSC-1_GI_9_1=S	G/C	3	CSC-1_GI_9_1=SCAFFOLD_1977=GI_9_2	7173673	+	N	C	N	C	G	G	C	N	C	C	C	N	G	N	N	C	G	N	G	C	G	G	G	C	N	G	N	G	N	G	C	G	N	G	C	C	G	G	C	G	G
3438	3438	M3438	SCSC-1_GI_9_1=S	T/C	3	CSC-1_GI_9_1=SCAFFOLD_1977=GI_9_2	7271984	+	C	C	C	C	T	T	C	N	C	C	C	N	T	N	N	C	T	N	T	C	T	T	T	C	N	T	N	T	N	T	C	T	N	T	C	C	T	T	C	T	T
3439	3439	M3439	SCSC-1_GI_9_1=S	G/A	3	CSC-1_GI_9_1=SCAFFOLD_1977=GI_9_2	7275639	+	N	A	N	A	G	G	A	N	A	A	A	N	G	N	N	A	G	N	G	A	G	G	G	A	A	G	N	G	N	G	A	G	N	G	A	A	G	R	A	G	G
3443	3443	M3443	SCSC-1_GI_9_1=S	A/G	3	CSC-1_GI_9_1=SCAFFOLD_1977=GI_9_2	7321342	+	G	G	N	G	A	A	G	N	G	G	G	N	A	N	N	G	A	N	A	G	A	A	A	G	G	G	N	A	N	A	G	A	N	A	G	G	A	R	G	A	A
3444	3444	M3444	SCSC-1_GI_9_1=S	C/A	3	CSC-1_GI_9_1=SCAFFOLD_1977=GI_9_2	7426064	+	N	A	N	A	C	C	A	N	A	A	A	N	C	N	N	A	C	N	C	A	C	C	C	A	N	A	N	C	N	C	A	C	N	C	A	A	C	M	A	C	C
3446	3446	M3446	SCSC-1_GI_9_1=S	T/C	3	CSC-1_GI_9_1=SCAFFOLD_1977=GI_9_2	7451374	+	N	C	N	C	T	T	C	N	C	C	C	N	T	N	N	C	T	N	T	C	T	T	T	C	N	C	N	T	N	T	C	T	N	T	C	Y	T	Y	C	T	T
3447	3447	M3447	SCSC-1_GI_9_1=S	A/T	3	CSC-1_GI_9_1=SCAFFOLD_1977=GI_9_2	7528939	+	N	T	N	T	A	A	T	N	T	T	T	N	A	N	N	T	A	N	A	T	A	A	A	T	T	T	N	A	N	A	T	A	N	A	T	W	A	W	T	A	A
3448	3448	M3448	SCSC-1_GI_9_1=S	A/T	3	CSC-1_GI_9_1=SCAFFOLD_1977=GI_9_2	7554568	+	N	T	N	T	A	A	T	N	T	T	T	N	A	N	N	T	A	N	A	T	A	A	A	T	N	T	N	A	N	A	T	A	N	A	T	W	A	W	T	T	A
3449	3449	M3449	SCSC-1_GI_9_1=S	A/G	3	CSC-1_GI_9_1=SCAFFOLD_1977=GI_9_2	7604458	+	N	G	N	G	A	A	G	N	G	G	G	N	A	N	N	G	A	N	A	G	A	A	A	G	N	A	N	A	N	A	G	A	N	A	G	A	A	R	A	G	A
3450	3450	M3450	SCSC-1_GI_9_1=S	A/C	3	CSC-1_GI_9_1=SCAFFOLD_1977=GI_9_2	7701678	+	C	C	N	C	A	A	C	N	C	C	C	N	A	N	N	C	A	N	A	C	A	A	A	C	C	A	N	A	N	A	C	A	N	A	C	A	A	M	A	C	A
3451	3451	M3451	SCSC-1_GI_9_1=S	T/C	3	CSC-1_GI_9_1=SCAFFOLD_1977=GI_9_2	7719556	+	N	C	N	C	T	T	C	N	C	C	C	N	T	N	N	C	T	N	T	C	T	T	T	C	C	T	N	T	N	T	C	T	N	T	C	T	T	Y	T	C	T
3452	3452	M3452	SCSC-1_GI_9_1=S	A/G	3	CSC-1_GI_9_1=SCAFFOLD_1977=GI_9_2	7733098	+	N	G	N	G	A	A	G	N	G	G	G	N	A	N	N	G	A	N	A	G	A	A	A	G	G	A	N	A	N	A	G	A	N	A	G	A	R	R	A	G	A
3453	3453	M3453	SCSC-1_GI_9_1=S	C/G	3	CSC-1_GI_9_1=SCAFFOLD_1977=GI_9_2	7733797	+	G	G	N	G	C	C	G	N	G	G	G	N	C	N	N	G	C	N	C	G	C	C	C	G	G	C	N	C	N	C	G	C	N	C	G	C	C	S	C	G	C
3454	3454	M3454	SCSC-1_GI_9_1=S	C/A	3	CSC-1_GI_9_1=SCAFFOLD_1977=GI_9_2	7771123	+	N	A	N	A	C	C	A	N	A	A	A	N	C	N	N	A	C	N	C	A	C	C	C	A	N	C	N	C	N	C	A	C	N	C	A	C	C	M	C	A	C
3455	3455	M3455	SCSC-1_GI_9_1=S	T/C	3	CSC-1_GI_9_1=SCAFFOLD_1977=GI_9_2	7803271	+	N	C	N	C	T	T	C	N	C	C	C	N	T	N	N	C	T	N	T	C	T	T	T	C	N	T	N	C	N	T	C	T	N	T	C	T	T	Y	T	C	T
3456	3456	M3456	SCSC-1_GI_9_1=S	T/C	3	CSC-1_GI_9_1=SCAFFOLD_1977=GI_9_2	7803276	+	N	C	N	C	T	T	C	N	C	C	C	N	T	N	N	C	T	N	T	C	T	T	T	C	N	T	N	C	N	T	C	T	N	T	C	T	T	Y	T	C	T
3457	3457	M3457	SCSC-1_GI_9_1=S	G/A	3	CSC-1_GI_9_1=SCAFFOLD_1977=GI_9_2	7803280	+	N	A	N	A	G	G	A	N	A	A	A	N	G	N	N	A	G	N	G	A	G	G	G	A	N	G	N	A	N	G	A	G	N	G	A	G	G	R	G	A	G
3458	3458	M3458	SCSC-1_GI_9_1=S	G/A	3	CSC-1_GI_9_1=SCAFFOLD_1977=GI_9_2	7855425	+	A	A	N	A	G	G	A	N	A	A	A	N	G	N	N	A	G	N	G	A	G	G	G	A	N	G	N	A	N	G	A	G	N	G	A	G	G	R	G	A	G
3460	3460	M3460	SCSC-1_GI_9_1=S	C/A	3	CSC-1_GI_9_1=SCAFFOLD_1977=GI_9_2	7917362	+	N	A	N	A	C	C	A	N	A	A	A	N	C	N	N	A	C	N	C	A	C	C	C	A	N	C	N	A	N	C	A	C	N	A	A	C	C	M	C	A	C
3464	3464	M3464	SCSC-1_GI_9_1=S	A/C	3	CSC-1_GI_9_1=SCAFFOLD_1977=GI_9_2	8021779	+	N	C	N	C	A	A	C	N	C	A	C	N	A	N	N	C	A	N	A	C	A	A	A	C	A	A	N	C	N	A	C	A	N	C	C	A	A	C	A	C	A
3465	3465	M3465	SCSC-1_GI_9_1=S	A/T	3	CSC-1_GI_9_1=SCAFFOLD_1977=GI_9_2	8021789	+	N	T	N	T	A	A	T	N	T	A	T	N	A	N	N	T	A	N	A	T	A	A	A	T	A	A	N	T	N	A	T	A	N	T	T	A	A	T	A	T	A
3466	3466	M3466	SCSC-1_GI_9_1=S	A/T	3	CSC-1_GI_9_1=SCAFFOLD_1977=GI_9_2	8021798	+	N	T	N	T	A	A	T	N	T	A	T	N	A	N	N	T	A	N	A	T	A	A	A	T	A	A	N	T	N	A	T	A	N	T	T	A	A	T	A	T	A
3467	3467	M3467	SCSC-1_GI_9_1=S	A/C	3	CSC-1_GI_9_1=SCAFFOLD_1977=GI_9_2	8072845	+	N	C	N	C	A	A	C	N	C	A	C	N	A	N	N	C	A	N	C	C	A	A	A	C	A	A	N	C	N	A	C	A	N	C	C	A	A	C	A	C	A
3468	3468	M3468	SCSC-1_GI_9_1=S	C/T	3	CSC-1_GI_9_1=SCAFFOLD_1977=GI_9_2	8072874	+	N	T	N	T	C	C	T	N	T	C	T	N	C	N	N	T	C	N	T	T	C	C	C	T	C	C	N	T	N	C	T	C	N	T	T	C	C	T	C	T	C
3470	3470	M3470	SCSC-1_GI_9_1=S	A/T	3	CSC-1_GI_9_1=SCAFFOLD_1977=GI_9_2	8119079	+	T	T	N	T	A	A	T	N	T	A	T	N	A	N	N	T	A	N	T	T	A	A	A	T	N	A	N	T	N	A	T	A	N	T	T	A	A	T	A	T	A
3478	3478	M3478	SCSC-1_GI_9_1=S	A/T	3	CSC-1_GI_9_1=SCAFFOLD_1977=GI_9_2	8192339	+	N	T	N	T	A	A	T	N	T	A	T	N	A	N	N	T	A	N	T	A	A	A	A	T	N	A	N	T	N	A	T	A	N	T	T	A	A	T	A	T	A
3479	3479	M3479	SCSC-1_GI_9_1=S	T/A	3	CSC-1_GI_9_1=SCAFFOLD_1977=GI_9_2	8192432	+	N	A	N	A	T	T	A	N	A	T	A	N	T	N	N	A	T	N	A	T	T	T	T	A	T	T	N	A	N	T	A	T	N	A	A	T	T	A	T	A	T
3480	3480	M3480	SCSC-1_GI_9_1=S	C/T	3	CSC-1_GI_9_1=SCAFFOLD_1977=GI_9_2	8194994	+	N	T	N	T	C	C	T	N	T	C	T	N	C	N	N	T	C	N	T	C	C	C	C	T	N	C	N	T	N	C	T	C	N	T	T	C	C	T	C	T	C
3481	3481	M3481	SCSC-1_GI_9_1=S	A/G	3	CSC-1_GI_9_1=SCAFFOLD_1977=GI_9_2	8268542	+	N	G	N	G	A	R	G	N	G	A	G	N	A	N	N	G	A	N	G	A	A	A	A	G	N	A	N	G	N	A	G	A	N	G	G	A	A	G	A	G	A
3482	3482	M3482	SCSC-1_GI_9_1=S	A/T	3	CSC-1_GI_9_1=SCAFFOLD_1977=GI_9_2	8281274	+	N	T	N	T	A	A	T	N	T	A	T	N	A	N	N	T	A	N	T	A	A	A	A	T	A	A	N	T	N	A	T	A	N	T	T	A	A	T	A	T	A
3485	3485	M3485	SCSC-1_GI_9_1=S	G/A	3	CSC-1_GI_9_1=SCAFFOLD_1977=GI_9_2	8290459	+	N	A	N	A	G	G	A	N	A	G	A	N	G	N	N	A	G	N	A	G	G	G	G	A	N	G	N	A	N	G	A	G	N	A	A	G	G	A	G	A	G
3486	3486	M3486	SCSC-1_GI_9_1=S	G/A	3	CSC-1_GI_9_1=SCAFFOLD_1977=GI_9_2	8307702	+	N	A	N	A	G	G	A	N	A	G	A	N	G	N	N	A	G	N	A	G	G	G	G	A	N	G	N	A	N	G	A	G	N	A	A	G	G	A	G	A	G
3487	3487	M3487	SCSC-1_GI_9_1=S	T/C	3	CSC-1_GI_9_1=SCAFFOLD_1977=GI_9_2	8313194	+	N	C	C	C	T	T	C	N	C	T	C	N	T	N	N	C	T	N	C	T	T	T	T	C	T	T	N	C	N	T	C	T	N	C	C	T	T	C	N	C	T
3488	3488	M3488	SCSC-1_GI_9_1=S	C/T	3	CSC-1_GI_9_1=SCAFFOLD_1977=GI_9_2	8313197	+	N	T	T	T	C	C	T	N	T	C	T	N	C	N	N	T	C	N	T	C	C	C	C	T	C	C	N	T	N	C	T	C	N	T	T	C	C	T	N	T	C
3490	3490	M3490	SCSC-1_GI_9_1=S	G/T	3	CSC-1_GI_9_1=SCAFFOLD_1977=GI_9_2	8366843	+	N	T	N	T	G	G	T	N	T	G	T	N	G	N	N	T	G	N	T	G	G	G	G	T	G	G	N	T	N	G	T	T	N	T	T	G	G	T	G	T	G
3491	3491	M3491	SCSC-1_GI_9_1=S	C/A	3	CSC-1_GI_9_1=SCAFFOLD_1977=GI_9_2	8419343	+	N	C	N	A	C	C	A	N	A	C	A	N	C	N	N	A	C	N	A	C	C	C	C	A	C	C	N	A	N	C	A	A	N	A	A	C	C	A	C	A	C
3492	3492	M3492	SCSC-1_GI_9_1=S	T/C	3	CSC-1_GI_9_1=SCAFFOLD_1977=GI_9_2	8419424	+	N	T	N	C	T	T	C	N	C	T	C	N	T	N	N	C	T	N	C	T	T	T	T	C	N	T	N	C	N	T	C	C	N	C	C	T	T	C	T	C	T
3493	3493	M3493	SCSC-1_GI_9_1=S	G/C	3	CSC-1_GI_9_1=SCAFFOLD_1977=GI_9_2	8419428	+	N	G	N	C	G	G	C	N	C	G	C	N	G	N	N	C	G	N	C	G	G	G	G	C	N	G	N	C	N	G	C	C	N	C	C	G	G	C	G	C	G
3494	3494	M3494	SCSC-1_GI_9_1=S	C/A	3	CSC-1_GI_9_1=SCAFFOLD_1977=GI_9_2	8419438	+	N	C	N	A	C	C	A	N	A	C	A	N	C	N	N	A	C	N	A	C	C	C	C	A	N	C	N	A	N	C	A	A	N	A	A	C	C	A	C	A	C
3495	3495	M3495	SCSC-1_GI_9_1=S	T/C	3	CSC-1_GI_9_1=SCAFFOLD_1977=GI_9_2	8419441	+	N	T	N	C	T	T	C	N	C	T	C	N	T	N	N	C	T	N	C	T	T	T	T	C	N	T	N	C	N	T	C	C	N	C	C	T	T	C	T	C	T
3497	3497	M3497	SCSC-1_GI_9_1=S	A/G	3	CSC-1_GI_9_1=SCAFFOLD_1977=GI_9_2	8484468	+	N	A	N	G	A	A	G	N	G	A	G	N	A	A	N	G	A	N	G	A	A	A	A	G	A	A	N	G	N	A	G	G	N	G	G	A	G	G	A	G	A
3498	3498	M3498	SCSC-1_GI_9_1=S	A/G	3	CSC-1_GI_9_1=SCAFFOLD_1977=GI_9_2	8486328	+	A	A	N	G	A	A	G	N	G	A	G	N	A	N	N	G	A	N	G	A	A	A	A	G	A	A	N	G	N	A	G	G	N	G	G	A	G	G	A	G	A
3499	3499	M3499	SCSC-1_GI_9_1=S	C/T	3	CSC-1_GI_9_1=SCAFFOLD_1977=GI_9_2	8516577	+	N	C	N	T	C	C	T	N	T	Y	T	N	C	N	N	T	C	N	T	C	C	C	C	T	N	C	N	T	N	C	T	T	N	T	T	C	T	T	C	T	C
3502	3502	M3502	SCSC-1_GI_9_1=S	A/G	3	CSC-1_GI_9_1=SCAFFOLD_1977=GI_9_2	8615859	+	N	A	N	G	A	A	G	N	G	R	G	N	A	N	N	G	A	N	G	A	A	A	G	G	N	A	N	G	N	A	G	G	N	G	G	A	G	G	A	G	A
3510	3510	M3510	SCSC-1_GI_9_1=S	A/T	3	CSC-1_GI_9_1=SCAFFOLD_1977=GI_9_2	8929860	+	N	A	T	T	A	A	A	N	T	T	T	N	A	N	N	T	A	N	T	A	A	A	T	T	N	A	N	T	N	A	T	T	N	T	T	A	A	T	A	T	A
3511	3511	M3511	SCSC-1_GI_9_1=S	T/C	3	CSC-1_GI_9_1=SCAFFOLD_1977=GI_9_2	8981084	+	N	T	N	C	T	T	T	N	C	C	C	N	T	N	N	C	T	N	C	T	T	T	C	C	N	C	N	C	N	T	C	C	N	C	C	T	T	C	T	C	T
3514	3514	M3514	SCSC-1_GI_9_1=S	A/G	3	CSC-1_GI_9_1=SCAFFOLD_1977=GI_9_2	9003627	+	N	A	N	G	A	A	A	N	G	R	G	N	A	N	N	G	A	N	G	A	A	A	G	G	N	G	N	G	N	A	G	G	N	G	G	A	A	G	A	G	A
3515	3515	M3515	SCSC-1_GI_9_1=S	C/G	3	CSC-1_GI_9_1=SCAFFOLD_1977=GI_9_2	9053694	+	N	C	N	G	C	C	C	N	G	S	G	N	C	N	N	G	C	N	G	C	C	C	G	G	N	G	N	G	N	C	G	G	N	G	G	C	C	G	C	G	C
3516	3516	M3516	SCSC-1_GI_9_1=S	G/A	3	CSC-1_GI_9_1=SCAFFOLD_1977=GI_9_2	9054694	+	N	G	N	A	G	G	G	N	A	R	A	N	G	N	N	A	G	N	A	G	G	G	A	A	N	A	N	A	N	G	A	A	N	A	A	G	G	A	G	A	G
3517	3517	M3517	SCSC-1_GI_9_1=S	A/G	3	CSC-1_GI_9_1=SCAFFOLD_1977=GI_9_2	9054720	+	N	A	N	G	A	A	A	N	G	R	G	N	A	N	N	G	A	N	G	A	A	A	G	G	N	G	N	G	N	A	G	G	N	G	G	A	A	G	A	G	A
3518	3518	M3518	SCSC-1_GI_9_1=S	T/C	3	CSC-1_GI_9_1=SCAFFOLD_1977=GI_9_2	9058171	+	N	T	C	C	T	T	T	N	C	Y	C	N	T	N	N	C	N	N	C	T	T	T	C	C	N	C	N	C	N	T	C	C	N	C	C	T	T	C	T	C	T
3519	3519	M3519	SCSC-1_GI_9_1=S	A/G	3	CSC-1_GI_9_1=SCAFFOLD_1977=GI_9_2	9058202	+	N	A	G	G	A	A	A	N	G	R	G	N	A	N	N	G	N	N	G	A	A	A	G	G	N	G	N	G	N	A	G	G	N	G	G	A	A	G	A	G	A
3520	3520	M3520	SCSC-1_GI_9_1=S	T/C	3	CSC-1_GI_9_1=SCAFFOLD_1977=GI_9_2	9121719	+	N	T	N	C	T	T	T	N	C	C	C	N	T	N	N	C	T	N	C	T	T	T	C	C	N	C	N	C	N	T	C	C	N	C	T	T	T	C	T	C	T
3521	3521	M3521	SCSC-1_GI_9_1=S	C/T	3	CSC-1_GI_9_1=SCAFFOLD_1977=GI_9_2	9121727	+	N	C	N	T	C	C	C	N	T	T	T	N	C	N	N	T	C	N	T	C	C	C	T	T	N	T	N	T	N	C	T	T	N	T	C	C	C	T	C	T	C
3522	3522	M3522	SCSC-1_GI_9_1=S	A/T	3	CSC-1_GI_9_1=SCAFFOLD_1977=GI_9_2	9137612	+	N	A	N	T	A	A	A	N	T	W	T	N	A	N	N	T	A	N	T	A	A	A	T	T	N	T	N	T	N	A	T	T	N	T	A	A	A	T	A	T	A
3523	3523	M3523	SCSC-1_GI_9_1=S	A/G	3	CSC-1_GI_9_1=SCAFFOLD_1977=GI_9_2	9137755	+	N	A	N	G	A	A	A	N	G	R	G	N	A	N	N	G	A	N	G	A	A	A	G	G	A	G	N	G	N	A	G	G	N	G	A	A	A	G	A	G	A
3524	3524	M3524	SCSC-1_GI_9_1=S	T/G	3	CSC-1_GI_9_1=SCAFFOLD_1977=GI_9_2	9142640	+	N	T	N	G	T	T	T	N	G	N	G	N	T	N	N	G	T	N	G	T	T	T	G	G	N	G	N	G	N	T	G	G	N	G	T	T	T	G	T	G	T
3525	3525	M3525	SCSC-1_GI_9_1=S	A/C	3	CSC-1_GI_9_1=SCAFFOLD_1977=GI_9_2	9142665	+	N	A	N	C	A	A	A	N	C	N	C	N	A	N	N	C	A	N	C	A	A	A	C	C	N	C	N	C	N	A	C	C	N	C	A	A	A	C	A	C	A
3526	3526	M3526	SCSC-1_GI_9_1=S	G/C	3	CSC-1_GI_9_1=SCAFFOLD_1977=GI_9_2	9142672	+	N	G	N	C	G	G	G	N	C	N	C	N	G	N	N	C	G	N	C	G	G	G	C	C	N	C	N	C	N	G	C	C	N	C	G	G	G	C	G	C	G
3527	3527	M3527	SCSC-1_GI_9_1=S	C/G	3	CSC-1_GI_9_1=SCAFFOLD_1977=GI_9_2	9142882	+	N	C	N	G	C	C	C	N	G	S	G	N	C	N	N	G	C	N	G	C	C	C	G	G	N	G	N	G	N	C	G	G	N	G	C	C	C	G	C	G	C
3528	3528	M3528	SCSC-1_GI_9_1=S	G/A	3	CSC-1_GI_9_1=SCAFFOLD_1977=GI_9_2	9145614	+	N	G	N	A	G	G	G	N	A	R	A	N	G	N	N	A	G	N	A	G	G	G	A	A	G	A	N	A	N	G	A	A	N	A	G	G	G	A	G	A	G
3529	3529	M3529	SCSC-1_GI_9_1=S	C/T	3	CSC-1_GI_9_1=SCAFFOLD_1977=GI_9_2	9145616	+	N	C	N	T	C	C	C	N	T	Y	T	N	C	N	N	T	C	N	T	C	C	C	T	T	C	T	N	T	N	C	T	T	N	T	C	C	C	T	C	T	C
3532	3532	M3532	SCSC-1_GI_9_1=S	G/T	3	CSC-1_GI_9_1=SCAFFOLD_1977=GI_9_2	9204793	+	N	G	N	T	G	G	G	N	T	G	T	N	G	N	N	T	G	N	T	G	G	T	T	T	G	T	N	T	N	G	G	T	N	T	G	G	T	T	G	T	G
3533	3533	M3533	SCSC-1_GI_9_1=S	A/C	3	CSC-1_GI_9_1=SCAFFOLD_1977=GI_9_2	9235055	+	N	A	N	C	A	A	A	N	C	A	C	N	A	N	N	C	A	N	C	A	A	C	C	C	A	C	N	C	N	A	A	C	A	C	A	A	C	C	A	C	A
3540	3540	M3540	SCSC-1_GI_9_1=S	G/C	3	CSC-1_GI_9_1=SCAFFOLD_1977=GI_9_2	9309386	+	N	G	N	C	G	G	G	N	C	G	C	N	G	N	N	C	G	N	C	G	G	C	C	C	G	C	N	C	N	G	G	C	N	C	G	G	C	C	G	C	G
3541	3541	M3541	SCSC-1_GI_9_1=S	C/T	3	CSC-1_GI_9_1=SCAFFOLD_1977=GI_9_2	9323544	+	C	T	N	T	C	C	C	N	T	C	T	N	C	N	N	T	C	N	T	C	C	T	T	T	C	T	N	T	N	C	C	T	N	T	C	C	T	T	C	T	C
3542	3542	M3542	SCSC-1_GI_9_1=S	A/G	3	CSC-1_GI_9_1=SCAFFOLD_1977=GI_9_2	9331677	+	A	G	N	G	A	A	A	N	G	A	G	N	A	N	N	G	A	N	G	A	A	G	G	G	N	G	N	G	N	A	A	G	N	G	A	A	G	G	A	G	A
3543	3543	M3543	SCSC-1_GI_9_1=S	G/C	3	CSC-1_GI_9_1=SCAFFOLD_1977=GI_9_2	9349809	+	N	C	N	C	G	G	G	N	C	G	C	N	G	N	N	C	G	N	C	G	G	C	C	C	G	C	N	C	N	G	G	C	N	C	C	G	C	S	G	C	G
3544	3544	M3544	SCSC-1_GI_9_1=S	T/G	3	CSC-1_GI_9_1=SCAFFOLD_1977=GI_9_2	9352429	+	N	G	N	G	T	T	T	N	G	T	G	N	T	N	N	G	T	N	G	T	T	G	G	G	T	G	N	G	N	T	T	G	N	G	G	T	G	K	T	G	T
3545	3545	M3545	SCSC-1_GI_9_1=S	A/T	3	CSC-1_GI_9_1=SCAFFOLD_1977=GI_9_2	9367736	+	N	T	N	T	A	A	A	N	T	A	T	N	A	N	N	T	A	N	T	A	A	T	T	T	A	T	N	T	N	A	A	T	N	T	T	A	T	W	A	T	A
3546	3546	M3546	SCSC-1_GI_9_1=S	C/T	3	CSC-1_GI_9_1=SCAFFOLD_1977=GI_9_2	9367737	+	N	T	N	T	C	C	C	N	T	C	T	N	C	N	N	T	C	N	T	C	C	T	T	T	C	T	N	T	N	C	C	T	N	T	T	C	T	Y	C	T	C
3547	3547	M3547	SCSC-1_GI_9_1=S	G/T	3	CSC-1_GI_9_1=SCAFFOLD_1977=GI_9_2	9367738	+	N	T	N	T	G	G	G	N	T	G	T	N	G	N	N	T	G	N	T	G	G	T	T	T	G	T	N	T	N	G	G	T	N	T	T	G	T	K	G	T	G
3548	3548	M3548	SCSC-1_GI_9_1=S	A/C	3	CSC-1_GI_9_1=SCAFFOLD_1977=GI_9_2	9367739	+	N	C	N	C	A	A	A	N	C	A	C	N	A	N	N	C	A	N	C	A	A	C	C	C	A	C	N	C	N	A	A	C	N	C	C	A	C	M	A	C	A
3549	3549	M3549	SCSC-1_GI_9_1=S	C/G	3	CSC-1_GI_9_1=SCAFFOLD_1977=GI_9_2	9368057	+	N	G	N	G	C	C	C	N	G	C	G	N	C	N	N	G	C	N	G	C	C	G	G	G	N	G	N	G	N	C	C	G	N	G	G	C	G	S	C	G	C
3550	3550	M3550	SCSC-1_GI_9_1=S	G/A	3	CSC-1_GI_9_1=SCAFFOLD_1977=GI_9_2	9368362	+	N	A	N	A	G	G	G	N	A	G	A	N	G	N	N	A	G	N	A	G	G	A	A	A	G	A	N	A	N	G	G	A	N	A	A	G	A	R	G	A	G
3551	3551	M3551	SCSC-1_GI_9_1=S	G/C	3	CSC-1_GI_9_1=SCAFFOLD_1977=GI_9_2	9368388	+	N	C	N	C	G	G	G	N	C	G	C	N	G	N	N	C	G	N	C	G	G	C	C	C	G	C	N	C	N	G	G	C	N	C	C	G	C	S	G	C	G
3552	3552	M3552	SCSC-1_GI_9_1=S	A/G	3	CSC-1_GI_9_1=SCAFFOLD_1977=GI_9_2	9373751	+	N	G	N	G	A	A	A	N	G	A	G	N	A	N	N	G	A	N	G	A	A	G	G	G	N	G	N	G	N	A	A	G	N	G	G	A	G	R	A	G	A
3554	3554	M3554	SCSC-1_GI_9_1=S	A/G	3	CSC-1_GI_9_1=SCAFFOLD_1977=GI_9_2	9394291	+	N	G	N	G	A	A	A	N	G	R	G	N	A	N	N	G	A	N	G	A	A	G	G	G	A	G	N	G	N	A	A	G	N	G	G	A	G	R	A	G	A
3555	3555	M3555	SCSC-1_GI_9_1=S	A/G	3	CSC-1_GI_9_1=SCAFFOLD_1977=GI_9_2	9411691	+	N	G	N	G	A	A	A	N	G	R	G	N	A	N	N	G	A	N	G	A	A	G	G	G	A	G	N	G	N	A	A	G	N	G	G	A	G	R	A	G	A
3556	3556	M3556	SCSC-1_GI_9_1=S	C/T	3	CSC-1_GI_9_1=SCAFFOLD_1977=GI_9_2	9411697	+	N	T	N	T	C	C	C	N	T	Y	T	N	C	N	N	T	C	N	T	C	C	T	T	T	C	T	N	T	N	C	C	T	N	T	T	C	T	Y	C	T	C
3557	3557	M3557	SCSC-1_GI_9_1=S	A/G	3	CSC-1_GI_9_1=SCAFFOLD_1977=GI_9_2	9436736	+	N	G	N	G	A	A	A	N	G	R	G	N	A	N	N	G	A	N	G	A	A	G	G	G	A	G	N	G	N	A	A	G	N	R	G	A	G	R	A	G	A
3558	3558	M3558	SCSC-1_GI_9_1=S	C/A	3	CSC-1_GI_9_1=SCAFFOLD_1977=GI_9_2	9440295	+	N	A	N	A	C	C	C	N	A	M	A	N	C	N	N	A	C	N	A	C	C	A	A	A	C	A	N	A	N	C	C	A	N	A	A	C	A	M	C	A	C
3559	3559	M3559	SCSC-1_GI_9_1=S	C/T	3	CSC-1_GI_9_1=SCAFFOLD_1977=GI_9_2	9440479	+	N	T	N	T	C	C	C	N	T	Y	T	N	C	N	N	T	C	N	T	C	C	T	T	T	C	T	N	T	N	C	C	T	N	T	T	C	T	Y	C	T	C
3562	3562	M3562	SCSC-1_GI_9_1=S	T/C	3	CSC-1_GI_9_1=SCAFFOLD_1977=GI_9_2	9458028	+	N	C	N	C	T	T	T	N	C	Y	C	N	T	N	N	C	T	N	C	T	T	C	C	C	N	C	N	C	N	T	T	C	N	C	C	T	C	Y	T	C	T
3564	3564	M3564	SCSC-1_GI_9_1=S	G/A	3	CSC-1_GI_9_1=SCAFFOLD_1977=GI_9_2	9481549	+	N	A	N	A	G	G	G	N	A	A	A	N	G	N	N	A	G	N	A	G	G	A	A	A	N	A	N	A	N	G	G	A	N	A	A	G	A	R	G	A	G
3565	3565	M3565	SCSC-1_GI_9_1=S	C/T	3	CSC-1_GI_9_1=SCAFFOLD_1977=GI_9_2	9512366	+	N	C	N	C	T	T	T	N	C	Y	C	N	T	N	N	C	T	N	C	T	T	C	C	C	T	C	N	C	N	T	T	C	N	C	C	T	C	Y	T	C	T
3566	3566	M3566	SCSC-1_GI_9_1=S	A/C	3	CSC-1_GI_9_1=SCAFFOLD_1977=GI_9_2	9534020	+	N	A	N	A	C	C	C	N	A	M	A	N	C	N	N	A	C	N	A	C	C	A	A	A	N	A	N	A	N	C	C	A	N	A	A	C	A	M	C	A	C
3567	3567	M3567	SCSC-1_GI_9_1=S	C/T	3	CSC-1_GI_9_1=SCAFFOLD_1977=GI_9_2	9534024	+	N	C	N	C	T	T	T	N	C	Y	C	N	T	N	N	C	T	N	C	T	T	C	C	C	N	C	N	C	N	T	T	C	N	C	C	T	C	Y	T	C	T
3568	3568	M3568	SCSC-1_GI_9_1=S	A/G	3	CSC-1_GI_9_1=SCAFFOLD_1977=GI_9_2	9578302	+	N	A	N	A	G	G	G	N	A	R	A	N	G	N	N	A	G	N	A	G	G	A	A	A	N	A	N	A	N	G	G	A	N	N	A	G	A	R	G	A	G
3569	3569	M3569	SCSC-1_GI_9_1=S	C/G	3	CSC-1_GI_9_1=SCAFFOLD_1977=GI_9_2	9588908	+	N	C	N	C	G	G	G	N	C	S	C	N	G	N	N	C	C	N	C	G	G	C	C	C	G	C	N	C	N	G	G	C	N	C	C	G	C	S	G	C	G
3570	3570	M3570	SCSC-1_GI_9_1=S	A/G	3	CSC-1_GI_9_1=SCAFFOLD_1977=GI_9_2	9624607	+	N	A	N	A	G	G	G	N	A	R	A	N	G	N	N	A	A	N	A	G	G	A	A	A	G	A	N	A	N	G	G	A	N	A	A	G	A	R	G	A	G
3571	3571	M3571	SCSC-1_GI_9_1=S	T/C	3	CSC-1_GI_9_1=SCAFFOLD_1977=GI_9_2	9635297	+	N	T	N	C	C	C	C	N	T	T	T	N	C	N	N	T	T	N	T	C	C	T	T	T	N	T	N	T	N	C	C	T	N	T	T	C	T	Y	N	T	C
3572	3572	M3572	SCSC-1_GI_9_1=S	G/T	3	CSC-1_GI_9_1=SCAFFOLD_1977=GI_9_2	9655659	+	N	G	N	T	T	T	T	N	G	T	G	N	T	N	N	G	G	N	G	T	T	G	G	G	T	G	N	G	N	T	T	G	N	G	G	T	G	K	T	G	T
3573	3573	M3573	SCSC-1_GI_9_1=S	C/T	3	CSC-1_GI_9_1=SCAFFOLD_1977=GI_9_2	9656433	+	N	C	N	T	T	T	T	N	C	T	C	N	T	N	N	C	C	N	C	T	T	C	C	C	T	C	N	C	N	T	T	C	N	C	C	T	C	Y	T	C	T
3574	3574	M3574	SCSC-1_GI_9_1=S	A/G	3	CSC-1_GI_9_1=SCAFFOLD_1977=GI_9_2	9660167	+	N	A	N	G	G	G	G	N	A	G	A	N	G	N	N	A	A	N	A	G	G	A	A	A	G	A	N	A	N	G	G	A	N	A	A	G	A	R	G	A	G
3575	3575	M3575	SCSC-1_GI_9_1=S	A/C	3	CSC-1_GI_9_1=SCAFFOLD_1977=GI_9_2	9747598	+	N	A	N	C	C	C	C	N	A	A	A	N	C	N	N	A	N	N	A	C	C	A	A	A	N	A	N	A	N	C	C	A	N	A	A	C	A	A	C	A	C
3576	3576	M3576	SCSC-1_GI_9_1=S	A/T	3	CSC-1_GI_9_1=SCAFFOLD_1977=GI_9_2	9747963	+	N	A	N	T	T	T	T	N	A	A	A	N	T	N	N	A	A	N	A	T	T	A	A	A	T	A	N	A	N	T	T	A	N	A	A	T	A	A	T	A	T
3577	3577	M3577	SCSC-1_GI_9_1=S	G/T	3	CSC-1_GI_9_1=SCAFFOLD_1977=GI_9_2	9753862	+	T	G	N	T	T	T	T	N	G	G	G	N	T	N	N	G	G	N	G	T	T	G	G	G	T	G	N	G	N	T	T	G	N	G	G	T	G	G	T	G	T
3578	3578	M3578	SCSC-1_GI_9_1=S	C/T	3	CSC-1_GI_9_1=SCAFFOLD_1977=GI_9_2	9753884	+	T	C	N	T	T	T	T	N	C	C	C	N	T	N	N	C	C	N	C	T	T	C	C	C	T	C	N	C	N	T	T	C	N	C	C	T	C	C	T	C	T
3579	3579	M3579	SCSC-1_GI_9_1=S	T/A	3	CSC-1_GI_9_1=SCAFFOLD_1977=GI_9_2	9753923	+	N	T	N	A	A	A	A	N	T	T	T	N	A	N	N	T	T	N	T	A	A	T	T	T	A	T	N	T	N	A	A	T	N	T	T	A	T	T	A	T	A
3580	3580	M3580	SCSC-1_GI_9_1=S	T/C	3	CSC-1_GI_9_1=SCAFFOLD_1977=GI_9_2	9753964	+	C	T	N	C	C	C	C	N	T	T	T	N	C	N	N	T	T	N	T	C	C	T	T	T	N	T	N	T	N	C	C	T	N	T	T	C	T	T	C	T	C
3581	3581	M3581	SCSC-1_GI_9_1=S	G/A	3	CSC-1_GI_9_1=SCAFFOLD_1977=GI_9_2	9798290	+	N	G	N	A	A	A	A	N	G	G	G	N	A	N	N	G	G	N	G	A	A	G	G	G	A	G	N	G	N	A	A	G	N	G	G	A	G	G	A	G	A
3582	3582	M3582	SCSC-1_GI_9_1=S	T/G	3	CSC-1_GI_9_1=SCAFFOLD_1977=GI_9_2	9808960	+	N	T	N	G	G	G	G	N	T	T	T	N	G	N	N	T	T	N	T	G	G	T	T	T	G	T	N	T	N	G	G	T	N	T	T	G	T	T	G	T	G
3583	3583	M3583	SCSC-1_GI_9_1=S	C/T	3	CSC-1_GI_9_1=SCAFFOLD_1977=GI_9_2	9811038	+	N	C	N	T	T	T	T	N	C	C	C	N	T	N	N	C	C	N	C	T	T	C	C	C	T	C	N	C	N	T	T	C	N	C	C	T	C	C	T	C	T
3584	3584	M3584	SCSC-1_GI_9_1=S	T/A	3	CSC-1_GI_9_1=SCAFFOLD_1977=GI_9_2	9884734	+	N	T	N	A	A	A	A	N	T	T	T	N	A	N	N	T	A	N	T	A	A	T	T	T	N	T	N	T	N	A	A	T	N	T	T	A	T	T	A	A	A
3585	3585	M3585	SCSC-1_GI_9_1=S	C/T	3	CSC-1_GI_9_1=SCAFFOLD_1977=GI_9_2	9940799	+	N	C	N	T	T	T	T	N	C	C	C	N	T	N	N	C	T	N	C	T	T	C	C	C	T	C	C	C	N	T	T	C	T	C	C	T	C	C	T	T	T
3586	3586	M3586	SCSC-1_GI_9_1=S	T/G	3	CSC-1_GI_9_1=SCAFFOLD_1977=GI_9_2	9979830	+	N	T	N	G	G	G	G	N	T	T	T	N	G	N	N	T	G	N	T	G	G	T	T	T	G	T	N	T	N	G	G	T	N	T	T	G	T	T	G	G	G
3587	3587	M3587	SCSC-1_GI_9_1=S	C/T	3	CSC-1_GI_9_1=SCAFFOLD_1977=GI_9_2	9979877	+	T	C	N	T	T	T	T	N	C	C	C	N	T	N	N	C	T	N	C	T	T	C	C	C	N	C	N	C	N	T	T	C	N	C	C	T	C	C	T	T	T
3588	3588	M3588	SCSC-1_GI_9_1=S	G/A	3	CSC-1_GI_9_1=SCAFFOLD_1977=GI_9_2	9979896	+	A	G	N	A	A	A	A	N	G	G	G	N	A	N	N	G	A	N	G	A	A	G	G	G	N	G	N	G	N	A	A	G	N	G	G	A	G	G	A	A	A
3589	3589	M3589	SCSC-1_GI_9_1=S	T/C	3	CSC-1_GI_9_1=SCAFFOLD_1977=GI_9_2	9979897	+	C	T	N	C	C	C	C	N	T	T	T	N	C	N	N	T	C	N	T	C	C	T	T	T	N	T	N	T	N	C	C	T	N	T	T	C	T	T	C	C	C
3590	3590	M3590	SCSC-1_GI_9_1=S	T/A	3	CSC-1_GI_9_1=SCAFFOLD_1977=GI_9_2	10037481	+	N	T	N	A	A	A	A	N	T	T	A	N	A	N	N	T	A	N	T	A	A	T	T	T	A	T	N	T	N	A	A	T	N	T	T	A	T	T	A	T	A
3591	3591	M3591	SCSC-1_GI_9_1=S	G/A	3	CSC-1_GI_9_1=SCAFFOLD_1977=GI_9_2	10085896	+	N	G	N	A	A	A	A	N	G	G	A	N	A	N	N	G	R	N	G	A	A	G	G	G	A	G	N	G	N	A	A	G	N	G	G	A	G	G	A	G	A
3592	3592	M3592	SCSC-1_GI_9_1=S	C/T	3	CSC-1_GI_9_1=SCAFFOLD_1977=GI_9_2	10102716	+	N	C	N	T	T	T	T	N	C	C	T	N	T	N	N	C	T	N	C	T	T	C	C	C	T	C	N	C	N	T	T	C	N	C	C	T	C	C	T	C	T
3593	3593	M3593	SCSC-1_GI_9_1=S	A/G	3	CSC-1_GI_9_1=SCAFFOLD_1977=GI_9_2	10304777	+	N	A	N	G	G	G	G	N	A	A	G	N	G	N	N	A	G	N	A	G	G	A	A	A	N	A	N	A	N	G	G	A	N	A	A	A	A	A	G	A	G
3594	3594	M3594	SCSC-1_GI_9_1=S	A/G	3	CSC-1_GI_9_1=SCAFFOLD_1977=GI_9_2	10304814	+	N	G	N	A	A	A	A	N	G	G	A	N	A	N	N	G	A	N	G	A	A	G	G	G	N	G	N	G	N	A	A	G	N	G	G	G	G	G	A	G	A
3595	3595	M3595	SCSC-1_GI_9_1=S	G/C	3	CSC-1_GI_9_1=SCAFFOLD_1977=GI_9_2	10310140	+	N	G	N	C	C	C	C	N	G	G	C	N	C	N	N	G	C	N	G	C	C	G	G	G	C	G	N	G	N	C	C	G	N	G	G	G	G	G	C	G	C
3596	3596	M3596	SCSC-1_GI_9_1=S	G/A	3	CSC-1_GI_9_1=SCAFFOLD_1977=GI_9_2	10310176	+	N	G	N	A	A	A	A	N	G	G	A	N	A	N	N	G	A	N	G	A	A	G	G	G	A	G	N	G	N	A	A	G	N	G	G	G	G	G	A	G	A
3597	3597	M3597	SCSC-1_GI_9_1=S	T/C	3	CSC-1_GI_9_1=SCAFFOLD_1977=GI_9_2	10310179	+	N	T	N	C	C	C	C	N	T	T	C	N	C	N	N	T	C	N	T	C	C	T	T	T	C	T	N	T	N	C	C	T	N	T	T	T	T	T	C	T	C
3598	3598	M3598	SCSC-1_GI_9_1=S	C/T	3	CSC-1_GI_9_1=SCAFFOLD_1977=GI_9_2	10317819	+	N	T	N	C	C	C	C	N	T	T	C	N	C	N	N	T	C	N	T	C	C	T	T	T	C	T	N	T	N	C	C	T	N	T	T	T	T	T	C	T	C
3600	3600	M3600	SCSC-1_GI_9_1=S	A/G	3	CSC-1_GI_9_1=SCAFFOLD_1977=GI_9_2	10326208	+	G	A	N	G	G	G	G	N	A	N	G	N	G	N	N	A	G	N	A	G	G	A	A	A	N	A	N	A	N	G	G	A	N	A	A	A	A	A	G	A	G
3601	3601	M3601	SCSC-1_GI_9_1=S	A/G	3	CSC-1_GI_9_1=SCAFFOLD_1977=GI_9_2	10326209	+	G	A	N	G	G	G	G	N	A	N	G	N	G	N	N	A	G	N	A	G	G	A	A	A	N	A	N	A	N	G	G	A	N	A	A	A	A	A	G	A	G
3602	3602	M3602	SCSC-1_GI_9_1=S	A/G	3	CSC-1_GI_9_1=SCAFFOLD_1977=GI_9_2	10329124	+	N	G	N	A	A	A	A	N	G	G	A	N	A	N	N	G	A	N	G	A	A	G	G	G	A	G	N	G	N	A	A	G	N	G	G	G	G	G	A	G	A
3603	3603	M3603	SCSC-1_GI_9_1=S	C/T	3	CSC-1_GI_9_1=SCAFFOLD_1977=GI_9_2	10339113	+	N	C	N	T	T	T	T	N	C	C	T	N	T	N	N	C	T	N	C	T	T	C	C	C	T	C	N	C	N	T	T	C	N	C	C	C	C	C	T	C	T
3604	3604	M3604	SCSC-1_GI_9_1=S	T/C	3	CSC-1_GI_9_1=SCAFFOLD_1977=GI_9_2	10339170	+	N	T	N	C	C	C	C	N	T	T	C	N	C	N	N	T	C	N	T	C	C	T	T	T	N	T	N	T	N	C	C	T	N	T	T	T	T	T	C	T	C
3605	3605	M3605	SCSC-1_GI_9_1=S	C/A	3	CSC-1_GI_9_1=SCAFFOLD_1977=GI_9_2	10339275	+	N	C	N	A	A	A	A	N	C	C	A	N	A	N	N	C	N	N	C	A	A	C	C	C	A	C	N	C	N	A	A	C	N	C	C	C	C	C	A	C	A
3606	3606	M3606	SCSC-1_GI_9_1=S	T/C	3	CSC-1_GI_9_1=SCAFFOLD_1977=GI_9_2	10339281	+	N	T	N	C	C	C	C	N	T	T	C	N	C	N	N	T	N	N	T	C	C	T	T	T	C	T	N	T	N	C	C	T	N	T	T	T	T	T	C	T	C
3607	3607	M3607	SCSC-1_GI_9_1=S	A/T	3	CSC-1_GI_9_1=SCAFFOLD_1977=GI_9_2	10339327	+	N	A	N	T	T	T	T	N	A	A	T	N	T	N	N	A	T	N	A	T	T	A	A	A	T	A	N	A	N	T	T	A	N	A	A	A	A	A	T	A	T
3608	3608	M3608	SCSC-1_GI_9_1=S	C/T	3	CSC-1_GI_9_1=SCAFFOLD_1977=GI_9_2	10339362	+	N	C	N	T	T	T	T	N	C	C	T	N	T	N	N	C	T	N	C	T	T	C	C	C	T	C	N	C	N	T	T	C	N	C	C	C	C	C	T	C	T
3613	3613	M3613	SCSC-1_GI_9_1=S	C/T	3	CSC-1_GI_9_1=SCAFFOLD_1977=GI_9_2	10342064	+	N	T	N	C	C	C	C	N	T	N	C	N	C	N	N	T	C	N	T	C	C	T	T	T	N	T	N	T	N	C	C	T	N	N	T	T	T	T	C	T	C
3614	3614	M3614	SCSC-1_GI_9_1=S	A/T	3	CSC-1_GI_9_1=SCAFFOLD_1977=GI_9_2	10342079	+	N	T	N	A	A	A	A	N	T	N	A	N	A	N	N	T	A	N	T	A	A	T	T	T	N	T	N	T	N	A	A	T	N	N	T	T	T	T	A	T	A
3615	3615	M3615	SCSC-1_GI_9_1=S	G/A	3	CSC-1_GI_9_1=SCAFFOLD_1977=GI_9_2	10342094	+	N	A	N	G	G	G	G	N	A	N	G	N	G	N	N	A	G	N	A	G	G	A	A	A	N	A	N	A	N	G	G	A	N	N	A	A	A	A	G	A	G
3616	3616	M3616	SCSC-1_GI_9_1=S	T/C	3	CSC-1_GI_9_1=SCAFFOLD_1977=GI_9_2	10342097	+	N	C	N	T	T	T	T	N	C	N	T	N	T	N	N	C	T	N	C	T	T	C	C	C	N	C	N	C	N	T	T	C	N	N	C	C	C	C	T	C	T
3617	3617	M3617	SCSC-1_GI_9_1=S	T/C	3	CSC-1_GI_9_1=SCAFFOLD_1977=GI_9_2	10345206	+	N	C	N	T	T	T	T	N	C	C	T	N	T	N	N	C	T	N	C	T	T	C	C	C	N	C	N	C	N	T	T	C	N	C	C	C	C	C	T	C	T
3618	3618	M3618	SCSC-1_GI_9_1=S	C/T	3	CSC-1_GI_9_1=SCAFFOLD_1977=GI_9_2	10345233	+	N	T	N	C	C	C	C	N	T	T	C	N	C	N	N	T	C	N	T	C	C	T	T	T	C	T	N	T	N	C	C	T	N	T	T	T	T	T	C	T	C
3619	3619	M3619	SCSC-1_GI_9_1=S	C/T	3	CSC-1_GI_9_1=SCAFFOLD_1977=GI_9_2	10345257	+	N	T	N	C	C	C	C	N	T	T	C	N	C	N	N	T	C	N	T	C	C	T	T	T	C	T	N	T	N	C	C	T	N	T	T	T	T	T	C	T	C
3620	3620	M3620	SCSC-1_GI_9_1=S	T/A	3	CSC-1_GI_9_1=SCAFFOLD_1977=GI_9_2	10371197	+	N	T	N	A	A	A	A	N	T	T	A	N	A	N	N	T	A	N	T	A	A	T	T	T	A	T	N	T	N	A	A	T	N	T	T	T	T	T	A	T	A
3621	3621	M3621	SCSC-1_GI_9_1=S	T/C	3	CSC-1_GI_9_1=SCAFFOLD_1977=GI_9_2	10441381	+	N	C	N	T	T	T	T	N	C	C	T	N	T	N	N	C	T	N	C	T	T	C	C	C	T	C	N	T	N	T	T	C	N	C	C	C	C	C	T	C	T
3622	3622	M3622	SCSC-1_GI_9_1=S	C/T	3	CSC-1_GI_9_1=SCAFFOLD_1977=GI_9_2	10495830	+	N	T	N	C	C	C	C	N	T	T	C	N	C	N	N	T	C	N	T	T	C	T	T	C	N	T	N	C	N	C	C	T	N	T	T	T	T	T	C	T	C
3623	3623	M3623	SCSC-1_GI_9_1=S	C/G	3	CSC-1_GI_9_1=SCAFFOLD_1977=GI_9_2	10495846	+	N	G	N	C	C	C	C	N	G	G	C	N	C	N	N	G	C	N	G	G	C	G	G	C	N	G	N	C	N	C	C	G	N	G	G	G	G	G	C	G	C
3624	3624	M3624	SCSC-1_GI_9_1=S	A/T	3	CSC-1_GI_9_1=SCAFFOLD_1977=GI_9_2	10495869	+	N	T	N	A	A	A	A	N	T	T	A	N	A	N	N	T	A	N	T	T	A	T	T	A	N	T	N	A	N	A	A	T	N	T	T	T	T	T	A	T	A
3625	3625	M3625	SCSC-1_GI_9_1=S	G/A	3	CSC-1_GI_9_1=SCAFFOLD_1977=GI_9_2	10499382	+	N	A	N	G	G	G	G	N	A	A	G	N	G	N	N	A	G	N	A	A	G	A	A	G	G	A	N	G	N	G	G	A	N	A	A	A	A	A	G	A	G
3626	3626	M3626	SCSC-1_GI_9_1=S	G/A	3	CSC-1_GI_9_1=SCAFFOLD_1977=GI_9_2	10499391	+	N	A	N	G	G	G	G	N	A	A	G	N	G	N	N	A	G	N	A	A	G	A	A	G	G	A	N	G	N	G	G	A	N	A	A	A	A	A	G	A	G
3627	3627	M3627	SCSC-1_GI_9_1=S	T/G	3	CSC-1_GI_9_1=SCAFFOLD_1977=GI_9_2	10499396	+	N	G	N	T	T	T	T	N	G	G	T	N	T	N	N	G	T	N	G	G	T	G	G	T	T	G	N	T	N	T	T	G	N	G	G	G	G	G	T	G	T
3628	3628	M3628	SCSC-1_GI_9_1=S	T/C	3	CSC-1_GI_9_1=SCAFFOLD_1977=GI_9_2	10499409	+	N	C	N	T	T	T	T	N	C	C	T	N	T	N	N	C	T	N	C	C	T	C	C	T	T	C	N	T	N	T	T	C	N	C	C	C	C	C	T	C	T
3629	3629	M3629	SCSC-1_GI_9_1=S	C/T	3	CSC-1_GI_9_1=SCAFFOLD_1977=GI_9_2	10561881	+	N	T	T	C	C	C	C	N	T	T	C	N	C	N	N	T	C	N	T	T	T	T	T	C	C	T	N	C	N	C	C	T	N	T	T	T	T	T	C	T	C
3630	3630	M3630	SCSC-1_GI_9_1=S	C/G	3	CSC-1_GI_9_1=SCAFFOLD_1977=GI_9_2	10561887	+	N	G	G	C	C	C	C	N	G	G	C	N	C	N	N	G	C	N	G	G	G	G	G	C	C	G	N	C	N	C	C	G	N	G	G	G	G	G	C	G	C
3631	3631	M3631	SCSC-1_GI_9_1=S	C/T	3	CSC-1_GI_9_1=SCAFFOLD_1977=GI_9_2	10576708	+	N	T	N	C	C	C	C	N	T	T	C	N	C	N	N	T	C	N	T	T	T	T	T	C	N	T	N	C	N	C	C	T	N	T	T	T	T	T	C	T	C
3632	3632	M3632	SCSC-1_GI_9_1=S	A/G	3	CSC-1_GI_9_1=SCAFFOLD_1977=GI_9_2	10576744	+	N	G	N	A	A	A	A	N	G	G	A	N	A	N	N	G	A	N	G	G	G	G	G	A	A	G	N	A	N	A	A	G	A	G	G	G	G	G	A	G	A
3633	3633	M3633	SCSC-1_GI_9_1=S	C/A	3	CSC-1_GI_9_1=SCAFFOLD_1977=GI_9_2	10577636	+	N	A	N	C	C	C	C	N	A	A	C	N	C	N	N	A	C	N	A	A	A	A	A	C	C	A	N	C	N	C	C	A	N	A	A	A	A	A	C	A	C
3634	3634	M3634	SCSC-1_GI_9_1=S	A/G	3	CSC-1_GI_9_1=SCAFFOLD_1977=GI_9_2	10579385	+	N	G	N	A	A	A	A	N	G	G	A	N	A	N	N	G	A	N	G	G	G	G	G	A	A	G	N	A	N	A	A	G	N	G	G	G	G	G	A	G	A
3635	3635	M3635	SCSC-1_GI_9_1=S	G/C	3	CSC-1_GI_9_1=SCAFFOLD_1977=GI_9_2	10579386	+	N	C	N	G	G	G	G	N	C	C	G	N	G	N	N	C	G	N	C	C	C	C	C	G	G	C	N	G	N	G	G	C	N	C	C	C	C	C	G	C	G
3636	3636	M3636	SCSC-1_GI_9_1=S	C/A	3	CSC-1_GI_9_1=SCAFFOLD_1977=GI_9_2	10579408	+	N	A	N	C	C	C	C	N	A	A	C	N	C	N	N	A	C	N	A	A	A	A	A	C	C	A	N	C	N	C	C	A	N	A	A	A	A	A	C	A	C
3637	3637	M3637	SCSC-1_GI_9_1=S	G/T	3	CSC-1_GI_9_1=SCAFFOLD_1977=GI_9_2	10587251	+	G	T	N	G	G	G	G	N	T	T	G	N	G	N	N	T	N	N	T	T	T	T	T	G	G	T	N	G	N	G	G	T	N	T	T	T	T	T	G	T	G
3638	3638	M3638	SCSC-1_GI_9_1=S	A/G	3	CSC-1_GI_9_1=SCAFFOLD_1977=GI_9_2	10593780	+	N	G	N	A	A	A	A	N	G	G	A	N	A	N	N	G	A	N	G	G	G	G	G	A	N	G	N	A	N	A	A	G	N	G	G	G	G	G	A	G	A
3639	3639	M3639	SCSC-1_GI_9_1=S	G/A	3	CSC-1_GI_9_1=SCAFFOLD_1977=GI_9_2	10685165	+	N	A	N	G	G	G	G	N	A	A	A	N	G	N	N	A	G	N	A	G	A	A	A	G	G	A	N	G	N	G	G	A	N	A	A	A	A	A	G	A	G
3640	3640	M3640	SCSC-1_GI_9_1=S	G/A	3	CSC-1_GI_9_1=SCAFFOLD_1977=GI_9_2	10692953	+	G	A	N	G	G	G	G	N	A	A	A	N	G	N	N	A	N	N	A	G	A	A	A	G	N	A	N	G	N	G	G	A	N	A	A	A	A	A	G	A	G
3645	3645	M3645	SCSC-1_GI_9_1=S	C/T	3	CSC-1_GI_9_1=SCAFFOLD_1977=GI_9_2	10707198	+	N	C	N	T	T	T	T	N	C	C	C	N	T	N	N	C	T	N	C	T	C	C	C	T	T	C	N	T	N	T	T	C	N	C	C	C	C	C	T	C	T
3648	3648	M3648	SCSC-1_GI_9_1=S	T/G	3	CSC-1_GI_9_1=SCAFFOLD_1977=GI_9_2	10775103	+	N	T	N	G	G	G	G	N	T	T	T	N	G	N	N	T	G	N	T	G	T	K	T	G	N	T	N	G	N	G	G	T	N	T	T	T	T	T	G	T	G
3649	3649	M3649	SCSC-1_GI_9_1=S	A/G	3	CSC-1_GI_9_1=SCAFFOLD_1977=GI_9_2	10775109	+	N	A	N	G	G	G	G	N	A	A	A	N	G	N	N	A	G	N	A	G	A	R	A	G	N	A	N	G	N	G	G	A	N	A	A	A	A	A	G	A	G
3653	3653	M3653	SCSC-1_GI_9_1=S	C/A	3	CSC-1_GI_9_1=SCAFFOLD_1977=GI_9_2	10813245	+	N	C	N	A	A	A	A	N	C	C	C	N	A	N	N	C	A	N	C	A	C	M	C	A	N	C	N	A	N	A	A	C	N	C	C	C	C	C	A	C	C
3655	3655	M3655	SCSC-1_GI_9_1=S	G/C	3	CSC-1_GI_9_1=SCAFFOLD_1977=GI_9_2	10939533	+	N	G	N	C	C	C	C	N	G	G	G	N	C	N	N	G	C	N	G	C	G	S	G	C	C	G	N	C	N	C	C	G	N	G	G	G	G	G	S	G	G
3656	3656	M3656	SCSC-1_GI_9_1=S	T/A	3	CSC-1_GI_9_1=SCAFFOLD_1977=GI_9_2	10947748	+	N	T	N	A	A	A	A	N	T	T	T	N	A	N	N	T	A	N	T	A	T	W	T	A	N	T	N	A	N	A	A	T	N	T	T	T	T	T	W	T	T
3657	3657	M3657	SCSC-1_GI_9_1=S	T/A	3	CSC-1_GI_9_1=SCAFFOLD_1977=GI_9_2	10947749	+	N	T	N	A	A	A	A	N	T	T	T	N	A	N	N	T	A	N	T	A	T	W	T	A	N	T	N	A	N	A	A	T	N	T	T	T	T	T	W	T	T
3658	3658	M3658	SCSC-1_GI_9_1=S	G/T	3	CSC-1_GI_9_1=SCAFFOLD_1977=GI_9_2	10947792	+	N	G	N	T	T	T	T	N	G	G	G	N	T	N	N	G	T	N	G	T	G	K	G	T	N	G	N	T	N	T	T	G	N	G	G	G	G	G	K	G	G
3659	3659	M3659	SCSC-1_GI_9_1=S	T/C	3	CSC-1_GI_9_1=SCAFFOLD_1977=GI_9_2	10952558	+	N	T	T	C	C	C	C	N	T	T	T	N	C	C	N	T	C	N	T	C	T	Y	T	C	C	T	N	C	N	C	C	T	N	T	T	T	T	T	Y	T	T
3660	3660	M3660	SCSC-1_GI_9_1=S	A/G	3	CSC-1_GI_9_1=SCAFFOLD_1977=GI_9_2	11010954	+	N	A	N	G	G	G	G	N	A	A	A	N	G	N	N	A	G	N	A	G	A	R	A	G	N	A	N	G	N	G	G	A	N	A	A	A	A	A	R	A	A
3661	3661	M3661	SCSC-1_GI_9_1=S	C/G	3	CSC-1_GI_9_1=SCAFFOLD_1977=GI_9_2	11010988	+	N	C	N	G	G	G	G	N	C	C	C	N	G	N	N	C	G	N	C	G	C	S	C	G	N	C	N	G	N	G	G	C	N	C	C	C	C	C	S	C	C
3662	3662	M3662	SCSC-1_GI_9_1=S	T/A	3	CSC-1_GI_9_1=SCAFFOLD_1977=GI_9_2	11010989	+	N	T	N	A	A	A	A	N	T	T	T	N	A	N	N	T	A	N	T	A	T	W	T	A	N	T	N	A	N	A	A	T	N	T	T	T	T	T	W	T	T
3663	3663	M3663	SCSC-1_GI_9_1=S	C/G	3	CSC-1_GI_9_1=SCAFFOLD_1977=GI_9_2	11046917	+	N	C	N	G	G	G	G	N	C	C	C	N	G	N	N	C	N	N	C	G	C	S	C	G	G	C	N	G	N	G	G	C	N	C	C	C	C	C	S	C	C
3664	3664	M3664	SCSC-1_GI_9_1=S	T/A	3	CSC-1_GI_9_1=SCAFFOLD_1977=GI_9_2	11137552	+	N	T	N	A	A	A	A	N	T	T	T	N	A	N	N	T	A	N	T	A	A	W	T	A	N	T	N	A	N	A	A	T	N	T	A	T	T	T	W	T	T
3667	3667	M3667	SCSC-1_GI_9_1=S	A/G	3	CSC-1_GI_9_1=SCAFFOLD_1977=GI_9_2	11249276	+	N	G	N	A	A	A	A	N	G	G	G	N	A	N	N	G	A	N	G	A	A	R	G	A	A	G	N	A	N	A	A	G	N	G	A	G	G	G	R	G	G
3668	3668	M3668	SCSC-1_GI_9_1=S	A/G	3	CSC-1_GI_9_1=SCAFFOLD_1977=GI_9_2	11249285	+	N	A	N	G	G	G	G	N	A	A	A	N	G	N	N	A	G	N	A	G	G	R	A	G	G	A	N	G	N	G	G	A	N	A	G	A	A	A	R	A	A
3669	3669	M3669	SCSC-1_GI_9_1=S	G/T	3	CSC-1_GI_9_1=SCAFFOLD_1977=GI_9_2	11249289	+	N	T	N	G	G	G	G	N	T	T	T	N	G	N	N	T	G	N	T	G	G	K	T	G	G	T	N	G	N	G	G	T	N	T	G	T	T	T	K	T	T
3670	3670	M3670	SCSC-1_GI_9_1=S	G/A	3	CSC-1_GI_9_1=SCAFFOLD_1977=GI_9_2	11252302	+	N	G	N	A	A	A	A	N	G	G	G	N	A	N	N	G	A	N	G	A	A	R	G	A	A	G	N	A	N	A	A	G	N	G	A	G	G	G	R	G	G
3671	3671	M3671	SCSC-1_GI_9_1=S	A/C	3	CSC-1_GI_9_1=SCAFFOLD_1977=GI_9_2	11348230	+	N	C	N	A	A	A	A	N	C	C	C	N	A	N	N	C	A	N	C	A	A	M	C	A	A	C	N	A	N	A	A	C	N	C	A	C	C	C	M	C	C
3672	3672	M3672	SCSC-1_GI_9_1=S	A/G	3	CSC-1_GI_9_1=SCAFFOLD_1977=GI_9_2	11348242	+	N	G	N	A	A	A	A	N	G	G	G	N	A	N	N	G	A	N	G	A	A	R	G	A	A	G	N	A	N	A	A	G	N	G	A	G	G	G	R	G	G
3673	3673	M3673	SCSC-1_GI_9_1=S	C/G	3	CSC-1_GI_9_1=SCAFFOLD_1977=GI_9_2	11348259	+	N	G	N	C	C	C	C	N	G	G	G	N	C	N	N	G	C	N	G	C	C	S	G	C	C	G	N	C	N	C	C	G	N	G	C	G	G	G	S	G	G
3674	3674	M3674	SCSC-1_GI_9_1=S	C/T	3	CSC-1_GI_9_1=SCAFFOLD_1977=GI_9_2	11389278	+	N	C	N	T	T	T	T	N	C	C	C	N	T	N	N	C	T	N	C	T	T	Y	C	T	N	C	N	T	N	T	T	C	N	N	T	C	C	C	C	C	C
3675	3675	M3675	SCSC-1_GI_9_1=S	G/C	3	CSC-1_GI_9_1=SCAFFOLD_1977=GI_9_2	11390194	+	N	C	N	G	G	G	G	N	C	C	C	N	G	N	N	C	G	N	C	G	G	S	C	G	N	C	N	G	N	G	G	C	N	C	G	C	C	C	S	C	C
3676	3676	M3676	SCSC-1_GI_9_1=S	A/C	3	CSC-1_GI_9_1=SCAFFOLD_1977=GI_9_2	11392861	+	N	A	N	C	C	C	C	N	A	A	A	N	C	N	N	A	C	N	A	C	C	M	A	C	C	A	N	C	N	C	C	A	N	A	C	A	M	A	M	A	A
3677	3677	M3677	SCSC-1_GI_9_1=S	C/G	3	CSC-1_GI_9_1=SCAFFOLD_1977=GI_9_2	11466523	+	N	C	N	G	G	G	G	N	C	C	C	N	G	N	N	C	G	N	C	G	G	S	C	G	N	C	N	G	N	G	G	C	N	C	G	C	C	C	G	C	C
3678	3678	M3678	SCSC-1_GI_9_1=S	T/A	3	CSC-1_GI_9_1=SCAFFOLD_1977=GI_9_2	11466549	+	A	T	N	A	A	A	A	N	T	T	T	N	A	N	N	T	A	N	T	A	A	W	T	A	N	T	N	A	N	A	A	T	N	T	A	T	T	T	A	T	T
3679	3679	M3679	SCSC-1_GI_9_1=S	A/C	3	CSC-1_GI_9_1=SCAFFOLD_1977=GI_9_2	11496785	+	N	A	A	C	C	C	C	N	A	A	A	N	C	N	N	A	C	N	A	C	C	M	A	C	C	A	N	C	N	C	C	A	N	A	C	A	A	A	M	A	A
3680	3680	M3680	SCSC-1_GI_9_1=S	G/A	3	CSC-1_GI_9_1=SCAFFOLD_1977=GI_9_2	11496800	+	N	G	G	A	A	A	A	N	G	G	G	N	A	N	N	G	A	N	G	A	A	R	G	A	A	G	N	A	N	A	A	G	N	G	A	G	G	G	R	G	G
3681	3681	M3681	SCSC-1_GI_9_1=S	T/C	3	CSC-1_GI_9_1=SCAFFOLD_1977=GI_9_2	11496812	+	N	T	T	C	C	C	C	N	T	T	T	N	C	N	N	T	C	N	T	C	C	Y	T	C	C	T	N	C	N	C	C	T	N	T	C	T	T	T	Y	T	T
3682	3682	M3682	SCSC-1_GI_9_1=S	A/T	3	CSC-1_GI_9_1=SCAFFOLD_1977=GI_9_2	11496875	+	N	A	N	T	T	T	T	N	A	A	A	N	T	N	N	A	T	N	A	T	T	W	A	T	T	A	N	T	N	T	T	A	N	A	T	A	A	A	T	A	A
3687	3687	M3687	SCSC-1_GI_9_1=S	G/A	3	CSC-1_GI_9_1=SCAFFOLD_1977=GI_9_2	11509648	+	N	G	N	A	A	A	A	N	G	G	G	N	A	N	N	G	A	N	G	A	A	R	G	A	N	G	N	A	N	A	A	G	N	G	A	G	G	G	R	G	G
3689	3689	M3689	SCSC-1_GI_9_1=S	C/T	3	CSC-1_GI_9_1=SCAFFOLD_1977=GI_9_2	11522032	+	N	C	N	T	T	T	T	N	C	C	C	N	T	N	N	C	T	N	C	T	T	Y	C	T	N	C	N	T	N	T	T	C	N	C	T	C	C	C	Y	C	C
3690	3690	M3690	SCSC-1_GI_9_1=S	T/A	3	CSC-1_GI_9_1=SCAFFOLD_1977=GI_9_2	11644095	+	N	T	N	A	A	A	A	N	T	T	T	N	A	N	N	T	A	N	T	A	A	W	T	A	N	T	N	A	N	A	A	T	N	T	A	T	T	T	T	T	T
3693	3693	M3693	SCSC-1_GI_9_1=S	G/T	3	CSC-1_GI_9_1=SCAFFOLD_1977=GI_9_2	11687795	+	N	G	N	T	T	T	T	N	G	N	G	N	T	N	N	G	T	N	G	T	T	K	G	T	T	G	N	T	N	T	T	G	N	G	T	G	G	G	G	G	G
3694	3694	M3694	SCSC-1_GI_9_1=S	G/A	3	CSC-1_GI_9_1=SCAFFOLD_1977=GI_9_2	11688196	+	N	G	N	A	A	A	A	N	G	G	G	N	A	N	N	G	N	N	G	A	A	R	G	A	A	G	N	A	N	A	A	G	N	G	A	G	G	G	G	G	G
3695	3695	M3695	SCSC-1_GI_9_1=S	T/A	3	CSC-1_GI_9_1=SCAFFOLD_1977=GI_9_2	11737252	+	N	T	N	T	A	A	A	N	T	T	T	N	A	A	N	T	A	N	T	A	A	W	T	A	N	T	N	A	N	A	A	T	N	T	A	T	T	T	T	T	T
3696	3696	M3696	SCSC-1_GI_9_1=S	T/G	3	CSC-1_GI_9_1=SCAFFOLD_1977=GI_9_2	11737319	+	N	T	N	T	G	G	G	N	T	T	T	N	G	N	N	T	G	N	T	G	G	K	T	G	G	T	N	G	N	G	G	T	N	T	G	T	T	T	T	T	T
3699	3699	M3699	SCSC-1_GI_9_1=S	C/T	3	CSC-1_GI_9_1=SCAFFOLD_1977=GI_9_2	11929180	+	N	T	N	T	C	C	C	N	T	T	T	N	C	N	N	T	C	N	T	C	C	Y	T	C	C	C	N	C	N	C	C	Y	N	T	C	T	T	T	T	T	T
3700	3700	M3700	SCSC-1_GI_9_1=S	G/A	3	CSC-1_GI_9_1=SCAFFOLD_1977=GI_9_2	11950691	+	N	G	G	G	A	A	A	N	G	G	G	N	A	N	N	G	A	N	G	A	A	R	G	A	N	A	N	A	N	A	A	R	N	G	A	G	G	G	G	G	G
3701	3701	M3701	SCSC-1_GI_9_1=S	T/G	3	CSC-1_GI_9_1=SCAFFOLD_1977=GI_9_2	11959311	+	N	T	N	T	G	G	G	N	T	T	T	N	G	N	N	T	G	N	T	G	G	K	T	G	G	G	N	G	N	G	G	K	N	T	G	T	T	T	T	T	T
3702	3702	M3702	SCSC-1_GI_9_1=S	A/G	3	CSC-1_GI_9_1=SCAFFOLD_1977=GI_9_2	11999864	+	N	A	N	A	G	G	G	N	A	A	A	N	G	N	N	A	G	N	A	G	G	R	A	G	N	G	N	G	N	G	G	R	N	A	G	A	A	A	A	A	A
3703	3703	M3703	SCSC-1_GI_9_1=S	C/T	3	CSC-1_GI_9_1=SCAFFOLD_1977=GI_9_2	11999869	+	N	C	N	C	T	T	T	N	C	C	C	N	T	N	N	C	T	N	C	T	T	Y	C	T	N	T	N	T	N	T	T	Y	N	C	T	C	C	C	C	C	C
3704	3704	M3704	SCSC-1_GI_9_1=S	C/T	3	CSC-1_GI_9_1=SCAFFOLD_1977=GI_9_2	12067145	+	C	C	N	C	T	T	T	N	C	C	C	N	T	N	N	C	T	N	C	T	T	Y	C	T	T	T	N	T	N	T	T	T	N	C	T	C	C	C	C	C	C
3705	3705	M3705	SCSC-1_GI_9_1=S	C/A	3	CSC-1_GI_9_1=SCAFFOLD_1977=GI_9_2	12110195	+	N	A	N	A	C	C	C	N	A	A	A	N	C	N	N	A	C	N	A	C	C	M	A	C	N	C	N	C	N	C	C	C	N	A	C	A	A	A	A	A	A
3706	3706	M3706	SCSC-1_GI_9_1=S	C/A	3	CSC-1_GI_9_1=SCAFFOLD_1977=GI_9_2	12159818	+	N	C	N	C	A	A	A	N	C	C	C	N	A	N	N	C	C	N	C	A	A	M	C	A	A	A	N	A	N	A	A	M	N	C	A	C	C	C	C	C	C
3709	3709	M3709	SCSC-1_GI_9_1=S	A/G	3	CSC-1_GI_9_1=SCAFFOLD_1977=GI_9_2	12260670	+	N	A	N	A	G	G	G	N	A	A	A	N	G	N	N	A	A	N	A	G	G	R	A	G	G	G	N	G	N	G	G	R	N	A	G	A	A	A	A	A	A
3711	3711	M3711	SCSC-1_GI_9_1=S	A/T	3	CSC-1_GI_9_1=SCAFFOLD_1977=GI_9_2	12281590	+	N	A	N	A	T	T	T	N	A	A	A	N	T	N	N	A	A	N	A	T	T	W	A	T	N	T	N	T	N	T	T	W	N	A	T	A	A	A	A	A	A
3714	3714	M3714	SCSC-1_GI_9_1=S	A/G	3	CSC-1_GI_9_1=SCAFFOLD_1977=GI_9_2	12321090	+	N	A	N	A	G	G	G	N	A	A	A	N	G	N	N	A	A	N	A	G	G	R	A	G	N	G	N	G	N	G	G	R	N	A	G	A	A	A	A	A	A
3715	3715	M3715	SCSC-1_GI_9_1=S	C/T	3	CSC-1_GI_9_1=SCAFFOLD_1977=GI_9_2	12321194	+	N	C	N	C	T	T	T	N	C	C	C	N	T	N	N	C	C	N	C	T	T	Y	C	T	T	T	N	T	N	T	T	T	N	C	T	C	C	C	C	C	C
3716	3716	M3716	SCSC-1_GI_9_1=S	T/C	3	CSC-1_GI_9_1=SCAFFOLD_1977=GI_9_2	12350327	+	N	T	N	T	C	C	C	N	T	T	T	N	C	N	N	T	T	N	T	C	C	Y	T	C	N	C	N	C	N	C	C	Y	N	T	C	T	T	T	T	T	T
3717	3717	M3717	SCSC-1_GI_9_1=S	A/T	3	CSC-1_GI_9_1=SCAFFOLD_1977=GI_9_2	12375932	+	N	T	N	T	A	A	A	N	T	T	T	N	A	N	N	T	T	N	T	A	A	W	T	A	A	A	N	A	N	A	A	W	N	T	A	T	T	T	T	T	T
3718	3718	M3718	SCSC-1_GI_9_1=S	T/C	3	CSC-1_GI_9_1=SCAFFOLD_1977=GI_9_2	12398322	+	N	T	N	T	C	C	C	N	T	T	T	T	C	N	N	T	T	N	T	C	C	Y	T	C	C	C	N	C	N	C	C	Y	N	T	C	T	T	T	T	T	T
3719	3719	M3719	SCSC-1_GI_9_1=S	A/C	3	CSC-1_GI_9_1=SCAFFOLD_1977=GI_9_2	12431954	+	N	A	N	A	C	C	C	N	A	A	A	N	C	N	N	A	A	N	A	C	C	M	A	C	C	C	N	C	N	C	C	M	C	A	C	A	A	A	A	A	A
3720	3720	M3720	SCSC-1_GI_9_1=S	G/A	3	CSC-1_GI_9_1=SCAFFOLD_1977=GI_9_2	12431957	+	N	G	N	G	A	A	A	N	G	G	G	N	A	N	N	G	G	N	G	A	A	R	G	A	A	A	N	A	N	A	A	R	A	G	A	G	G	G	G	G	G
3721	3721	M3721	SCSC-1_GI_9_1=S	T/C	3	CSC-1_GI_9_1=SCAFFOLD_1977=GI_9_2	12442488	+	N	T	N	T	C	C	C	N	T	T	T	N	C	N	N	T	T	N	T	C	C	Y	T	C	C	C	N	C	N	C	C	C	N	T	C	T	T	T	T	T	T
3722	3722	M3722	SCSC-1_GI_9_1=S	G/A	3	CSC-1_GI_9_1=SCAFFOLD_1977=GI_9_2	12523625	+	N	G	N	G	A	A	A	N	G	G	G	N	A	N	N	G	G	N	G	A	A	A	G	A	N	A	N	A	N	A	A	R	N	A	A	G	G	G	G	G	G
3723	3723	M3723	SCSC-1_GI_9_1=S	C/T	3	CSC-1_GI_9_1=SCAFFOLD_1977=GI_9_2	12558964	+	N	C	C	C	T	T	T	N	C	C	C	N	T	N	N	C	C	N	C	T	T	T	C	T	T	T	N	T	N	T	T	Y	N	T	T	C	C	C	C	C	C
3724	3724	M3724	SCSC-1_GI_9_1=S	G/A	3	CSC-1_GI_9_1=SCAFFOLD_1977=GI_9_2	12559098	+	N	G	N	G	A	A	A	N	G	G	G	N	A	N	N	G	G	N	G	A	A	A	G	A	A	A	N	A	N	A	A	R	N	A	A	G	G	G	G	G	G
3727	3727	M3727	SCSC-1_GI_9_1=S	A/C	3	CSC-1_GI_9_1=SCAFFOLD_1977=GI_9_2	12571912	+	N	A	N	A	C	C	C	N	A	A	A	N	C	N	N	A	A	N	A	C	C	C	A	C	C	C	N	C	N	C	C	M	N	C	C	A	A	A	A	A	A
3728	3728	M3728	SCSC-1_GI_9_1=S	C/T	3	CSC-1_GI_9_1=SCAFFOLD_1977=GI_9_2	12571921	+	N	C	N	C	T	T	T	N	C	C	C	N	T	N	N	C	C	N	C	T	T	T	C	T	T	T	N	T	N	T	T	Y	N	T	T	C	C	C	C	C	C
3729	3729	M3729	SCSC-1_GI_9_1=S	T/C	3	CSC-1_GI_9_1=SCAFFOLD_1977=GI_9_2	12571951	+	N	T	N	T	C	C	C	N	T	T	T	N	C	N	N	T	T	N	T	C	C	C	T	C	C	C	N	C	N	C	C	Y	N	C	C	T	T	T	T	T	T
3730	3730	M3730	SCSC-1_GI_9_1=S	T/A	3	CSC-1_GI_9_1=SCAFFOLD_1977=GI_9_2	12572083	+	N	T	N	T	A	A	A	N	T	T	T	N	A	N	N	T	T	N	T	A	A	A	T	A	A	A	N	A	N	A	A	W	N	A	A	T	T	T	T	T	T
3731	3731	M3731	SCSC-1_GI_9_1=S	C/T	3	CSC-1_GI_9_1=SCAFFOLD_1977=GI_9_2	12572107	+	N	C	N	C	T	T	T	N	C	C	C	N	T	N	N	C	C	N	C	T	T	T	C	T	T	T	N	T	N	T	T	Y	N	T	T	C	C	C	C	C	C
3732	3732	M3732	SCSC-1_GI_9_1=S	C/T	3	CSC-1_GI_9_1=SCAFFOLD_1977=GI_9_2	12572339	+	N	C	N	C	T	T	T	N	C	C	C	N	T	N	N	C	C	N	C	T	T	T	C	T	T	T	N	T	N	T	T	Y	N	T	T	C	C	C	C	C	C
3733	3733	M3733	SCSC-1_GI_9_1=S	A/G	3	CSC-1_GI_9_1=SCAFFOLD_1977=GI_9_2	12572366	+	N	A	N	A	G	G	G	N	A	A	A	N	G	N	N	A	A	N	A	G	G	G	A	G	G	G	N	G	N	G	G	R	N	G	G	A	A	A	A	A	A
3737	3737	M3737	SCSC-1_GI_9_1=S	A/G	3	CSC-1_GI_9_1=SCAFFOLD_1977=GI_9_2	12613195	+	A	A	N	A	G	G	G	N	A	A	A	N	G	N	N	A	A	N	A	G	G	G	A	G	N	G	N	G	N	G	G	R	N	G	G	A	A	A	A	A	A
3741	3741	M3741	SCSC-1_GI_9_1=S	C/T	3	CSC-1_GI_9_1=SCAFFOLD_1977=GI_9_2	12728470	+	N	C	N	C	T	T	T	N	C	C	C	N	T	N	N	C	C	N	C	T	T	T	C	T	N	T	N	T	N	T	T	T	N	T	T	C	T	C	C	C	C
3742	3742	M3742	SCSC-1_GI_9_1=S	G/T	3	CSC-1_GI_9_1=SCAFFOLD_1977=GI_9_2	12764410	+	N	G	N	G	T	T	T	N	G	G	G	N	T	N	N	G	G	N	G	T	T	T	G	T	T	T	N	T	N	T	T	T	N	T	T	G	T	G	G	G	G
3743	3743	M3743	SCSC-1_GI_9_1=S	C/T	3	CSC-1_GI_9_1=SCAFFOLD_1977=GI_9_2	12764455	+	N	T	N	T	C	C	C	N	T	T	T	N	C	N	N	T	T	N	T	C	C	C	T	C	C	C	N	C	N	C	C	C	N	C	C	T	C	T	T	T	T
3744	3744	M3744	SCSC-1_GI_9_1=S	A/C	3	CSC-1_GI_9_1=SCAFFOLD_1977=GI_9_2	12764459	+	N	C	N	C	A	A	A	N	C	C	C	N	A	N	N	C	C	N	C	A	A	A	C	A	A	A	N	A	N	A	A	A	N	A	A	C	A	C	C	C	C
3745	3745	M3745	SCSC-1_GI_9_1=S	C/T	3	CSC-1_GI_9_1=SCAFFOLD_1977=GI_9_2	12764482	+	N	C	N	C	T	T	T	N	C	C	C	N	T	N	N	C	C	N	C	T	T	T	C	T	T	T	N	T	N	T	T	T	N	T	T	C	T	C	C	C	C
3746	3746	M3746	SCSC-1_GI_9_1=S	A/T	3	CSC-1_GI_9_1=SCAFFOLD_1977=GI_9_2	12779157	+	N	A	N	A	T	T	T	N	A	A	A	N	T	N	N	T	A	N	A	T	T	T	A	T	T	T	N	T	N	T	T	T	N	T	T	A	T	A	A	A	A
3747	3747	M3747	SCSC-1_GI_9_1=S	A/G	3	CSC-1_GI_9_1=SCAFFOLD_1977=GI_9_2	12923497	+	N	A	N	A	G	G	G	N	A	A	A	N	G	N	N	G	A	N	A	G	G	G	A	G	N	G	N	G	N	G	G	G	N	G	G	A	G	A	A	A	A
3748	3748	M3748	SCSC-1_GI_9_1=S	A/G	3	CSC-1_GI_9_1=SCAFFOLD_1977=GI_9_2	12923560	+	N	G	N	G	A	A	A	N	G	G	G	N	A	N	N	A	G	N	G	A	A	A	G	A	A	A	N	A	N	A	A	A	N	A	A	G	A	G	G	G	G
3749	3749	M3749	SCSC-1_GI_9_1=S	T/A	3	CSC-1_GI_9_1=SCAFFOLD_1977=GI_9_2	12933334	+	N	T	N	T	A	A	A	N	T	T	T	N	A	N	N	A	T	N	T	A	A	A	T	A	N	A	N	A	N	A	A	A	N	A	A	T	A	T	T	T	T
3750	3750	M3750	SCSC-1_GI_9_1=S	A/G	3	CSC-1_GI_9_1=SCAFFOLD_1977=GI_9_2	12934977	+	N	G	N	G	A	A	A	N	G	G	G	N	A	N	N	A	G	N	G	A	A	A	G	A	A	A	N	A	N	A	A	A	N	A	A	G	A	G	G	G	G
3751	3751	M3751	SCSC-1_GI_9_1=S	G/A	3	CSC-1_GI_9_1=SCAFFOLD_1977=GI_9_2	12945162	+	N	A	N	A	G	G	G	N	A	A	A	N	G	N	N	G	A	N	A	G	G	G	A	G	G	G	N	G	N	G	G	G	N	G	G	A	G	A	A	A	A
3752	3752	M3752	SCSC-1_GI_9_1=S	A/G	3	CSC-1_GI_9_1=SCAFFOLD_1977=GI_9_2	12945189	+	N	G	N	G	A	A	A	N	G	G	G	N	A	N	N	A	G	N	G	A	A	A	G	A	A	A	N	A	N	A	A	A	N	A	A	G	A	G	G	G	G
3753	3753	M3753	SCSC-1_GI_9_1=S	T/A	3	CSC-1_GI_9_1=SCAFFOLD_1977=GI_9_2	12945207	+	N	A	N	A	T	T	T	N	A	A	A	N	T	N	N	T	A	N	A	T	T	T	A	T	T	T	N	T	N	T	T	T	N	T	T	A	T	A	A	A	A
3754	3754	M3754	SCSC-1_GI_9_1=S	T/A	3	CSC-1_GI_9_1=SCAFFOLD_1977=GI_9_2	12945237	+	N	A	N	A	T	T	T	N	A	A	A	N	T	N	N	T	A	N	A	T	T	T	A	T	N	T	N	T	N	T	T	T	N	T	T	A	T	A	A	A	A
3755	3755	M3755	SCSC-1_GI_9_1=S	G/C	3	CSC-1_GI_9_1=SCAFFOLD_1977=GI_9_2	12967490	+	N	G	N	G	C	C	C	N	G	G	G	N	C	N	N	C	G	N	G	C	S	C	G	C	N	G	N	C	N	C	C	C	N	C	C	G	C	G	G	G	G
3756	3756	M3756	SCSC-1_GI_9_1=S	C/T	3	CSC-1_GI_9_1=SCAFFOLD_1977=GI_9_2	12971463	+	N	C	N	C	T	T	T	N	C	C	C	N	T	N	N	T	C	N	C	T	T	T	C	T	T	C	N	T	N	T	T	T	N	T	T	C	T	C	C	C	C
3757	3757	M3757	SCSC-1_GI_9_1=S	C/G	3	CSC-1_GI_9_1=SCAFFOLD_1977=GI_9_2	12978401	+	N	C	N	C	G	G	G	N	C	C	C	N	G	N	N	G	C	N	C	G	G	G	C	G	G	C	N	G	N	G	G	G	N	G	G	C	G	C	C	C	C
3758	3758	M3758	SCSC-1_GI_9_1=S	T/C	3	CSC-1_GI_9_1=SCAFFOLD_1977=GI_9_2	12997391	+	N	T	N	T	C	C	C	N	T	T	T	N	C	N	N	C	T	N	T	C	C	C	T	C	C	T	N	C	N	C	C	C	N	C	C	T	C	T	T	T	T
3759	3759	M3759	SCSC-1_GI_9_1=S	G/T	3	CSC-1_GI_9_1=SCAFFOLD_1977=GI_9_2	12997394	+	N	G	N	G	T	T	T	N	G	G	G	N	T	N	N	T	G	N	G	T	T	T	G	T	T	G	N	T	N	T	T	T	N	T	T	G	T	G	G	G	G
3760	3760	M3760	SCSC-1_GI_9_1=S	A/G	3	CSC-1_GI_9_1=SCAFFOLD_1977=GI_9_2	12998640	+	N	A	N	A	G	G	G	N	A	A	A	N	G	N	N	G	A	N	A	G	G	G	A	G	N	A	N	G	N	G	G	G	N	G	G	A	G	A	A	A	A
3761	3761	M3761	SCSC-1_GI_9_1=S	A/G	3	CSC-1_GI_9_1=SCAFFOLD_1977=GI_9_2	12999715	+	N	A	A	A	G	G	G	N	A	A	A	N	G	N	N	G	A	N	A	G	G	G	A	G	G	A	N	G	N	G	G	G	N	G	G	A	G	A	A	A	A
3762	3762	M3762	SCSC-1_GI_9_1=S	C/T	3	CSC-1_GI_9_1=SCAFFOLD_1977=GI_9_2	12999721	+	N	C	C	C	T	T	T	N	C	C	C	N	T	N	N	T	C	N	C	T	T	T	C	T	T	C	N	T	N	T	T	T	N	T	T	C	T	C	C	C	C
3763	3763	M3763	SCSC-1_GI_9_1=S	A/G	3	CSC-1_GI_9_1=SCAFFOLD_1977=GI_9_2	12999930	+	N	A	N	A	G	G	G	N	A	A	A	N	G	N	N	G	A	N	A	G	G	G	A	G	G	A	N	G	N	G	G	G	N	G	G	A	G	A	A	A	A
3764	3764	M3764	SCSC-1_GI_9_1=S	A/C	3	CSC-1_GI_9_1=SCAFFOLD_1977=GI_9_2	13191997	+	N	C	N	C	A	C	A	N	C	C	C	N	A	N	N	A	A	N	C	A	A	A	C	A	A	C	N	A	N	A	A	A	N	A	A	C	C	C	C	C	C
3765	3765	M3765	SCSC-1_GI_9_1=S	A/G	3	CSC-1_GI_9_1=SCAFFOLD_1977=GI_9_2	13192377	+	N	G	N	G	A	G	A	N	G	G	G	N	A	N	N	A	A	N	G	R	A	A	G	A	N	G	N	A	N	A	A	A	N	A	A	G	G	G	G	G	G
3766	3766	M3766	SCSC-1_GI_9_1=S	C/G	3	CSC-1_GI_9_1=SCAFFOLD_1977=GI_9_2	13192380	+	N	G	N	G	C	G	C	N	G	G	G	N	C	N	N	C	C	N	G	S	C	C	G	C	N	G	N	C	N	C	C	C	N	C	C	G	G	G	G	G	G
3767	3767	M3767	SCSC-1_GI_9_1=S	G/A	3	CSC-1_GI_9_1=SCAFFOLD_1977=GI_9_2	13330682	+	N	A	N	A	G	A	G	N	A	A	A	N	G	N	N	G	G	N	A	G	G	G	A	G	G	A	N	G	N	G	G	G	N	G	G	A	A	A	A	A	A
3768	3768	M3768	SCSC-1_GI_9_1=S	G/A	3	CSC-1_GI_9_1=SCAFFOLD_1977=GI_9_2	13330724	+	N	A	N	A	G	A	G	N	A	A	A	N	G	N	N	G	G	N	A	G	G	G	A	G	G	A	N	G	N	G	G	G	N	G	G	A	A	A	A	A	A
3769	3769	M3769	SCSC-1_GI_9_1=S	C/T	3	CSC-1_GI_9_1=SCAFFOLD_1977=GI_9_2	13337819	+	N	T	N	T	C	T	C	N	T	T	T	N	C	N	N	C	C	N	T	C	C	C	T	C	C	T	N	C	N	C	C	C	N	C	C	T	T	T	T	T	T
3772	3772	M3772	SCSC-1_GI_9_1=S	T/C	3	CSC-1_GI_9_1=SCAFFOLD_1977=GI_9_2	13430195	+	N	C	N	C	T	C	T	N	C	C	C	N	T	N	N	T	T	N	C	T	C	T	C	T	N	C	N	T	N	T	T	T	N	T	T	T	C	C	C	C	C
3780	3780	M3780	SCSC-1_GI_9_1=S	A/G	3	CSC-1_GI_9_1=SCAFFOLD_1977=GI_9_2	13553248	+	G	G	N	G	A	G	A	N	G	G	G	N	A	N	N	A	A	N	A	A	G	A	G	A	A	G	N	A	N	A	A	A	N	G	A	A	G	G	G	G	G
3781	3781	M3781	SCSC-1_GI_9_1=S	C/T	3	CSC-1_GI_9_1=SCAFFOLD_1977=GI_9_2	13553291	+	T	T	N	T	C	T	C	N	T	T	T	N	C	N	N	C	C	N	C	C	T	C	T	C	C	T	N	C	N	C	C	C	N	T	C	C	T	T	T	T	T
3782	3782	M3782	SCSC-1_GI_9_1=S	G/T	3	CSC-1_GI_9_1=SCAFFOLD_1977=GI_9_2	13553510	+	N	T	N	T	G	T	G	N	T	T	T	N	G	N	N	G	G	N	G	G	T	G	T	G	G	T	N	G	N	G	G	G	N	T	G	G	T	T	T	T	T
3783	3783	M3783	SCSC-1_GI_9_1=S	A/G	3	CSC-1_GI_9_1=SCAFFOLD_1977=GI_9_2	13553514	+	N	G	N	G	A	G	A	N	G	G	G	N	A	N	N	A	A	N	A	A	G	A	G	A	A	G	N	A	N	A	A	A	N	G	A	A	G	G	G	G	G
3784	3784	M3784	SCSC-1_GI_9_1=S	A/G	3	CSC-1_GI_9_1=SCAFFOLD_1977=GI_9_2	13553523	+	N	G	N	G	A	G	A	N	G	G	G	N	A	N	N	A	A	N	A	A	G	A	G	A	A	G	N	A	N	A	A	A	N	G	A	A	G	G	G	G	G
3785	3785	M3785	SCSC-1_GI_9_1=S	G/C	3	CSC-1_GI_9_1=SCAFFOLD_1977=GI_9_2	13553650	+	N	C	N	C	G	C	G	N	C	C	C	N	G	N	N	G	G	N	G	G	C	G	C	G	G	C	N	G	N	G	G	G	N	C	G	G	C	C	C	C	C
3786	3786	M3786	SCSC-1_GI_9_1=S	G/A	3	CSC-1_GI_9_1=SCAFFOLD_1977=GI_9_2	13560746	+	N	A	N	A	G	A	G	N	A	A	A	N	G	N	N	G	G	N	G	G	A	G	A	G	N	A	N	G	N	G	G	G	N	A	G	G	A	A	A	A	A
3787	3787	M3787	SCSC-1_GI_9_1=S	G/T	3	CSC-1_GI_9_1=SCAFFOLD_1977=GI_9_2	13560812	+	N	T	N	T	G	T	G	N	T	T	T	N	G	N	N	G	G	N	G	G	T	G	T	G	N	T	N	G	N	G	G	G	N	T	G	G	T	T	T	T	T
3790	3790	M3790	SCSC-1_GI_9_1=S	T/C	3	CSC-1_GI_9_1=SCAFFOLD_1977=GI_9_2	13709666	+	C	C	N	C	T	C	T	N	C	C	C	N	T	N	N	T	T	N	T	T	C	T	C	T	C	C	N	T	N	T	T	T	N	C	T	T	C	C	C	C	C
3791	3791	M3791	SCSC-1_GI_9_1=S	T/C	3	CSC-1_GI_9_1=SCAFFOLD_1977=GI_9_2	13712910	+	N	C	N	C	T	C	T	N	C	C	C	N	T	N	N	T	T	N	T	T	C	T	C	T	N	C	N	T	N	T	T	T	N	C	T	T	C	C	C	C	C
3792	3792	M3792	SCSC-1_GI_9_1=S	G/C	3	CSC-1_GI_9_1=SCAFFOLD_1977=GI_9_2	13717011	+	N	C	N	C	G	C	G	N	C	C	C	N	G	N	N	G	G	N	G	G	C	G	C	G	N	C	N	G	N	G	G	G	N	N	G	G	C	C	N	C	C
3793	3793	M3793	SCSC-1_GI_9_1=S	A/G	3	CSC-1_GI_9_1=SCAFFOLD_1977=GI_9_2	13717014	+	N	G	N	G	A	G	A	N	G	G	G	N	A	N	N	A	A	N	A	A	G	A	G	A	N	G	N	A	N	A	A	A	N	N	A	A	G	G	N	G	G
3794	3794	M3794	SCSC-1_GI_9_1=S	A/G	3	CSC-1_GI_9_1=SCAFFOLD_1977=GI_9_2	13717027	+	N	G	N	G	A	G	A	N	G	G	G	N	A	N	N	A	A	N	A	A	G	A	G	A	N	G	N	A	N	A	A	A	N	N	A	A	G	G	N	G	G
3796	3796	M3796	SCSC-1_GI_9_1=S	G/A	3	CSC-1_GI_9_1=SCAFFOLD_1977=GI_9_2	13769108	+	N	A	N	A	G	A	G	N	A	A	A	N	G	N	N	G	G	N	G	G	A	G	A	G	A	A	N	G	N	G	G	G	N	A	G	G	A	A	A	A	A
3801	3801	M3801	SCSC-1_GI_9_1=S	T/C	3	CSC-1_GI_9_1=SCAFFOLD_1977=GI_9_2	13803174	+	N	C	N	C	T	C	T	N	C	C	C	N	T	N	N	T	T	N	T	T	C	T	C	T	N	C	N	T	N	T	T	T	N	C	T	T	C	C	C	C	C
3802	3802	M3802	SCSC-1_GI_9_1=S	G/A	3	CSC-1_GI_9_1=SCAFFOLD_1977=GI_9_2	13840635	+	N	A	N	A	G	A	G	N	A	A	A	N	G	N	N	G	G	N	G	G	A	G	A	G	A	A	N	G	N	G	G	G	N	A	G	G	A	A	A	A	A
3803	3803	M3803	SCSC-1_GI_9_1=S	G/A	3	CSC-1_GI_9_1=SCAFFOLD_1977=GI_9_2	13844362	+	N	A	N	A	G	A	G	N	A	A	A	N	G	N	N	G	G	N	G	G	A	G	A	G	A	A	N	G	N	G	G	G	A	A	G	G	A	A	A	A	A
3809	3809	M3809	SCSC-1_GI_9_1=S	T/A	3	CSC-1_GI_9_1=SCAFFOLD_1977=GI_9_2	13983782	+	N	A	N	A	T	A	A	N	A	A	A	N	T	N	N	T	T	N	T	T	A	T	A	A	N	A	N	T	N	T	T	T	N	A	T	T	T	A	A	A	A
3811	3811	M3811	SCSC-1_GI_9_1=S	A/T	3	CSC-1_GI_9_1=SCAFFOLD_1977=GI_9_2	14110815	+	N	T	N	T	A	T	T	N	T	T	T	N	A	N	N	A	A	N	A	A	T	A	T	T	N	T	N	A	N	A	A	A	N	T	A	A	A	T	T	T	T
3812	3812	M3812	SCSC-1_GI_9_1=S	A/G	3	CSC-1_GI_9_1=SCAFFOLD_1977=GI_9_2	14118695	+	N	G	N	G	A	G	G	N	G	G	G	N	A	N	N	A	A	N	A	A	G	A	G	G	G	G	N	A	N	A	A	A	N	G	A	A	A	G	G	G	G
3814	3814	M3814	SCSC-1_GI_9_1=S	A/G	3	CSC-1_GI_9_1=SCAFFOLD_1977=GI_9_2	14163714	+	G	G	N	G	A	G	G	N	G	G	G	N	A	N	N	A	A	N	A	A	G	A	G	G	N	G	N	A	N	A	A	A	N	G	G	A	A	G	G	G	G
3815	3815	M3815	SCSC-1_GI_9_1=S	C/T	3	CSC-1_GI_9_1=SCAFFOLD_1977=GI_9_2	14165359	+	N	T	N	T	C	T	T	N	T	T	T	N	C	N	N	C	C	N	C	C	T	C	T	T	N	T	N	C	N	C	C	C	N	T	T	C	C	T	T	T	T
3816	3816	M3816	SCSC-1_GI_9_1=S	C/T	3	CSC-1_GI_9_1=SCAFFOLD_1977=GI_9_2	14225829	+	N	T	N	T	C	C	T	N	T	T	T	N	C	N	N	C	C	N	C	C	T	C	T	T	N	T	N	C	N	C	C	C	N	T	C	C	T	T	T	T	T
3817	3817	M3817	SCSC-1_GI_9_1=S	G/T	3	CSC-1_GI_9_1=SCAFFOLD_1977=GI_9_2	14233371	+	N	T	N	T	G	G	T	N	T	T	T	N	G	N	N	G	G	N	G	G	T	G	T	T	T	T	N	G	N	G	G	G	N	T	G	G	T	T	T	T	T
3818	3818	M3818	SCSC-1_GI_9_1=S	A/T	3	CSC-1_GI_9_1=SCAFFOLD_1977=GI_9_2	14317320	+	T	T	N	T	A	A	T	N	T	T	T	N	A	N	N	A	A	N	A	A	T	A	T	T	N	T	N	A	N	A	A	T	N	T	A	A	T	T	T	T	T
3821	3821	M3821	SCSC-1_GI_9_1=S	G/T	3	CSC-1_GI_9_1=SCAFFOLD_1977=GI_9_2	14319413	+	N	T	N	T	G	G	T	N	T	K	T	N	G	N	N	G	G	N	G	G	T	G	T	T	N	T	N	G	N	G	G	T	N	T	G	G	T	T	T	T	T
3822	3822	M3822	SCSC-1_GI_9_1=S	A/T	3	CSC-1_GI_9_1=SCAFFOLD_1977=GI_9_2	14319596	+	N	T	N	T	A	A	T	N	T	T	T	N	A	N	N	A	A	N	A	A	T	A	T	T	T	T	N	A	N	A	A	T	N	T	A	A	T	T	T	T	T
3823	3823	M3823	SCSC-1_GI_9_1=S	G/C	3	CSC-1_GI_9_1=SCAFFOLD_1977=GI_9_2	14319599	+	N	C	N	C	G	G	C	N	C	C	C	N	G	N	N	G	G	N	G	G	C	G	C	C	C	C	N	G	N	G	G	C	N	C	G	G	C	C	C	C	C
3824	3824	M3824	SCSC-1_GI_9_1=S	A/C	3	CSC-1_GI_9_1=SCAFFOLD_1977=GI_9_2	14319608	+	N	C	N	C	A	A	C	N	C	C	C	N	A	N	N	A	A	N	A	A	C	A	C	C	C	C	N	A	N	A	A	C	N	C	A	A	C	C	C	C	C
3825	3825	M3825	SCSC-1_GI_9_1=S	G/A	3	CSC-1_GI_9_1=SCAFFOLD_1977=GI_9_2	14319613	+	N	A	N	A	G	G	A	N	A	A	A	N	G	N	N	G	G	N	G	G	A	G	A	A	A	A	N	G	N	G	G	A	N	A	G	G	A	A	A	A	A
3826	3826	M3826	SCSC-1_GI_9_1=S	T/C	3	CSC-1_GI_9_1=SCAFFOLD_1977=GI_9_2	14319689	+	N	C	N	C	T	T	C	N	C	C	C	N	T	N	N	T	T	N	T	T	C	T	C	C	N	C	N	T	N	T	T	C	N	C	T	T	C	C	C	C	C
3827	3827	M3827	SCSC-1_GI_9_1=S	T/C	3	CSC-1_GI_9_1=SCAFFOLD_1977=GI_9_2	14424452	+	N	C	N	C	T	T	C	N	C	C	C	N	T	N	N	T	T	N	T	T	C	T	C	C	C	T	N	T	N	T	T	C	N	C	T	T	C	C	C	C	C
3828	3828	M3828	SCSC-1_GI_9_1=S	C/G	3	CSC-1_GI_9_1=SCAFFOLD_1977=GI_9_2	14426987	+	N	G	N	G	C	C	G	N	G	G	G	N	C	N	N	C	C	N	C	C	G	C	G	G	N	C	N	C	N	C	C	G	N	G	C	C	G	G	G	G	G
3829	3829	M3829	SCSC-1_GI_9_1=S	T/G	3	CSC-1_GI_9_1=SCAFFOLD_1977=GI_9_2	14462808	+	N	G	N	G	T	T	G	N	G	G	G	N	T	N	N	T	T	N	T	T	G	T	G	G	G	T	N	T	N	T	T	G	N	G	T	T	G	G	G	G	G
3830	3830	M3830	SCSC-1_GI_9_1=S	C/T	3	CSC-1_GI_9_1=SCAFFOLD_1977=GI_9_2	14521867	+	N	T	N	T	C	C	T	N	T	T	T	N	C	N	N	C	C	N	C	C	T	C	T	T	T	C	N	C	N	C	C	T	N	T	C	C	T	T	T	T	T
3832	3832	M3832	SCSC-1_GI_9_1=S	T/G	3	CSC-1_GI_9_1=SCAFFOLD_1977=GI_9_2	14557430	+	N	G	N	G	T	T	G	N	G	N	G	N	T	N	N	T	T	N	T	T	G	T	G	G	N	T	N	T	N	T	T	G	N	G	T	T	G	G	G	G	G
3833	3833	M3833	SCSC-1_GI_9_1=S	G/T	3	CSC-1_GI_9_1=SCAFFOLD_1977=GI_9_2	14557467	+	N	T	N	T	G	G	T	N	T	N	T	N	G	N	N	G	G	N	G	G	T	G	T	T	N	G	N	G	N	G	G	T	N	T	G	G	T	T	T	T	T
3834	3834	M3834	SCSC-1_GI_9_1=S	G/T	3	CSC-1_GI_9_1=SCAFFOLD_1977=GI_9_2	14590985	+	N	T	N	T	G	G	T	N	T	T	T	N	G	N	N	G	G	N	G	G	T	G	T	T	N	G	N	G	N	G	G	T	N	T	G	G	T	T	T	G	T
3835	3835	M3835	SCSC-1_GI_9_1=S	A/G	3	CSC-1_GI_9_1=SCAFFOLD_1977=GI_9_2	14602356	+	G	G	N	G	A	A	G	N	G	G	G	N	A	N	N	A	A	N	A	A	G	A	G	G	G	A	N	A	N	A	A	G	N	G	A	A	G	G	G	A	G
3836	3836	M3836	SCSC-1_GI_9_1=S	A/T	3	CSC-1_GI_9_1=SCAFFOLD_1977=GI_9_2	14602418	+	T	T	N	T	A	A	T	N	T	T	T	N	A	N	N	A	A	N	A	A	T	A	T	T	T	A	N	A	N	A	A	T	N	T	A	A	T	T	T	A	T
3837	3837	M3837	SCSC-1_GI_9_1=S	T/C	3	CSC-1_GI_9_1=SCAFFOLD_1977=GI_9_2	14602672	+	N	C	N	C	T	T	C	N	C	C	C	N	T	N	N	T	T	N	T	T	C	T	C	C	C	T	N	T	N	T	T	C	C	C	T	T	C	C	C	T	C
3838	3838	M3838	SCSC-1_GI_9_1=S	A/C	3	CSC-1_GI_9_1=SCAFFOLD_1977=GI_9_2	14602714	+	N	C	N	C	A	A	C	N	C	C	C	N	A	N	N	A	A	N	A	A	C	A	C	C	N	A	N	A	N	A	A	C	C	C	A	A	C	C	C	A	C
3839	3839	M3839	SCSC-1_GI_9_1=S	A/C	3	CSC-1_GI_9_1=SCAFFOLD_1977=GI_9_2	14603045	+	C	C	C	C	A	A	C	N	C	C	C	N	A	N	N	A	A	N	A	A	C	A	C	C	N	A	N	A	N	A	A	C	N	C	A	A	C	C	C	A	C
3840	3840	M3840	SCSC-1_GI_9_1=S	T/G	3	CSC-1_GI_9_1=SCAFFOLD_1977=GI_9_2	14603070	+	G	G	G	G	T	T	G	N	G	G	G	N	T	N	N	T	T	N	T	T	G	T	G	G	N	T	N	T	N	T	T	G	N	G	T	T	G	G	G	T	G
3841	3841	M3841	SCSC-1_GI_9_1=S	A/G	3	CSC-1_GI_9_1=SCAFFOLD_1977=GI_9_2	14665781	+	G	G	N	G	A	A	G	N	G	G	G	N	A	N	N	A	A	N	A	A	G	A	G	G	G	A	N	G	N	A	A	G	N	G	A	A	G	G	G	A	G
3842	3842	M3842	SCSC-1_GI_9_1=S	C/T	3	CSC-1_GI_9_1=SCAFFOLD_1977=GI_9_2	14665785	+	T	T	N	T	C	C	T	N	T	T	T	N	C	N	N	C	C	N	C	C	T	C	T	T	T	C	N	T	N	C	C	T	N	T	C	C	T	T	T	C	T
3843	3843	M3843	SCSC-1_GI_9_1=S	G/A	3	CSC-1_GI_9_1=SCAFFOLD_1977=GI_9_2	14671903	+	N	A	N	A	G	G	A	N	A	A	A	N	G	N	N	G	G	N	G	G	A	G	A	A	N	G	N	A	N	G	G	A	N	A	G	G	A	A	A	G	A
3844	3844	M3844	SCSC-1_GI_9_1=S	T/G	3	CSC-1_GI_9_1=SCAFFOLD_1977=GI_9_2	14671926	+	N	G	N	G	T	T	G	N	G	G	G	N	T	N	N	T	T	N	T	T	G	T	G	G	N	T	N	G	N	T	T	G	N	G	T	T	G	G	G	T	G
3845	3845	M3845	SCSC-1_GI_9_1=S	A/G	3	CSC-1_GI_9_1=SCAFFOLD_1977=GI_9_2	14671932	+	N	G	N	G	A	A	G	N	G	G	G	N	A	N	N	A	A	N	A	A	G	A	G	G	N	A	N	G	N	A	A	G	N	G	A	A	G	G	G	A	G
3846	3846	M3846	SCSC-1_GI_9_1=S	A/G	3	CSC-1_GI_9_1=SCAFFOLD_1977=GI_9_2	14671939	+	N	G	N	G	A	A	G	N	G	G	G	N	A	N	N	A	A	N	A	A	G	A	G	G	N	A	N	G	N	A	A	G	N	G	A	A	G	G	G	A	G
3847	3847	M3847	SCSC-1_GI_9_1=S	A/T	3	CSC-1_GI_9_1=SCAFFOLD_1977=GI_9_2	14672005	+	N	T	N	T	A	A	T	N	T	T	T	N	A	N	N	A	A	N	A	A	T	A	T	T	N	A	N	T	N	A	A	T	N	T	A	A	T	T	T	A	T
3848	3848	M3848	SCSC-1_GI_9_1=S	A/G	3	CSC-1_GI_9_1=SCAFFOLD_1977=GI_9_2	14672025	+	N	G	N	G	A	A	G	N	G	G	G	N	A	N	N	A	A	N	A	A	G	A	G	G	N	A	N	G	N	A	A	G	N	G	A	A	G	G	G	A	G
3849	3849	M3849	SCSC-1_GI_9_1=S	A/G	3	CSC-1_GI_9_1=SCAFFOLD_1977=GI_9_2	14672110	+	N	G	N	G	A	A	G	N	G	G	G	N	A	N	N	A	A	N	A	A	G	A	G	G	N	A	N	G	N	A	A	G	N	G	A	A	G	G	G	A	G
3850	3850	M3850	SCSC-1_GI_9_1=S	A/C	3	CSC-1_GI_9_1=SCAFFOLD_1977=GI_9_2	14672357	+	N	C	N	C	A	A	C	N	C	C	C	N	A	N	N	A	A	N	A	A	C	A	C	C	C	A	N	C	N	A	A	C	N	C	A	A	C	C	C	A	C
3851	3851	M3851	SCSC-1_GI_9_1=S	T/A	3	CSC-1_GI_9_1=SCAFFOLD_1977=GI_9_2	14672358	+	N	A	N	A	T	T	A	N	A	A	A	N	T	N	N	T	T	N	T	T	A	T	A	A	A	T	N	A	N	T	T	A	N	A	T	T	A	A	A	T	A
3852	3852	M3852	SCSC-1_GI_9_1=S	T/A	3	CSC-1_GI_9_1=SCAFFOLD_1977=GI_9_2	14672368	+	N	A	N	A	T	T	A	N	A	A	A	N	T	N	N	T	T	N	T	T	A	T	A	A	A	T	N	A	N	T	T	A	N	A	T	T	A	A	A	T	A
3853	3853	M3853	SCSC-1_GI_9_1=S	G/A	3	CSC-1_GI_9_1=SCAFFOLD_1977=GI_9_2	14710956	+	N	A	N	A	G	G	A	N	A	A	A	N	G	N	N	G	G	N	G	G	G	G	A	A	N	G	N	A	N	G	G	A	N	A	G	G	A	A	A	G	A
3854	3854	M3854	SCSC-1_GI_9_1=S	A/G	3	CSC-1_GI_9_1=SCAFFOLD_1977=GI_9_2	14710992	+	N	G	N	G	A	A	G	N	G	G	G	N	A	N	N	A	A	N	A	A	A	A	G	G	N	A	N	G	N	A	A	G	N	G	A	A	G	G	G	A	G
3855	3855	M3855	SCSC-1_GI_9_1=S	C/G	3	CSC-1_GI_9_1=SCAFFOLD_1977=GI_9_2	14716468	+	G	G	N	G	C	C	G	N	G	G	G	N	C	N	N	C	C	N	C	C	C	C	G	G	N	C	N	G	N	C	C	G	N	G	C	C	G	G	G	C	G
3856	3856	M3856	SCSC-1_GI_9_1=S	T/A	3	CSC-1_GI_9_1=SCAFFOLD_1977=GI_9_2	14764400	+	A	A	N	A	A	T	A	N	A	A	A	N	T	N	N	T	T	N	T	T	T	T	A	A	A	T	N	A	N	T	T	A	N	A	A	T	A	A	A	T	A
3857	3857	M3857	SCSC-1_GI_9_1=S	T/C	3	CSC-1_GI_9_1=SCAFFOLD_1977=GI_9_2	14764430	+	C	C	N	C	C	T	C	N	C	C	C	N	T	N	N	T	T	N	T	T	T	T	C	C	C	T	N	C	N	T	T	C	N	C	C	T	C	C	C	T	C
3858	3858	M3858	SCSC-1_GI_9_1=S	C/T	3	CSC-1_GI_9_1=SCAFFOLD_1977=GI_9_2	14779930	+	N	T	N	T	T	C	T	N	T	T	T	N	C	N	N	C	Y	N	C	C	C	C	T	T	T	C	N	T	N	C	C	T	N	T	T	C	T	T	T	C	T
3859	3859	M3859	SCSC-1_GI_9_1=S	G/A	3	CSC-1_GI_9_1=SCAFFOLD_1977=GI_9_2	14811747	+	N	A	N	A	A	G	A	N	A	A	A	N	G	N	N	G	N	N	G	G	G	G	A	A	N	G	N	A	N	G	G	A	N	A	A	G	A	A	A	G	A
3860	3860	M3860	SCSC-1_GI_9_1=S	T/G	3	CSC-1_GI_9_1=SCAFFOLD_1977=GI_9_2	14811776	+	N	G	N	G	G	T	G	N	G	G	G	N	T	N	N	T	N	N	T	T	T	T	G	G	N	T	N	G	N	T	T	G	N	G	G	T	G	G	G	T	G
3861	3861	M3861	SCSC-1_GI_9_1=S	C/T	3	CSC-1_GI_9_1=SCAFFOLD_1977=GI_9_2	14814273	+	N	T	N	T	T	C	T	N	T	T	T	N	C	N	N	C	C	N	C	C	C	C	T	T	T	C	N	T	N	C	C	T	N	T	T	C	T	T	T	C	T
3864	3864	M3864	SCSC-1_GI_9_1=S	G/T	3	CSC-1_GI_9_1=SCAFFOLD_1977=GI_9_2	14831833	+	N	T	N	T	T	G	T	N	T	T	T	N	G	N	N	G	G	N	G	G	G	G	T	T	T	G	N	T	N	G	G	T	N	T	T	G	T	T	G	G	T
3865	3865	M3865	SCSC-1_GI_9_1=S	T/A	3	CSC-1_GI_9_1=SCAFFOLD_1977=GI_9_2	14841604	+	N	A	N	A	A	T	A	N	A	A	A	N	T	N	N	T	T	N	T	T	T	T	A	A	A	T	N	A	N	T	T	A	N	A	A	T	A	A	T	T	A
3866	3866	M3866	SCSC-1_GI_9_1=S	T/C	3	CSC-1_GI_9_1=SCAFFOLD_1977=GI_9_2	14919926	+	N	C	N	C	C	T	C	N	C	C	C	N	T	N	N	T	T	N	T	T	T	T	C	C	C	T	N	C	N	T	T	C	N	C	C	T	C	C	T	T	C
3867	3867	M3867	SCSC-1_GI_9_1=S	T/C	3	CSC-1_GI_9_1=SCAFFOLD_1977=GI_9_2	14938913	+	N	C	N	C	C	T	C	N	C	C	C	N	T	N	N	T	T	N	T	T	T	T	C	C	N	T	N	C	N	T	T	C	T	C	C	T	C	C	T	T	C
3869	3869	M3869	SCSC-1_GI_9_1=S	T/C	3	CSC-1_GI_9_1=SCAFFOLD_1977=GI_9_2	14967513	+	C	C	N	C	C	T	C	N	C	C	C	N	T	N	N	T	T	N	T	T	T	T	C	C	C	T	N	C	N	T	T	C	N	C	C	T	C	C	T	T	C
3871	3871	M3871	SCSC-1_GI_9_1=S	G/A	3	CSC-1_GI_9_1=SCAFFOLD_1977=GI_9_2	15068733	+	A	A	N	A	A	G	G	N	A	A	A	N	G	N	N	G	G	N	G	G	G	G	A	A	N	G	N	A	N	G	G	A	N	A	A	G	A	A	G	G	R
3872	3872	M3872	SCSC-1_GI_9_1=S	C/T	3	CSC-1_GI_9_1=SCAFFOLD_1977=GI_9_2	15069636	+	N	T	N	T	T	C	C	N	T	T	T	N	C	N	N	C	C	N	C	C	C	C	T	T	T	C	N	T	N	C	C	T	N	T	T	C	T	T	C	C	T
3873	3873	M3873	SCSC-1_GI_9_1=S	C/T	3	CSC-1_GI_9_1=SCAFFOLD_1977=GI_9_2	15070240	+	N	C	N	C	C	T	T	N	C	C	C	N	T	N	N	T	T	N	T	T	T	T	C	C	C	T	N	C	N	T	T	C	N	C	C	T	C	C	T	T	C
3874	3874	M3874	SCSC-1_GI_9_1=S	G/A	3	CSC-1_GI_9_1=SCAFFOLD_1977=GI_9_2	15070297	+	N	A	N	A	A	G	G	N	A	A	A	N	G	N	N	G	G	N	G	G	G	G	A	A	A	G	N	A	N	G	G	A	N	A	A	G	A	A	G	G	A
3876	3876	M3876	SCSC-1_GI_9_1=S	T/A	3	CSC-1_GI_9_1=SCAFFOLD_1977=GI_9_2	15142990	+	N	A	N	A	A	T	T	N	A	A	A	N	T	N	N	T	T	N	T	T	T	T	A	A	A	T	N	A	N	T	T	A	N	A	A	T	A	A	T	T	A
3877	3877	M3877	SCSC-1_GI_9_1=S	T/C	3	CSC-1_GI_9_1=SCAFFOLD_1977=GI_9_2	15176483	+	N	T	N	T	T	C	C	N	T	T	T	N	C	N	N	C	C	N	C	C	C	C	T	T	N	C	N	T	N	C	C	T	N	T	T	C	T	T	C	C	T
3878	3878	M3878	SCSC-1_GI_9_1=S	C/G	3	CSC-1_GI_9_1=SCAFFOLD_1977=GI_9_2	15182437	+	N	C	N	C	C	G	G	N	C	C	C	N	G	N	N	G	G	N	G	G	G	G	C	C	C	G	N	C	N	G	G	C	N	C	C	G	C	C	G	G	C
3879	3879	M3879	SCSC-1_GI_9_1=S	G/T	3	CSC-1_GI_9_1=SCAFFOLD_1977=GI_9_2	15182445	+	N	G	N	G	G	T	T	N	G	G	G	N	T	N	N	T	T	N	T	T	T	T	G	G	G	T	N	G	N	T	T	G	N	G	G	T	G	G	T	T	G
3880	3880	M3880	SCSC-1_GI_9_1=S	A/T	3	CSC-1_GI_9_1=SCAFFOLD_1977=GI_9_2	15182456	+	N	A	N	A	A	T	T	N	A	A	A	N	T	N	N	T	T	N	T	T	T	T	A	A	A	T	N	A	N	T	T	A	N	A	A	T	A	A	T	T	A
3881	3881	M3881	SCSC-1_GI_9_1=S	T/A	3	CSC-1_GI_9_1=SCAFFOLD_1977=GI_9_2	15182459	+	N	T	N	T	T	A	A	N	T	T	T	N	A	N	N	A	A	N	A	A	A	A	T	T	T	A	N	T	N	A	A	T	N	T	T	A	T	T	A	A	T
3882	3882	M3882	SCSC-1_GI_9_1=S	A/T	3	CSC-1_GI_9_1=SCAFFOLD_1977=GI_9_2	15213769	+	N	A	N	A	A	T	T	N	A	A	A	N	T	N	N	T	T	N	T	T	T	T	A	A	N	T	N	A	N	T	T	A	N	A	A	T	A	A	T	T	A
3885	3885	M3885	SCSC-1_GI_9_1=S	C/T	3	CSC-1_GI_9_1=SCAFFOLD_1977=GI_9_2	15252831	+	N	C	N	C	C	T	T	N	C	C	T	N	T	N	N	T	T	N	T	T	T	T	C	C	N	T	N	C	N	T	T	C	N	C	C	T	C	C	T	T	C
3886	3886	M3886	SCSC-1_GI_9_1=S	A/G	3	CSC-1_GI_9_1=SCAFFOLD_1977=GI_9_2	15252882	+	N	A	N	A	A	G	G	N	A	A	G	N	G	N	N	G	G	N	G	G	G	G	A	A	N	G	N	A	N	G	G	A	N	A	A	G	A	A	G	G	A
3887	3887	M3887	SCSC-1_GI_9_1=S	G/T	3	CSC-1_GI_9_1=SCAFFOLD_1977=GI_9_2	15252987	+	G	G	N	G	G	T	T	N	G	G	T	N	T	N	N	T	T	N	T	T	T	T	G	G	N	T	N	G	N	T	T	G	N	G	G	T	G	G	T	T	G
3888	3888	M3888	SCSC-1_GI_9_1=S	A/G	3	CSC-1_GI_9_1=SCAFFOLD_1977=GI_9_2	15253011	+	A	A	N	A	A	G	G	N	A	A	G	N	G	N	N	G	G	N	G	G	G	G	A	A	N	G	N	A	N	G	G	A	N	A	A	G	A	A	G	G	A
3889	3889	M3889	SCSC-1_GI_9_1=S	A/T	3	CSC-1_GI_9_1=SCAFFOLD_1977=GI_9_2	15260475	+	A	A	N	A	A	T	T	N	A	A	T	N	T	N	N	T	T	N	T	T	T	T	A	A	A	T	N	A	N	T	T	A	N	A	A	T	A	A	T	T	A
3890	3890	M3890	SCSC-1_GI_9_1=S	A/G	3	CSC-1_GI_9_1=SCAFFOLD_1977=GI_9_2	15327860	+	N	G	N	G	G	A	A	N	G	G	A	N	A	N	N	A	A	N	A	A	A	A	G	G	N	A	N	G	N	A	A	G	N	G	G	A	G	A	A	A	G
3891	3891	M3891	SCSC-1_GI_9_1=S	A/G	3	CSC-1_GI_9_1=SCAFFOLD_1977=GI_9_2	15327864	+	N	G	N	G	G	A	A	N	G	G	A	N	A	N	N	A	A	N	A	A	A	A	G	G	N	A	N	G	N	A	A	G	N	G	G	A	G	A	A	A	G
3892	3892	M3892	SCSC-1_GI_9_1=S	C/T	3	CSC-1_GI_9_1=SCAFFOLD_1977=GI_9_2	15337418	+	N	T	N	T	T	C	C	N	T	N	C	N	C	N	N	C	C	N	C	C	C	C	T	T	N	C	N	T	N	C	C	T	N	T	T	C	N	C	C	C	T
3898	3898	M3898	SCSC-1_GI_9_1=S	G/A	3	CSC-1_GI_9_1=SCAFFOLD_1977=GI_9_2	15338684	+	G	G	N	G	G	A	A	N	G	G	A	N	A	N	N	A	A	N	A	A	A	A	G	G	G	A	N	G	N	A	A	G	N	G	G	A	G	A	A	A	G
3899	3899	M3899	SCSC-1_GI_9_1=S	T/A	3	CSC-1_GI_9_1=SCAFFOLD_1977=GI_9_2	15338699	+	T	T	N	T	T	A	A	N	T	T	A	N	A	N	N	A	A	N	A	A	A	A	T	T	T	A	N	T	N	A	A	T	N	T	T	A	T	A	A	A	T
3900	3900	M3900	SCSC-1_GI_9_1=S	A/G	3	CSC-1_GI_9_1=SCAFFOLD_1977=GI_9_2	15338702	+	A	A	N	A	A	G	G	N	A	A	G	N	G	N	N	G	G	N	G	G	G	G	A	A	A	G	N	A	N	G	G	A	N	A	A	G	A	G	G	G	A
3901	3901	M3901	SCSC-1_GI_9_1=S	A/C	3	CSC-1_GI_9_1=SCAFFOLD_1977=GI_9_2	15338718	+	A	A	N	A	A	C	C	N	A	A	C	N	C	N	N	C	C	N	C	C	C	C	A	A	A	C	N	A	N	C	C	A	N	A	A	C	A	C	C	C	A
3902	3902	M3902	SCSC-1_GI_9_1=S	C/T	3	CSC-1_GI_9_1=SCAFFOLD_1977=GI_9_2	15340408	+	N	T	N	T	T	C	C	N	T	T	C	N	C	C	N	C	C	N	C	C	C	C	T	T	T	C	N	T	N	C	C	T	N	T	T	C	T	C	C	C	T
3903	3903	M3903	SCSC-1_GI_9_1=S	A/C	3	CSC-1_GI_9_1=SCAFFOLD_1977=GI_9_2	15340771	+	A	A	N	A	A	C	C	N	A	A	C	N	C	N	N	C	C	N	C	C	C	C	A	A	A	C	N	A	N	C	C	A	N	A	A	C	A	C	C	C	A
3904	3904	M3904	SCSC-1_GI_9_1=S	A/G	3	CSC-1_GI_9_1=SCAFFOLD_1977=GI_9_2	15346225	+	N	G	N	G	G	A	A	N	G	G	A	N	A	N	N	A	A	N	A	A	A	A	G	G	G	A	N	G	N	A	A	G	N	G	G	A	G	A	A	A	G
3905	3905	M3905	SCSC-1_GI_9_1=S	C/T	3	CSC-1_GI_9_1=SCAFFOLD_1977=GI_9_2	15350537	+	N	T	N	T	T	C	C	N	T	T	C	N	C	N	N	C	C	N	C	C	C	C	T	T	N	C	N	T	N	C	C	T	N	T	T	C	T	C	C	C	T
3906	3906	M3906	SCSC-1_GI_9_1=S	A/T	3	CSC-1_GI_9_1=SCAFFOLD_1977=GI_9_2	15350686	+	N	A	A	A	A	T	T	N	A	A	T	N	T	N	N	T	T	N	T	T	T	T	A	A	A	T	N	A	N	T	T	A	N	A	A	T	A	T	T	T	A
3907	3907	M3907	SCSC-1_GI_9_1=S	G/T	3	CSC-1_GI_9_1=SCAFFOLD_1977=GI_9_2	15350701	+	N	G	G	G	G	T	T	N	G	G	T	N	T	N	N	T	T	N	T	T	T	T	G	G	G	T	N	G	N	T	T	G	N	G	G	T	G	T	T	T	G
3908	3908	M3908	SCSC-1_GI_9_1=S	G/A	3	CSC-1_GI_9_1=SCAFFOLD_1977=GI_9_2	15355648	+	N	A	N	A	A	G	G	N	A	A	G	N	G	N	N	G	G	N	G	G	G	G	A	A	N	G	N	A	N	G	G	A	N	A	A	G	A	G	G	G	A
3909	3909	M3909	SCSC-1_GI_9_1=S	T/C	3	CSC-1_GI_9_1=SCAFFOLD_1977=GI_9_2	15356726	+	N	C	N	C	C	T	T	N	C	C	T	N	T	N	N	T	T	N	T	T	T	T	C	C	C	T	N	C	N	T	T	C	N	C	C	T	C	T	T	T	C
3910	3910	M3910	SCSC-1_GI_9_1=S	C/T	3	CSC-1_GI_9_1=SCAFFOLD_1977=GI_9_2	15356851	+	N	T	N	T	T	C	C	N	T	T	C	N	C	N	N	C	C	N	C	C	C	C	T	T	T	C	N	T	N	C	C	T	N	T	T	C	T	C	C	C	T
3911	3911	M3911	SCSC-1_GI_9_1=S	C/G	3	CSC-1_GI_9_1=SCAFFOLD_1977=GI_9_2	15358584	+	N	G	N	G	G	C	C	N	G	N	C	N	C	C	N	C	C	N	C	C	C	C	G	G	N	C	N	G	N	C	C	G	N	G	G	C	G	C	C	C	G
3912	3912	M3912	SCSC-1_GI_9_1=S	G/C	3	CSC-1_GI_9_1=SCAFFOLD_1977=GI_9_2	15358942	+	N	C	N	C	C	G	G	N	C	C	G	N	G	N	N	G	N	N	G	G	G	G	C	C	N	G	N	C	N	G	G	C	N	C	C	G	C	G	G	G	C
3913	3913	M3913	SCSC-1_GI_9_1=S	T/C	3	CSC-1_GI_9_1=SCAFFOLD_1977=GI_9_2	15358977	+	N	C	N	C	C	T	T	N	C	C	T	N	T	N	N	T	N	N	T	T	T	T	C	C	N	T	N	C	N	T	T	C	N	C	C	T	C	T	T	T	C
3914	3914	M3914	SCSC-1_GI_9_1=S	T/A	3	CSC-1_GI_9_1=SCAFFOLD_1977=GI_9_2	15358982	+	N	A	N	A	A	T	T	N	A	A	T	N	T	N	N	T	N	N	T	T	T	T	A	A	N	T	N	A	N	T	T	A	N	A	A	T	A	T	T	T	A
3915	3915	M3915	SCSC-1_GI_9_1=S	A/G	3	CSC-1_GI_9_1=SCAFFOLD_1977=GI_9_2	15364514	+	N	G	N	G	G	A	A	N	G	G	A	N	A	N	N	A	A	N	A	A	A	A	G	G	N	A	N	G	N	A	A	G	N	G	G	A	G	A	A	A	G
3916	3916	M3916	SCSC-1_GI_9_1=S	G/A	3	CSC-1_GI_9_1=SCAFFOLD_1977=GI_9_2	15407510	+	N	G	N	G	G	A	A	N	G	G	A	N	G	N	N	A	A	N	A	A	A	A	G	G	G	A	N	G	N	A	A	G	N	G	G	A	G	G	A	A	G
3917	3917	M3917	SCSC-1_GI_9_1=S	T/C	3	CSC-1_GI_9_1=SCAFFOLD_1977=GI_9_2	15428633	+	N	T	N	T	T	C	C	N	T	T	C	N	T	N	N	C	C	N	C	C	C	C	T	T	T	C	N	T	N	C	C	T	N	T	T	C	T	T	C	C	T
3918	3918	M3918	SCSC-1_GI_9_1=S	G/C	3	CSC-1_GI_9_1=SCAFFOLD_1977=GI_9_2	15429392	+	N	G	N	G	G	C	C	N	G	G	C	N	G	N	N	C	C	N	C	C	C	C	G	G	N	C	N	G	N	C	C	G	N	G	G	C	G	G	C	C	G
3919	3919	M3919	SCSC-1_GI_9_1=S	A/G	3	CSC-1_GI_9_1=SCAFFOLD_1977=GI_9_2	15429397	+	N	A	N	A	A	G	G	N	A	A	G	N	A	N	N	G	G	N	G	G	G	G	A	A	N	G	N	A	N	G	G	A	N	A	A	G	A	A	G	G	A
3920	3920	M3920	SCSC-1_GI_9_1=S	G/T	3	CSC-1_GI_9_1=SCAFFOLD_1977=GI_9_2	15429407	+	N	G	N	G	G	T	T	N	G	G	T	N	G	N	N	T	T	N	T	T	T	T	G	G	N	T	N	G	N	T	T	G	N	G	G	T	G	G	T	T	G
3924	3924	M3924	SCSC-1_GI_9_1=S	C/A	3	CSC-1_GI_9_1=SCAFFOLD_1977=GI_9_2	15479102	+	N	C	N	C	C	A	A	N	C	C	A	N	C	N	N	A	A	N	A	A	A	A	C	C	N	A	N	C	N	A	A	M	N	C	C	A	C	M	A	A	C
3930	3930	M3930	SCSC-1_GI_9_1=S	T/C	3	CSC-1_GI_9_1=SCAFFOLD_1977=GI_9_2	15482270	+	N	T	N	T	T	C	C	N	T	T	C	N	T	N	N	C	C	N	C	C	C	C	T	T	N	C	N	T	N	C	C	T	N	T	T	C	T	T	C	C	T
3931	3931	M3931	SCSC-1_GI_9_1=S	A/G	3	CSC-1_GI_9_1=SCAFFOLD_1977=GI_9_2	15549776	+	N	A	N	A	A	G	G	N	A	A	G	N	A	N	N	G	G	N	G	G	G	G	A	G	A	G	N	A	N	A	G	A	N	A	G	G	A	A	G	G	A
3932	3932	M3932	SCSC-1_GI_9_1=S	C/T	3	CSC-1_GI_9_1=SCAFFOLD_1977=GI_9_2	15577009	+	N	T	N	T	C	C	C	N	T	T	C	N	T	N	N	C	C	N	C	C	C	C	T	C	T	C	N	T	N	T	C	T	N	T	C	C	T	T	C	C	T
3933	3933	M3933	SCSC-1_GI_9_1=S	C/T	3	CSC-1_GI_9_1=SCAFFOLD_1977=GI_9_2	15577095	+	N	C	N	C	T	T	T	N	C	C	T	N	C	N	N	T	T	N	T	T	T	T	C	T	C	T	N	C	N	C	T	C	N	C	T	T	C	C	T	T	C
3934	3934	M3934	SCSC-1_GI_9_1=S	C/T	3	CSC-1_GI_9_1=SCAFFOLD_1977=GI_9_2	15577101	+	N	T	N	T	C	C	C	N	T	T	C	N	T	N	N	C	C	N	C	C	C	C	T	C	T	C	N	T	N	T	C	T	N	T	C	C	T	T	C	C	T
3935	3935	M3935	SCSC-1_GI_9_1=S	A/G	3	CSC-1_GI_9_1=SCAFFOLD_1977=GI_9_2	15577128	+	N	A	N	A	G	G	G	N	A	A	G	N	A	N	N	G	G	N	G	G	G	G	A	G	A	G	N	A	N	A	G	A	N	A	G	G	A	A	G	G	A
3937	3937	M3937	SCSC-1_GI_9_1=S	A/G	3	CSC-1_GI_9_1=SCAFFOLD_1977=GI_9_2	15615369	+	N	G	N	G	A	G	A	N	G	G	A	N	G	N	N	A	A	N	A	A	A	A	G	A	N	A	N	A	N	G	A	G	N	G	A	A	G	G	A	A	G
3938	3938	M3938	SCSC-1_GI_9_1=S	C/T	3	CSC-1_GI_9_1=SCAFFOLD_1977=GI_9_2	15660072	+	N	T	N	T	C	T	C	N	T	T	C	N	T	N	N	C	C	N	C	C	C	C	T	C	N	C	N	C	N	T	C	T	N	T	C	C	T	T	C	C	T
3939	3939	M3939	SCSC-1_GI_9_1=S	A/C	3	CSC-1_GI_9_1=SCAFFOLD_1977=GI_9_2	15660123	+	N	C	N	C	A	C	A	N	C	C	A	N	C	N	N	A	A	N	A	A	A	A	C	A	N	A	N	A	N	C	A	C	N	C	A	A	C	C	A	A	C
3940	3940	M3940	SCSC-1_GI_9_1=S	T/C	3	CSC-1_GI_9_1=SCAFFOLD_1977=GI_9_2	15700284	+	N	C	N	C	T	C	T	N	C	C	T	N	C	N	N	T	T	N	T	T	T	T	C	T	N	T	N	T	N	C	T	C	N	C	T	T	C	C	T	T	C
3945	3945	M3945	SCSC-1_GI_9_1=S	A/G	3	CSC-1_GI_9_1=SCAFFOLD_1977=GI_9_2	15777272	+	N	G	N	G	A	G	R	N	G	G	A	N	G	N	N	A	A	N	A	A	A	A	G	A	G	A	N	A	N	G	A	G	N	G	A	A	G	G	A	A	G
3946	3946	M3946	SCSC-1_GI_9_1=S	G/A	3	CSC-1_GI_9_1=SCAFFOLD_1977=GI_9_2	15885749	+	N	A	N	A	G	A	R	N	A	A	G	N	A	N	N	G	G	N	G	G	G	G	A	G	N	G	N	G	N	A	G	A	N	A	G	G	A	A	G	G	A
3947	3947	M3947	SCSC-1_GI_9_1=S	A/G	3	CSC-1_GI_9_1=SCAFFOLD_1977=GI_9_2	15885755	+	N	G	N	G	A	G	R	N	G	G	A	N	G	N	N	A	A	N	A	A	A	A	G	A	N	A	N	A	N	G	A	G	N	G	A	A	G	G	A	A	G
3948	3948	M3948	SCSC-1_GI_9_1=S	A/C	3	CSC-1_GI_9_1=SCAFFOLD_1977=GI_9_2	15885861	+	N	C	N	C	A	C	M	N	C	C	A	N	C	N	N	A	A	N	A	A	A	A	C	A	N	A	N	A	N	C	A	C	N	C	A	A	C	C	A	A	C
3949	3949	M3949	SCSC-1_GI_9_1=S	A/G	3	CSC-1_GI_9_1=SCAFFOLD_1977=GI_9_2	15885903	+	N	G	N	G	A	G	R	N	G	G	A	N	G	N	N	A	A	N	A	A	A	A	G	A	N	A	N	A	N	G	A	G	N	G	A	A	G	G	A	A	G
3950	3950	M3950	SCSC-1_GI_9_1=S	A/T	3	CSC-1_GI_9_1=SCAFFOLD_1977=GI_9_2	15971871	+	N	T	N	T	A	T	A	N	T	T	A	N	T	N	N	A	A	N	A	A	A	A	T	A	N	A	N	A	N	T	A	T	N	T	A	A	T	T	A	A	T
3951	3951	M3951	SCSC-1_GI_9_1=S	C/G	3	CSC-1_GI_9_1=SCAFFOLD_1977=GI_9_2	15995848	+	N	G	C	G	C	G	C	N	G	G	C	N	G	N	N	G	N	N	C	C	C	C	G	C	G	C	N	C	N	G	C	G	N	G	C	C	G	G	C	C	G
3952	3952	M3952	SCSC-1_GI_9_1=S	G/A	3	CSC-1_GI_9_1=SCAFFOLD_1977=GI_9_2	15995849	+	N	A	G	A	G	A	G	N	A	A	G	N	A	N	N	A	N	N	G	G	G	G	A	G	A	G	N	G	N	A	G	A	N	A	G	G	A	A	G	G	A
3953	3953	M3953	SCSC-1_GI_9_1=S	T/G	3	CSC-1_GI_9_1=SCAFFOLD_1977=GI_9_2	15995859	+	N	G	T	G	T	G	T	N	G	G	T	N	G	N	N	G	N	N	T	T	T	T	G	T	G	T	N	T	N	G	T	G	N	G	T	T	G	G	T	T	G
3954	3954	M3954	SCSC-1_GI_9_1=S	G/C	3	CSC-1_GI_9_1=SCAFFOLD_1977=GI_9_2	16050493	+	N	C	N	C	G	C	G	N	C	C	G	N	C	N	N	C	G	N	G	G	G	G	C	G	C	G	N	G	N	C	G	C	N	S	G	G	C	C	G	G	C
3955	3955	M3955	SCSC-1_GI_9_1=S	G/C	3	CSC-1_GI_9_1=SCAFFOLD_1977=GI_9_2	16053845	+	N	C	N	C	G	C	G	N	C	C	G	N	C	N	N	C	G	N	G	G	G	G	C	G	C	G	N	G	N	C	G	C	N	S	G	G	C	C	G	G	C
3956	3956	M3956	SCSC-1_GI_9_1=S	T/C	3	CSC-1_GI_9_1=SCAFFOLD_1977=GI_9_2	16053955	+	N	C	N	C	T	C	T	N	C	C	T	N	C	N	N	C	T	N	T	T	T	T	C	T	N	T	N	T	N	C	T	C	N	C	T	T	C	C	T	T	C
3957	3957	M3957	SCSC-1_GI_9_1=S	A/G	3	CSC-1_GI_9_1=SCAFFOLD_1977=GI_9_2	16076375	+	N	G	N	G	A	G	A	N	G	G	A	N	G	N	N	G	A	N	A	A	A	A	G	A	G	A	N	A	N	G	A	G	N	R	A	A	G	G	A	A	G
3958	3958	M3958	SCSC-1_GI_9_1=S	C/A	3	CSC-1_GI_9_1=SCAFFOLD_1977=GI_9_2	16097032	+	N	A	N	A	C	A	C	N	A	A	C	N	A	N	C	A	C	N	C	C	C	C	A	C	A	C	N	C	N	A	C	A	N	M	C	C	A	A	C	C	A
3960	3960	M3960	SCSC-1_GI_9_1=S	G/A	3	CSC-1_GI_9_1=SCAFFOLD_1977=GI_9_2	16103518	+	N	A	N	A	G	A	G	N	A	A	G	N	A	N	N	A	G	N	G	G	G	G	A	G	A	G	N	G	N	A	G	A	N	R	G	G	A	A	G	G	A
3961	3961	M3961	SCSC-1_GI_9_1=S	T/C	3	CSC-1_GI_9_1=SCAFFOLD_1977=GI_9_2	16104374	+	N	C	N	C	T	C	T	N	C	C	T	N	C	N	N	C	T	N	T	T	T	T	C	T	C	T	N	T	N	C	T	C	N	C	T	T	C	C	T	T	C
3962	3962	M3962	SCSC-1_GI_9_1=S	T/C	3	CSC-1_GI_9_1=SCAFFOLD_1977=GI_9_2	16104426	+	N	C	N	C	T	C	T	N	C	C	T	N	C	N	N	C	T	N	T	T	T	T	C	T	C	T	N	T	N	C	T	C	N	C	T	T	C	C	T	T	C
3964	3964	M3964	SCSC-1_GI_9_1=S	A/G	3	CSC-1_GI_9_1=SCAFFOLD_1977=GI_9_2	16109848	+	N	G	N	G	A	G	A	N	G	G	A	N	G	N	N	G	A	N	A	A	A	A	G	A	N	A	N	A	N	G	A	G	N	R	A	A	G	G	A	A	G
3965	3965	M3965	SCSC-1_GI_9_1=S	G/A	3	CSC-1_GI_9_1=SCAFFOLD_1977=GI_9_2	16109968	+	N	A	N	A	G	A	G	N	A	A	G	N	A	N	N	A	G	N	G	G	G	G	A	G	N	G	N	G	N	A	G	A	N	R	G	G	A	A	G	G	A
3967	3967	M3967	SCSC-1_GI_9_1=S	C/T	3	CSC-1_GI_9_1=SCAFFOLD_1977=GI_9_2	16111340	+	N	T	N	T	C	T	C	N	T	T	C	N	T	N	N	T	C	N	C	C	C	C	T	C	N	C	N	C	N	T	C	T	N	Y	C	C	T	T	C	C	T
3968	3968	M3968	SCSC-1_GI_9_1=S	A/G	3	CSC-1_GI_9_1=SCAFFOLD_1977=GI_9_2	16111355	+	N	G	N	G	A	G	A	N	G	G	A	N	G	N	N	G	A	N	A	A	A	A	G	A	N	A	N	A	N	G	A	G	N	R	A	A	G	G	A	A	G
3969	3969	M3969	SCSC-1_GI_9_1=S	A/C	3	CSC-1_GI_9_1=SCAFFOLD_1977=GI_9_2	16111373	+	N	C	N	C	A	C	A	N	C	C	A	N	C	N	N	C	A	N	A	A	A	A	C	A	N	A	N	A	N	C	A	C	N	M	A	A	C	C	A	A	C
3970	3970	M3970	SCSC-1_GI_9_1=S	G/A	3	CSC-1_GI_9_1=SCAFFOLD_1977=GI_9_2	16111454	+	N	A	N	A	G	A	G	N	A	A	G	N	A	N	N	A	G	N	G	G	G	G	A	G	N	G	N	G	N	A	G	A	N	A	G	G	A	A	G	G	A
3971	3971	M3971	SCSC-1_GI_9_1=S	A/C	3	CSC-1_GI_9_1=SCAFFOLD_1977=GI_9_2	16111475	+	N	C	N	C	A	C	A	N	C	C	A	N	C	N	N	C	A	N	A	A	A	A	C	A	N	A	N	A	N	C	A	C	N	C	A	A	C	C	A	A	C
3972	3972	M3972	SCSC-1_GI_9_1=S	G/A	3	CSC-1_GI_9_1=SCAFFOLD_1977=GI_9_2	16111586	+	A	A	N	A	G	A	G	N	A	A	G	N	A	N	N	A	G	N	G	G	G	G	A	G	N	G	N	G	N	A	G	A	N	R	G	G	A	A	G	G	A
3973	3973	M3973	SCSC-1_GI_9_1=S	C/T	3	CSC-1_GI_9_1=SCAFFOLD_1977=GI_9_2	16123288	+	N	T	N	T	C	T	C	N	T	T	C	N	T	N	N	T	C	N	C	C	C	C	T	C	T	C	N	C	N	T	C	T	N	Y	C	C	T	T	C	C	T
3974	3974	M3974	SCSC-1_GI_9_1=S	C/T	3	CSC-1_GI_9_1=SCAFFOLD_1977=GI_9_2	16123309	+	N	T	N	T	C	T	C	N	T	T	C	N	T	N	N	T	C	N	C	C	C	C	T	C	N	C	N	C	N	T	C	T	N	Y	C	C	T	T	C	C	T
3975	3975	M3975	SCSC-1_GI_9_1=S	G/A	3	CSC-1_GI_9_1=SCAFFOLD_1977=GI_9_2	16123321	+	N	A	N	A	G	A	G	N	A	A	G	N	A	N	N	A	G	N	G	G	G	G	A	G	N	G	N	G	N	A	G	A	N	R	G	G	A	A	G	G	A
3977	3977	M3977	SCSC-1_GI_9_1=S	T/C	3	CSC-1_GI_9_1=SCAFFOLD_1977=GI_9_2	16157109	+	C	C	N	C	T	C	T	N	C	C	T	N	C	N	N	C	T	N	T	T	T	T	C	T	C	T	N	T	N	C	T	C	N	Y	T	T	C	C	T	T	C
3979	3979	M3979	SCSC-1_GI_9_1=S	C/A	3	CSC-1_GI_9_1=SCAFFOLD_1977=GI_9_2	16158244	+	N	A	N	A	C	A	C	N	A	N	C	N	A	N	N	A	C	N	C	C	C	C	A	C	A	C	N	C	N	A	C	A	N	M	C	C	A	A	C	C	A
3980	3980	M3980	SCSC-1_GI_9_1=S	G/C	3	CSC-1_GI_9_1=SCAFFOLD_1977=GI_9_2	16158396	+	N	C	N	C	G	C	G	N	C	C	G	N	C	N	N	C	G	N	G	G	G	G	C	G	N	G	N	G	N	C	G	C	N	S	G	G	C	C	G	G	C
3981	3981	M3981	SCSC-1_GI_9_1=S	C/T	3	CSC-1_GI_9_1=SCAFFOLD_1977=GI_9_2	16158408	+	N	T	N	T	C	T	C	N	T	T	C	N	T	N	N	T	C	N	C	C	C	C	T	C	N	C	N	C	N	T	C	T	N	Y	C	C	T	T	C	C	T
3982	3982	M3982	SCSC-1_GI_9_1=S	C/T	3	CSC-1_GI_9_1=SCAFFOLD_1977=GI_9_2	16158425	+	N	T	N	T	C	T	C	N	T	T	C	N	T	N	N	T	C	N	C	C	C	C	T	C	N	C	N	C	N	T	C	T	N	Y	C	C	T	T	C	C	T
3983	3983	M3983	SCSC-1_GI_9_1=S	G/T	3	CSC-1_GI_9_1=SCAFFOLD_1977=GI_9_2	16158426	+	N	T	N	T	G	T	G	N	T	T	G	N	T	N	N	T	G	N	G	G	G	G	T	G	N	G	N	G	N	T	G	T	N	K	G	G	T	T	G	G	T
3984	3984	M3984	SCSC-1_GI_9_1=S	C/T	3	CSC-1_GI_9_1=SCAFFOLD_1977=GI_9_2	16158493	+	N	T	N	T	C	T	C	N	T	T	C	N	T	N	N	T	C	N	C	C	C	C	T	C	T	C	N	C	N	T	C	T	N	Y	C	C	T	T	C	C	T
3985	3985	M3985	SCSC-1_GI_9_1=S	G/A	3	CSC-1_GI_9_1=SCAFFOLD_1977=GI_9_2	16198594	+	A	A	N	A	G	A	G	N	A	N	G	N	A	N	N	A	G	N	G	G	G	G	A	G	A	G	N	G	N	A	G	A	N	R	G	G	A	A	G	G	A
3989	3989	M3989	SCSC-1_GI_9_1=S	G/A	3	CSC-1_GI_9_1=SCAFFOLD_1977=GI_9_2	16276529	+	N	A	N	A	G	A	G	N	A	A	G	N	A	N	N	A	G	N	G	A	G	G	A	G	A	G	N	G	N	A	G	G	N	R	G	G	A	A	G	G	A
3991	3991	M3991	SCSC-1_GI_9_1=S	T/C	3	CSC-1_GI_9_1=SCAFFOLD_1977=GI_9_2	16400546	+	N	C	N	C	T	C	T	N	C	C	T	N	C	N	N	C	T	N	T	C	T	T	C	T	N	T	N	T	N	C	T	T	N	Y	T	T	C	C	T	T	C
3992	3992	M3992	SCSC-1_GI_9_1=S	A/C	3	CSC-1_GI_9_1=SCAFFOLD_1977=GI_9_2	16461466	+	N	C	N	C	A	C	A	N	C	C	A	N	C	N	N	C	A	N	A	C	A	A	C	A	N	A	N	A	N	C	A	A	N	M	A	A	C	C	A	A	C
4097	4097	M4097	SCSC-22_SCAFFOL	A/T	3	CSC-22_SCAFFOLD_2028=SCAFFOLD_129	127029	+	N	A	N	A	A	A	T	N	A	A	A	N	A	N	N	A	N	N	T	A	T	A	A	A	N	T	N	A	N	A	A	T	N	T	A	W	T	A	A	T	A
4206	4206	M4206	SCSC-22_SCAFFOL	G/A	3	CSC-22_SCAFFOLD_2028=SCAFFOLD_129	267954	+	N	A	N	G	G	A	G	N	A	G	G	N	A	N	N	A	G	N	A	G	A	G	N	A	N	G	N	A	N	A	G	G	N	G	G	A	G	A	A	A	A
5556	5556	M5556	SCSC-2_GI_5_1=S	G/A	3	CSC-2_GI_5_1=SCAFFOLD_408=GI_5_2=SCAFFOLD_435=GI_5_3=SCAFFOLD_2402=SCAFFOLD_2024=GI_5_4	69416	+	N	G	N	A	A	A	G	N	A	G	A	N	A	N	N	G	A	N	G	A	A	A	A	A	N	A	N	G	N	G	A	G	N	A	A	G	G	A	A	A	G
5557	5557	M5557	SCSC-2_GI_5_1=S	C/G	3	CSC-2_GI_5_1=SCAFFOLD_408=GI_5_2=SCAFFOLD_435=GI_5_3=SCAFFOLD_2402=SCAFFOLD_2024=GI_5_4	128432	+	N	C	N	G	G	G	C	N	G	C	G	N	G	N	N	C	G	N	C	G	G	G	G	G	C	G	N	C	N	C	G	C	N	G	G	C	C	G	G	G	C
5558	5558	M5558	SCSC-2_GI_5_1=S	T/C	3	CSC-2_GI_5_1=SCAFFOLD_408=GI_5_2=SCAFFOLD_435=GI_5_3=SCAFFOLD_2402=SCAFFOLD_2024=GI_5_4	143859	+	C	T	N	C	C	C	T	N	C	T	C	N	C	N	N	T	C	N	T	C	C	C	C	C	T	C	N	T	N	T	C	T	N	C	C	T	T	C	C	C	T
5559	5559	M5559	SCSC-2_GI_5_1=S	C/T	3	CSC-2_GI_5_1=SCAFFOLD_408=GI_5_2=SCAFFOLD_435=GI_5_3=SCAFFOLD_2402=SCAFFOLD_2024=GI_5_4	176089	+	N	C	N	T	T	T	C	N	T	C	T	N	T	N	N	C	T	N	C	T	T	T	T	T	C	T	N	C	N	C	T	C	N	T	T	C	C	T	T	T	C
5562	5562	M5562	SCSC-2_GI_5_1=S	A/G	3	CSC-2_GI_5_1=SCAFFOLD_408=GI_5_2=SCAFFOLD_435=GI_5_3=SCAFFOLD_2402=SCAFFOLD_2024=GI_5_4	189305	+	N	A	N	G	G	G	A	N	G	A	G	N	G	N	N	A	G	N	A	G	G	G	G	G	N	G	N	A	N	A	G	A	N	G	G	A	A	G	G	G	A
5563	5563	M5563	SCSC-2_GI_5_1=S	G/A	3	CSC-2_GI_5_1=SCAFFOLD_408=GI_5_2=SCAFFOLD_435=GI_5_3=SCAFFOLD_2402=SCAFFOLD_2024=GI_5_4	217263	+	A	G	N	A	A	A	G	N	A	G	A	N	A	N	N	G	A	N	G	A	A	A	A	A	N	A	N	G	N	G	A	G	N	A	A	G	G	A	A	A	G
5564	5564	M5564	SCSC-2_GI_5_1=S	A/G	3	CSC-2_GI_5_1=SCAFFOLD_408=GI_5_2=SCAFFOLD_435=GI_5_3=SCAFFOLD_2402=SCAFFOLD_2024=GI_5_4	217278	+	G	A	N	G	G	G	A	N	G	A	G	N	G	N	N	A	G	N	A	G	G	G	G	G	A	G	N	A	N	A	G	A	N	G	G	A	A	G	G	G	A
5565	5565	M5565	SCSC-2_GI_5_1=S	T/A	3	CSC-2_GI_5_1=SCAFFOLD_408=GI_5_2=SCAFFOLD_435=GI_5_3=SCAFFOLD_2402=SCAFFOLD_2024=GI_5_4	217314	+	N	T	N	A	A	A	T	N	A	T	A	N	A	N	N	T	A	N	T	A	A	A	A	A	T	A	N	T	N	T	A	T	N	A	A	T	T	A	A	A	T
5570	5570	M5570	SCSC-2_GI_5_1=S	G/T	3	CSC-2_GI_5_1=SCAFFOLD_408=GI_5_2=SCAFFOLD_435=GI_5_3=SCAFFOLD_2402=SCAFFOLD_2024=GI_5_4	358949	+	N	T	N	G	G	G	T	N	G	N	G	N	G	N	N	G	G	N	T	G	G	G	G	G	N	G	N	T	N	T	G	T	N	G	G	T	T	G	G	G	T
5572	5572	M5572	SCSC-2_GI_5_1=S	A/G	3	CSC-2_GI_5_1=SCAFFOLD_408=GI_5_2=SCAFFOLD_435=GI_5_3=SCAFFOLD_2402=SCAFFOLD_2024=GI_5_4	462071	+	N	A	N	G	G	G	A	N	G	A	G	N	G	N	N	G	G	N	A	G	G	G	G	G	A	G	N	A	N	G	G	A	N	G	G	A	A	G	G	G	A
5573	5573	M5573	SCSC-2_GI_5_1=S	T/A	3	CSC-2_GI_5_1=SCAFFOLD_408=GI_5_2=SCAFFOLD_435=GI_5_3=SCAFFOLD_2402=SCAFFOLD_2024=GI_5_4	515096	+	A	T	N	A	A	A	T	N	A	T	A	N	A	N	N	W	A	N	T	A	A	A	A	A	N	A	N	T	N	A	A	T	N	A	A	T	T	A	A	A	T
5576	5576	M5576	SCSC-2_GI_5_1=S	T/C	3	CSC-2_GI_5_1=SCAFFOLD_408=GI_5_2=SCAFFOLD_435=GI_5_3=SCAFFOLD_2402=SCAFFOLD_2024=GI_5_4	604449	+	N	T	N	C	C	C	T	N	C	T	C	N	C	N	N	C	C	N	T	C	C	C	T	C	T	C	N	T	N	C	C	T	N	C	C	T	T	C	C	C	T
5577	5577	M5577	SCSC-2_GI_5_1=S	T/G	3	CSC-2_GI_5_1=SCAFFOLD_408=GI_5_2=SCAFFOLD_435=GI_5_3=SCAFFOLD_2402=SCAFFOLD_2024=GI_5_4	627931	+	N	T	N	G	G	G	T	N	G	T	G	N	G	N	N	G	G	N	T	G	G	G	T	G	N	G	N	T	N	G	G	T	N	G	G	T	T	G	G	G	T
5578	5578	M5578	SCSC-2_GI_5_1=S	T/G	3	CSC-2_GI_5_1=SCAFFOLD_408=GI_5_2=SCAFFOLD_435=GI_5_3=SCAFFOLD_2402=SCAFFOLD_2024=GI_5_4	628023	+	N	T	N	G	G	G	T	N	G	T	G	N	G	N	N	G	G	N	T	G	G	G	T	G	T	G	N	T	N	G	G	T	N	G	G	T	T	G	G	G	T
5579	5579	M5579	SCSC-2_GI_5_1=S	G/T	3	CSC-2_GI_5_1=SCAFFOLD_408=GI_5_2=SCAFFOLD_435=GI_5_3=SCAFFOLD_2402=SCAFFOLD_2024=GI_5_4	628080	+	N	G	N	T	T	T	G	N	T	G	T	N	T	N	N	T	T	N	G	T	T	T	G	T	G	T	N	G	N	T	T	G	N	T	T	G	G	T	T	T	G
5580	5580	M5580	SCSC-2_GI_5_1=S	A/C	3	CSC-2_GI_5_1=SCAFFOLD_408=GI_5_2=SCAFFOLD_435=GI_5_3=SCAFFOLD_2402=SCAFFOLD_2024=GI_5_4	671655	+	N	C	N	A	A	A	C	N	A	C	A	N	A	N	N	A	A	N	C	A	A	A	C	A	C	A	N	C	N	A	A	C	N	A	C	C	C	A	A	A	C
5582	5582	M5582	SCSC-2_GI_5_1=S	C/G	3	CSC-2_GI_5_1=SCAFFOLD_408=GI_5_2=SCAFFOLD_435=GI_5_3=SCAFFOLD_2402=SCAFFOLD_2024=GI_5_4	676347	+	N	G	N	C	C	C	G	N	C	G	C	N	C	N	N	C	C	N	G	C	C	C	G	C	G	C	N	G	N	C	C	G	N	C	G	G	G	C	C	C	G
5583	5583	M5583	SCSC-2_GI_5_1=S	C/T	3	CSC-2_GI_5_1=SCAFFOLD_408=GI_5_2=SCAFFOLD_435=GI_5_3=SCAFFOLD_2402=SCAFFOLD_2024=GI_5_4	718632	+	N	T	N	C	C	C	T	N	C	T	C	N	C	N	N	C	C	N	T	C	C	C	T	C	N	C	N	T	N	C	C	T	N	C	T	T	T	C	C	C	T
5584	5584	M5584	SCSC-2_GI_5_1=S	C/T	3	CSC-2_GI_5_1=SCAFFOLD_408=GI_5_2=SCAFFOLD_435=GI_5_3=SCAFFOLD_2402=SCAFFOLD_2024=GI_5_4	719492	+	T	T	N	C	C	C	T	N	C	T	C	N	C	N	N	C	C	N	T	C	C	C	T	C	N	C	N	T	N	C	C	T	N	C	T	T	T	C	C	C	T
5585	5585	M5585	SCSC-2_GI_5_1=S	G/A	3	CSC-2_GI_5_1=SCAFFOLD_408=GI_5_2=SCAFFOLD_435=GI_5_3=SCAFFOLD_2402=SCAFFOLD_2024=GI_5_4	725295	+	A	A	G	G	G	G	A	N	G	A	G	N	G	N	N	G	G	N	A	G	G	G	A	G	A	G	N	A	N	G	G	A	N	G	A	A	A	G	G	G	A
5586	5586	M5586	SCSC-2_GI_5_1=S	A/G	3	CSC-2_GI_5_1=SCAFFOLD_408=GI_5_2=SCAFFOLD_435=GI_5_3=SCAFFOLD_2402=SCAFFOLD_2024=GI_5_4	725346	+	G	G	A	A	A	A	G	N	A	G	A	N	A	N	N	A	A	N	G	A	A	A	G	A	G	A	N	G	N	A	A	G	N	A	G	G	G	A	A	A	G
5587	5587	M5587	SCSC-2_GI_5_1=S	C/T	3	CSC-2_GI_5_1=SCAFFOLD_408=GI_5_2=SCAFFOLD_435=GI_5_3=SCAFFOLD_2402=SCAFFOLD_2024=GI_5_4	725463	+	N	T	N	C	C	C	T	N	C	T	C	N	C	N	N	C	C	N	T	C	C	C	T	C	N	C	N	T	N	C	C	T	T	C	T	T	T	C	C	C	T
5588	5588	M5588	SCSC-2_GI_5_1=S	A/G	3	CSC-2_GI_5_1=SCAFFOLD_408=GI_5_2=SCAFFOLD_435=GI_5_3=SCAFFOLD_2402=SCAFFOLD_2024=GI_5_4	725466	+	N	G	N	A	A	A	G	N	A	G	A	N	A	N	N	A	A	N	G	A	A	A	G	A	N	A	N	G	N	A	A	G	G	A	G	G	G	A	A	A	G
5589	5589	M5589	SCSC-2_GI_5_1=S	C/T	3	CSC-2_GI_5_1=SCAFFOLD_408=GI_5_2=SCAFFOLD_435=GI_5_3=SCAFFOLD_2402=SCAFFOLD_2024=GI_5_4	807400	+	N	T	N	C	C	C	T	N	C	T	C	N	C	N	N	C	C	N	T	C	C	C	T	C	T	C	N	T	N	C	C	T	N	C	T	T	T	C	C	C	T
5590	5590	M5590	SCSC-2_GI_5_1=S	G/T	3	CSC-2_GI_5_1=SCAFFOLD_408=GI_5_2=SCAFFOLD_435=GI_5_3=SCAFFOLD_2402=SCAFFOLD_2024=GI_5_4	829348	+	N	T	N	G	G	G	T	N	G	T	G	N	G	N	N	G	G	N	T	G	G	G	T	G	N	G	N	T	N	G	G	T	N	G	T	T	T	G	G	G	T
5591	5591	M5591	SCSC-2_GI_5_1=S	T/C	3	CSC-2_GI_5_1=SCAFFOLD_408=GI_5_2=SCAFFOLD_435=GI_5_3=SCAFFOLD_2402=SCAFFOLD_2024=GI_5_4	829403	+	N	C	N	T	T	T	C	N	T	C	T	N	T	N	N	T	T	N	C	T	T	T	C	T	N	T	N	C	N	T	T	C	N	T	C	C	C	T	T	T	C
5592	5592	M5592	SCSC-2_GI_5_1=S	G/A	3	CSC-2_GI_5_1=SCAFFOLD_408=GI_5_2=SCAFFOLD_435=GI_5_3=SCAFFOLD_2402=SCAFFOLD_2024=GI_5_4	829914	+	N	A	N	G	G	G	A	N	G	A	G	N	G	N	N	G	G	N	A	G	G	G	A	G	N	G	N	A	N	G	G	A	N	G	A	A	A	G	G	G	A
5593	5593	M5593	SCSC-2_GI_5_1=S	G/A	3	CSC-2_GI_5_1=SCAFFOLD_408=GI_5_2=SCAFFOLD_435=GI_5_3=SCAFFOLD_2402=SCAFFOLD_2024=GI_5_4	829938	+	N	A	N	G	G	G	A	N	G	A	G	N	G	N	N	G	G	N	A	G	G	G	A	G	N	G	N	A	N	G	G	A	N	G	A	A	A	G	G	G	A
5594	5594	M5594	SCSC-2_GI_5_1=S	A/T	3	CSC-2_GI_5_1=SCAFFOLD_408=GI_5_2=SCAFFOLD_435=GI_5_3=SCAFFOLD_2402=SCAFFOLD_2024=GI_5_4	833014	+	N	T	N	A	A	A	T	N	A	T	A	N	A	N	N	A	A	N	T	A	A	A	T	A	T	A	N	T	N	A	A	T	N	A	T	T	T	A	A	A	T
5595	5595	M5595	SCSC-2_GI_5_1=S	G/A	3	CSC-2_GI_5_1=SCAFFOLD_408=GI_5_2=SCAFFOLD_435=GI_5_3=SCAFFOLD_2402=SCAFFOLD_2024=GI_5_4	833047	+	N	A	N	G	G	G	A	N	G	A	G	N	G	N	N	G	G	N	A	G	G	G	A	G	N	G	N	A	N	G	G	A	N	G	A	A	A	G	G	G	A
5596	5596	M5596	SCSC-2_GI_5_1=S	T/C	3	CSC-2_GI_5_1=SCAFFOLD_408=GI_5_2=SCAFFOLD_435=GI_5_3=SCAFFOLD_2402=SCAFFOLD_2024=GI_5_4	833080	+	N	C	N	T	T	T	C	N	T	C	T	N	T	N	N	T	T	N	C	T	T	T	C	T	N	T	N	C	N	T	T	C	N	T	C	C	C	T	T	T	C
5597	5597	M5597	SCSC-2_GI_5_1=S	A/G	3	CSC-2_GI_5_1=SCAFFOLD_408=GI_5_2=SCAFFOLD_435=GI_5_3=SCAFFOLD_2402=SCAFFOLD_2024=GI_5_4	833092	+	N	G	N	A	A	A	G	N	A	G	A	N	A	N	N	A	A	N	G	A	A	A	G	A	N	A	N	G	N	A	A	G	N	A	G	G	G	A	A	A	G
5598	5598	M5598	SCSC-2_GI_5_1=S	C/A	3	CSC-2_GI_5_1=SCAFFOLD_408=GI_5_2=SCAFFOLD_435=GI_5_3=SCAFFOLD_2402=SCAFFOLD_2024=GI_5_4	833170	+	N	A	N	C	C	C	A	N	C	A	C	N	C	N	N	C	C	N	A	C	C	C	A	C	A	C	N	A	N	C	C	A	N	C	A	A	A	C	C	C	A
5599	5599	M5599	SCSC-2_GI_5_1=S	G/T	3	CSC-2_GI_5_1=SCAFFOLD_408=GI_5_2=SCAFFOLD_435=GI_5_3=SCAFFOLD_2402=SCAFFOLD_2024=GI_5_4	833210	+	N	T	N	G	G	G	T	N	G	T	G	N	G	N	N	G	G	N	T	G	G	G	T	G	T	G	N	T	N	G	G	T	N	G	T	T	T	G	G	G	T
5600	5600	M5600	SCSC-2_GI_5_1=S	A/G	3	CSC-2_GI_5_1=SCAFFOLD_408=GI_5_2=SCAFFOLD_435=GI_5_3=SCAFFOLD_2402=SCAFFOLD_2024=GI_5_4	836675	+	N	G	A	A	A	A	G	N	A	G	A	N	A	N	N	A	N	N	G	A	A	A	G	A	N	A	N	G	N	A	A	G	N	A	G	G	G	A	A	A	G
5601	5601	M5601	SCSC-2_GI_5_1=S	C/G	3	CSC-2_GI_5_1=SCAFFOLD_408=GI_5_2=SCAFFOLD_435=GI_5_3=SCAFFOLD_2402=SCAFFOLD_2024=GI_5_4	837414	+	N	G	N	C	C	C	G	N	C	G	C	N	C	N	N	C	N	N	G	C	C	C	G	C	N	C	N	G	N	C	C	G	N	C	G	G	G	C	C	C	G
5602	5602	M5602	SCSC-2_GI_5_1=S	A/G	3	CSC-2_GI_5_1=SCAFFOLD_408=GI_5_2=SCAFFOLD_435=GI_5_3=SCAFFOLD_2402=SCAFFOLD_2024=GI_5_4	896702	+	N	G	N	A	A	A	G	N	A	G	A	N	A	N	N	A	A	N	G	A	A	A	G	A	N	A	N	G	N	A	A	G	N	A	G	G	G	A	A	A	G
5603	5603	M5603	SCSC-2_GI_5_1=S	G/T	3	CSC-2_GI_5_1=SCAFFOLD_408=GI_5_2=SCAFFOLD_435=GI_5_3=SCAFFOLD_2402=SCAFFOLD_2024=GI_5_4	909692	+	N	T	N	G	G	G	T	N	G	T	G	N	G	N	N	G	G	N	T	G	G	G	T	G	K	G	N	T	N	G	G	T	N	G	T	T	G	G	G	G	T
5604	5604	M5604	SCSC-2_GI_5_1=S	T/G	3	CSC-2_GI_5_1=SCAFFOLD_408=GI_5_2=SCAFFOLD_435=GI_5_3=SCAFFOLD_2402=SCAFFOLD_2024=GI_5_4	912524	+	N	G	N	T	T	T	G	N	T	G	T	N	T	N	N	T	T	N	G	T	T	T	G	T	G	T	N	G	N	T	T	G	N	K	G	G	G	T	T	T	G
5605	5605	M5605	SCSC-2_GI_5_1=S	T/C	3	CSC-2_GI_5_1=SCAFFOLD_408=GI_5_2=SCAFFOLD_435=GI_5_3=SCAFFOLD_2402=SCAFFOLD_2024=GI_5_4	912578	+	N	C	N	T	T	T	C	N	T	C	T	N	T	N	N	T	T	N	C	T	T	T	C	T	N	T	N	C	N	T	T	C	N	T	C	C	C	T	T	T	C
5606	5606	M5606	SCSC-2_GI_5_1=S	A/T	3	CSC-2_GI_5_1=SCAFFOLD_408=GI_5_2=SCAFFOLD_435=GI_5_3=SCAFFOLD_2402=SCAFFOLD_2024=GI_5_4	912583	+	N	T	N	A	A	A	T	N	A	T	A	N	A	N	N	A	A	N	T	A	A	A	T	A	N	A	N	T	N	A	A	T	N	A	T	T	T	A	A	A	T
5607	5607	M5607	SCSC-2_GI_5_1=S	G/A	3	CSC-2_GI_5_1=SCAFFOLD_408=GI_5_2=SCAFFOLD_435=GI_5_3=SCAFFOLD_2402=SCAFFOLD_2024=GI_5_4	912673	+	N	A	N	G	G	G	A	N	G	A	G	N	G	N	N	G	G	N	A	G	G	G	A	G	A	G	N	A	N	G	G	A	N	G	A	A	R	G	G	G	A
5609	5609	M5609	SCSC-2_GI_5_1=S	A/G	3	CSC-2_GI_5_1=SCAFFOLD_408=GI_5_2=SCAFFOLD_435=GI_5_3=SCAFFOLD_2402=SCAFFOLD_2024=GI_5_4	928072	+	N	G	N	A	A	A	G	N	A	G	A	N	A	N	N	A	A	N	G	A	A	A	G	A	N	A	N	G	N	A	A	G	N	A	G	G	G	A	A	A	G
5610	5610	M5610	SCSC-2_GI_5_1=S	C/A	3	CSC-2_GI_5_1=SCAFFOLD_408=GI_5_2=SCAFFOLD_435=GI_5_3=SCAFFOLD_2402=SCAFFOLD_2024=GI_5_4	934571	+	N	A	N	C	C	C	A	N	C	A	C	N	C	N	N	C	C	N	A	C	C	C	A	C	N	C	N	A	N	C	C	A	N	C	A	A	A	C	C	C	A
5611	5611	M5611	SCSC-2_GI_5_1=S	A/C	3	CSC-2_GI_5_1=SCAFFOLD_408=GI_5_2=SCAFFOLD_435=GI_5_3=SCAFFOLD_2402=SCAFFOLD_2024=GI_5_4	934664	+	N	C	N	A	A	A	C	N	A	C	A	N	A	N	N	A	A	N	C	A	A	A	C	A	N	A	N	C	N	A	A	C	N	A	C	C	C	A	A	A	C
5612	5612	M5612	SCSC-2_GI_5_1=S	G/A	3	CSC-2_GI_5_1=SCAFFOLD_408=GI_5_2=SCAFFOLD_435=GI_5_3=SCAFFOLD_2402=SCAFFOLD_2024=GI_5_4	951794	+	N	A	N	G	G	G	A	N	G	A	G	N	G	N	N	G	G	N	A	G	G	G	A	G	A	G	N	A	N	G	G	A	N	G	A	A	A	G	G	G	A
5613	5613	M5613	SCSC-2_GI_5_1=S	A/G	3	CSC-2_GI_5_1=SCAFFOLD_408=GI_5_2=SCAFFOLD_435=GI_5_3=SCAFFOLD_2402=SCAFFOLD_2024=GI_5_4	951830	+	N	G	N	A	A	A	G	N	A	G	A	N	A	N	N	A	A	N	G	A	A	A	G	A	G	A	N	G	N	A	A	G	N	A	G	G	G	A	A	A	G
5614	5614	M5614	SCSC-2_GI_5_1=S	C/T	3	CSC-2_GI_5_1=SCAFFOLD_408=GI_5_2=SCAFFOLD_435=GI_5_3=SCAFFOLD_2402=SCAFFOLD_2024=GI_5_4	952249	+	N	T	N	C	C	C	T	N	C	T	C	N	C	N	N	C	C	N	T	C	C	C	T	C	T	C	N	T	N	C	C	T	N	C	T	T	T	C	C	C	T
5615	5615	M5615	SCSC-2_GI_5_1=S	T/A	3	CSC-2_GI_5_1=SCAFFOLD_408=GI_5_2=SCAFFOLD_435=GI_5_3=SCAFFOLD_2402=SCAFFOLD_2024=GI_5_4	952283	+	N	A	N	T	T	T	A	N	T	A	T	N	T	N	N	T	T	N	A	T	T	T	A	T	A	T	N	A	N	T	T	A	N	T	A	A	A	T	T	T	A
5616	5616	M5616	SCSC-2_GI_5_1=S	A/T	3	CSC-2_GI_5_1=SCAFFOLD_408=GI_5_2=SCAFFOLD_435=GI_5_3=SCAFFOLD_2402=SCAFFOLD_2024=GI_5_4	952289	+	N	T	N	A	A	A	T	N	A	T	A	N	A	N	N	A	A	N	T	A	A	A	T	A	T	A	N	T	N	A	A	T	N	A	T	T	T	A	A	A	T
5617	5617	M5617	SCSC-2_GI_5_1=S	C/T	3	CSC-2_GI_5_1=SCAFFOLD_408=GI_5_2=SCAFFOLD_435=GI_5_3=SCAFFOLD_2402=SCAFFOLD_2024=GI_5_4	953941	+	T	T	N	C	C	C	T	N	C	T	C	N	C	N	N	C	C	N	T	C	C	C	T	C	T	C	N	T	N	C	C	T	N	C	T	T	T	C	C	C	T
5618	5618	M5618	SCSC-2_GI_5_1=S	A/G	3	CSC-2_GI_5_1=SCAFFOLD_408=GI_5_2=SCAFFOLD_435=GI_5_3=SCAFFOLD_2402=SCAFFOLD_2024=GI_5_4	953949	+	G	G	N	A	A	A	G	N	A	G	A	N	A	N	N	A	A	N	G	A	A	A	G	A	G	A	N	G	N	A	A	G	N	A	G	G	G	A	A	A	G
5619	5619	M5619	SCSC-2_GI_5_1=S	G/A	3	CSC-2_GI_5_1=SCAFFOLD_408=GI_5_2=SCAFFOLD_435=GI_5_3=SCAFFOLD_2402=SCAFFOLD_2024=GI_5_4	953950	+	A	A	N	G	G	G	A	N	G	A	G	N	G	N	N	G	G	N	A	G	G	G	A	G	A	G	N	A	N	G	G	A	N	G	A	A	A	G	G	G	A
5620	5620	M5620	SCSC-2_GI_5_1=S	C/T	3	CSC-2_GI_5_1=SCAFFOLD_408=GI_5_2=SCAFFOLD_435=GI_5_3=SCAFFOLD_2402=SCAFFOLD_2024=GI_5_4	953971	+	T	T	N	C	C	C	T	N	C	T	C	N	C	N	N	C	C	N	T	C	C	C	T	C	T	C	N	T	N	C	C	T	N	C	T	T	T	C	C	C	T
5621	5621	M5621	SCSC-2_GI_5_1=S	A/C	3	CSC-2_GI_5_1=SCAFFOLD_408=GI_5_2=SCAFFOLD_435=GI_5_3=SCAFFOLD_2402=SCAFFOLD_2024=GI_5_4	954426	+	N	C	N	A	A	A	C	N	A	C	A	N	A	N	N	A	A	N	C	A	A	A	C	A	N	A	N	C	N	A	A	C	N	A	C	C	C	A	A	A	C
5622	5622	M5622	SCSC-2_GI_5_1=S	A/G	3	CSC-2_GI_5_1=SCAFFOLD_408=GI_5_2=SCAFFOLD_435=GI_5_3=SCAFFOLD_2402=SCAFFOLD_2024=GI_5_4	954434	+	N	G	N	A	A	A	G	N	A	G	A	N	A	N	N	A	A	N	G	A	A	A	G	A	N	A	N	G	N	A	A	G	N	A	G	G	G	A	A	A	G
5623	5623	M5623	SCSC-2_GI_5_1=S	A/C	3	CSC-2_GI_5_1=SCAFFOLD_408=GI_5_2=SCAFFOLD_435=GI_5_3=SCAFFOLD_2402=SCAFFOLD_2024=GI_5_4	1020286	+	N	C	N	A	A	A	C	N	A	C	A	N	A	N	N	A	A	N	C	A	A	A	C	A	C	A	N	C	N	A	A	C	N	A	C	C	C	A	A	A	C
5624	5624	M5624	SCSC-2_GI_5_1=S	T/C	3	CSC-2_GI_5_1=SCAFFOLD_408=GI_5_2=SCAFFOLD_435=GI_5_3=SCAFFOLD_2402=SCAFFOLD_2024=GI_5_4	1027322	+	N	C	N	T	T	T	C	N	T	C	T	N	T	N	N	T	T	N	C	T	T	T	C	T	C	T	N	C	N	T	T	C	N	T	C	C	C	T	T	T	C
5625	5625	M5625	SCSC-2_GI_5_1=S	A/G	3	CSC-2_GI_5_1=SCAFFOLD_408=GI_5_2=SCAFFOLD_435=GI_5_3=SCAFFOLD_2402=SCAFFOLD_2024=GI_5_4	1027457	+	N	G	A	A	A	A	G	N	A	G	A	N	A	N	N	A	A	N	G	A	A	A	G	A	N	A	N	G	N	A	A	G	N	A	G	G	G	A	A	A	G
5626	5626	M5626	SCSC-2_GI_5_1=S	T/C	3	CSC-2_GI_5_1=SCAFFOLD_408=GI_5_2=SCAFFOLD_435=GI_5_3=SCAFFOLD_2402=SCAFFOLD_2024=GI_5_4	1038992	+	N	C	N	T	T	T	C	N	T	C	T	N	T	N	N	T	T	N	C	T	T	T	C	T	N	T	N	C	N	T	T	C	N	T	C	C	C	T	T	T	C
5627	5627	M5627	SCSC-2_GI_5_1=S	A/G	3	CSC-2_GI_5_1=SCAFFOLD_408=GI_5_2=SCAFFOLD_435=GI_5_3=SCAFFOLD_2402=SCAFFOLD_2024=GI_5_4	1059349	+	G	G	N	A	A	A	G	N	A	G	A	N	A	N	N	A	A	N	G	A	A	A	G	G	G	A	N	G	N	G	A	G	N	A	G	G	G	A	A	A	G
5628	5628	M5628	SCSC-2_GI_5_1=S	A/G	3	CSC-2_GI_5_1=SCAFFOLD_408=GI_5_2=SCAFFOLD_435=GI_5_3=SCAFFOLD_2402=SCAFFOLD_2024=GI_5_4	1081207	+	G	G	N	A	A	A	G	N	A	G	A	N	A	N	N	A	A	N	G	A	A	A	G	G	G	A	N	G	N	G	A	G	N	A	G	G	G	A	A	A	G
5629	5629	M5629	SCSC-2_GI_5_1=S	A/G	3	CSC-2_GI_5_1=SCAFFOLD_408=GI_5_2=SCAFFOLD_435=GI_5_3=SCAFFOLD_2402=SCAFFOLD_2024=GI_5_4	1131433	+	N	G	N	A	A	A	G	N	A	G	A	N	A	N	N	A	A	N	G	A	A	A	G	G	N	A	N	G	N	G	A	G	N	A	G	G	G	A	A	A	G
5630	5630	M5630	SCSC-2_GI_5_1=S	C/A	3	CSC-2_GI_5_1=SCAFFOLD_408=GI_5_2=SCAFFOLD_435=GI_5_3=SCAFFOLD_2402=SCAFFOLD_2024=GI_5_4	1178838	+	N	A	N	C	C	C	A	N	C	A	C	N	C	N	N	C	C	N	A	C	C	C	A	A	A	C	N	A	N	A	C	A	N	C	A	C	A	C	C	C	A
5631	5631	M5631	SCSC-2_GI_5_1=S	G/A	3	CSC-2_GI_5_1=SCAFFOLD_408=GI_5_2=SCAFFOLD_435=GI_5_3=SCAFFOLD_2402=SCAFFOLD_2024=GI_5_4	1211315	+	N	A	N	G	G	G	A	N	G	A	G	N	G	N	N	G	G	N	A	G	G	G	A	A	N	G	N	A	N	A	G	A	N	G	A	G	A	G	G	G	A
5632	5632	M5632	SCSC-2_GI_5_1=S	G/T	3	CSC-2_GI_5_1=SCAFFOLD_408=GI_5_2=SCAFFOLD_435=GI_5_3=SCAFFOLD_2402=SCAFFOLD_2024=GI_5_4	1351359	+	N	T	N	G	G	G	T	N	G	N	T	N	G	N	N	G	G	N	T	G	G	G	T	T	N	G	N	T	N	T	G	T	N	G	T	G	T	G	G	G	T
5633	5633	M5633	SCSC-2_GI_5_1=S	A/G	3	CSC-2_GI_5_1=SCAFFOLD_408=GI_5_2=SCAFFOLD_435=GI_5_3=SCAFFOLD_2402=SCAFFOLD_2024=GI_5_4	1351415	+	N	G	N	A	A	A	G	N	A	N	G	N	A	N	N	A	A	N	G	A	A	A	G	G	N	A	N	G	N	G	A	G	N	A	G	A	G	A	A	A	G
5634	5634	M5634	SCSC-2_GI_5_1=S	T/A	3	CSC-2_GI_5_1=SCAFFOLD_408=GI_5_2=SCAFFOLD_435=GI_5_3=SCAFFOLD_2402=SCAFFOLD_2024=GI_5_4	1351434	+	N	A	N	T	T	T	A	N	T	A	A	N	T	T	N	T	T	N	A	T	T	T	A	A	A	T	N	A	N	A	T	A	N	T	A	T	A	T	T	T	A
5635	5635	M5635	SCSC-2_GI_5_1=S	T/A	3	CSC-2_GI_5_1=SCAFFOLD_408=GI_5_2=SCAFFOLD_435=GI_5_3=SCAFFOLD_2402=SCAFFOLD_2024=GI_5_4	1367048	+	N	A	N	T	T	T	A	N	T	A	A	N	T	N	N	T	T	N	A	T	T	T	A	A	A	T	N	A	N	A	T	A	N	T	A	T	A	T	T	T	A
5636	5636	M5636	SCSC-2_GI_5_1=S	T/C	3	CSC-2_GI_5_1=SCAFFOLD_408=GI_5_2=SCAFFOLD_435=GI_5_3=SCAFFOLD_2402=SCAFFOLD_2024=GI_5_4	1367054	+	N	C	N	T	T	T	C	N	T	C	C	N	T	N	N	T	T	N	C	T	T	T	C	C	C	T	N	C	N	C	T	C	N	T	C	T	C	T	T	T	C
5637	5637	M5637	SCSC-2_GI_5_1=S	C/T	3	CSC-2_GI_5_1=SCAFFOLD_408=GI_5_2=SCAFFOLD_435=GI_5_3=SCAFFOLD_2402=SCAFFOLD_2024=GI_5_4	1367063	+	N	T	N	C	C	C	T	N	C	T	T	N	C	N	N	C	C	N	T	C	C	C	T	T	T	C	N	T	N	T	C	T	N	C	T	C	T	C	C	C	T
5638	5638	M5638	SCSC-2_GI_5_1=S	C/T	3	CSC-2_GI_5_1=SCAFFOLD_408=GI_5_2=SCAFFOLD_435=GI_5_3=SCAFFOLD_2402=SCAFFOLD_2024=GI_5_4	1367084	+	N	T	N	C	C	C	T	N	C	T	T	N	C	N	N	C	C	N	T	C	C	C	T	T	T	C	N	T	N	T	C	T	N	C	T	C	T	C	C	C	T
5639	5639	M5639	SCSC-2_GI_5_1=S	C/T	3	CSC-2_GI_5_1=SCAFFOLD_408=GI_5_2=SCAFFOLD_435=GI_5_3=SCAFFOLD_2402=SCAFFOLD_2024=GI_5_4	1367353	+	T	T	N	C	C	C	T	N	C	T	T	N	C	N	N	C	C	N	T	C	C	C	T	T	N	C	N	T	N	T	C	T	N	C	T	C	T	C	C	C	T
5641	5641	M5641	SCSC-2_GI_5_1=S	G/A	3	CSC-2_GI_5_1=SCAFFOLD_408=GI_5_2=SCAFFOLD_435=GI_5_3=SCAFFOLD_2402=SCAFFOLD_2024=GI_5_4	1432292	+	N	A	N	G	G	G	A	N	G	A	A	N	G	N	N	G	G	N	A	G	G	G	A	A	A	G	N	A	N	A	G	A	N	G	A	G	A	G	G	G	A
5642	5642	M5642	SCSC-2_GI_5_1=S	T/G	3	CSC-2_GI_5_1=SCAFFOLD_408=GI_5_2=SCAFFOLD_435=GI_5_3=SCAFFOLD_2402=SCAFFOLD_2024=GI_5_4	1432302	+	N	G	N	T	T	T	G	N	T	G	G	N	T	N	N	T	T	N	G	T	T	T	G	G	G	T	N	G	N	G	T	G	N	T	G	T	G	T	T	T	G
5643	5643	M5643	SCSC-2_GI_5_1=S	G/C	3	CSC-2_GI_5_1=SCAFFOLD_408=GI_5_2=SCAFFOLD_435=GI_5_3=SCAFFOLD_2402=SCAFFOLD_2024=GI_5_4	1497034	+	N	G	N	C	C	C	G	N	C	G	G	N	C	N	N	G	C	N	G	C	C	C	G	G	N	C	N	G	N	G	C	G	N	C	C	C	G	C	C	C	G
5646	5646	M5646	SCSC-2_GI_5_1=S	C/T	3	CSC-2_GI_5_1=SCAFFOLD_408=GI_5_2=SCAFFOLD_435=GI_5_3=SCAFFOLD_2402=SCAFFOLD_2024=GI_5_4	1499397	+	N	T	N	C	C	C	T	N	C	T	T	N	C	N	N	T	C	N	T	C	C	C	T	T	T	C	N	T	N	T	C	T	N	C	C	C	T	C	C	C	T
5647	5647	M5647	SCSC-2_GI_5_1=S	C/T	3	CSC-2_GI_5_1=SCAFFOLD_408=GI_5_2=SCAFFOLD_435=GI_5_3=SCAFFOLD_2402=SCAFFOLD_2024=GI_5_4	1499440	+	N	C	N	T	T	T	C	N	T	C	C	N	T	N	N	C	T	N	C	T	T	T	C	C	C	T	N	C	N	C	T	C	N	T	T	T	C	T	T	T	C
5648	5648	M5648	SCSC-2_GI_5_1=S	G/T	3	CSC-2_GI_5_1=SCAFFOLD_408=GI_5_2=SCAFFOLD_435=GI_5_3=SCAFFOLD_2402=SCAFFOLD_2024=GI_5_4	1499884	+	N	G	N	T	T	T	G	N	T	G	G	N	T	N	N	G	T	N	G	T	T	T	G	G	G	T	N	G	N	G	T	G	N	T	T	T	G	T	T	T	G
5649	5649	M5649	SCSC-2_GI_5_1=S	T/C	3	CSC-2_GI_5_1=SCAFFOLD_408=GI_5_2=SCAFFOLD_435=GI_5_3=SCAFFOLD_2402=SCAFFOLD_2024=GI_5_4	1499887	+	N	T	N	C	C	C	T	N	C	T	T	N	C	N	N	T	C	N	T	C	C	C	T	T	T	C	N	T	N	T	C	T	N	C	C	C	T	C	C	C	T
5650	5650	M5650	SCSC-2_GI_5_1=S	C/A	3	CSC-2_GI_5_1=SCAFFOLD_408=GI_5_2=SCAFFOLD_435=GI_5_3=SCAFFOLD_2402=SCAFFOLD_2024=GI_5_4	1500842	+	C	C	N	A	A	A	C	N	A	C	C	N	A	N	N	C	A	N	C	A	A	A	C	C	C	A	N	C	N	C	A	C	N	A	A	A	M	A	A	A	C
5651	5651	M5651	SCSC-2_GI_5_1=S	G/A	3	CSC-2_GI_5_1=SCAFFOLD_408=GI_5_2=SCAFFOLD_435=GI_5_3=SCAFFOLD_2402=SCAFFOLD_2024=GI_5_4	1515663	+	N	G	N	A	A	A	G	N	A	G	G	N	A	N	N	G	A	N	G	A	A	A	G	G	N	A	N	G	N	G	A	G	N	A	A	A	N	A	A	A	G
5652	5652	M5652	SCSC-2_GI_5_1=S	G/T	3	CSC-2_GI_5_1=SCAFFOLD_408=GI_5_2=SCAFFOLD_435=GI_5_3=SCAFFOLD_2402=SCAFFOLD_2024=GI_5_4	1527521	+	N	G	N	T	T	T	G	N	T	G	G	N	T	N	N	G	T	N	G	T	T	T	G	G	N	T	N	G	N	G	T	G	N	T	T	T	G	T	T	T	G
5653	5653	M5653	SCSC-2_GI_5_1=S	A/T	3	CSC-2_GI_5_1=SCAFFOLD_408=GI_5_2=SCAFFOLD_435=GI_5_3=SCAFFOLD_2402=SCAFFOLD_2024=GI_5_4	1544178	+	N	A	N	T	T	T	A	N	T	A	A	N	T	N	N	A	T	N	N	T	T	T	A	A	N	T	N	A	N	A	T	A	N	T	T	T	A	T	T	T	A
5654	5654	M5654	SCSC-2_GI_5_1=S	G/A	3	CSC-2_GI_5_1=SCAFFOLD_408=GI_5_2=SCAFFOLD_435=GI_5_3=SCAFFOLD_2402=SCAFFOLD_2024=GI_5_4	1544298	+	N	G	A	A	A	A	G	N	A	G	G	N	A	N	N	G	A	N	G	A	A	A	G	G	G	A	N	G	N	G	A	G	N	A	A	A	G	A	A	A	G
5655	5655	M5655	SCSC-2_GI_5_1=S	A/G	3	CSC-2_GI_5_1=SCAFFOLD_408=GI_5_2=SCAFFOLD_435=GI_5_3=SCAFFOLD_2402=SCAFFOLD_2024=GI_5_4	1544319	+	N	A	G	G	G	G	A	N	G	A	A	N	G	N	N	A	G	N	A	G	G	G	A	A	A	G	N	A	N	A	G	A	N	G	G	G	A	G	G	G	A
5656	5656	M5656	SCSC-2_GI_5_1=S	T/A	3	CSC-2_GI_5_1=SCAFFOLD_408=GI_5_2=SCAFFOLD_435=GI_5_3=SCAFFOLD_2402=SCAFFOLD_2024=GI_5_4	1544349	+	N	T	A	A	A	A	T	N	A	T	T	N	A	N	N	T	A	N	T	A	A	A	T	T	T	A	N	T	N	T	A	T	N	A	A	A	T	A	A	A	T
5661	5661	M5661	SCSC-2_GI_5_1=S	T/C	3	CSC-2_GI_5_1=SCAFFOLD_408=GI_5_2=SCAFFOLD_435=GI_5_3=SCAFFOLD_2402=SCAFFOLD_2024=GI_5_4	1660285	+	N	C	N	T	T	T	C	N	T	C	C	N	T	N	N	C	T	N	T	T	T	T	C	C	N	T	N	C	N	C	T	C	N	T	T	T	C	T	T	T	C
5662	5662	M5662	SCSC-2_GI_5_1=S	C/T	3	CSC-2_GI_5_1=SCAFFOLD_408=GI_5_2=SCAFFOLD_435=GI_5_3=SCAFFOLD_2402=SCAFFOLD_2024=GI_5_4	1660286	+	N	T	N	C	C	C	T	N	C	T	T	N	C	N	N	T	C	N	C	C	C	C	T	T	N	C	N	T	N	T	C	T	N	C	C	C	T	C	C	C	T
5663	5663	M5663	SCSC-2_GI_5_1=S	A/C	3	CSC-2_GI_5_1=SCAFFOLD_408=GI_5_2=SCAFFOLD_435=GI_5_3=SCAFFOLD_2402=SCAFFOLD_2024=GI_5_4	1660303	+	N	C	N	A	A	A	C	N	A	C	C	N	A	N	N	C	A	N	A	A	A	A	C	C	N	A	N	C	N	C	A	C	N	A	A	A	C	A	A	A	C
5664	5664	M5664	SCSC-2_GI_5_1=S	G/A	3	CSC-2_GI_5_1=SCAFFOLD_408=GI_5_2=SCAFFOLD_435=GI_5_3=SCAFFOLD_2402=SCAFFOLD_2024=GI_5_4	1660338	+	A	A	N	G	G	G	A	N	G	N	A	N	G	N	N	A	G	N	G	G	G	G	A	A	A	G	N	A	N	A	G	A	N	N	G	G	A	G	G	G	A
5665	5665	M5665	SCSC-2_GI_5_1=S	T/C	3	CSC-2_GI_5_1=SCAFFOLD_408=GI_5_2=SCAFFOLD_435=GI_5_3=SCAFFOLD_2402=SCAFFOLD_2024=GI_5_4	1660342	+	C	C	N	T	T	T	C	N	T	N	C	N	T	N	N	C	T	N	T	T	T	T	C	C	C	T	N	C	N	C	T	C	N	N	T	T	C	T	T	T	C
5666	5666	M5666	SCSC-2_GI_5_1=S	A/C	3	CSC-2_GI_5_1=SCAFFOLD_408=GI_5_2=SCAFFOLD_435=GI_5_3=SCAFFOLD_2402=SCAFFOLD_2024=GI_5_4	1660358	+	C	C	N	A	A	A	C	N	A	N	C	N	A	N	N	C	A	N	A	A	A	A	C	C	C	A	N	C	N	C	A	C	N	N	A	A	C	A	A	A	C
5667	5667	M5667	SCSC-2_GI_5_1=S	G/C	3	CSC-2_GI_5_1=SCAFFOLD_408=GI_5_2=SCAFFOLD_435=GI_5_3=SCAFFOLD_2402=SCAFFOLD_2024=GI_5_4	1660365	+	C	C	N	G	G	G	C	N	G	N	C	N	G	N	N	C	G	N	G	G	G	G	C	C	C	G	N	C	N	C	G	C	N	N	G	G	C	G	G	G	C
5668	5668	M5668	SCSC-2_GI_5_1=S	C/A	3	CSC-2_GI_5_1=SCAFFOLD_408=GI_5_2=SCAFFOLD_435=GI_5_3=SCAFFOLD_2402=SCAFFOLD_2024=GI_5_4	1660414	+	N	A	N	C	C	C	A	N	C	A	A	N	C	N	N	A	C	N	C	C	C	C	A	A	A	C	N	A	N	A	C	A	N	C	C	C	A	C	C	C	A
5669	5669	M5669	SCSC-2_GI_5_1=S	G/A	3	CSC-2_GI_5_1=SCAFFOLD_408=GI_5_2=SCAFFOLD_435=GI_5_3=SCAFFOLD_2402=SCAFFOLD_2024=GI_5_4	1660424	+	N	A	N	G	G	G	A	N	G	A	A	N	G	N	N	A	G	N	G	G	G	G	A	A	A	G	N	A	N	A	G	A	N	G	G	G	A	G	G	G	A
5670	5670	M5670	SCSC-2_GI_5_1=S	C/T	3	CSC-2_GI_5_1=SCAFFOLD_408=GI_5_2=SCAFFOLD_435=GI_5_3=SCAFFOLD_2402=SCAFFOLD_2024=GI_5_4	1660447	+	N	T	N	C	C	C	T	N	C	T	T	N	C	N	N	T	C	N	C	C	C	C	T	T	T	C	N	T	N	T	C	T	N	C	C	C	T	C	C	C	T
5671	5671	M5671	SCSC-2_GI_5_1=S	T/A	3	CSC-2_GI_5_1=SCAFFOLD_408=GI_5_2=SCAFFOLD_435=GI_5_3=SCAFFOLD_2402=SCAFFOLD_2024=GI_5_4	1660890	+	N	A	N	T	T	T	A	N	T	A	A	N	T	N	N	A	T	N	T	T	T	T	A	A	A	T	N	A	N	A	T	A	N	T	T	T	A	T	T	T	A
5672	5672	M5672	SCSC-2_GI_5_1=S	A/C	3	CSC-2_GI_5_1=SCAFFOLD_408=GI_5_2=SCAFFOLD_435=GI_5_3=SCAFFOLD_2402=SCAFFOLD_2024=GI_5_4	1660921	+	N	C	N	A	A	A	C	N	A	C	C	N	A	N	N	C	A	N	A	A	A	A	C	C	C	A	N	C	N	C	A	C	N	A	A	A	C	A	A	A	C
5673	5673	M5673	SCSC-2_GI_5_1=S	G/A	3	CSC-2_GI_5_1=SCAFFOLD_408=GI_5_2=SCAFFOLD_435=GI_5_3=SCAFFOLD_2402=SCAFFOLD_2024=GI_5_4	1661163	+	A	A	N	G	G	G	A	N	G	A	A	N	G	N	N	A	G	N	G	G	G	G	A	A	A	G	N	A	N	A	G	A	N	G	G	G	A	G	G	G	A
5674	5674	M5674	SCSC-2_GI_5_1=S	C/G	3	CSC-2_GI_5_1=SCAFFOLD_408=GI_5_2=SCAFFOLD_435=GI_5_3=SCAFFOLD_2402=SCAFFOLD_2024=GI_5_4	1675081	+	N	G	N	C	C	C	G	N	C	G	G	N	C	N	N	G	C	N	C	C	C	C	G	G	G	C	N	G	N	G	C	G	N	C	C	C	G	C	C	C	G
5676	5676	M5676	SCSC-2_GI_5_1=S	C/G	3	CSC-2_GI_5_1=SCAFFOLD_408=GI_5_2=SCAFFOLD_435=GI_5_3=SCAFFOLD_2402=SCAFFOLD_2024=GI_5_4	1718034	+	N	G	N	C	C	C	G	N	C	G	G	N	C	N	N	G	C	N	C	C	C	C	G	G	G	C	N	G	N	G	C	G	N	C	C	C	G	C	C	C	G
5677	5677	M5677	SCSC-2_GI_5_1=S	G/A	3	CSC-2_GI_5_1=SCAFFOLD_408=GI_5_2=SCAFFOLD_435=GI_5_3=SCAFFOLD_2402=SCAFFOLD_2024=GI_5_4	1722021	+	A	A	N	G	G	G	A	N	G	A	A	N	G	N	N	A	G	N	G	G	G	G	A	A	N	G	N	A	N	A	G	A	N	G	G	G	A	G	N	G	A
5678	5678	M5678	SCSC-2_GI_5_1=S	T/G	3	CSC-2_GI_5_1=SCAFFOLD_408=GI_5_2=SCAFFOLD_435=GI_5_3=SCAFFOLD_2402=SCAFFOLD_2024=GI_5_4	1722713	+	N	G	N	T	T	T	G	N	T	G	G	N	T	N	N	G	T	N	T	T	T	T	G	G	G	T	N	G	N	G	T	G	N	T	T	T	G	T	T	T	G
5679	5679	M5679	SCSC-2_GI_5_1=S	T/A	3	CSC-2_GI_5_1=SCAFFOLD_408=GI_5_2=SCAFFOLD_435=GI_5_3=SCAFFOLD_2402=SCAFFOLD_2024=GI_5_4	1722719	+	N	A	N	T	T	T	A	N	T	A	A	N	T	N	N	A	T	N	T	T	T	T	A	A	A	T	N	A	N	A	T	A	N	T	T	T	A	T	T	T	A
5680	5680	M5680	SCSC-2_GI_5_1=S	T/C	3	CSC-2_GI_5_1=SCAFFOLD_408=GI_5_2=SCAFFOLD_435=GI_5_3=SCAFFOLD_2402=SCAFFOLD_2024=GI_5_4	1735462	+	N	C	T	T	T	T	C	N	T	C	C	N	T	N	N	C	T	N	T	T	T	T	C	C	C	T	N	C	N	C	T	C	N	T	T	T	C	T	T	T	C
5682	5682	M5682	SCSC-2_GI_5_1=S	A/C	3	CSC-2_GI_5_1=SCAFFOLD_408=GI_5_2=SCAFFOLD_435=GI_5_3=SCAFFOLD_2402=SCAFFOLD_2024=GI_5_4	1891920	+	N	C	N	A	A	A	M	N	A	C	C	N	A	N	N	C	A	N	A	A	A	A	C	C	N	C	N	A	N	C	A	C	N	A	A	A	C	A	A	A	C
5685	5685	M5685	SCSC-2_GI_5_1=S	C/T	3	CSC-2_GI_5_1=SCAFFOLD_408=GI_5_2=SCAFFOLD_435=GI_5_3=SCAFFOLD_2402=SCAFFOLD_2024=GI_5_4	1900017	+	N	T	C	C	C	C	Y	N	C	T	T	N	C	N	N	T	C	N	C	C	C	C	T	T	T	T	N	C	N	T	C	T	N	C	C	C	T	C	C	C	T
5686	5686	M5686	SCSC-2_GI_5_1=S	C/A	3	CSC-2_GI_5_1=SCAFFOLD_408=GI_5_2=SCAFFOLD_435=GI_5_3=SCAFFOLD_2402=SCAFFOLD_2024=GI_5_4	1927618	+	N	A	N	C	C	C	M	N	C	A	A	N	C	N	N	A	C	N	C	C	C	C	A	A	A	A	N	C	N	A	C	A	N	C	C	C	A	C	C	C	A
5687	5687	M5687	SCSC-2_GI_5_1=S	T/C	3	CSC-2_GI_5_1=SCAFFOLD_408=GI_5_2=SCAFFOLD_435=GI_5_3=SCAFFOLD_2402=SCAFFOLD_2024=GI_5_4	1927638	+	N	C	N	T	T	T	Y	N	T	C	C	N	T	N	N	C	T	N	T	T	T	T	C	C	C	C	N	T	N	C	T	C	N	T	T	T	C	T	T	T	C
5688	5688	M5688	SCSC-2_GI_5_1=S	G/A	3	CSC-2_GI_5_1=SCAFFOLD_408=GI_5_2=SCAFFOLD_435=GI_5_3=SCAFFOLD_2402=SCAFFOLD_2024=GI_5_4	1927642	+	N	A	N	G	G	G	R	N	G	A	A	N	G	N	N	A	G	N	G	G	G	G	A	A	A	A	N	G	N	A	G	A	N	G	G	G	A	G	G	G	A
5689	5689	M5689	SCSC-2_GI_5_1=S	C/T	3	CSC-2_GI_5_1=SCAFFOLD_408=GI_5_2=SCAFFOLD_435=GI_5_3=SCAFFOLD_2402=SCAFFOLD_2024=GI_5_4	1927665	+	N	T	N	C	C	C	Y	N	C	T	T	N	C	N	N	T	C	N	C	C	C	C	T	T	T	T	N	C	N	T	C	T	N	C	C	C	T	C	C	C	T
5690	5690	M5690	SCSC-2_GI_5_1=S	C/T	3	CSC-2_GI_5_1=SCAFFOLD_408=GI_5_2=SCAFFOLD_435=GI_5_3=SCAFFOLD_2402=SCAFFOLD_2024=GI_5_4	1930161	+	N	T	N	C	C	C	Y	N	C	T	T	N	C	N	N	T	C	N	C	C	C	C	T	T	N	T	N	C	N	T	C	T	N	C	C	C	T	C	C	C	T
5699	5699	M5699	SCSC-2_GI_5_1=S	G/A	3	CSC-2_GI_5_1=SCAFFOLD_408=GI_5_2=SCAFFOLD_435=GI_5_3=SCAFFOLD_2402=SCAFFOLD_2024=GI_5_4	1939638	+	N	A	N	G	G	G	R	N	G	A	A	N	G	N	N	A	G	N	G	G	G	G	A	A	A	A	N	G	N	A	G	A	N	G	G	G	A	G	G	G	A
5700	5700	M5700	SCSC-2_GI_5_1=S	T/C	3	CSC-2_GI_5_1=SCAFFOLD_408=GI_5_2=SCAFFOLD_435=GI_5_3=SCAFFOLD_2402=SCAFFOLD_2024=GI_5_4	2000422	+	N	C	N	T	T	T	Y	N	T	C	C	N	T	N	N	C	C	N	T	T	T	T	C	C	C	C	N	T	N	C	T	C	N	T	T	T	Y	T	T	T	C
5701	5701	M5701	SCSC-2_GI_5_1=S	C/T	3	CSC-2_GI_5_1=SCAFFOLD_408=GI_5_2=SCAFFOLD_435=GI_5_3=SCAFFOLD_2402=SCAFFOLD_2024=GI_5_4	2000443	+	N	T	N	C	C	C	Y	N	C	T	T	N	C	N	N	T	T	N	C	C	C	C	T	T	T	T	N	C	N	T	C	T	N	C	C	C	Y	C	C	C	T
5702	5702	M5702	SCSC-2_GI_5_1=S	A/G	3	CSC-2_GI_5_1=SCAFFOLD_408=GI_5_2=SCAFFOLD_435=GI_5_3=SCAFFOLD_2402=SCAFFOLD_2024=GI_5_4	2001715	+	N	G	A	A	A	A	R	N	A	G	G	N	A	N	N	G	G	N	A	A	A	A	G	G	G	G	N	A	N	G	A	G	N	A	A	A	R	A	A	A	G
5703	5703	M5703	SCSC-2_GI_5_1=S	A/G	3	CSC-2_GI_5_1=SCAFFOLD_408=GI_5_2=SCAFFOLD_435=GI_5_3=SCAFFOLD_2402=SCAFFOLD_2024=GI_5_4	2001718	+	N	G	A	A	A	A	R	N	A	G	G	N	A	N	N	G	G	N	A	A	A	A	G	G	G	G	N	A	N	G	A	G	N	A	A	A	R	A	A	A	G
5704	5704	M5704	SCSC-2_GI_5_1=S	G/A	3	CSC-2_GI_5_1=SCAFFOLD_408=GI_5_2=SCAFFOLD_435=GI_5_3=SCAFFOLD_2402=SCAFFOLD_2024=GI_5_4	2001721	+	N	A	G	G	G	G	R	N	G	A	A	N	G	N	N	A	A	N	G	G	G	G	A	A	A	A	N	G	N	A	G	A	N	G	G	G	R	G	G	G	A
5705	5705	M5705	SCSC-2_GI_5_1=S	C/T	3	CSC-2_GI_5_1=SCAFFOLD_408=GI_5_2=SCAFFOLD_435=GI_5_3=SCAFFOLD_2402=SCAFFOLD_2024=GI_5_4	2001739	+	N	T	C	C	C	C	Y	N	C	T	T	N	C	N	N	T	T	N	C	C	C	C	T	T	T	T	N	C	N	T	C	T	N	C	C	C	Y	C	C	C	T
5706	5706	M5706	SCSC-2_GI_5_1=S	A/G	3	CSC-2_GI_5_1=SCAFFOLD_408=GI_5_2=SCAFFOLD_435=GI_5_3=SCAFFOLD_2402=SCAFFOLD_2024=GI_5_4	2005217	+	N	G	N	A	A	A	R	N	A	G	G	N	A	N	N	G	G	N	A	A	A	A	G	G	G	G	N	A	N	G	A	G	N	A	A	A	R	A	A	A	G
5709	5709	M5709	SCSC-2_GI_5_1=S	G/A	3	CSC-2_GI_5_1=SCAFFOLD_408=GI_5_2=SCAFFOLD_435=GI_5_3=SCAFFOLD_2402=SCAFFOLD_2024=GI_5_4	2009004	+	N	A	N	G	G	G	R	N	G	A	A	N	G	N	N	A	A	N	G	G	G	G	A	A	A	A	N	G	N	A	G	A	N	G	G	G	R	G	G	G	A
5710	5710	M5710	SCSC-2_GI_5_1=S	G/C	3	CSC-2_GI_5_1=SCAFFOLD_408=GI_5_2=SCAFFOLD_435=GI_5_3=SCAFFOLD_2402=SCAFFOLD_2024=GI_5_4	2009060	+	N	C	N	G	G	G	S	N	G	C	C	N	G	N	N	C	C	N	G	G	G	G	C	C	C	C	N	G	N	C	G	C	N	G	G	G	S	G	G	G	C
5711	5711	M5711	SCSC-2_GI_5_1=S	G/A	3	CSC-2_GI_5_1=SCAFFOLD_408=GI_5_2=SCAFFOLD_435=GI_5_3=SCAFFOLD_2402=SCAFFOLD_2024=GI_5_4	2009062	+	N	A	N	G	G	G	R	N	G	A	A	N	G	N	N	A	A	N	G	G	G	G	A	A	A	A	N	G	N	A	G	A	N	G	G	G	R	G	G	G	A
5714	5714	M5714	SCSC-2_GI_5_1=S	T/C	3	CSC-2_GI_5_1=SCAFFOLD_408=GI_5_2=SCAFFOLD_435=GI_5_3=SCAFFOLD_2402=SCAFFOLD_2024=GI_5_4	2015809	+	N	C	N	T	T	T	Y	N	T	C	C	N	T	N	N	C	N	N	T	T	T	T	C	C	N	C	N	T	N	C	T	C	N	T	T	T	Y	T	T	T	C
5715	5715	M5715	SCSC-2_GI_5_1=S	G/C	3	CSC-2_GI_5_1=SCAFFOLD_408=GI_5_2=SCAFFOLD_435=GI_5_3=SCAFFOLD_2402=SCAFFOLD_2024=GI_5_4	2017038	+	N	C	G	G	G	G	S	N	G	C	C	N	G	N	N	C	C	N	G	G	G	G	C	C	N	C	N	G	N	C	G	C	N	G	G	G	S	G	G	G	C
5716	5716	M5716	SCSC-2_GI_5_1=S	A/G	3	CSC-2_GI_5_1=SCAFFOLD_408=GI_5_2=SCAFFOLD_435=GI_5_3=SCAFFOLD_2402=SCAFFOLD_2024=GI_5_4	2017044	+	N	G	A	A	A	A	R	N	A	G	G	N	A	N	N	G	G	N	A	A	A	A	G	G	N	G	N	A	N	G	A	G	N	A	A	A	R	A	A	A	G
5717	5717	M5717	SCSC-2_GI_5_1=S	G/A	3	CSC-2_GI_5_1=SCAFFOLD_408=GI_5_2=SCAFFOLD_435=GI_5_3=SCAFFOLD_2402=SCAFFOLD_2024=GI_5_4	2017068	+	N	A	G	G	G	G	R	N	G	A	A	N	G	N	N	A	A	N	G	G	G	G	A	A	N	A	N	G	N	A	G	A	N	N	G	G	R	G	G	G	A
5718	5718	M5718	SCSC-2_GI_5_1=S	T/G	3	CSC-2_GI_5_1=SCAFFOLD_408=GI_5_2=SCAFFOLD_435=GI_5_3=SCAFFOLD_2402=SCAFFOLD_2024=GI_5_4	2017069	+	N	G	T	T	T	T	K	N	T	G	G	N	T	N	N	G	G	N	T	T	T	T	G	G	N	G	N	T	N	G	T	G	N	N	T	T	K	T	T	T	G
5719	5719	M5719	SCSC-2_GI_5_1=S	G/A	3	CSC-2_GI_5_1=SCAFFOLD_408=GI_5_2=SCAFFOLD_435=GI_5_3=SCAFFOLD_2402=SCAFFOLD_2024=GI_5_4	2043635	+	N	A	N	G	G	G	R	N	G	A	A	N	G	N	N	A	A	N	G	G	G	G	A	A	A	A	N	G	N	A	G	A	N	G	G	G	R	G	G	G	A
5720	5720	M5720	SCSC-2_GI_5_1=S	C/T	3	CSC-2_GI_5_1=SCAFFOLD_408=GI_5_2=SCAFFOLD_435=GI_5_3=SCAFFOLD_2402=SCAFFOLD_2024=GI_5_4	2043645	+	N	T	N	C	C	C	Y	N	C	T	T	N	C	N	N	T	T	N	C	C	C	C	T	T	T	T	N	C	N	T	C	T	N	C	C	C	Y	C	C	C	T
5721	5721	M5721	SCSC-2_GI_5_1=S	T/C	3	CSC-2_GI_5_1=SCAFFOLD_408=GI_5_2=SCAFFOLD_435=GI_5_3=SCAFFOLD_2402=SCAFFOLD_2024=GI_5_4	2043663	+	N	C	N	T	T	T	Y	N	T	C	C	N	T	N	N	C	C	N	T	T	T	T	C	C	C	C	N	T	N	C	T	C	N	T	T	T	Y	T	T	T	C
5723	5723	M5723	SCSC-2_GI_5_1=S	T/C	3	CSC-2_GI_5_1=SCAFFOLD_408=GI_5_2=SCAFFOLD_435=GI_5_3=SCAFFOLD_2402=SCAFFOLD_2024=GI_5_4	2093601	+	N	C	N	T	T	T	Y	N	T	C	C	N	T	N	N	C	C	N	T	T	T	T	C	C	C	C	N	T	N	C	T	C	N	T	T	T	Y	T	T	N	C
5724	5724	M5724	SCSC-2_GI_5_1=S	A/T	3	CSC-2_GI_5_1=SCAFFOLD_408=GI_5_2=SCAFFOLD_435=GI_5_3=SCAFFOLD_2402=SCAFFOLD_2024=GI_5_4	2093602	+	N	T	N	A	A	A	W	N	A	T	T	N	A	N	N	T	T	N	A	A	A	A	T	T	T	T	N	A	N	T	A	T	N	A	A	A	W	A	A	N	T
5725	5725	M5725	SCSC-2_GI_5_1=S	A/T	3	CSC-2_GI_5_1=SCAFFOLD_408=GI_5_2=SCAFFOLD_435=GI_5_3=SCAFFOLD_2402=SCAFFOLD_2024=GI_5_4	2093656	+	N	T	N	A	A	A	W	N	A	T	T	N	A	N	N	T	T	N	A	A	A	A	T	T	T	T	N	A	N	T	A	T	N	A	A	A	W	A	A	A	T
5726	5726	M5726	SCSC-2_GI_5_1=S	G/A	3	CSC-2_GI_5_1=SCAFFOLD_408=GI_5_2=SCAFFOLD_435=GI_5_3=SCAFFOLD_2402=SCAFFOLD_2024=GI_5_4	2093665	+	N	A	N	G	G	G	R	N	G	A	A	N	G	N	N	A	A	N	G	G	G	G	A	A	A	A	N	G	N	A	G	A	N	G	G	G	R	G	G	G	A
5727	5727	M5727	SCSC-2_GI_5_1=S	T/A	3	CSC-2_GI_5_1=SCAFFOLD_408=GI_5_2=SCAFFOLD_435=GI_5_3=SCAFFOLD_2402=SCAFFOLD_2024=GI_5_4	2150369	+	N	A	N	T	T	T	W	N	T	W	A	N	T	N	N	A	A	N	T	T	T	T	A	A	A	A	N	T	N	A	T	A	N	T	T	T	W	T	T	T	A
5728	5728	M5728	SCSC-2_GI_5_1=S	T/C	3	CSC-2_GI_5_1=SCAFFOLD_408=GI_5_2=SCAFFOLD_435=GI_5_3=SCAFFOLD_2402=SCAFFOLD_2024=GI_5_4	2150394	+	N	C	N	T	T	T	Y	N	T	Y	C	N	T	N	N	C	C	N	T	T	T	T	C	C	C	C	N	T	N	C	T	C	N	T	T	T	Y	T	T	T	C
5729	5729	M5729	SCSC-2_GI_5_1=S	T/C	3	CSC-2_GI_5_1=SCAFFOLD_408=GI_5_2=SCAFFOLD_435=GI_5_3=SCAFFOLD_2402=SCAFFOLD_2024=GI_5_4	2155179	+	N	C	N	T	T	T	Y	N	T	C	C	N	T	N	N	C	C	N	T	T	T	T	C	C	N	C	N	T	N	C	T	C	N	T	T	T	Y	T	T	T	C
5730	5730	M5730	SCSC-2_GI_5_1=S	A/T	3	CSC-2_GI_5_1=SCAFFOLD_408=GI_5_2=SCAFFOLD_435=GI_5_3=SCAFFOLD_2402=SCAFFOLD_2024=GI_5_4	2156098	+	N	T	N	A	A	A	W	N	A	T	T	N	A	N	N	T	T	N	A	A	A	A	T	T	N	T	N	A	N	T	A	T	N	A	A	A	W	A	A	A	T
5731	5731	M5731	SCSC-2_GI_5_1=S	T/C	3	CSC-2_GI_5_1=SCAFFOLD_408=GI_5_2=SCAFFOLD_435=GI_5_3=SCAFFOLD_2402=SCAFFOLD_2024=GI_5_4	2156245	+	N	C	N	T	T	T	Y	N	T	C	C	N	T	N	N	C	C	N	T	T	T	T	C	C	N	C	N	T	N	C	T	C	N	T	T	T	Y	T	T	T	C
5732	5732	M5732	SCSC-2_GI_5_1=S	T/A	3	CSC-2_GI_5_1=SCAFFOLD_408=GI_5_2=SCAFFOLD_435=GI_5_3=SCAFFOLD_2402=SCAFFOLD_2024=GI_5_4	2157681	+	T	A	T	T	T	T	W	N	T	A	A	N	T	N	N	A	A	N	T	T	T	T	A	A	A	A	N	T	N	A	T	A	N	T	T	T	W	T	T	T	A
5733	5733	M5733	SCSC-2_GI_5_1=S	A/G	3	CSC-2_GI_5_1=SCAFFOLD_408=GI_5_2=SCAFFOLD_435=GI_5_3=SCAFFOLD_2402=SCAFFOLD_2024=GI_5_4	2157778	+	N	G	N	A	A	A	R	N	A	G	G	N	A	N	N	G	G	N	A	A	A	A	G	G	G	G	N	A	N	G	A	G	N	A	A	A	R	A	A	A	G
5734	5734	M5734	SCSC-2_GI_5_1=S	G/A	3	CSC-2_GI_5_1=SCAFFOLD_408=GI_5_2=SCAFFOLD_435=GI_5_3=SCAFFOLD_2402=SCAFFOLD_2024=GI_5_4	2157797	+	N	A	N	G	G	G	R	N	G	A	A	N	G	N	N	A	A	N	G	G	G	G	A	A	A	A	N	G	N	A	G	A	N	G	G	G	R	G	G	G	A
5735	5735	M5735	SCSC-2_GI_5_1=S	A/T	3	CSC-2_GI_5_1=SCAFFOLD_408=GI_5_2=SCAFFOLD_435=GI_5_3=SCAFFOLD_2402=SCAFFOLD_2024=GI_5_4	2161768	+	N	T	N	A	A	A	W	N	A	T	T	N	A	N	N	T	T	N	A	A	A	A	T	T	N	T	N	A	N	T	A	T	N	A	A	A	W	A	A	A	T
5736	5736	M5736	SCSC-2_GI_5_1=S	A/C	3	CSC-2_GI_5_1=SCAFFOLD_408=GI_5_2=SCAFFOLD_435=GI_5_3=SCAFFOLD_2402=SCAFFOLD_2024=GI_5_4	2161777	+	N	C	N	A	A	A	M	N	A	C	C	N	A	N	N	C	C	N	A	A	A	A	C	C	N	C	N	A	N	C	A	C	N	A	A	A	M	A	A	A	C
5737	5737	M5737	SCSC-2_GI_5_1=S	A/G	3	CSC-2_GI_5_1=SCAFFOLD_408=GI_5_2=SCAFFOLD_435=GI_5_3=SCAFFOLD_2402=SCAFFOLD_2024=GI_5_4	2161805	+	N	G	N	A	A	A	R	N	A	G	G	N	A	N	N	G	G	N	A	A	A	A	G	G	G	G	N	A	N	G	A	G	N	A	A	A	R	A	A	A	G
5738	5738	M5738	SCSC-2_GI_5_1=S	G/C	3	CSC-2_GI_5_1=SCAFFOLD_408=GI_5_2=SCAFFOLD_435=GI_5_3=SCAFFOLD_2402=SCAFFOLD_2024=GI_5_4	2161811	+	N	C	N	G	G	G	S	N	G	C	C	N	G	N	N	C	C	N	G	G	G	G	C	C	C	C	N	G	N	C	G	C	N	G	G	G	S	G	G	G	C
5739	5739	M5739	SCSC-2_GI_5_1=S	G/T	3	CSC-2_GI_5_1=SCAFFOLD_408=GI_5_2=SCAFFOLD_435=GI_5_3=SCAFFOLD_2402=SCAFFOLD_2024=GI_5_4	2161843	+	N	T	N	G	G	G	K	N	G	T	T	N	G	N	N	T	T	N	G	G	G	G	T	T	T	T	N	G	N	T	G	T	N	G	G	G	K	G	G	G	T
5744	5744	M5744	SCSC-2_GI_5_1=S	A/G	3	CSC-2_GI_5_1=SCAFFOLD_408=GI_5_2=SCAFFOLD_435=GI_5_3=SCAFFOLD_2402=SCAFFOLD_2024=GI_5_4	2161966	+	N	G	N	A	A	A	R	N	A	G	G	N	A	N	N	G	G	N	A	A	A	A	G	G	G	G	N	A	N	G	A	G	N	A	A	A	R	A	A	A	G
5745	5745	M5745	SCSC-2_GI_5_1=S	C/A	3	CSC-2_GI_5_1=SCAFFOLD_408=GI_5_2=SCAFFOLD_435=GI_5_3=SCAFFOLD_2402=SCAFFOLD_2024=GI_5_4	2164831	+	N	A	N	C	C	C	M	N	C	A	A	N	C	N	N	A	A	N	C	C	C	C	A	A	A	A	N	C	N	A	C	A	N	C	C	C	M	C	C	C	A
5746	5746	M5746	SCSC-2_GI_5_1=S	C/A	3	CSC-2_GI_5_1=SCAFFOLD_408=GI_5_2=SCAFFOLD_435=GI_5_3=SCAFFOLD_2402=SCAFFOLD_2024=GI_5_4	2164846	+	N	A	N	C	C	C	M	N	C	A	A	N	C	N	N	A	A	N	C	C	C	C	A	A	A	A	N	C	N	A	C	A	N	C	C	C	M	C	C	C	A
5747	5747	M5747	SCSC-2_GI_5_1=S	A/G	3	CSC-2_GI_5_1=SCAFFOLD_408=GI_5_2=SCAFFOLD_435=GI_5_3=SCAFFOLD_2402=SCAFFOLD_2024=GI_5_4	2164988	+	N	G	N	A	A	A	R	N	A	G	G	N	A	N	N	G	G	N	A	A	A	A	G	G	N	G	N	A	N	G	A	G	N	A	A	A	R	A	A	A	G
5748	5748	M5748	SCSC-2_GI_5_1=S	C/T	3	CSC-2_GI_5_1=SCAFFOLD_408=GI_5_2=SCAFFOLD_435=GI_5_3=SCAFFOLD_2402=SCAFFOLD_2024=GI_5_4	2165003	+	N	T	N	C	C	C	Y	N	C	T	T	N	C	N	N	T	T	N	C	C	C	C	T	T	N	T	N	C	N	T	C	T	N	C	C	C	Y	C	C	C	T
5749	5749	M5749	SCSC-2_GI_5_1=S	T/A	3	CSC-2_GI_5_1=SCAFFOLD_408=GI_5_2=SCAFFOLD_435=GI_5_3=SCAFFOLD_2402=SCAFFOLD_2024=GI_5_4	2165025	+	N	A	N	T	T	T	W	N	T	A	A	N	T	N	N	A	A	N	T	T	T	T	A	A	N	A	N	T	N	A	T	A	N	T	T	T	W	T	T	T	A
5750	5750	M5750	SCSC-2_GI_5_1=S	C/T	3	CSC-2_GI_5_1=SCAFFOLD_408=GI_5_2=SCAFFOLD_435=GI_5_3=SCAFFOLD_2402=SCAFFOLD_2024=GI_5_4	2200282	+	N	T	N	C	C	C	Y	N	C	T	T	N	C	N	N	T	T	N	C	C	C	C	T	T	N	T	N	C	N	T	C	T	N	C	C	C	Y	C	C	C	T
5751	5751	M5751	SCSC-2_GI_5_1=S	G/A	3	CSC-2_GI_5_1=SCAFFOLD_408=GI_5_2=SCAFFOLD_435=GI_5_3=SCAFFOLD_2402=SCAFFOLD_2024=GI_5_4	2200457	+	N	A	G	G	G	G	R	N	G	A	A	N	G	N	N	A	A	N	G	G	G	G	A	A	N	A	N	G	N	A	G	A	N	G	G	G	R	G	G	G	A
5752	5752	M5752	SCSC-2_GI_5_1=S	T/G	3	CSC-2_GI_5_1=SCAFFOLD_408=GI_5_2=SCAFFOLD_435=GI_5_3=SCAFFOLD_2402=SCAFFOLD_2024=GI_5_4	2202534	+	N	G	N	T	T	T	K	N	T	G	G	N	T	N	N	G	G	N	T	T	T	G	G	G	G	G	N	T	N	G	T	G	N	T	T	T	K	T	T	T	G
5753	5753	M5753	SCSC-2_GI_5_1=S	G/T	3	CSC-2_GI_5_1=SCAFFOLD_408=GI_5_2=SCAFFOLD_435=GI_5_3=SCAFFOLD_2402=SCAFFOLD_2024=GI_5_4	2230074	+	N	T	N	G	G	G	K	N	G	T	T	N	G	N	N	T	T	N	G	G	G	T	T	T	T	T	N	G	N	T	G	T	N	G	G	G	K	G	G	G	T
5757	5757	M5757	SCSC-2_GI_5_1=S	A/G	3	CSC-2_GI_5_1=SCAFFOLD_408=GI_5_2=SCAFFOLD_435=GI_5_3=SCAFFOLD_2402=SCAFFOLD_2024=GI_5_4	2286140	+	N	G	N	A	A	A	R	N	A	G	G	N	A	N	N	G	G	N	A	A	A	G	G	G	G	A	N	A	N	G	A	G	N	A	A	A	R	A	A	A	G
5758	5758	M5758	SCSC-2_GI_5_1=S	T/G	3	CSC-2_GI_5_1=SCAFFOLD_408=GI_5_2=SCAFFOLD_435=GI_5_3=SCAFFOLD_2402=SCAFFOLD_2024=GI_5_4	2302094	+	N	G	N	T	T	T	K	N	T	G	G	N	T	N	N	G	G	N	T	T	T	G	G	G	G	T	N	T	N	G	T	G	N	T	K	T	K	T	T	T	G
5759	5759	M5759	SCSC-2_GI_5_1=S	G/A	3	CSC-2_GI_5_1=SCAFFOLD_408=GI_5_2=SCAFFOLD_435=GI_5_3=SCAFFOLD_2402=SCAFFOLD_2024=GI_5_4	2311333	+	N	A	N	G	G	G	R	N	G	A	A	N	G	N	N	A	A	N	G	G	G	A	A	A	A	G	N	G	N	A	G	A	N	G	R	A	R	G	G	G	A
5760	5760	M5760	SCSC-2_GI_5_1=S	A/C	3	CSC-2_GI_5_1=SCAFFOLD_408=GI_5_2=SCAFFOLD_435=GI_5_3=SCAFFOLD_2402=SCAFFOLD_2024=GI_5_4	2315715	+	N	C	N	A	A	A	M	N	A	C	C	N	A	N	N	C	C	N	A	A	A	C	C	C	N	A	N	A	N	C	A	C	N	A	M	C	M	A	A	A	C
5761	5761	M5761	SCSC-2_GI_5_1=S	T/C	3	CSC-2_GI_5_1=SCAFFOLD_408=GI_5_2=SCAFFOLD_435=GI_5_3=SCAFFOLD_2402=SCAFFOLD_2024=GI_5_4	2323949	+	N	C	N	T	T	T	Y	N	T	C	C	N	T	N	N	C	C	N	T	T	T	C	C	C	N	T	N	T	N	C	T	C	N	T	Y	C	Y	T	T	T	C
5762	5762	M5762	SCSC-2_GI_5_1=S	G/A	3	CSC-2_GI_5_1=SCAFFOLD_408=GI_5_2=SCAFFOLD_435=GI_5_3=SCAFFOLD_2402=SCAFFOLD_2024=GI_5_4	2337822	+	N	A	N	G	G	G	R	N	G	A	A	N	G	N	N	A	A	N	G	G	G	A	A	A	N	G	N	G	N	A	G	A	N	G	A	A	G	G	G	G	A
5763	5763	M5763	SCSC-2_GI_5_1=S	A/G	3	CSC-2_GI_5_1=SCAFFOLD_408=GI_5_2=SCAFFOLD_435=GI_5_3=SCAFFOLD_2402=SCAFFOLD_2024=GI_5_4	2337824	+	N	G	N	A	A	A	R	N	A	G	G	N	A	N	N	G	G	N	A	A	A	G	G	G	N	A	N	A	N	G	A	G	N	A	G	G	A	A	A	A	G
5764	5764	M5764	SCSC-2_GI_5_1=S	A/C	3	CSC-2_GI_5_1=SCAFFOLD_408=GI_5_2=SCAFFOLD_435=GI_5_3=SCAFFOLD_2402=SCAFFOLD_2024=GI_5_4	2337842	+	N	C	N	A	A	A	M	N	A	C	C	N	A	N	N	C	C	N	A	A	A	C	C	C	N	A	N	A	N	C	A	C	N	A	C	C	A	A	A	A	C
5765	5765	M5765	SCSC-2_GI_5_1=S	G/A	3	CSC-2_GI_5_1=SCAFFOLD_408=GI_5_2=SCAFFOLD_435=GI_5_3=SCAFFOLD_2402=SCAFFOLD_2024=GI_5_4	2393199	+	N	A	N	G	G	G	R	N	G	N	A	N	G	N	N	A	A	N	G	G	G	A	A	A	N	G	N	G	N	A	G	A	N	G	A	A	R	G	G	G	A
5766	5766	M5766	SCSC-2_GI_5_1=S	C/G	3	CSC-2_GI_5_1=SCAFFOLD_408=GI_5_2=SCAFFOLD_435=GI_5_3=SCAFFOLD_2402=SCAFFOLD_2024=GI_5_4	2393205	+	N	G	N	C	C	C	S	N	C	N	G	N	C	N	N	G	G	N	C	C	C	G	G	G	N	C	N	C	N	G	C	G	N	C	G	G	S	C	C	C	G
5767	5767	M5767	SCSC-2_GI_5_1=S	T/C	3	CSC-2_GI_5_1=SCAFFOLD_408=GI_5_2=SCAFFOLD_435=GI_5_3=SCAFFOLD_2402=SCAFFOLD_2024=GI_5_4	2393207	+	N	C	N	T	T	T	Y	N	T	N	C	N	T	N	N	C	C	N	T	T	T	C	C	C	N	T	N	T	N	C	T	C	N	T	C	C	Y	T	T	T	C
5768	5768	M5768	SCSC-2_GI_5_1=S	A/T	3	CSC-2_GI_5_1=SCAFFOLD_408=GI_5_2=SCAFFOLD_435=GI_5_3=SCAFFOLD_2402=SCAFFOLD_2024=GI_5_4	2393258	+	N	T	N	A	A	A	W	N	A	T	T	N	A	N	N	T	T	N	A	A	A	T	T	T	N	A	N	A	N	T	A	T	N	A	T	T	W	A	A	A	T
5769	5769	M5769	SCSC-2_GI_5_1=S	T/A	3	CSC-2_GI_5_1=SCAFFOLD_408=GI_5_2=SCAFFOLD_435=GI_5_3=SCAFFOLD_2402=SCAFFOLD_2024=GI_5_4	2393267	+	N	A	N	T	T	T	W	N	T	A	A	N	T	N	N	A	A	N	T	T	T	A	A	A	N	T	N	T	N	A	T	A	N	T	A	A	W	T	T	T	A
5775	5775	M5775	SCSC-2_GI_5_1=S	C/T	3	CSC-2_GI_5_1=SCAFFOLD_408=GI_5_2=SCAFFOLD_435=GI_5_3=SCAFFOLD_2402=SCAFFOLD_2024=GI_5_4	2436409	+	N	T	N	C	C	C	Y	N	C	T	T	N	C	N	N	T	T	N	C	C	C	C	T	T	N	C	N	C	N	T	C	T	N	C	T	T	Y	C	C	C	T
5776	5776	M5776	SCSC-2_GI_5_1=S	T/G	3	CSC-2_GI_5_1=SCAFFOLD_408=GI_5_2=SCAFFOLD_435=GI_5_3=SCAFFOLD_2402=SCAFFOLD_2024=GI_5_4	2436417	+	N	G	N	T	T	T	K	N	T	G	G	N	T	N	N	G	G	N	T	T	T	T	G	G	N	T	N	T	N	G	T	G	N	T	G	G	K	T	T	T	G
5777	5777	M5777	SCSC-2_GI_5_1=S	T/G	3	CSC-2_GI_5_1=SCAFFOLD_408=GI_5_2=SCAFFOLD_435=GI_5_3=SCAFFOLD_2402=SCAFFOLD_2024=GI_5_4	2436429	+	N	G	N	T	T	T	K	N	T	G	G	N	T	N	N	G	G	N	T	T	T	T	G	G	N	T	N	T	N	G	T	G	N	T	G	G	K	T	T	T	G
5778	5778	M5778	SCSC-2_GI_5_1=S	G/A	3	CSC-2_GI_5_1=SCAFFOLD_408=GI_5_2=SCAFFOLD_435=GI_5_3=SCAFFOLD_2402=SCAFFOLD_2024=GI_5_4	2436443	+	N	A	N	G	G	G	R	N	G	A	A	N	G	N	N	A	A	N	G	G	G	G	A	A	N	G	N	G	N	A	G	A	N	G	A	A	R	G	G	G	A
5779	5779	M5779	SCSC-2_GI_5_1=S	G/T	3	CSC-2_GI_5_1=SCAFFOLD_408=GI_5_2=SCAFFOLD_435=GI_5_3=SCAFFOLD_2402=SCAFFOLD_2024=GI_5_4	2458787	+	N	T	N	G	G	G	K	N	G	T	T	N	G	N	N	T	T	N	T	G	G	G	T	T	T	G	N	K	N	T	T	T	N	G	T	T	G	G	G	G	T
5780	5780	M5780	SCSC-2_GI_5_1=S	T/C	3	CSC-2_GI_5_1=SCAFFOLD_408=GI_5_2=SCAFFOLD_435=GI_5_3=SCAFFOLD_2402=SCAFFOLD_2024=GI_5_4	2465444	+	T	C	N	T	T	T	Y	N	T	C	C	N	T	N	N	C	C	N	C	T	T	T	C	C	C	T	N	Y	N	C	C	C	N	T	C	C	T	T	T	T	C
5781	5781	M5781	SCSC-2_GI_5_1=S	A/T	3	CSC-2_GI_5_1=SCAFFOLD_408=GI_5_2=SCAFFOLD_435=GI_5_3=SCAFFOLD_2402=SCAFFOLD_2024=GI_5_4	2523409	+	N	T	N	A	A	A	W	N	A	T	T	N	A	N	N	T	T	N	T	A	A	A	T	T	N	A	N	W	N	T	T	T	N	A	T	T	A	A	A	A	T
5782	5782	M5782	SCSC-2_GI_5_1=S	A/T	3	CSC-2_GI_5_1=SCAFFOLD_408=GI_5_2=SCAFFOLD_435=GI_5_3=SCAFFOLD_2402=SCAFFOLD_2024=GI_5_4	2523412	+	N	T	N	A	A	A	W	N	A	T	T	N	A	N	N	T	T	N	T	A	A	A	T	T	N	A	N	W	N	T	T	T	N	A	T	T	A	A	A	A	T
5786	5786	M5786	SCSC-2_GI_5_1=S	A/T	3	CSC-2_GI_5_1=SCAFFOLD_408=GI_5_2=SCAFFOLD_435=GI_5_3=SCAFFOLD_2402=SCAFFOLD_2024=GI_5_4	2630426	+	N	T	N	A	A	A	T	N	A	T	T	N	A	N	N	T	T	N	T	A	A	A	T	T	N	A	N	W	N	T	T	T	N	A	T	T	A	A	A	A	T
5787	5787	M5787	SCSC-2_GI_5_1=S	G/T	3	CSC-2_GI_5_1=SCAFFOLD_408=GI_5_2=SCAFFOLD_435=GI_5_3=SCAFFOLD_2402=SCAFFOLD_2024=GI_5_4	2635909	+	N	T	N	G	G	G	T	N	G	T	T	N	G	N	N	T	G	N	T	G	G	G	T	T	T	G	N	K	N	T	T	T	N	G	T	T	G	G	G	G	T
5788	5788	M5788	SCSC-2_GI_5_1=S	C/T	3	CSC-2_GI_5_1=SCAFFOLD_408=GI_5_2=SCAFFOLD_435=GI_5_3=SCAFFOLD_2402=SCAFFOLD_2024=GI_5_4	2635916	+	N	T	N	C	C	C	T	N	C	T	T	N	C	N	N	T	C	N	T	C	C	C	T	T	T	C	N	Y	N	T	T	T	N	C	T	T	C	C	C	C	T
5789	5789	M5789	SCSC-2_GI_5_1=S	A/G	3	CSC-2_GI_5_1=SCAFFOLD_408=GI_5_2=SCAFFOLD_435=GI_5_3=SCAFFOLD_2402=SCAFFOLD_2024=GI_5_4	2635935	+	N	G	N	A	A	A	G	N	A	G	G	N	A	N	N	G	A	N	G	A	A	A	G	G	G	A	N	R	N	G	G	G	N	A	G	G	A	A	A	A	G
5790	5790	M5790	SCSC-2_GI_5_1=S	T/C	3	CSC-2_GI_5_1=SCAFFOLD_408=GI_5_2=SCAFFOLD_435=GI_5_3=SCAFFOLD_2402=SCAFFOLD_2024=GI_5_4	2635952	+	N	C	N	T	T	T	C	N	T	C	C	N	T	N	N	C	T	N	C	T	T	T	C	C	C	T	N	Y	N	C	C	C	N	T	C	C	T	T	T	T	C
5791	5791	M5791	SCSC-2_GI_5_1=S	G/A	3	CSC-2_GI_5_1=SCAFFOLD_408=GI_5_2=SCAFFOLD_435=GI_5_3=SCAFFOLD_2402=SCAFFOLD_2024=GI_5_4	2639252	+	N	A	N	G	G	G	A	N	G	A	A	N	G	N	N	A	G	N	A	G	G	G	A	A	N	G	N	R	N	A	A	A	N	G	A	A	G	G	G	G	A
5793	5793	M5793	SCSC-2_GI_5_1=S	A/G	3	CSC-2_GI_5_1=SCAFFOLD_408=GI_5_2=SCAFFOLD_435=GI_5_3=SCAFFOLD_2402=SCAFFOLD_2024=GI_5_4	2715595	+	N	G	N	A	A	A	G	N	A	G	G	A	A	N	N	G	A	N	G	A	A	A	G	G	G	A	N	R	N	G	G	G	N	A	G	G	A	A	A	A	G
5794	5794	M5794	SCSC-2_GI_5_1=S	T/C	3	CSC-2_GI_5_1=SCAFFOLD_408=GI_5_2=SCAFFOLD_435=GI_5_3=SCAFFOLD_2402=SCAFFOLD_2024=GI_5_4	2715601	+	N	C	N	T	T	T	C	N	T	C	C	T	T	N	N	C	T	N	C	T	T	T	C	C	C	T	N	Y	N	C	C	C	N	T	C	C	T	T	T	T	C
5795	5795	M5795	SCSC-2_GI_5_1=S	A/G	3	CSC-2_GI_5_1=SCAFFOLD_408=GI_5_2=SCAFFOLD_435=GI_5_3=SCAFFOLD_2402=SCAFFOLD_2024=GI_5_4	2715607	+	N	G	N	A	A	A	G	N	A	G	G	A	A	N	N	G	A	N	G	A	A	A	G	G	G	A	N	R	N	G	G	G	N	A	G	G	A	A	A	A	G
5796	5796	M5796	SCSC-2_GI_5_1=S	C/T	3	CSC-2_GI_5_1=SCAFFOLD_408=GI_5_2=SCAFFOLD_435=GI_5_3=SCAFFOLD_2402=SCAFFOLD_2024=GI_5_4	2716006	+	N	T	N	C	C	C	T	N	C	T	T	N	C	N	N	T	C	N	T	C	C	C	T	T	N	C	N	Y	N	T	T	T	N	C	T	T	C	C	C	C	T
5797	5797	M5797	SCSC-2_GI_5_1=S	C/A	3	CSC-2_GI_5_1=SCAFFOLD_408=GI_5_2=SCAFFOLD_435=GI_5_3=SCAFFOLD_2402=SCAFFOLD_2024=GI_5_4	2716084	+	C	A	N	C	C	C	A	N	C	A	A	N	C	N	N	A	C	N	A	C	C	C	A	A	A	C	N	M	N	A	A	A	N	C	A	A	C	C	C	C	A
5798	5798	M5798	SCSC-2_GI_5_1=S	C/T	3	CSC-2_GI_5_1=SCAFFOLD_408=GI_5_2=SCAFFOLD_435=GI_5_3=SCAFFOLD_2402=SCAFFOLD_2024=GI_5_4	2731886	+	N	T	N	C	C	C	T	N	C	T	T	N	C	N	N	T	C	N	T	C	C	C	T	T	T	C	N	Y	N	T	T	T	N	C	T	T	C	C	C	C	T
5799	5799	M5799	SCSC-2_GI_5_1=S	T/C	3	CSC-2_GI_5_1=SCAFFOLD_408=GI_5_2=SCAFFOLD_435=GI_5_3=SCAFFOLD_2402=SCAFFOLD_2024=GI_5_4	2748207	+	N	C	N	T	T	T	C	N	T	C	C	N	T	N	N	C	T	N	C	T	T	T	C	C	N	T	N	Y	N	C	C	C	N	T	C	C	T	T	N	T	C
5800	5800	M5800	SCSC-2_GI_5_1=S	A/G	3	CSC-2_GI_5_1=SCAFFOLD_408=GI_5_2=SCAFFOLD_435=GI_5_3=SCAFFOLD_2402=SCAFFOLD_2024=GI_5_4	2748233	+	N	G	N	A	A	A	G	N	A	G	G	N	A	N	N	G	A	N	G	A	A	A	G	G	N	A	N	R	N	G	G	G	N	A	G	G	A	A	N	A	G
5801	5801	M5801	SCSC-2_GI_5_1=S	C/T	3	CSC-2_GI_5_1=SCAFFOLD_408=GI_5_2=SCAFFOLD_435=GI_5_3=SCAFFOLD_2402=SCAFFOLD_2024=GI_5_4	2748235	+	N	T	N	C	C	C	T	N	C	T	T	N	C	N	N	T	C	N	T	C	C	C	T	T	N	C	N	Y	N	T	T	T	N	C	T	T	C	C	N	C	T
5802	5802	M5802	SCSC-2_GI_5_1=S	A/G	3	CSC-2_GI_5_1=SCAFFOLD_408=GI_5_2=SCAFFOLD_435=GI_5_3=SCAFFOLD_2402=SCAFFOLD_2024=GI_5_4	2748262	+	N	G	N	A	A	A	G	N	A	G	G	N	A	N	N	G	A	N	G	A	A	A	G	G	N	A	N	R	N	G	G	G	N	A	G	G	A	A	N	A	G
5803	5803	M5803	SCSC-2_GI_5_1=S	C/A	3	CSC-2_GI_5_1=SCAFFOLD_408=GI_5_2=SCAFFOLD_435=GI_5_3=SCAFFOLD_2402=SCAFFOLD_2024=GI_5_4	2780953	+	N	A	N	C	C	N	A	N	C	A	A	N	C	N	N	A	C	N	A	C	C	C	A	A	A	C	N	M	N	A	A	A	N	C	A	A	C	C	C	C	A
5804	5804	M5804	SCSC-2_GI_5_1=S	A/G	3	CSC-2_GI_5_1=SCAFFOLD_408=GI_5_2=SCAFFOLD_435=GI_5_3=SCAFFOLD_2402=SCAFFOLD_2024=GI_5_4	2780984	+	N	G	N	A	A	N	G	N	A	G	G	N	A	N	N	G	A	N	G	A	A	A	G	G	G	A	N	R	N	G	G	G	N	A	G	G	A	A	A	A	G
5805	5805	M5805	SCSC-2_GI_5_1=S	C/A	3	CSC-2_GI_5_1=SCAFFOLD_408=GI_5_2=SCAFFOLD_435=GI_5_3=SCAFFOLD_2402=SCAFFOLD_2024=GI_5_4	2781057	+	N	A	N	C	C	C	A	N	C	A	A	N	C	N	N	A	C	N	A	C	C	C	A	A	N	C	N	M	N	A	A	A	N	C	A	A	C	C	C	C	A
5806	5806	M5806	SCSC-2_GI_5_1=S	T/C	3	CSC-2_GI_5_1=SCAFFOLD_408=GI_5_2=SCAFFOLD_435=GI_5_3=SCAFFOLD_2402=SCAFFOLD_2024=GI_5_4	2781058	+	N	C	N	T	T	T	C	N	T	C	C	N	T	N	N	C	T	N	C	T	T	T	C	C	N	T	N	Y	N	C	C	C	N	T	C	C	T	T	T	T	C
5807	5807	M5807	SCSC-2_GI_5_1=S	A/T	3	CSC-2_GI_5_1=SCAFFOLD_408=GI_5_2=SCAFFOLD_435=GI_5_3=SCAFFOLD_2402=SCAFFOLD_2024=GI_5_4	2781059	+	N	T	N	A	A	A	T	N	A	T	T	N	A	N	N	T	A	N	T	A	A	A	T	T	N	A	N	W	N	T	T	T	N	A	T	T	A	A	A	A	T
5808	5808	M5808	SCSC-2_GI_5_1=S	C/G	3	CSC-2_GI_5_1=SCAFFOLD_408=GI_5_2=SCAFFOLD_435=GI_5_3=SCAFFOLD_2402=SCAFFOLD_2024=GI_5_4	2783050	+	N	G	N	C	C	C	G	N	C	G	G	N	C	N	N	G	C	N	G	C	C	C	G	G	G	C	N	S	N	G	G	G	N	C	G	G	C	C	C	C	G
5809	5809	M5809	SCSC-2_GI_5_1=S	C/T	3	CSC-2_GI_5_1=SCAFFOLD_408=GI_5_2=SCAFFOLD_435=GI_5_3=SCAFFOLD_2402=SCAFFOLD_2024=GI_5_4	2783530	+	N	T	N	C	C	C	T	N	C	T	T	N	C	N	N	T	C	N	T	C	C	C	T	T	T	C	N	Y	N	T	T	T	N	C	T	T	C	C	C	C	T
5810	5810	M5810	SCSC-2_GI_5_1=S	G/A	3	CSC-2_GI_5_1=SCAFFOLD_408=GI_5_2=SCAFFOLD_435=GI_5_3=SCAFFOLD_2402=SCAFFOLD_2024=GI_5_4	2908499	+	N	A	N	G	G	G	A	N	G	A	A	N	G	N	N	A	R	N	A	G	G	G	A	A	N	G	N	R	N	A	A	A	N	G	A	A	G	G	G	G	G
5811	5811	M5811	SCSC-2_GI_5_1=S	G/T	3	CSC-2_GI_5_1=SCAFFOLD_408=GI_5_2=SCAFFOLD_435=GI_5_3=SCAFFOLD_2402=SCAFFOLD_2024=GI_5_4	2908502	+	N	T	N	G	G	G	T	N	G	T	T	N	G	N	N	T	K	N	T	G	G	G	T	T	N	G	N	K	N	T	T	T	N	G	T	T	G	G	G	G	G
5812	5812	M5812	SCSC-2_GI_5_1=S	A/C	3	CSC-2_GI_5_1=SCAFFOLD_408=GI_5_2=SCAFFOLD_435=GI_5_3=SCAFFOLD_2402=SCAFFOLD_2024=GI_5_4	2908517	+	N	C	N	A	A	A	C	N	A	C	C	N	A	N	N	C	M	N	C	A	A	A	C	C	N	A	N	M	N	C	C	C	N	A	C	C	A	A	A	A	A
5813	5813	M5813	SCSC-2_GI_5_1=S	A/T	3	CSC-2_GI_5_1=SCAFFOLD_408=GI_5_2=SCAFFOLD_435=GI_5_3=SCAFFOLD_2402=SCAFFOLD_2024=GI_5_4	2908780	+	N	T	N	A	A	A	T	N	A	T	T	N	A	N	N	T	A	N	T	A	A	A	T	T	T	A	N	W	N	T	T	T	N	A	T	T	A	A	A	A	A
5814	5814	M5814	SCSC-2_GI_5_1=S	C/T	3	CSC-2_GI_5_1=SCAFFOLD_408=GI_5_2=SCAFFOLD_435=GI_5_3=SCAFFOLD_2402=SCAFFOLD_2024=GI_5_4	2908787	+	N	T	N	C	C	C	T	N	C	T	T	N	C	N	N	T	C	N	T	C	C	C	T	T	T	C	N	Y	N	T	T	T	N	C	T	T	C	C	C	C	C
5815	5815	M5815	SCSC-2_GI_5_1=S	C/G	3	CSC-2_GI_5_1=SCAFFOLD_408=GI_5_2=SCAFFOLD_435=GI_5_3=SCAFFOLD_2402=SCAFFOLD_2024=GI_5_4	2909694	+	N	G	N	C	C	C	G	N	C	G	G	N	C	N	N	G	N	N	G	C	C	C	G	G	G	C	N	S	N	G	G	G	N	C	G	G	C	C	C	C	C
5816	5816	M5816	SCSC-2_GI_5_1=S	C/A	3	CSC-2_GI_5_1=SCAFFOLD_408=GI_5_2=SCAFFOLD_435=GI_5_3=SCAFFOLD_2402=SCAFFOLD_2024=GI_5_4	2909697	+	N	A	N	C	C	C	A	N	C	A	A	N	C	N	N	A	N	N	A	C	C	C	A	A	A	C	N	M	N	A	A	A	N	C	A	A	C	C	C	C	C
5817	5817	M5817	SCSC-2_GI_5_1=S	G/C	3	CSC-2_GI_5_1=SCAFFOLD_408=GI_5_2=SCAFFOLD_435=GI_5_3=SCAFFOLD_2402=SCAFFOLD_2024=GI_5_4	2909709	+	N	C	N	G	G	G	C	N	G	C	C	N	G	N	N	C	N	N	C	G	G	G	C	C	C	G	N	S	N	C	C	C	N	G	C	C	G	G	G	G	G
5818	5818	M5818	SCSC-2_GI_5_1=S	G/C	3	CSC-2_GI_5_1=SCAFFOLD_408=GI_5_2=SCAFFOLD_435=GI_5_3=SCAFFOLD_2402=SCAFFOLD_2024=GI_5_4	2909936	+	N	C	G	G	G	G	C	N	G	C	C	N	G	N	N	C	G	N	C	G	G	G	C	C	N	G	N	S	N	C	C	C	N	G	C	C	G	G	G	G	G
5819	5819	M5819	SCSC-2_GI_5_1=S	A/C	3	CSC-2_GI_5_1=SCAFFOLD_408=GI_5_2=SCAFFOLD_435=GI_5_3=SCAFFOLD_2402=SCAFFOLD_2024=GI_5_4	2911184	+	N	C	N	A	A	A	C	N	A	C	C	N	A	N	N	C	A	N	C	A	A	A	C	C	C	A	N	M	N	C	C	C	N	A	C	C	A	A	A	A	A
5820	5820	M5820	SCSC-2_GI_5_1=S	G/C	3	CSC-2_GI_5_1=SCAFFOLD_408=GI_5_2=SCAFFOLD_435=GI_5_3=SCAFFOLD_2402=SCAFFOLD_2024=GI_5_4	2911202	+	N	C	N	G	G	G	C	N	G	C	C	N	G	N	N	C	G	N	C	G	G	G	C	C	C	G	N	S	N	C	C	C	N	G	C	C	G	G	G	G	G
5821	5821	M5821	SCSC-2_GI_5_1=S	C/A	3	CSC-2_GI_5_1=SCAFFOLD_408=GI_5_2=SCAFFOLD_435=GI_5_3=SCAFFOLD_2402=SCAFFOLD_2024=GI_5_4	2936193	+	N	A	N	C	C	C	A	N	C	A	A	N	C	N	N	A	C	N	A	C	C	C	A	A	N	C	N	M	N	A	A	A	N	C	A	A	C	C	C	C	C
5822	5822	M5822	SCSC-2_GI_5_1=S	G/A	3	CSC-2_GI_5_1=SCAFFOLD_408=GI_5_2=SCAFFOLD_435=GI_5_3=SCAFFOLD_2402=SCAFFOLD_2024=GI_5_4	2940482	+	N	A	N	G	G	G	A	N	G	A	A	N	G	N	N	A	G	N	A	G	G	G	A	A	A	G	N	R	N	A	A	A	N	G	A	A	G	G	G	G	G
5823	5823	M5823	SCSC-2_GI_5_1=S	G/A	3	CSC-2_GI_5_1=SCAFFOLD_408=GI_5_2=SCAFFOLD_435=GI_5_3=SCAFFOLD_2402=SCAFFOLD_2024=GI_5_4	2940488	+	N	A	N	G	G	G	A	N	G	A	A	N	G	N	N	A	G	N	A	G	G	G	A	A	A	G	N	R	N	A	A	A	N	G	A	A	G	G	G	G	G
5824	5824	M5824	SCSC-2_GI_5_1=S	T/C	3	CSC-2_GI_5_1=SCAFFOLD_408=GI_5_2=SCAFFOLD_435=GI_5_3=SCAFFOLD_2402=SCAFFOLD_2024=GI_5_4	2941849	+	T	C	N	T	T	T	C	N	T	C	C	N	T	N	N	C	T	N	C	T	T	T	C	C	C	T	N	Y	N	C	C	C	N	T	C	C	T	T	T	T	T
5825	5825	M5825	SCSC-2_GI_5_1=S	A/T	3	CSC-2_GI_5_1=SCAFFOLD_408=GI_5_2=SCAFFOLD_435=GI_5_3=SCAFFOLD_2402=SCAFFOLD_2024=GI_5_4	2941855	+	A	T	N	A	A	A	T	N	A	T	T	N	A	N	N	T	A	N	T	A	A	A	T	T	T	A	N	W	N	T	T	T	N	A	T	T	A	A	A	A	A
5826	5826	M5826	SCSC-2_GI_5_1=S	T/A	3	CSC-2_GI_5_1=SCAFFOLD_408=GI_5_2=SCAFFOLD_435=GI_5_3=SCAFFOLD_2402=SCAFFOLD_2024=GI_5_4	2976707	+	N	A	N	T	T	T	A	N	T	A	A	N	T	N	N	A	T	N	A	T	T	T	A	A	A	T	N	W	N	A	A	A	N	T	A	A	T	T	T	T	T
5827	5827	M5827	SCSC-2_GI_5_1=S	G/A	3	CSC-2_GI_5_1=SCAFFOLD_408=GI_5_2=SCAFFOLD_435=GI_5_3=SCAFFOLD_2402=SCAFFOLD_2024=GI_5_4	2986424	+	N	A	N	G	G	G	A	N	G	A	A	N	G	N	N	A	G	N	A	G	G	G	A	A	N	G	N	R	N	A	A	A	N	G	A	A	G	G	G	G	G
5828	5828	M5828	SCSC-2_GI_5_1=S	C/T	3	CSC-2_GI_5_1=SCAFFOLD_408=GI_5_2=SCAFFOLD_435=GI_5_3=SCAFFOLD_2402=SCAFFOLD_2024=GI_5_4	2994233	+	N	T	N	C	C	C	T	N	C	T	T	N	C	N	N	T	C	N	T	C	C	C	T	T	T	C	N	Y	N	T	T	T	N	C	T	T	C	C	C	C	C
5829	5829	M5829	SCSC-2_GI_5_1=S	C/G	3	CSC-2_GI_5_1=SCAFFOLD_408=GI_5_2=SCAFFOLD_435=GI_5_3=SCAFFOLD_2402=SCAFFOLD_2024=GI_5_4	2999907	+	N	G	N	C	C	C	G	N	C	G	G	N	C	N	N	G	C	N	G	C	C	C	G	G	N	C	N	S	N	G	G	G	N	C	G	G	C	C	C	C	C
5830	5830	M5830	SCSC-2_GI_5_1=S	C/T	3	CSC-2_GI_5_1=SCAFFOLD_408=GI_5_2=SCAFFOLD_435=GI_5_3=SCAFFOLD_2402=SCAFFOLD_2024=GI_5_4	2999944	+	N	T	N	C	C	C	T	N	C	T	T	N	C	N	N	T	C	N	T	C	C	C	T	T	N	C	N	Y	N	T	T	T	N	C	T	T	C	C	C	C	C
5831	5831	M5831	SCSC-2_GI_5_1=S	A/G	3	CSC-2_GI_5_1=SCAFFOLD_408=GI_5_2=SCAFFOLD_435=GI_5_3=SCAFFOLD_2402=SCAFFOLD_2024=GI_5_4	2999999	+	A	G	N	A	A	A	G	N	A	G	G	N	A	N	N	G	A	N	G	A	A	A	G	G	N	A	N	R	N	G	G	G	N	A	G	G	A	A	A	A	A
5832	5832	M5832	SCSC-2_GI_5_1=S	G/T	3	CSC-2_GI_5_1=SCAFFOLD_408=GI_5_2=SCAFFOLD_435=GI_5_3=SCAFFOLD_2402=SCAFFOLD_2024=GI_5_4	3000002	+	G	T	N	G	G	G	T	N	G	T	T	N	G	N	N	T	G	N	T	G	G	G	T	T	N	G	N	K	N	T	T	T	N	G	T	T	G	G	G	G	G
5833	5833	M5833	SCSC-2_GI_5_1=S	A/G	3	CSC-2_GI_5_1=SCAFFOLD_408=GI_5_2=SCAFFOLD_435=GI_5_3=SCAFFOLD_2402=SCAFFOLD_2024=GI_5_4	3000985	+	N	G	N	A	A	A	G	N	A	G	G	N	A	N	N	G	A	N	G	A	A	A	G	G	N	A	N	R	N	G	G	G	N	A	G	G	A	A	A	A	A
5834	5834	M5834	SCSC-2_GI_5_1=S	A/C	3	CSC-2_GI_5_1=SCAFFOLD_408=GI_5_2=SCAFFOLD_435=GI_5_3=SCAFFOLD_2402=SCAFFOLD_2024=GI_5_4	3001259	+	N	C	N	A	A	A	C	N	A	C	C	N	A	N	N	C	A	N	C	A	A	A	C	C	N	A	N	M	N	C	C	C	N	A	C	C	A	A	A	A	A
5835	5835	M5835	SCSC-2_GI_5_1=S	A/G	3	CSC-2_GI_5_1=SCAFFOLD_408=GI_5_2=SCAFFOLD_435=GI_5_3=SCAFFOLD_2402=SCAFFOLD_2024=GI_5_4	3001273	+	N	G	N	A	A	A	G	N	A	G	G	N	A	N	N	G	A	N	G	A	A	A	G	G	N	A	N	R	N	G	G	G	N	A	G	G	A	A	A	A	A
5836	5836	M5836	SCSC-2_GI_5_1=S	C/T	3	CSC-2_GI_5_1=SCAFFOLD_408=GI_5_2=SCAFFOLD_435=GI_5_3=SCAFFOLD_2402=SCAFFOLD_2024=GI_5_4	3055792	+	N	T	N	C	C	C	T	N	C	T	T	N	C	N	N	T	C	N	T	C	C	C	T	T	T	C	N	Y	N	T	C	T	N	C	T	T	C	C	C	C	C
5837	5837	M5837	SCSC-2_GI_5_1=S	C/G	3	CSC-2_GI_5_1=SCAFFOLD_408=GI_5_2=SCAFFOLD_435=GI_5_3=SCAFFOLD_2402=SCAFFOLD_2024=GI_5_4	3076918	+	N	G	N	C	C	N	G	N	C	G	G	N	C	N	N	G	C	N	G	C	C	C	G	G	N	C	N	S	N	G	C	C	N	C	G	G	C	C	C	C	C
5838	5838	M5838	SCSC-2_GI_5_1=S	G/A	3	CSC-2_GI_5_1=SCAFFOLD_408=GI_5_2=SCAFFOLD_435=GI_5_3=SCAFFOLD_2402=SCAFFOLD_2024=GI_5_4	3097720	+	N	A	N	G	G	G	A	N	G	A	A	N	G	N	N	A	G	N	A	G	G	G	A	A	A	G	N	R	N	A	G	G	N	G	A	A	G	G	G	G	G
5840	5840	M5840	SCSC-2_GI_5_1=S	A/C	3	CSC-2_GI_5_1=SCAFFOLD_408=GI_5_2=SCAFFOLD_435=GI_5_3=SCAFFOLD_2402=SCAFFOLD_2024=GI_5_4	3097722	+	N	C	N	A	A	A	C	N	A	C	C	N	A	N	N	C	A	N	C	A	A	A	C	C	C	A	N	M	N	C	A	A	N	A	C	C	A	A	A	A	A
5841	5841	M5841	SCSC-2_GI_5_1=S	C/A	3	CSC-2_GI_5_1=SCAFFOLD_408=GI_5_2=SCAFFOLD_435=GI_5_3=SCAFFOLD_2402=SCAFFOLD_2024=GI_5_4	3097723	+	N	A	N	C	C	C	A	N	C	A	A	N	C	N	N	A	C	N	A	C	C	C	A	A	A	C	N	M	N	A	C	C	N	C	A	A	C	C	C	C	C
5842	5842	M5842	SCSC-2_GI_5_1=S	T/A	3	CSC-2_GI_5_1=SCAFFOLD_408=GI_5_2=SCAFFOLD_435=GI_5_3=SCAFFOLD_2402=SCAFFOLD_2024=GI_5_4	3117565	+	N	A	N	T	T	T	A	N	T	A	A	N	A	N	N	A	T	N	A	T	T	T	A	A	A	T	N	W	N	A	T	T	N	T	A	A	T	T	T	T	T
5843	5843	M5843	SCSC-2_GI_5_1=S	T/C	3	CSC-2_GI_5_1=SCAFFOLD_408=GI_5_2=SCAFFOLD_435=GI_5_3=SCAFFOLD_2402=SCAFFOLD_2024=GI_5_4	3137352	+	N	C	N	T	T	T	C	N	T	C	C	N	C	N	N	T	T	N	C	T	T	T	C	C	N	T	N	Y	N	C	T	T	N	T	C	C	T	T	T	T	T
5844	5844	M5844	SCSC-2_GI_5_1=S	G/T	3	CSC-2_GI_5_1=SCAFFOLD_408=GI_5_2=SCAFFOLD_435=GI_5_3=SCAFFOLD_2402=SCAFFOLD_2024=GI_5_4	3140024	+	N	T	N	G	G	G	T	N	G	T	T	N	T	N	N	G	G	N	T	G	G	G	T	T	T	G	N	K	N	T	G	G	N	G	T	T	G	G	G	G	G
5845	5845	M5845	SCSC-2_GI_5_1=S	T/C	3	CSC-2_GI_5_1=SCAFFOLD_408=GI_5_2=SCAFFOLD_435=GI_5_3=SCAFFOLD_2402=SCAFFOLD_2024=GI_5_4	3140030	+	N	C	N	T	T	T	C	N	T	C	C	N	C	N	N	T	T	N	C	T	T	T	C	C	C	T	N	Y	N	C	T	T	N	T	C	C	T	T	T	T	T
5846	5846	M5846	SCSC-2_GI_5_1=S	C/G	3	CSC-2_GI_5_1=SCAFFOLD_408=GI_5_2=SCAFFOLD_435=GI_5_3=SCAFFOLD_2402=SCAFFOLD_2024=GI_5_4	3140038	+	N	G	N	C	C	C	G	N	C	G	G	N	G	N	N	C	C	N	G	C	C	C	G	G	G	C	N	S	N	G	C	C	N	C	G	G	C	C	C	C	C
5847	5847	M5847	SCSC-2_GI_5_1=S	A/C	3	CSC-2_GI_5_1=SCAFFOLD_408=GI_5_2=SCAFFOLD_435=GI_5_3=SCAFFOLD_2402=SCAFFOLD_2024=GI_5_4	3144549	+	N	C	N	A	A	A	C	N	A	C	C	N	C	N	N	A	A	N	C	A	A	A	C	C	C	A	N	M	N	C	A	A	N	A	C	C	A	A	A	A	A
5848	5848	M5848	SCSC-2_GI_5_1=S	C/T	3	CSC-2_GI_5_1=SCAFFOLD_408=GI_5_2=SCAFFOLD_435=GI_5_3=SCAFFOLD_2402=SCAFFOLD_2024=GI_5_4	3145588	+	N	T	N	C	C	C	T	N	C	T	T	N	T	N	N	C	C	N	T	C	C	C	T	T	N	C	N	Y	N	T	C	C	N	C	T	T	C	C	C	C	C
5849	5849	M5849	SCSC-2_GI_5_1=S	A/G	3	CSC-2_GI_5_1=SCAFFOLD_408=GI_5_2=SCAFFOLD_435=GI_5_3=SCAFFOLD_2402=SCAFFOLD_2024=GI_5_4	3189059	+	N	G	N	A	A	A	G	N	A	G	G	N	G	N	N	A	A	N	G	A	A	A	G	G	G	A	N	R	N	G	A	A	N	A	G	G	A	A	A	A	A
5850	5850	M5850	SCSC-2_GI_5_1=S	T/A	3	CSC-2_GI_5_1=SCAFFOLD_408=GI_5_2=SCAFFOLD_435=GI_5_3=SCAFFOLD_2402=SCAFFOLD_2024=GI_5_4	3189062	+	N	A	N	T	T	T	A	N	T	A	A	N	A	N	N	T	T	N	A	T	T	T	A	A	A	T	N	W	N	A	T	T	N	T	A	A	T	T	T	T	T
5851	5851	M5851	SCSC-2_GI_5_1=S	G/C	3	CSC-2_GI_5_1=SCAFFOLD_408=GI_5_2=SCAFFOLD_435=GI_5_3=SCAFFOLD_2402=SCAFFOLD_2024=GI_5_4	3189068	+	N	C	N	G	G	G	C	N	G	C	C	N	C	N	N	G	G	N	C	G	G	G	C	C	C	G	N	S	N	C	G	G	N	G	C	C	G	G	G	G	G
5852	5852	M5852	SCSC-2_GI_5_1=S	T/C	3	CSC-2_GI_5_1=SCAFFOLD_408=GI_5_2=SCAFFOLD_435=GI_5_3=SCAFFOLD_2402=SCAFFOLD_2024=GI_5_4	3217125	+	N	C	N	T	T	T	C	N	T	C	C	N	C	N	N	T	T	N	C	T	T	T	C	C	C	T	N	Y	N	C	T	T	N	T	C	C	T	T	T	T	T
5853	5853	M5853	SCSC-2_GI_5_1=S	G/T	3	CSC-2_GI_5_1=SCAFFOLD_408=GI_5_2=SCAFFOLD_435=GI_5_3=SCAFFOLD_2402=SCAFFOLD_2024=GI_5_4	3220667	+	N	T	N	G	G	G	T	N	G	T	T	N	T	N	N	G	G	N	T	G	G	G	T	T	N	G	N	K	N	T	G	G	N	G	T	T	G	G	G	G	G
5854	5854	M5854	SCSC-2_GI_5_1=S	T/C	3	CSC-2_GI_5_1=SCAFFOLD_408=GI_5_2=SCAFFOLD_435=GI_5_3=SCAFFOLD_2402=SCAFFOLD_2024=GI_5_4	3220674	+	N	C	N	T	T	T	C	N	T	C	C	N	C	N	N	T	T	N	C	T	T	T	C	C	N	T	N	Y	N	C	T	T	N	T	C	C	T	T	T	T	T
5855	5855	M5855	SCSC-2_GI_5_1=S	A/T	3	CSC-2_GI_5_1=SCAFFOLD_408=GI_5_2=SCAFFOLD_435=GI_5_3=SCAFFOLD_2402=SCAFFOLD_2024=GI_5_4	3220691	+	N	T	N	A	A	A	T	N	A	T	T	N	T	N	N	A	A	N	T	A	A	A	T	T	N	A	N	W	N	T	A	A	N	A	T	T	A	A	A	A	A
5856	5856	M5856	SCSC-2_GI_5_1=S	C/A	3	CSC-2_GI_5_1=SCAFFOLD_408=GI_5_2=SCAFFOLD_435=GI_5_3=SCAFFOLD_2402=SCAFFOLD_2024=GI_5_4	3220722	+	N	A	N	C	C	C	A	N	C	A	A	N	A	N	N	C	C	N	A	C	C	C	A	A	N	C	N	M	N	A	C	C	N	C	A	A	C	C	C	C	C
5857	5857	M5857	SCSC-2_GI_5_1=S	C/G	3	CSC-2_GI_5_1=SCAFFOLD_408=GI_5_2=SCAFFOLD_435=GI_5_3=SCAFFOLD_2402=SCAFFOLD_2024=GI_5_4	3220733	+	N	G	N	C	C	C	G	N	C	G	G	N	G	N	N	C	C	N	G	C	C	C	G	G	N	C	N	S	N	G	C	C	N	C	G	G	C	C	C	C	C
5858	5858	M5858	SCSC-2_GI_5_1=S	C/T	3	CSC-2_GI_5_1=SCAFFOLD_408=GI_5_2=SCAFFOLD_435=GI_5_3=SCAFFOLD_2402=SCAFFOLD_2024=GI_5_4	3246397	+	N	T	N	C	C	C	T	N	C	T	T	N	T	N	N	C	C	N	T	C	C	C	T	T	N	C	N	Y	N	T	C	C	N	C	T	T	C	C	C	C	C
5859	5859	M5859	SCSC-2_GI_5_1=S	C/T	3	CSC-2_GI_5_1=SCAFFOLD_408=GI_5_2=SCAFFOLD_435=GI_5_3=SCAFFOLD_2402=SCAFFOLD_2024=GI_5_4	3246426	+	N	T	N	C	C	C	T	N	C	T	T	N	T	N	N	C	C	N	T	C	C	C	T	T	N	C	N	Y	N	T	C	C	N	C	T	T	C	C	C	C	C
5860	5860	M5860	SCSC-2_GI_5_1=S	A/T	3	CSC-2_GI_5_1=SCAFFOLD_408=GI_5_2=SCAFFOLD_435=GI_5_3=SCAFFOLD_2402=SCAFFOLD_2024=GI_5_4	3249828	+	N	T	N	A	A	A	T	N	A	T	T	N	T	N	N	A	N	N	T	A	A	A	T	T	T	A	N	W	N	T	A	A	N	A	T	T	A	A	A	A	A
5861	5861	M5861	SCSC-2_GI_5_1=S	G/A	3	CSC-2_GI_5_1=SCAFFOLD_408=GI_5_2=SCAFFOLD_435=GI_5_3=SCAFFOLD_2402=SCAFFOLD_2024=GI_5_4	3298361	+	N	A	N	G	G	G	A	N	G	A	A	N	A	N	N	G	G	N	A	G	G	G	A	A	A	G	N	R	N	A	G	G	N	G	A	A	G	G	G	G	G
5862	5862	M5862	SCSC-2_GI_5_1=S	G/A	3	CSC-2_GI_5_1=SCAFFOLD_408=GI_5_2=SCAFFOLD_435=GI_5_3=SCAFFOLD_2402=SCAFFOLD_2024=GI_5_4	3301783	+	N	A	N	G	G	G	A	N	G	A	A	N	A	N	N	G	N	N	A	G	G	G	A	A	N	G	N	R	N	A	G	G	N	N	A	A	G	G	G	G	G
5863	5863	M5863	SCSC-2_GI_5_1=S	A/T	3	CSC-2_GI_5_1=SCAFFOLD_408=GI_5_2=SCAFFOLD_435=GI_5_3=SCAFFOLD_2402=SCAFFOLD_2024=GI_5_4	3301810	+	N	T	N	A	A	A	T	N	A	T	T	N	T	N	N	A	N	N	T	A	A	A	T	T	N	A	N	W	N	T	A	A	N	N	T	T	A	A	A	A	A
5864	5864	M5864	SCSC-2_GI_5_1=S	A/G	3	CSC-2_GI_5_1=SCAFFOLD_408=GI_5_2=SCAFFOLD_435=GI_5_3=SCAFFOLD_2402=SCAFFOLD_2024=GI_5_4	3422676	+	N	G	N	A	A	A	G	N	A	G	G	N	G	N	N	A	R	N	G	A	A	A	G	G	N	A	N	R	N	G	A	A	N	A	G	G	A	A	A	A	A
5865	5865	M5865	SCSC-2_GI_5_1=S	A/T	3	CSC-2_GI_5_1=SCAFFOLD_408=GI_5_2=SCAFFOLD_435=GI_5_3=SCAFFOLD_2402=SCAFFOLD_2024=GI_5_4	3460765	+	N	T	N	A	A	A	T	N	A	T	T	N	T	N	N	A	T	N	T	A	A	A	T	T	T	A	N	T	N	T	A	A	N	A	T	T	A	A	A	A	A
5866	5866	M5866	SCSC-2_GI_5_1=S	A/T	3	CSC-2_GI_5_1=SCAFFOLD_408=GI_5_2=SCAFFOLD_435=GI_5_3=SCAFFOLD_2402=SCAFFOLD_2024=GI_5_4	3466064	+	N	T	N	A	A	A	T	N	A	T	T	N	T	N	N	A	T	N	T	A	A	A	T	T	T	A	N	W	N	T	A	A	N	A	T	T	A	A	A	A	A
5867	5867	M5867	SCSC-2_GI_5_1=S	G/C	3	CSC-2_GI_5_1=SCAFFOLD_408=GI_5_2=SCAFFOLD_435=GI_5_3=SCAFFOLD_2402=SCAFFOLD_2024=GI_5_4	3467565	+	G	C	N	G	G	G	C	N	G	C	C	N	C	N	N	G	S	N	C	G	G	G	C	C	C	G	N	S	N	C	G	G	N	G	C	C	G	G	G	G	G
5868	5868	M5868	SCSC-2_GI_5_1=S	C/G	3	CSC-2_GI_5_1=SCAFFOLD_408=GI_5_2=SCAFFOLD_435=GI_5_3=SCAFFOLD_2402=SCAFFOLD_2024=GI_5_4	3467839	+	N	G	N	C	C	C	G	N	C	G	G	N	G	N	N	C	S	N	G	C	C	C	G	G	G	C	N	S	N	G	C	C	N	C	G	G	C	C	C	C	C
5869	5869	M5869	SCSC-2_GI_5_1=S	A/G	3	CSC-2_GI_5_1=SCAFFOLD_408=GI_5_2=SCAFFOLD_435=GI_5_3=SCAFFOLD_2402=SCAFFOLD_2024=GI_5_4	3467850	+	N	G	N	A	A	A	G	N	A	G	G	N	G	N	N	A	R	N	G	A	A	A	G	G	G	A	N	R	N	G	A	A	N	A	G	G	A	A	A	A	A
5870	5870	M5870	SCSC-2_GI_5_1=S	A/G	3	CSC-2_GI_5_1=SCAFFOLD_408=GI_5_2=SCAFFOLD_435=GI_5_3=SCAFFOLD_2402=SCAFFOLD_2024=GI_5_4	3620449	+	A	G	N	A	A	A	G	N	A	G	G	N	G	N	N	A	R	N	G	A	A	A	G	G	N	A	N	R	N	G	A	A	N	A	G	G	G	A	A	A	A
5871	5871	M5871	SCSC-2_GI_5_1=S	G/A	3	CSC-2_GI_5_1=SCAFFOLD_408=GI_5_2=SCAFFOLD_435=GI_5_3=SCAFFOLD_2402=SCAFFOLD_2024=GI_5_4	3622501	+	N	A	N	G	G	G	A	N	G	A	A	N	A	N	N	G	A	N	A	G	G	G	A	A	N	G	N	R	N	A	G	G	N	G	A	A	A	G	G	G	G
5872	5872	M5872	SCSC-2_GI_5_1=S	G/A	3	CSC-2_GI_5_1=SCAFFOLD_408=GI_5_2=SCAFFOLD_435=GI_5_3=SCAFFOLD_2402=SCAFFOLD_2024=GI_5_4	3622548	+	N	A	N	G	G	G	A	N	G	A	A	N	A	N	N	G	R	N	A	G	G	G	A	A	A	G	N	R	N	A	G	G	N	G	A	A	A	G	G	G	G
5873	5873	M5873	SCSC-2_GI_5_1=S	A/G	3	CSC-2_GI_5_1=SCAFFOLD_408=GI_5_2=SCAFFOLD_435=GI_5_3=SCAFFOLD_2402=SCAFFOLD_2024=GI_5_4	3624410	+	N	G	N	A	A	A	G	N	A	G	G	N	G	N	N	A	A	N	G	A	A	A	G	G	G	A	N	R	N	G	A	A	N	A	G	G	G	A	A	A	A
5874	5874	M5874	SCSC-2_GI_5_1=S	T/C	3	CSC-2_GI_5_1=SCAFFOLD_408=GI_5_2=SCAFFOLD_435=GI_5_3=SCAFFOLD_2402=SCAFFOLD_2024=GI_5_4	3624437	+	N	C	N	T	T	T	C	N	T	C	C	N	C	N	N	T	T	N	C	T	T	T	C	C	C	T	N	Y	N	C	T	T	N	T	C	C	C	T	T	T	T
5875	5875	M5875	SCSC-2_GI_5_1=S	T/C	3	CSC-2_GI_5_1=SCAFFOLD_408=GI_5_2=SCAFFOLD_435=GI_5_3=SCAFFOLD_2402=SCAFFOLD_2024=GI_5_4	3624449	+	N	C	N	T	T	T	C	N	T	C	C	N	C	N	N	T	T	N	C	T	T	T	C	C	C	T	N	Y	N	C	T	T	N	T	C	C	C	T	T	T	T
5876	5876	M5876	SCSC-2_GI_5_1=S	G/A	3	CSC-2_GI_5_1=SCAFFOLD_408=GI_5_2=SCAFFOLD_435=GI_5_3=SCAFFOLD_2402=SCAFFOLD_2024=GI_5_4	3624458	+	N	A	N	G	G	G	A	N	G	A	A	N	A	N	N	G	G	N	A	G	G	G	A	A	A	G	N	R	N	A	G	G	N	G	A	A	A	G	G	G	G
5877	5877	M5877	SCSC-2_GI_5_1=S	A/C	3	CSC-2_GI_5_1=SCAFFOLD_408=GI_5_2=SCAFFOLD_435=GI_5_3=SCAFFOLD_2402=SCAFFOLD_2024=GI_5_4	3682553	+	N	C	N	A	A	A	C	N	A	C	C	N	C	N	N	A	M	N	C	A	A	A	C	C	C	C	N	C	N	C	A	A	N	A	C	A	C	A	A	A	A
5878	5878	M5878	SCSC-2_GI_5_1=S	T/C	3	CSC-2_GI_5_1=SCAFFOLD_408=GI_5_2=SCAFFOLD_435=GI_5_3=SCAFFOLD_2402=SCAFFOLD_2024=GI_5_4	3682580	+	N	C	N	T	T	T	C	N	T	C	C	N	C	N	N	T	Y	N	C	T	T	T	C	C	C	C	N	C	N	C	T	T	N	T	C	T	C	T	T	T	T
5879	5879	M5879	SCSC-2_GI_5_1=S	A/T	3	CSC-2_GI_5_1=SCAFFOLD_408=GI_5_2=SCAFFOLD_435=GI_5_3=SCAFFOLD_2402=SCAFFOLD_2024=GI_5_4	3706454	+	A	T	N	A	A	A	T	N	A	T	T	N	T	N	N	A	W	N	T	A	A	A	T	T	T	T	N	W	N	T	A	A	N	A	T	A	T	A	A	A	A
5880	5880	M5880	SCSC-2_GI_5_1=S	T/C	3	CSC-2_GI_5_1=SCAFFOLD_408=GI_5_2=SCAFFOLD_435=GI_5_3=SCAFFOLD_2402=SCAFFOLD_2024=GI_5_4	3760458	+	N	C	N	T	T	T	C	N	T	C	C	N	C	N	N	T	Y	N	C	T	T	T	C	T	C	C	N	Y	N	C	T	T	N	T	C	T	C	T	T	T	T
5881	5881	M5881	SCSC-2_GI_5_1=S	A/C	3	CSC-2_GI_5_1=SCAFFOLD_408=GI_5_2=SCAFFOLD_435=GI_5_3=SCAFFOLD_2402=SCAFFOLD_2024=GI_5_4	3818035	+	N	C	N	A	A	A	C	N	A	C	C	N	C	N	N	A	C	N	C	A	A	A	C	A	N	C	N	M	N	C	A	A	N	A	C	A	C	A	A	A	A
5882	5882	M5882	SCSC-2_GI_5_1=S	A/C	3	CSC-2_GI_5_1=SCAFFOLD_408=GI_5_2=SCAFFOLD_435=GI_5_3=SCAFFOLD_2402=SCAFFOLD_2024=GI_5_4	3861497	+	N	C	N	A	A	A	C	N	A	C	C	N	C	N	N	A	M	N	C	A	A	A	C	A	C	C	N	M	N	C	A	A	N	A	C	A	C	A	A	A	A
5883	5883	M5883	SCSC-2_GI_5_1=S	T/G	3	CSC-2_GI_5_1=SCAFFOLD_408=GI_5_2=SCAFFOLD_435=GI_5_3=SCAFFOLD_2402=SCAFFOLD_2024=GI_5_4	3861509	+	N	G	N	T	T	T	G	N	T	G	G	N	G	N	N	T	K	N	G	T	T	T	G	T	G	G	N	K	N	G	T	T	N	T	G	T	G	T	T	T	T
5884	5884	M5884	SCSC-2_GI_5_1=S	A/C	3	CSC-2_GI_5_1=SCAFFOLD_408=GI_5_2=SCAFFOLD_435=GI_5_3=SCAFFOLD_2402=SCAFFOLD_2024=GI_5_4	3861536	+	N	C	N	A	A	A	C	N	A	C	C	N	C	N	N	A	M	N	C	A	A	A	C	A	C	C	N	M	N	C	A	A	N	A	C	A	C	A	A	A	A
5885	5885	M5885	SCSC-2_GI_5_1=S	G/A	3	CSC-2_GI_5_1=SCAFFOLD_408=GI_5_2=SCAFFOLD_435=GI_5_3=SCAFFOLD_2402=SCAFFOLD_2024=GI_5_4	3861590	+	N	A	N	G	G	G	A	N	G	A	A	N	A	N	N	G	R	N	A	G	G	G	A	G	N	A	N	R	N	A	G	G	N	G	A	G	A	G	G	G	G
5886	5886	M5886	SCSC-2_GI_5_1=S	T/C	3	CSC-2_GI_5_1=SCAFFOLD_408=GI_5_2=SCAFFOLD_435=GI_5_3=SCAFFOLD_2402=SCAFFOLD_2024=GI_5_4	3861605	+	N	C	N	T	T	T	C	N	T	C	C	N	C	N	N	T	Y	N	C	T	T	T	C	T	N	C	N	Y	N	C	T	T	N	T	C	T	C	T	T	T	T
5887	5887	M5887	SCSC-2_GI_5_1=S	T/G	3	CSC-2_GI_5_1=SCAFFOLD_408=GI_5_2=SCAFFOLD_435=GI_5_3=SCAFFOLD_2402=SCAFFOLD_2024=GI_5_4	3886631	+	N	T	N	T	T	T	G	N	T	G	G	N	G	N	N	T	K	N	G	T	T	T	G	T	N	G	N	K	N	G	T	T	N	T	G	T	G	T	T	T	T
5888	5888	M5888	SCSC-2_GI_5_1=S	G/C	3	CSC-2_GI_5_1=SCAFFOLD_408=GI_5_2=SCAFFOLD_435=GI_5_3=SCAFFOLD_2402=SCAFFOLD_2024=GI_5_4	3886704	+	N	G	N	G	G	G	C	N	G	C	C	N	C	N	N	G	S	N	C	G	G	G	C	G	C	C	N	S	N	C	G	G	N	G	C	G	C	G	G	G	G
5889	5889	M5889	SCSC-2_GI_5_1=S	A/T	3	CSC-2_GI_5_1=SCAFFOLD_408=GI_5_2=SCAFFOLD_435=GI_5_3=SCAFFOLD_2402=SCAFFOLD_2024=GI_5_4	3886712	+	N	A	N	A	A	A	T	N	A	T	T	N	T	N	N	A	W	N	T	A	A	A	T	A	T	T	N	W	N	T	A	A	N	A	T	A	T	A	A	A	A
5890	5890	M5890	SCSC-2_GI_5_1=S	A/G	3	CSC-2_GI_5_1=SCAFFOLD_408=GI_5_2=SCAFFOLD_435=GI_5_3=SCAFFOLD_2402=SCAFFOLD_2024=GI_5_4	3886734	+	N	A	N	A	A	A	G	N	A	G	G	N	G	N	N	A	R	N	G	A	A	A	G	A	G	G	N	R	N	G	A	A	N	A	G	A	G	A	A	A	A
5891	5891	M5891	SCSC-2_GI_5_1=S	C/T	3	CSC-2_GI_5_1=SCAFFOLD_408=GI_5_2=SCAFFOLD_435=GI_5_3=SCAFFOLD_2402=SCAFFOLD_2024=GI_5_4	3890207	+	N	C	N	C	C	C	T	N	C	T	T	N	T	N	N	C	C	N	T	C	C	C	T	C	T	T	N	T	N	T	C	C	N	C	T	C	T	C	C	C	C
5892	5892	M5892	SCSC-2_GI_5_1=S	A/T	3	CSC-2_GI_5_1=SCAFFOLD_408=GI_5_2=SCAFFOLD_435=GI_5_3=SCAFFOLD_2402=SCAFFOLD_2024=GI_5_4	3890302	+	N	A	N	A	A	A	T	N	A	T	T	N	T	N	N	A	A	N	T	A	A	A	T	A	N	T	N	W	N	T	A	A	N	A	T	A	T	A	A	A	A
5893	5893	M5893	SCSC-2_GI_5_1=S	T/C	3	CSC-2_GI_5_1=SCAFFOLD_408=GI_5_2=SCAFFOLD_435=GI_5_3=SCAFFOLD_2402=SCAFFOLD_2024=GI_5_4	3930390	+	N	T	N	T	T	T	C	N	T	C	C	N	C	N	N	T	T	N	C	T	T	T	C	T	N	C	N	Y	N	C	T	T	N	T	C	T	C	T	T	T	T
5894	5894	M5894	SCSC-2_GI_5_1=S	G/C	3	CSC-2_GI_5_1=SCAFFOLD_408=GI_5_2=SCAFFOLD_435=GI_5_3=SCAFFOLD_2402=SCAFFOLD_2024=GI_5_4	3930393	+	N	G	N	G	G	G	C	N	G	C	C	N	C	N	N	G	G	N	C	G	G	G	C	G	N	C	N	S	N	C	G	G	N	G	C	G	C	G	G	G	G
5895	5895	M5895	SCSC-2_GI_5_1=S	G/A	3	CSC-2_GI_5_1=SCAFFOLD_408=GI_5_2=SCAFFOLD_435=GI_5_3=SCAFFOLD_2402=SCAFFOLD_2024=GI_5_4	3930418	+	N	G	N	G	G	G	A	N	G	A	A	N	A	N	N	G	G	N	A	G	G	G	A	G	N	A	N	R	N	A	G	G	N	G	A	G	A	G	G	G	G
5896	5896	M5896	SCSC-2_GI_5_1=S	C/G	3	CSC-2_GI_5_1=SCAFFOLD_408=GI_5_2=SCAFFOLD_435=GI_5_3=SCAFFOLD_2402=SCAFFOLD_2024=GI_5_4	3930579	+	N	C	N	C	C	C	G	N	C	G	G	N	G	N	N	C	C	N	G	C	C	C	G	C	N	G	N	S	N	G	C	C	N	C	G	C	G	C	C	C	C
5897	5897	M5897	SCSC-2_GI_5_1=S	C/G	3	CSC-2_GI_5_1=SCAFFOLD_408=GI_5_2=SCAFFOLD_435=GI_5_3=SCAFFOLD_2402=SCAFFOLD_2024=GI_5_4	3930582	+	N	C	N	C	C	C	G	N	C	G	G	N	G	N	N	C	C	N	G	C	C	C	G	C	N	G	N	S	N	G	C	C	N	C	G	C	G	C	C	C	C
5899	5899	M5899	SCSC-2_GI_5_1=S	C/A	3	CSC-2_GI_5_1=SCAFFOLD_408=GI_5_2=SCAFFOLD_435=GI_5_3=SCAFFOLD_2402=SCAFFOLD_2024=GI_5_4	4087036	+	N	C	N	C	C	C	A	N	C	C	A	N	A	N	N	C	M	N	A	C	C	C	A	C	A	A	N	M	N	A	C	C	N	C	A	A	A	C	C	C	C
5900	5900	M5900	SCSC-2_GI_5_1=S	T/G	3	CSC-2_GI_5_1=SCAFFOLD_408=GI_5_2=SCAFFOLD_435=GI_5_3=SCAFFOLD_2402=SCAFFOLD_2024=GI_5_4	4087368	+	N	T	N	T	T	T	G	N	T	T	G	N	G	N	N	T	K	N	G	T	T	T	G	T	G	G	N	K	N	G	T	T	N	T	G	G	G	T	T	T	T
5901	5901	M5901	SCSC-2_GI_5_1=S	G/A	3	CSC-2_GI_5_1=SCAFFOLD_408=GI_5_2=SCAFFOLD_435=GI_5_3=SCAFFOLD_2402=SCAFFOLD_2024=GI_5_4	4124536	+	N	G	G	G	G	G	A	N	G	G	A	N	A	N	N	G	A	N	A	G	G	G	A	G	N	A	N	R	N	A	G	G	N	G	A	A	A	G	G	G	G
5902	5902	M5902	SCSC-2_GI_5_1=S	T/C	3	CSC-2_GI_5_1=SCAFFOLD_408=GI_5_2=SCAFFOLD_435=GI_5_3=SCAFFOLD_2402=SCAFFOLD_2024=GI_5_4	4146332	+	N	T	T	T	T	T	C	N	T	T	C	N	C	N	N	T	Y	N	C	T	T	T	C	T	C	C	N	Y	N	C	T	T	N	T	C	C	C	T	T	T	T
5903	5903	M5903	SCSC-2_GI_5_1=S	T/C	3	CSC-2_GI_5_1=SCAFFOLD_408=GI_5_2=SCAFFOLD_435=GI_5_3=SCAFFOLD_2402=SCAFFOLD_2024=GI_5_4	4199626	+	N	T	N	T	T	T	C	N	T	T	C	N	C	N	N	T	Y	N	C	T	T	T	C	T	C	C	N	Y	N	C	T	T	N	T	C	C	C	T	T	T	T
5904	5904	M5904	SCSC-2_GI_5_1=S	G/A	3	CSC-2_GI_5_1=SCAFFOLD_408=GI_5_2=SCAFFOLD_435=GI_5_3=SCAFFOLD_2402=SCAFFOLD_2024=GI_5_4	4200061	+	N	G	N	G	G	G	A	N	G	G	A	N	A	N	N	G	R	N	A	G	G	G	A	G	A	A	N	R	N	A	G	G	N	G	A	A	A	G	G	G	G
5905	5905	M5905	SCSC-2_GI_5_1=S	G/A	3	CSC-2_GI_5_1=SCAFFOLD_408=GI_5_2=SCAFFOLD_435=GI_5_3=SCAFFOLD_2402=SCAFFOLD_2024=GI_5_4	4200440	+	N	G	N	G	G	G	A	N	G	G	A	G	A	N	N	G	R	N	A	G	G	G	A	G	A	A	N	R	N	A	G	G	N	G	A	A	A	G	G	G	G
5906	5906	M5906	SCSC-2_GI_5_1=S	T/C	3	CSC-2_GI_5_1=SCAFFOLD_408=GI_5_2=SCAFFOLD_435=GI_5_3=SCAFFOLD_2402=SCAFFOLD_2024=GI_5_4	4200453	+	N	T	N	T	T	T	C	N	T	T	C	T	C	N	N	T	Y	N	C	T	T	T	C	T	C	C	N	Y	N	C	T	T	N	T	C	C	C	T	T	T	T
5907	5907	M5907	SCSC-2_GI_5_1=S	T/G	3	CSC-2_GI_5_1=SCAFFOLD_408=GI_5_2=SCAFFOLD_435=GI_5_3=SCAFFOLD_2402=SCAFFOLD_2024=GI_5_4	4299981	+	N	T	G	T	T	T	G	N	T	T	G	N	G	N	N	T	K	N	G	T	T	T	G	T	G	G	N	K	N	G	T	T	N	T	G	G	G	T	T	T	T
5908	5908	M5908	SCSC-2_GI_5_1=S	C/A	3	CSC-2_GI_5_1=SCAFFOLD_408=GI_5_2=SCAFFOLD_435=GI_5_3=SCAFFOLD_2402=SCAFFOLD_2024=GI_5_4	4299982	+	N	C	A	C	C	C	A	N	C	C	A	N	A	N	N	C	M	N	A	C	C	C	A	C	A	A	N	M	N	A	C	C	N	C	A	A	A	C	C	C	C
5909	5909	M5909	SCSC-2_GI_5_1=S	G/A	3	CSC-2_GI_5_1=SCAFFOLD_408=GI_5_2=SCAFFOLD_435=GI_5_3=SCAFFOLD_2402=SCAFFOLD_2024=GI_5_4	4367858	+	N	G	A	G	G	G	A	N	G	G	A	N	A	N	N	G	R	N	A	G	G	G	A	G	N	A	N	R	N	A	G	G	N	G	A	A	A	G	G	G	G
5910	5910	M5910	SCSC-2_GI_5_1=S	A/G	3	CSC-2_GI_5_1=SCAFFOLD_408=GI_5_2=SCAFFOLD_435=GI_5_3=SCAFFOLD_2402=SCAFFOLD_2024=GI_5_4	4386725	+	N	A	N	A	A	A	G	N	A	A	G	N	G	N	N	A	A	N	G	A	A	A	G	A	N	G	N	R	N	G	A	A	N	A	G	G	G	A	A	A	A
5911	5911	M5911	SCSC-2_GI_5_1=S	C/G	3	CSC-2_GI_5_1=SCAFFOLD_408=GI_5_2=SCAFFOLD_435=GI_5_3=SCAFFOLD_2402=SCAFFOLD_2024=GI_5_4	4386763	+	N	C	N	C	C	C	G	N	C	C	G	N	G	N	N	C	C	N	G	C	C	C	G	C	N	G	N	S	N	G	C	C	N	C	G	G	G	C	C	C	C
5912	5912	M5912	SCSC-2_GI_5_1=S	C/T	3	CSC-2_GI_5_1=SCAFFOLD_408=GI_5_2=SCAFFOLD_435=GI_5_3=SCAFFOLD_2402=SCAFFOLD_2024=GI_5_4	4432453	+	N	C	N	C	C	C	T	N	C	C	T	N	T	N	N	C	C	N	T	C	C	C	T	C	T	T	N	Y	N	T	C	C	N	C	T	T	T	C	C	C	C
5913	5913	M5913	SCSC-2_GI_5_1=S	T/A	3	CSC-2_GI_5_1=SCAFFOLD_408=GI_5_2=SCAFFOLD_435=GI_5_3=SCAFFOLD_2402=SCAFFOLD_2024=GI_5_4	4461983	+	N	T	N	T	T	T	A	N	T	T	A	N	A	N	N	T	T	N	A	T	T	T	A	T	N	A	N	W	N	A	T	T	N	T	A	T	A	T	T	T	T
5914	5914	M5914	SCSC-2_GI_5_1=S	A/T	3	CSC-2_GI_5_1=SCAFFOLD_408=GI_5_2=SCAFFOLD_435=GI_5_3=SCAFFOLD_2402=SCAFFOLD_2024=GI_5_4	4494963	+	N	A	N	A	A	A	T	N	A	A	T	N	T	N	N	A	A	N	T	A	A	A	T	A	T	T	N	W	N	T	A	A	N	A	T	A	T	W	A	A	A
5915	5915	M5915	SCSC-2_GI_5_1=S	A/T	3	CSC-2_GI_5_1=SCAFFOLD_408=GI_5_2=SCAFFOLD_435=GI_5_3=SCAFFOLD_2402=SCAFFOLD_2024=GI_5_4	4494973	+	N	A	N	A	A	A	T	N	A	A	T	N	T	N	N	A	A	N	T	A	A	A	T	A	T	T	N	W	N	T	A	A	N	A	T	A	T	W	A	A	A
5917	5917	M5917	SCSC-2_GI_5_1=S	A/G	3	CSC-2_GI_5_1=SCAFFOLD_408=GI_5_2=SCAFFOLD_435=GI_5_3=SCAFFOLD_2402=SCAFFOLD_2024=GI_5_4	4522579	+	N	A	N	A	A	A	G	N	A	A	G	N	G	N	N	A	A	N	G	A	A	A	G	A	N	G	N	R	N	G	A	A	N	A	G	A	G	A	A	A	A
5918	5918	M5918	SCSC-2_GI_5_1=S	G/C	3	CSC-2_GI_5_1=SCAFFOLD_408=GI_5_2=SCAFFOLD_435=GI_5_3=SCAFFOLD_2402=SCAFFOLD_2024=GI_5_4	4588869	+	C	G	N	G	G	G	C	N	G	G	C	N	C	N	N	G	C	N	C	G	G	G	C	G	C	C	N	S	N	C	G	G	N	G	C	G	C	G	G	G	G
5919	5919	M5919	SCSC-2_GI_5_1=S	T/C	3	CSC-2_GI_5_1=SCAFFOLD_408=GI_5_2=SCAFFOLD_435=GI_5_3=SCAFFOLD_2402=SCAFFOLD_2024=GI_5_4	4678039	+	N	T	N	T	T	T	C	N	T	T	C	N	C	N	N	T	C	N	C	T	T	T	C	T	C	C	N	Y	N	C	T	T	N	T	C	T	C	T	T	T	T
5920	5920	M5920	SCSC-2_GI_5_1=S	C/T	3	CSC-2_GI_5_1=SCAFFOLD_408=GI_5_2=SCAFFOLD_435=GI_5_3=SCAFFOLD_2402=SCAFFOLD_2024=GI_5_4	4680641	+	N	C	N	C	C	C	T	N	C	C	T	N	T	N	N	C	T	N	T	C	C	C	T	C	N	T	N	Y	N	T	C	C	N	C	T	C	T	C	C	C	C
5922	5922	M5922	SCSC-2_GI_5_1=S	A/G	3	CSC-2_GI_5_1=SCAFFOLD_408=GI_5_2=SCAFFOLD_435=GI_5_3=SCAFFOLD_2402=SCAFFOLD_2024=GI_5_4	4709890	+	N	A	N	A	A	A	G	N	A	A	G	N	G	N	N	A	G	N	G	A	A	A	G	A	G	G	N	R	N	G	A	A	N	A	G	A	G	A	A	A	A
5923	5923	M5923	SCSC-2_GI_5_1=S	T/C	3	CSC-2_GI_5_1=SCAFFOLD_408=GI_5_2=SCAFFOLD_435=GI_5_3=SCAFFOLD_2402=SCAFFOLD_2024=GI_5_4	4710020	+	N	T	N	T	T	T	C	N	T	T	C	N	C	N	N	T	C	N	C	T	T	T	C	T	C	C	N	Y	N	C	T	T	N	T	C	T	C	T	T	T	T
5924	5924	M5924	SCSC-2_GI_5_1=S	A/G	3	CSC-2_GI_5_1=SCAFFOLD_408=GI_5_2=SCAFFOLD_435=GI_5_3=SCAFFOLD_2402=SCAFFOLD_2024=GI_5_4	4715968	+	N	A	N	A	A	A	G	N	A	A	G	N	G	N	N	A	G	N	G	A	A	A	G	A	G	G	N	R	N	G	A	A	N	A	G	A	G	A	N	A	A
5925	5925	M5925	SCSC-2_GI_5_1=S	C/A	3	CSC-2_GI_5_1=SCAFFOLD_408=GI_5_2=SCAFFOLD_435=GI_5_3=SCAFFOLD_2402=SCAFFOLD_2024=GI_5_4	4715971	+	N	C	N	C	C	C	A	N	C	C	A	N	A	N	N	C	A	N	A	C	C	C	A	C	A	A	N	M	N	A	C	C	N	C	A	C	A	C	N	C	C
5926	5926	M5926	SCSC-2_GI_5_1=S	G/A	3	CSC-2_GI_5_1=SCAFFOLD_408=GI_5_2=SCAFFOLD_435=GI_5_3=SCAFFOLD_2402=SCAFFOLD_2024=GI_5_4	4715972	+	N	G	N	G	G	G	A	N	G	G	A	N	A	N	N	G	A	N	A	G	G	G	A	G	A	A	N	R	N	A	G	G	N	G	A	G	A	G	N	G	G
5927	5927	M5927	SCSC-2_GI_5_1=S	G/A	3	CSC-2_GI_5_1=SCAFFOLD_408=GI_5_2=SCAFFOLD_435=GI_5_3=SCAFFOLD_2402=SCAFFOLD_2024=GI_5_4	4716354	+	N	G	N	G	G	G	A	N	G	G	A	N	A	N	N	G	A	N	R	G	G	G	A	G	A	A	N	R	N	A	G	G	N	G	A	G	A	G	G	G	G
5928	5928	M5928	SCSC-2_GI_5_1=S	A/G	3	CSC-2_GI_5_1=SCAFFOLD_408=GI_5_2=SCAFFOLD_435=GI_5_3=SCAFFOLD_2402=SCAFFOLD_2024=GI_5_4	4716356	+	N	A	N	A	A	A	G	N	A	A	G	N	G	N	N	A	G	N	R	A	A	A	G	A	G	G	N	R	N	G	A	A	N	A	G	A	G	A	A	A	A
5929	5929	M5929	SCSC-2_GI_5_1=S	T/A	3	CSC-2_GI_5_1=SCAFFOLD_408=GI_5_2=SCAFFOLD_435=GI_5_3=SCAFFOLD_2402=SCAFFOLD_2024=GI_5_4	4716403	+	N	T	N	T	T	T	A	N	T	T	A	N	A	N	N	T	A	N	W	T	T	T	A	T	A	A	N	W	N	A	T	T	N	T	A	T	A	T	T	T	T
5930	5930	M5930	SCSC-2_GI_5_1=S	A/T	3	CSC-2_GI_5_1=SCAFFOLD_408=GI_5_2=SCAFFOLD_435=GI_5_3=SCAFFOLD_2402=SCAFFOLD_2024=GI_5_4	4718063	+	N	A	N	A	A	A	T	N	A	A	T	N	T	N	N	A	T	N	T	A	A	A	T	A	N	T	N	W	N	T	A	A	N	A	T	A	T	A	A	A	A
5931	5931	M5931	SCSC-2_GI_5_1=S	A/T	3	CSC-2_GI_5_1=SCAFFOLD_408=GI_5_2=SCAFFOLD_435=GI_5_3=SCAFFOLD_2402=SCAFFOLD_2024=GI_5_4	4718070	+	N	A	N	A	A	A	T	N	A	A	T	N	T	N	N	A	T	N	T	A	A	A	T	A	N	T	N	W	N	T	A	A	N	A	T	A	T	A	A	A	A
5932	5932	M5932	SCSC-2_GI_5_1=S	A/C	3	CSC-2_GI_5_1=SCAFFOLD_408=GI_5_2=SCAFFOLD_435=GI_5_3=SCAFFOLD_2402=SCAFFOLD_2024=GI_5_4	4726765	+	N	A	N	A	A	A	C	N	A	A	C	N	C	N	N	A	C	N	C	A	A	A	C	A	C	C	N	M	N	C	A	A	N	A	C	A	C	A	A	A	A
5933	5933	M5933	SCSC-2_GI_5_1=S	T/G	3	CSC-2_GI_5_1=SCAFFOLD_408=GI_5_2=SCAFFOLD_435=GI_5_3=SCAFFOLD_2402=SCAFFOLD_2024=GI_5_4	4726770	+	N	T	N	T	T	T	G	N	T	T	G	N	G	N	N	T	G	N	G	T	T	T	G	T	G	G	N	K	N	G	T	T	N	T	G	T	G	T	T	T	T
5934	5934	M5934	SCSC-2_GI_5_1=S	A/C	3	CSC-2_GI_5_1=SCAFFOLD_408=GI_5_2=SCAFFOLD_435=GI_5_3=SCAFFOLD_2402=SCAFFOLD_2024=GI_5_4	4726793	+	N	A	N	A	A	A	C	N	A	A	C	N	C	N	N	A	C	N	C	A	A	A	C	A	C	C	N	M	N	C	A	A	N	A	C	A	C	A	A	A	A
5935	5935	M5935	SCSC-2_GI_5_1=S	T/C	3	CSC-2_GI_5_1=SCAFFOLD_408=GI_5_2=SCAFFOLD_435=GI_5_3=SCAFFOLD_2402=SCAFFOLD_2024=GI_5_4	4726829	+	N	T	N	T	T	T	C	N	T	T	C	N	C	N	N	T	C	N	C	T	T	T	C	T	C	C	N	Y	N	C	T	T	N	T	C	T	C	T	T	T	T
5936	5936	M5936	SCSC-2_GI_5_1=S	C/A	3	CSC-2_GI_5_1=SCAFFOLD_408=GI_5_2=SCAFFOLD_435=GI_5_3=SCAFFOLD_2402=SCAFFOLD_2024=GI_5_4	4726841	+	N	C	N	C	C	C	A	N	C	C	A	N	A	N	N	C	A	N	A	C	C	C	A	C	A	A	N	M	N	A	C	C	N	C	A	C	A	C	C	C	C
5939	5939	M5939	SCSC-2_GI_5_1=S	C/T	3	CSC-2_GI_5_1=SCAFFOLD_408=GI_5_2=SCAFFOLD_435=GI_5_3=SCAFFOLD_2402=SCAFFOLD_2024=GI_5_4	4748038	+	N	C	N	C	C	C	T	N	C	C	T	N	T	N	N	C	T	N	T	T	C	C	T	C	T	T	N	Y	N	T	C	C	N	C	T	C	T	C	C	C	C
5940	5940	M5940	SCSC-2_GI_5_1=S	G/A	3	CSC-2_GI_5_1=SCAFFOLD_408=GI_5_2=SCAFFOLD_435=GI_5_3=SCAFFOLD_2402=SCAFFOLD_2024=GI_5_4	4748054	+	N	G	N	G	G	G	A	N	G	G	A	N	A	N	N	G	A	N	A	A	G	G	A	G	A	A	N	R	N	A	G	G	N	G	A	G	A	G	G	G	G
5941	5941	M5941	SCSC-2_GI_5_1=S	A/G	3	CSC-2_GI_5_1=SCAFFOLD_408=GI_5_2=SCAFFOLD_435=GI_5_3=SCAFFOLD_2402=SCAFFOLD_2024=GI_5_4	4748890	+	N	A	N	A	A	A	G	N	A	A	G	N	G	N	N	A	G	N	G	G	A	A	G	A	N	G	N	R	N	G	A	A	N	A	G	A	G	A	A	A	A
5942	5942	M5942	SCSC-2_GI_5_1=S	G/C	3	CSC-2_GI_5_1=SCAFFOLD_408=GI_5_2=SCAFFOLD_435=GI_5_3=SCAFFOLD_2402=SCAFFOLD_2024=GI_5_4	4749346	+	C	G	N	G	G	G	C	N	G	G	C	N	C	N	N	G	C	N	C	C	G	G	C	G	N	C	N	S	N	C	G	G	N	G	C	G	C	G	G	G	G
5943	5943	M5943	SCSC-2_GI_5_1=S	T/C	3	CSC-2_GI_5_1=SCAFFOLD_408=GI_5_2=SCAFFOLD_435=GI_5_3=SCAFFOLD_2402=SCAFFOLD_2024=GI_5_4	4749373	+	C	T	N	T	T	T	C	N	T	T	C	N	C	N	N	T	C	N	C	C	T	T	C	T	N	C	N	Y	N	C	T	T	N	T	C	T	C	T	T	T	T
5944	5944	M5944	SCSC-2_GI_5_1=S	A/G	3	CSC-2_GI_5_1=SCAFFOLD_408=GI_5_2=SCAFFOLD_435=GI_5_3=SCAFFOLD_2402=SCAFFOLD_2024=GI_5_4	4794877	+	N	A	N	A	A	A	G	N	A	A	G	N	G	N	N	A	G	N	G	G	A	A	G	A	G	G	N	R	N	G	A	A	N	A	G	A	G	A	A	A	A
5945	5945	M5945	SCSC-2_GI_5_1=S	A/G	3	CSC-2_GI_5_1=SCAFFOLD_408=GI_5_2=SCAFFOLD_435=GI_5_3=SCAFFOLD_2402=SCAFFOLD_2024=GI_5_4	4794883	+	N	A	N	A	A	A	G	N	A	A	G	N	G	N	N	A	G	N	G	G	A	A	G	A	G	G	N	R	N	G	A	A	N	A	G	A	G	A	A	A	A
5946	5946	M5946	SCSC-2_GI_5_1=S	T/G	3	CSC-2_GI_5_1=SCAFFOLD_408=GI_5_2=SCAFFOLD_435=GI_5_3=SCAFFOLD_2402=SCAFFOLD_2024=GI_5_4	4794898	+	N	T	N	T	T	T	G	N	T	T	G	N	G	N	N	T	G	N	G	G	T	T	G	T	G	G	N	K	N	G	T	T	N	T	G	T	G	T	T	T	T
5947	5947	M5947	SCSC-2_GI_5_1=S	C/G	3	CSC-2_GI_5_1=SCAFFOLD_408=GI_5_2=SCAFFOLD_435=GI_5_3=SCAFFOLD_2402=SCAFFOLD_2024=GI_5_4	4800624	+	N	C	N	C	C	C	G	N	C	C	G	N	G	N	N	C	G	N	G	G	C	C	G	C	G	G	N	S	N	G	C	C	N	C	G	C	G	C	C	C	C
5948	5948	M5948	SCSC-2_GI_5_1=S	C/G	3	CSC-2_GI_5_1=SCAFFOLD_408=GI_5_2=SCAFFOLD_435=GI_5_3=SCAFFOLD_2402=SCAFFOLD_2024=GI_5_4	4800658	+	N	C	N	C	C	C	G	N	C	C	G	N	G	N	N	C	G	N	G	G	C	C	G	C	G	G	N	S	N	G	C	C	N	C	G	C	G	C	C	C	C
5949	5949	M5949	SCSC-2_GI_5_1=S	T/A	3	CSC-2_GI_5_1=SCAFFOLD_408=GI_5_2=SCAFFOLD_435=GI_5_3=SCAFFOLD_2402=SCAFFOLD_2024=GI_5_4	4800722	+	N	T	N	T	T	T	A	N	T	T	A	N	A	N	N	T	A	N	A	A	T	T	A	T	N	A	N	W	N	A	T	T	N	T	A	T	A	T	T	T	T
5950	5950	M5950	SCSC-2_GI_5_1=S	A/C	3	CSC-2_GI_5_1=SCAFFOLD_408=GI_5_2=SCAFFOLD_435=GI_5_3=SCAFFOLD_2402=SCAFFOLD_2024=GI_5_4	4807915	+	N	A	N	A	A	A	C	N	A	A	C	N	C	N	N	A	C	N	C	C	A	A	C	A	N	C	N	M	N	C	A	A	N	A	C	A	C	A	A	A	A
5951	5951	M5951	SCSC-2_GI_5_1=S	C/A	3	CSC-2_GI_5_1=SCAFFOLD_408=GI_5_2=SCAFFOLD_435=GI_5_3=SCAFFOLD_2402=SCAFFOLD_2024=GI_5_4	4807917	+	N	C	N	C	C	C	A	N	C	C	A	N	A	N	N	C	A	N	A	A	C	C	A	C	N	A	N	M	N	A	C	C	N	C	A	C	A	C	C	C	C
5953	5953	M5953	SCSC-2_GI_5_1=S	C/T	3	CSC-2_GI_5_1=SCAFFOLD_408=GI_5_2=SCAFFOLD_435=GI_5_3=SCAFFOLD_2402=SCAFFOLD_2024=GI_5_4	4807953	+	N	C	N	C	C	C	T	N	C	C	T	N	T	N	N	C	T	N	T	T	C	C	T	C	N	T	N	Y	N	T	C	C	N	C	T	C	T	C	C	C	C
5954	5954	M5954	SCSC-2_GI_5_1=S	G/A	3	CSC-2_GI_5_1=SCAFFOLD_408=GI_5_2=SCAFFOLD_435=GI_5_3=SCAFFOLD_2402=SCAFFOLD_2024=GI_5_4	4807975	+	N	G	N	G	G	G	A	N	G	G	A	N	A	N	N	G	A	N	A	A	G	G	A	G	N	A	N	R	N	A	G	G	N	G	A	G	A	G	G	G	G
5956	5956	M5956	SCSC-2_GI_5_1=S	T/C	3	CSC-2_GI_5_1=SCAFFOLD_408=GI_5_2=SCAFFOLD_435=GI_5_3=SCAFFOLD_2402=SCAFFOLD_2024=GI_5_4	4814196	+	N	T	N	T	T	T	C	N	T	T	C	N	C	N	N	T	C	N	C	C	T	T	C	T	N	C	N	Y	N	C	T	T	N	T	C	T	C	T	T	T	T
5957	5957	M5957	SCSC-2_GI_5_1=S	C/T	3	CSC-2_GI_5_1=SCAFFOLD_408=GI_5_2=SCAFFOLD_435=GI_5_3=SCAFFOLD_2402=SCAFFOLD_2024=GI_5_4	4814247	+	N	C	N	C	C	C	T	N	C	C	T	N	T	N	N	C	T	N	T	T	C	C	T	C	N	T	N	Y	N	T	C	C	N	C	T	C	T	C	C	C	C
5960	5960	M5960	SCSC-2_GI_5_1=S	T/A	3	CSC-2_GI_5_1=SCAFFOLD_408=GI_5_2=SCAFFOLD_435=GI_5_3=SCAFFOLD_2402=SCAFFOLD_2024=GI_5_4	4826023	+	N	T	N	T	T	T	A	N	T	T	A	N	A	N	N	T	A	N	A	A	T	T	A	T	N	A	N	W	N	A	T	T	N	T	A	T	A	T	T	T	T
5961	5961	M5961	SCSC-2_GI_5_1=S	G/C	3	CSC-2_GI_5_1=SCAFFOLD_408=GI_5_2=SCAFFOLD_435=GI_5_3=SCAFFOLD_2402=SCAFFOLD_2024=GI_5_4	4826037	+	N	G	N	G	G	G	C	N	G	G	C	N	C	N	N	G	C	N	C	C	G	G	C	G	N	C	N	S	N	C	G	G	N	G	C	G	C	G	G	G	G
5963	5963	M5963	SCSC-2_GI_5_1=S	A/G	3	CSC-2_GI_5_1=SCAFFOLD_408=GI_5_2=SCAFFOLD_435=GI_5_3=SCAFFOLD_2402=SCAFFOLD_2024=GI_5_4	4827889	+	N	A	N	A	A	A	G	N	A	A	G	N	G	N	N	A	G	N	G	G	A	A	G	A	N	G	N	R	N	G	A	A	N	A	G	A	G	A	A	A	A
5964	5964	M5964	SCSC-2_GI_5_1=S	T/C	3	CSC-2_GI_5_1=SCAFFOLD_408=GI_5_2=SCAFFOLD_435=GI_5_3=SCAFFOLD_2402=SCAFFOLD_2024=GI_5_4	4827891	+	N	T	N	T	T	T	C	N	T	T	C	N	C	N	N	T	C	N	C	C	T	T	C	T	N	C	N	Y	N	C	T	T	N	T	C	T	C	T	T	T	T
5965	5965	M5965	SCSC-2_GI_5_1=S	A/G	3	CSC-2_GI_5_1=SCAFFOLD_408=GI_5_2=SCAFFOLD_435=GI_5_3=SCAFFOLD_2402=SCAFFOLD_2024=GI_5_4	4827899	+	N	A	N	A	A	A	G	N	A	A	G	N	G	N	N	A	G	N	G	G	A	A	G	A	N	G	N	R	N	G	A	A	N	A	G	A	G	A	A	A	A
5966	5966	M5966	SCSC-2_GI_5_1=S	C/G	3	CSC-2_GI_5_1=SCAFFOLD_408=GI_5_2=SCAFFOLD_435=GI_5_3=SCAFFOLD_2402=SCAFFOLD_2024=GI_5_4	4827929	+	N	C	N	C	C	C	G	N	C	C	G	N	G	N	N	C	G	N	G	G	C	C	G	C	N	G	N	S	N	G	C	C	N	C	G	C	G	C	C	C	C
5967	5967	M5967	SCSC-2_GI_5_1=S	T/C	3	CSC-2_GI_5_1=SCAFFOLD_408=GI_5_2=SCAFFOLD_435=GI_5_3=SCAFFOLD_2402=SCAFFOLD_2024=GI_5_4	4844861	+	N	T	N	T	T	T	C	N	T	T	C	N	C	N	N	T	C	N	C	C	T	T	C	T	C	C	N	Y	N	C	T	T	N	T	C	T	C	T	T	T	T
5968	5968	M5968	SCSC-2_GI_5_1=S	C/T	3	CSC-2_GI_5_1=SCAFFOLD_408=GI_5_2=SCAFFOLD_435=GI_5_3=SCAFFOLD_2402=SCAFFOLD_2024=GI_5_4	4844897	+	N	C	N	C	C	C	T	N	C	C	T	N	T	N	N	C	T	N	T	T	C	C	T	C	T	T	N	Y	N	T	C	C	N	C	T	C	T	C	C	C	C
5969	5969	M5969	SCSC-2_GI_5_1=S	T/C	3	CSC-2_GI_5_1=SCAFFOLD_408=GI_5_2=SCAFFOLD_435=GI_5_3=SCAFFOLD_2402=SCAFFOLD_2024=GI_5_4	4855481	+	N	T	N	T	T	T	C	N	T	T	C	N	C	N	N	T	C	N	C	C	T	T	C	T	N	C	N	Y	N	C	T	T	N	T	C	T	C	T	T	T	T
5974	5974	M5974	SCSC-2_GI_5_1=S	C/T	3	CSC-2_GI_5_1=SCAFFOLD_408=GI_5_2=SCAFFOLD_435=GI_5_3=SCAFFOLD_2402=SCAFFOLD_2024=GI_5_4	4857337	+	T	C	N	C	C	C	T	N	C	C	T	N	T	N	N	C	T	N	T	T	C	C	T	C	T	T	N	Y	N	T	C	C	N	C	T	C	T	C	C	C	C
5975	5975	M5975	SCSC-2_GI_5_1=S	A/G	3	CSC-2_GI_5_1=SCAFFOLD_408=GI_5_2=SCAFFOLD_435=GI_5_3=SCAFFOLD_2402=SCAFFOLD_2024=GI_5_4	4857339	+	G	A	N	A	A	A	G	N	A	A	G	N	G	N	N	A	G	N	G	G	A	A	G	A	G	G	N	R	N	G	A	A	N	A	G	A	G	A	A	A	A
5976	5976	M5976	SCSC-2_GI_5_1=S	C/A	3	CSC-2_GI_5_1=SCAFFOLD_408=GI_5_2=SCAFFOLD_435=GI_5_3=SCAFFOLD_2402=SCAFFOLD_2024=GI_5_4	4857382	+	A	C	N	C	C	C	A	N	C	C	A	N	A	N	N	C	A	N	A	A	C	C	A	C	A	A	N	M	N	A	C	C	N	C	A	C	A	C	C	C	C
5977	5977	M5977	SCSC-2_GI_5_1=S	T/A	3	CSC-2_GI_5_1=SCAFFOLD_408=GI_5_2=SCAFFOLD_435=GI_5_3=SCAFFOLD_2402=SCAFFOLD_2024=GI_5_4	4857385	+	A	T	N	T	T	T	A	N	T	T	A	N	A	N	N	T	A	N	A	A	T	T	A	T	A	A	N	W	N	A	T	T	N	T	A	T	A	T	T	T	T
5982	5982	M5982	SCSC-2_GI_5_1=S	A/G	3	CSC-2_GI_5_1=SCAFFOLD_408=GI_5_2=SCAFFOLD_435=GI_5_3=SCAFFOLD_2402=SCAFFOLD_2024=GI_5_4	4872338	+	N	A	N	A	A	A	G	N	A	A	G	N	G	N	N	A	G	N	G	G	A	A	G	A	G	G	N	R	N	G	A	A	N	A	G	A	G	A	A	A	A
5983	5983	M5983	SCSC-2_GI_5_1=S	A/G	3	CSC-2_GI_5_1=SCAFFOLD_408=GI_5_2=SCAFFOLD_435=GI_5_3=SCAFFOLD_2402=SCAFFOLD_2024=GI_5_4	4872344	+	N	A	N	A	A	A	G	N	A	A	G	N	G	N	N	A	G	N	G	G	A	A	G	A	G	G	N	R	N	G	A	A	N	A	G	A	G	A	A	A	A
5984	5984	M5984	SCSC-2_GI_5_1=S	A/G	3	CSC-2_GI_5_1=SCAFFOLD_408=GI_5_2=SCAFFOLD_435=GI_5_3=SCAFFOLD_2402=SCAFFOLD_2024=GI_5_4	4872422	+	N	A	N	A	A	A	G	N	A	A	G	N	G	N	N	A	G	N	G	G	A	A	G	A	N	G	N	R	N	G	A	A	N	A	G	A	G	A	A	A	A
5985	5985	M5985	SCSC-2_GI_5_1=S	A/T	3	CSC-2_GI_5_1=SCAFFOLD_408=GI_5_2=SCAFFOLD_435=GI_5_3=SCAFFOLD_2402=SCAFFOLD_2024=GI_5_4	4873028	+	N	A	T	A	A	A	T	N	A	A	T	N	T	N	N	A	T	N	T	T	A	A	T	A	T	T	N	W	N	T	A	A	N	A	T	A	T	A	A	A	A
5986	5986	M5986	SCSC-2_GI_5_1=S	A/G	3	CSC-2_GI_5_1=SCAFFOLD_408=GI_5_2=SCAFFOLD_435=GI_5_3=SCAFFOLD_2402=SCAFFOLD_2024=GI_5_4	4873043	+	N	A	G	A	A	A	G	N	A	A	G	N	G	N	N	A	G	N	G	G	A	A	G	A	G	G	N	R	N	G	A	A	N	A	G	A	G	A	A	A	A
5987	5987	M5987	SCSC-2_GI_5_1=S	G/A	3	CSC-2_GI_5_1=SCAFFOLD_408=GI_5_2=SCAFFOLD_435=GI_5_3=SCAFFOLD_2402=SCAFFOLD_2024=GI_5_4	4873087	+	N	G	N	G	G	G	A	N	G	G	A	N	A	N	N	G	A	N	A	A	G	G	A	G	N	A	N	R	N	A	G	G	N	G	A	G	A	G	G	G	G
5989	5989	M5989	SCSC-2_GI_5_1=S	A/G	3	CSC-2_GI_5_1=SCAFFOLD_408=GI_5_2=SCAFFOLD_435=GI_5_3=SCAFFOLD_2402=SCAFFOLD_2024=GI_5_4	4893292	+	N	A	N	A	A	A	G	N	A	N	G	N	G	N	N	A	G	N	G	G	A	A	G	A	N	G	N	R	N	G	A	A	N	A	G	A	G	A	A	A	A
5990	5990	M5990	SCSC-2_GI_5_1=S	C/T	3	CSC-2_GI_5_1=SCAFFOLD_408=GI_5_2=SCAFFOLD_435=GI_5_3=SCAFFOLD_2402=SCAFFOLD_2024=GI_5_4	4893375	+	T	C	N	C	C	C	T	N	C	C	T	N	T	N	N	C	T	N	T	T	C	C	T	C	N	T	N	Y	N	T	C	C	N	C	T	C	T	C	C	C	C
5991	5991	M5991	SCSC-2_GI_5_1=S	G/T	3	CSC-2_GI_5_1=SCAFFOLD_408=GI_5_2=SCAFFOLD_435=GI_5_3=SCAFFOLD_2402=SCAFFOLD_2024=GI_5_4	4893377	+	T	G	N	G	G	G	T	N	G	G	T	N	T	N	N	G	T	N	T	T	G	G	T	G	N	T	N	K	N	T	G	G	N	G	T	G	T	G	G	G	G
5992	5992	M5992	SCSC-2_GI_5_1=S	G/A	3	CSC-2_GI_5_1=SCAFFOLD_408=GI_5_2=SCAFFOLD_435=GI_5_3=SCAFFOLD_2402=SCAFFOLD_2024=GI_5_4	4893378	+	A	G	N	G	G	G	A	N	G	G	A	N	A	N	N	G	A	N	A	A	G	G	A	G	N	A	N	R	N	A	G	G	N	G	A	G	A	G	G	G	G
5993	5993	M5993	SCSC-2_GI_5_1=S	G/T	3	CSC-2_GI_5_1=SCAFFOLD_408=GI_5_2=SCAFFOLD_435=GI_5_3=SCAFFOLD_2402=SCAFFOLD_2024=GI_5_4	4893380	+	T	G	N	G	G	G	T	N	G	G	T	N	T	N	N	G	T	N	T	T	G	G	T	G	N	T	N	K	N	T	G	G	N	G	T	G	T	G	G	G	G
5994	5994	M5994	SCSC-2_GI_5_1=S	G/T	3	CSC-2_GI_5_1=SCAFFOLD_408=GI_5_2=SCAFFOLD_435=GI_5_3=SCAFFOLD_2402=SCAFFOLD_2024=GI_5_4	4896994	+	N	G	N	G	G	G	T	N	G	G	T	N	T	N	N	G	T	N	T	T	G	G	T	G	T	T	N	K	N	T	G	G	N	G	T	G	T	G	G	G	G
5995	5995	M5995	SCSC-2_GI_5_1=S	G/C	3	CSC-2_GI_5_1=SCAFFOLD_408=GI_5_2=SCAFFOLD_435=GI_5_3=SCAFFOLD_2402=SCAFFOLD_2024=GI_5_4	4908845	+	N	G	N	G	G	G	C	N	G	G	C	N	C	N	N	G	C	N	C	C	G	G	C	G	N	C	N	S	N	C	G	G	N	G	C	G	C	G	G	G	G
5996	5996	M5996	SCSC-2_GI_5_1=S	A/G	3	CSC-2_GI_5_1=SCAFFOLD_408=GI_5_2=SCAFFOLD_435=GI_5_3=SCAFFOLD_2402=SCAFFOLD_2024=GI_5_4	4909017	+	G	A	N	A	A	A	G	N	A	A	G	N	G	N	N	A	G	N	G	G	A	A	G	A	G	G	N	R	N	G	A	A	N	A	G	A	G	A	A	A	A
5997	5997	M5997	SCSC-2_GI_5_1=S	C/T	3	CSC-2_GI_5_1=SCAFFOLD_408=GI_5_2=SCAFFOLD_435=GI_5_3=SCAFFOLD_2402=SCAFFOLD_2024=GI_5_4	4909023	+	T	C	N	C	C	C	T	N	C	C	T	N	T	N	N	C	T	N	T	T	C	C	T	C	T	T	N	Y	N	T	C	C	N	C	T	C	T	C	C	C	C
5998	5998	M5998	SCSC-2_GI_5_1=S	A/C	3	CSC-2_GI_5_1=SCAFFOLD_408=GI_5_2=SCAFFOLD_435=GI_5_3=SCAFFOLD_2402=SCAFFOLD_2024=GI_5_4	4909035	+	C	A	N	A	A	A	C	N	A	A	C	N	C	N	N	A	C	N	C	C	A	A	C	A	C	C	N	M	N	C	A	A	N	A	C	A	C	A	A	A	A
5999	5999	M5999	SCSC-2_GI_5_1=S	T/A	3	CSC-2_GI_5_1=SCAFFOLD_408=GI_5_2=SCAFFOLD_435=GI_5_3=SCAFFOLD_2402=SCAFFOLD_2024=GI_5_4	4909070	+	A	T	N	T	T	T	A	N	T	T	A	N	A	N	N	T	A	N	A	A	T	T	A	T	A	A	N	W	N	A	T	T	N	T	A	T	A	T	T	T	T
6000	6000	M6000	SCSC-2_GI_5_1=S	C/T	3	CSC-2_GI_5_1=SCAFFOLD_408=GI_5_2=SCAFFOLD_435=GI_5_3=SCAFFOLD_2402=SCAFFOLD_2024=GI_5_4	4912234	+	N	C	N	C	C	C	T	N	C	C	T	N	T	N	N	C	T	N	T	T	C	C	T	C	N	T	N	Y	N	T	C	C	N	C	T	C	T	C	C	C	C
6001	6001	M6001	SCSC-2_GI_5_1=S	T/A	3	CSC-2_GI_5_1=SCAFFOLD_408=GI_5_2=SCAFFOLD_435=GI_5_3=SCAFFOLD_2402=SCAFFOLD_2024=GI_5_4	4912276	+	A	T	N	T	T	T	A	N	T	T	A	N	A	N	N	T	A	N	A	A	T	T	A	T	A	A	N	W	N	A	T	T	N	T	A	T	A	T	T	T	T
6002	6002	M6002	SCSC-2_GI_5_1=S	C/G	3	CSC-2_GI_5_1=SCAFFOLD_408=GI_5_2=SCAFFOLD_435=GI_5_3=SCAFFOLD_2402=SCAFFOLD_2024=GI_5_4	4912290	+	G	C	N	C	C	C	G	N	C	C	G	N	G	N	N	C	G	N	G	G	C	C	G	C	G	G	N	S	N	G	C	C	N	C	G	C	G	C	C	C	C
6003	6003	M6003	SCSC-2_GI_5_1=S	A/G	3	CSC-2_GI_5_1=SCAFFOLD_408=GI_5_2=SCAFFOLD_435=GI_5_3=SCAFFOLD_2402=SCAFFOLD_2024=GI_5_4	4912302	+	G	A	N	A	A	A	G	N	A	A	G	N	G	N	N	A	G	N	G	G	A	A	G	A	G	G	N	R	N	G	A	A	N	A	G	A	G	A	A	A	A
6004	6004	M6004	SCSC-2_GI_5_1=S	T/C	3	CSC-2_GI_5_1=SCAFFOLD_408=GI_5_2=SCAFFOLD_435=GI_5_3=SCAFFOLD_2402=SCAFFOLD_2024=GI_5_4	4924237	+	N	T	N	T	T	T	C	N	T	T	C	N	C	N	N	T	C	N	C	C	T	T	C	T	C	C	N	Y	N	C	T	T	N	T	C	T	C	T	T	T	T
6005	6005	M6005	SCSC-2_GI_5_1=S	T/G	3	CSC-2_GI_5_1=SCAFFOLD_408=GI_5_2=SCAFFOLD_435=GI_5_3=SCAFFOLD_2402=SCAFFOLD_2024=GI_5_4	4924246	+	N	T	N	T	T	T	G	N	T	T	G	N	G	N	N	T	G	N	G	G	T	T	G	T	G	G	N	K	N	G	T	T	N	T	G	T	G	T	T	T	T
6006	6006	M6006	SCSC-2_GI_5_1=S	G/A	3	CSC-2_GI_5_1=SCAFFOLD_408=GI_5_2=SCAFFOLD_435=GI_5_3=SCAFFOLD_2402=SCAFFOLD_2024=GI_5_4	4924386	+	N	G	N	G	G	G	A	N	G	G	A	N	A	N	N	G	A	N	A	A	G	G	A	G	N	A	N	R	N	A	G	G	N	G	A	G	A	G	G	G	G
6007	6007	M6007	SCSC-2_GI_5_1=S	C/G	3	CSC-2_GI_5_1=SCAFFOLD_408=GI_5_2=SCAFFOLD_435=GI_5_3=SCAFFOLD_2402=SCAFFOLD_2024=GI_5_4	4924407	+	N	C	N	C	C	C	G	N	C	C	G	N	G	N	N	C	G	N	G	G	C	C	G	C	N	G	N	S	N	G	C	C	N	C	G	C	G	C	C	C	C
6008	6008	M6008	SCSC-2_GI_5_1=S	C/T	3	CSC-2_GI_5_1=SCAFFOLD_408=GI_5_2=SCAFFOLD_435=GI_5_3=SCAFFOLD_2402=SCAFFOLD_2024=GI_5_4	4928228	+	N	C	N	C	C	C	T	N	C	C	T	N	T	N	N	C	T	N	T	T	C	C	T	C	N	T	N	Y	N	T	C	C	N	C	T	C	T	C	C	C	C
6009	6009	M6009	SCSC-2_GI_5_1=S	G/T	3	CSC-2_GI_5_1=SCAFFOLD_408=GI_5_2=SCAFFOLD_435=GI_5_3=SCAFFOLD_2402=SCAFFOLD_2024=GI_5_4	4928347	+	N	G	N	G	G	G	T	N	G	G	T	N	T	N	N	G	T	N	T	T	G	G	T	G	N	T	N	G	N	T	G	G	N	G	T	G	T	G	G	G	G
6010	6010	M6010	SCSC-2_GI_5_1=S	C/A	3	CSC-2_GI_5_1=SCAFFOLD_408=GI_5_2=SCAFFOLD_435=GI_5_3=SCAFFOLD_2402=SCAFFOLD_2024=GI_5_4	4928348	+	N	C	N	C	C	C	A	N	C	C	A	N	A	N	N	C	A	N	A	A	C	C	A	C	N	A	N	C	N	A	C	C	N	C	A	C	A	C	C	C	C
6011	6011	M6011	SCSC-2_GI_5_1=S	T/A	3	CSC-2_GI_5_1=SCAFFOLD_408=GI_5_2=SCAFFOLD_435=GI_5_3=SCAFFOLD_2402=SCAFFOLD_2024=GI_5_4	4928375	+	N	T	N	T	T	T	A	N	T	T	A	N	A	N	N	T	A	N	A	A	T	T	A	T	N	A	N	T	N	A	T	T	N	T	A	T	A	T	T	T	T
6014	6014	M6014	SCSC-2_GI_5_1=S	G/A	3	CSC-2_GI_5_1=SCAFFOLD_408=GI_5_2=SCAFFOLD_435=GI_5_3=SCAFFOLD_2402=SCAFFOLD_2024=GI_5_4	4971901	+	N	G	N	G	G	G	A	N	G	G	A	N	A	N	N	G	A	N	A	A	G	G	A	G	A	A	N	R	N	A	G	G	N	G	A	G	A	G	G	G	G
6015	6015	M6015	SCSC-2_GI_5_1=S	G/C	3	CSC-2_GI_5_1=SCAFFOLD_408=GI_5_2=SCAFFOLD_435=GI_5_3=SCAFFOLD_2402=SCAFFOLD_2024=GI_5_4	4971928	+	N	G	N	G	G	G	C	N	G	G	C	N	C	N	N	G	C	N	C	C	G	G	C	G	C	C	N	S	N	C	G	G	N	G	C	G	C	G	G	G	G
6016	6016	M6016	SCSC-2_GI_5_1=S	C/T	3	CSC-2_GI_5_1=SCAFFOLD_408=GI_5_2=SCAFFOLD_435=GI_5_3=SCAFFOLD_2402=SCAFFOLD_2024=GI_5_4	4975552	+	N	C	N	C	C	C	T	N	C	C	T	N	T	N	N	C	T	N	T	T	C	C	T	C	N	T	N	Y	N	T	C	C	N	C	T	C	Y	C	C	C	C
6017	6017	M6017	SCSC-2_GI_5_1=S	C/T	3	CSC-2_GI_5_1=SCAFFOLD_408=GI_5_2=SCAFFOLD_435=GI_5_3=SCAFFOLD_2402=SCAFFOLD_2024=GI_5_4	4977839	+	N	C	N	C	C	C	T	N	C	C	T	N	T	N	N	C	T	N	T	T	C	C	T	C	T	T	N	Y	N	T	C	C	N	C	T	C	T	C	C	C	C
6018	6018	M6018	SCSC-2_GI_5_1=S	G/C	3	CSC-2_GI_5_1=SCAFFOLD_408=GI_5_2=SCAFFOLD_435=GI_5_3=SCAFFOLD_2402=SCAFFOLD_2024=GI_5_4	4978696	+	N	G	N	G	G	G	C	N	G	G	C	N	C	N	N	G	C	N	C	C	G	G	C	G	C	C	N	S	N	C	G	G	N	G	C	G	C	G	G	G	G
6019	6019	M6019	SCSC-2_GI_5_1=S	G/C	3	CSC-2_GI_5_1=SCAFFOLD_408=GI_5_2=SCAFFOLD_435=GI_5_3=SCAFFOLD_2402=SCAFFOLD_2024=GI_5_4	4981005	+	C	G	N	G	G	G	C	N	G	G	C	N	C	N	N	G	C	N	C	C	G	G	C	G	C	C	N	S	N	C	G	G	N	G	C	G	C	G	G	G	G
6020	6020	M6020	SCSC-2_GI_5_1=S	C/T	3	CSC-2_GI_5_1=SCAFFOLD_408=GI_5_2=SCAFFOLD_435=GI_5_3=SCAFFOLD_2402=SCAFFOLD_2024=GI_5_4	4984956	+	N	C	N	C	C	C	T	N	C	C	T	N	T	N	N	C	T	N	T	T	C	C	T	C	N	T	N	Y	N	T	C	C	N	C	T	C	T	C	C	C	C
6021	6021	M6021	SCSC-2_GI_5_1=S	T/G	3	CSC-2_GI_5_1=SCAFFOLD_408=GI_5_2=SCAFFOLD_435=GI_5_3=SCAFFOLD_2402=SCAFFOLD_2024=GI_5_4	4985096	+	N	T	G	T	T	T	G	N	T	T	G	N	G	N	N	T	G	N	G	G	T	T	G	T	G	G	N	K	N	G	T	T	N	T	G	T	G	T	T	T	T
6022	6022	M6022	SCSC-2_GI_5_1=S	T/C	3	CSC-2_GI_5_1=SCAFFOLD_408=GI_5_2=SCAFFOLD_435=GI_5_3=SCAFFOLD_2402=SCAFFOLD_2024=GI_5_4	4985154	+	N	T	C	T	T	T	C	N	T	T	C	N	C	N	N	T	C	N	C	C	T	T	C	T	C	C	N	Y	N	C	T	T	N	T	C	T	C	T	T	T	T
6023	6023	M6023	SCSC-2_GI_5_1=S	T/G	3	CSC-2_GI_5_1=SCAFFOLD_408=GI_5_2=SCAFFOLD_435=GI_5_3=SCAFFOLD_2402=SCAFFOLD_2024=GI_5_4	4996058	+	N	T	N	T	T	T	G	N	T	T	G	N	G	N	N	T	G	N	G	G	T	T	G	T	N	G	N	K	N	G	T	T	G	T	G	T	G	T	T	T	T
6024	6024	M6024	SCSC-2_GI_5_1=S	C/A	3	CSC-2_GI_5_1=SCAFFOLD_408=GI_5_2=SCAFFOLD_435=GI_5_3=SCAFFOLD_2402=SCAFFOLD_2024=GI_5_4	4996073	+	N	C	N	C	C	C	A	N	C	C	A	N	A	N	N	C	A	N	A	A	C	C	A	C	N	A	N	M	N	A	C	C	A	C	A	C	A	C	C	C	C
6025	6025	M6025	SCSC-2_GI_5_1=S	A/G	3	CSC-2_GI_5_1=SCAFFOLD_408=GI_5_2=SCAFFOLD_435=GI_5_3=SCAFFOLD_2402=SCAFFOLD_2024=GI_5_4	5000598	+	N	A	N	A	A	A	G	N	A	A	G	N	G	N	N	A	G	N	G	G	A	A	G	A	N	G	N	R	N	G	A	A	N	A	G	A	G	A	A	A	A
6026	6026	M6026	SCSC-2_GI_5_1=S	T/C	3	CSC-2_GI_5_1=SCAFFOLD_408=GI_5_2=SCAFFOLD_435=GI_5_3=SCAFFOLD_2402=SCAFFOLD_2024=GI_5_4	5000922	+	N	T	N	T	T	T	C	N	T	T	C	N	C	N	N	T	C	N	C	C	T	T	C	T	N	C	N	Y	N	C	T	T	N	T	C	T	C	T	T	T	T
6027	6027	M6027	SCSC-2_GI_5_1=S	T/G	3	CSC-2_GI_5_1=SCAFFOLD_408=GI_5_2=SCAFFOLD_435=GI_5_3=SCAFFOLD_2402=SCAFFOLD_2024=GI_5_4	5000937	+	N	T	N	T	T	T	G	N	T	T	G	N	G	N	N	T	G	N	G	G	T	T	G	T	N	G	N	K	N	G	T	T	N	T	G	T	G	T	T	T	T
6028	6028	M6028	SCSC-2_GI_5_1=S	A/G	3	CSC-2_GI_5_1=SCAFFOLD_408=GI_5_2=SCAFFOLD_435=GI_5_3=SCAFFOLD_2402=SCAFFOLD_2024=GI_5_4	5000956	+	N	A	N	A	A	A	G	N	A	A	G	N	G	N	N	A	G	N	G	G	A	A	G	A	N	G	N	R	N	G	A	A	N	A	G	A	G	A	A	A	A
6029	6029	M6029	SCSC-2_GI_5_1=S	G/A	3	CSC-2_GI_5_1=SCAFFOLD_408=GI_5_2=SCAFFOLD_435=GI_5_3=SCAFFOLD_2402=SCAFFOLD_2024=GI_5_4	5029393	+	N	G	N	G	G	G	A	N	G	G	A	N	A	N	N	G	A	N	A	A	G	G	A	G	A	A	N	R	N	A	G	G	N	G	A	G	A	G	G	G	G
6030	6030	M6030	SCSC-2_GI_5_1=S	A/G	3	CSC-2_GI_5_1=SCAFFOLD_408=GI_5_2=SCAFFOLD_435=GI_5_3=SCAFFOLD_2402=SCAFFOLD_2024=GI_5_4	5029406	+	N	A	N	A	A	A	G	N	A	A	G	N	G	N	N	A	G	N	G	G	A	A	G	A	G	G	N	R	N	G	A	A	N	A	G	A	G	A	A	A	A
6035	6035	M6035	SCSC-2_GI_5_1=S	G/C	3	CSC-2_GI_5_1=SCAFFOLD_408=GI_5_2=SCAFFOLD_435=GI_5_3=SCAFFOLD_2402=SCAFFOLD_2024=GI_5_4	5102707	+	N	G	N	G	G	G	C	N	G	G	C	N	C	N	N	G	C	N	C	C	G	G	C	G	N	C	N	S	N	C	G	G	N	G	C	G	C	G	G	G	G
6036	6036	M6036	SCSC-2_GI_5_1=S	C/G	3	CSC-2_GI_5_1=SCAFFOLD_408=GI_5_2=SCAFFOLD_435=GI_5_3=SCAFFOLD_2402=SCAFFOLD_2024=GI_5_4	5102713	+	N	C	N	C	C	C	G	N	C	C	G	N	G	N	N	C	G	N	G	G	C	C	G	C	N	G	N	S	N	G	C	C	N	C	G	C	G	C	C	C	C
6037	6037	M6037	SCSC-2_GI_5_1=S	T/C	3	CSC-2_GI_5_1=SCAFFOLD_408=GI_5_2=SCAFFOLD_435=GI_5_3=SCAFFOLD_2402=SCAFFOLD_2024=GI_5_4	5158096	+	N	T	N	T	T	T	C	N	T	T	C	N	C	N	N	T	C	N	C	C	T	T	C	T	C	C	N	Y	N	C	T	T	N	T	C	T	C	T	T	T	T
6038	6038	M6038	SCSC-2_GI_5_1=S	A/G	3	CSC-2_GI_5_1=SCAFFOLD_408=GI_5_2=SCAFFOLD_435=GI_5_3=SCAFFOLD_2402=SCAFFOLD_2024=GI_5_4	5159713	+	G	A	N	A	A	A	G	N	A	A	G	N	G	N	N	A	G	N	G	G	A	A	G	A	G	G	N	R	N	G	A	A	N	A	G	A	G	A	A	A	A
6039	6039	M6039	SCSC-2_GI_5_1=S	T/C	3	CSC-2_GI_5_1=SCAFFOLD_408=GI_5_2=SCAFFOLD_435=GI_5_3=SCAFFOLD_2402=SCAFFOLD_2024=GI_5_4	5159719	+	C	T	N	T	T	T	C	N	T	T	C	N	C	N	N	T	C	N	C	C	T	T	C	T	C	C	N	Y	N	C	T	T	N	T	C	T	C	T	T	T	T
6040	6040	M6040	SCSC-2_GI_5_1=S	T/A	3	CSC-2_GI_5_1=SCAFFOLD_408=GI_5_2=SCAFFOLD_435=GI_5_3=SCAFFOLD_2402=SCAFFOLD_2024=GI_5_4	5159734	+	A	T	N	T	T	T	A	N	T	T	A	N	A	N	N	T	A	N	A	A	T	T	A	T	A	A	N	W	N	A	T	T	N	T	A	T	A	T	T	T	T
6042	6042	M6042	SCSC-2_GI_5_1=S	A/G	3	CSC-2_GI_5_1=SCAFFOLD_408=GI_5_2=SCAFFOLD_435=GI_5_3=SCAFFOLD_2402=SCAFFOLD_2024=GI_5_4	5162053	+	N	A	N	A	A	A	G	N	A	A	G	N	G	N	N	A	G	N	G	G	A	A	G	A	N	G	N	R	N	G	A	A	N	A	G	A	G	A	A	A	A
6043	6043	M6043	SCSC-2_GI_5_1=S	G/A	3	CSC-2_GI_5_1=SCAFFOLD_408=GI_5_2=SCAFFOLD_435=GI_5_3=SCAFFOLD_2402=SCAFFOLD_2024=GI_5_4	5162101	+	N	G	N	G	G	G	A	N	G	G	A	N	A	N	N	G	A	N	A	A	G	G	A	G	N	A	N	R	N	A	G	G	N	G	A	G	A	G	G	G	G
6044	6044	M6044	SCSC-2_GI_5_1=S	T/C	3	CSC-2_GI_5_1=SCAFFOLD_408=GI_5_2=SCAFFOLD_435=GI_5_3=SCAFFOLD_2402=SCAFFOLD_2024=GI_5_4	5162104	+	N	T	N	T	T	T	C	N	T	T	C	N	C	N	N	T	C	N	C	C	T	T	C	T	N	C	N	Y	N	C	T	T	N	T	C	T	C	T	T	T	T
6045	6045	M6045	SCSC-2_GI_5_1=S	A/G	3	CSC-2_GI_5_1=SCAFFOLD_408=GI_5_2=SCAFFOLD_435=GI_5_3=SCAFFOLD_2402=SCAFFOLD_2024=GI_5_4	5166550	+	N	A	N	A	A	A	G	N	A	A	G	N	G	N	N	A	G	N	G	G	A	A	G	A	N	G	N	A	N	G	A	A	N	A	G	A	G	A	A	A	A
6046	6046	M6046	SCSC-2_GI_5_1=S	T/C	3	CSC-2_GI_5_1=SCAFFOLD_408=GI_5_2=SCAFFOLD_435=GI_5_3=SCAFFOLD_2402=SCAFFOLD_2024=GI_5_4	5166559	+	N	T	N	T	T	T	C	N	T	T	C	N	C	N	N	T	C	N	C	C	T	T	C	T	N	C	N	T	N	C	T	T	N	T	C	T	C	T	T	T	T
6047	6047	M6047	SCSC-2_GI_5_1=S	T/A	3	CSC-2_GI_5_1=SCAFFOLD_408=GI_5_2=SCAFFOLD_435=GI_5_3=SCAFFOLD_2402=SCAFFOLD_2024=GI_5_4	5169421	+	A	T	N	T	T	T	A	N	T	T	A	N	A	N	N	T	A	N	A	A	T	T	A	T	N	A	N	W	N	A	T	T	N	T	A	T	A	T	T	T	T
6048	6048	M6048	SCSC-2_GI_5_1=S	C/T	3	CSC-2_GI_5_1=SCAFFOLD_408=GI_5_2=SCAFFOLD_435=GI_5_3=SCAFFOLD_2402=SCAFFOLD_2024=GI_5_4	5169424	+	T	C	N	C	C	C	T	N	C	C	T	N	T	N	N	C	T	N	T	T	C	C	T	C	N	T	N	Y	N	T	C	C	N	C	T	C	T	C	C	C	C
6049	6049	M6049	SCSC-2_GI_5_1=S	G/C	3	CSC-2_GI_5_1=SCAFFOLD_408=GI_5_2=SCAFFOLD_435=GI_5_3=SCAFFOLD_2402=SCAFFOLD_2024=GI_5_4	5169454	+	C	G	N	G	G	G	C	N	G	G	C	N	C	N	N	G	C	N	C	C	G	G	C	G	N	C	N	S	N	C	G	G	N	G	C	G	C	G	G	G	G
6050	6050	M6050	SCSC-2_GI_5_1=S	A/G	3	CSC-2_GI_5_1=SCAFFOLD_408=GI_5_2=SCAFFOLD_435=GI_5_3=SCAFFOLD_2402=SCAFFOLD_2024=GI_5_4	5169457	+	G	A	N	A	A	A	G	N	A	A	G	N	G	N	N	A	G	N	G	G	A	A	G	A	N	G	N	R	N	G	A	A	N	A	G	A	G	A	A	A	A
6051	6051	M6051	SCSC-2_GI_5_1=S	A/C	3	CSC-2_GI_5_1=SCAFFOLD_408=GI_5_2=SCAFFOLD_435=GI_5_3=SCAFFOLD_2402=SCAFFOLD_2024=GI_5_4	5174706	+	N	A	N	A	A	A	C	N	A	A	C	N	C	N	N	A	C	N	C	C	A	A	C	A	C	C	N	M	N	C	A	A	N	A	C	A	C	A	A	A	A
6052	6052	M6052	SCSC-2_GI_5_1=S	G/A	3	CSC-2_GI_5_1=SCAFFOLD_408=GI_5_2=SCAFFOLD_435=GI_5_3=SCAFFOLD_2402=SCAFFOLD_2024=GI_5_4	5175146	+	N	G	N	G	G	G	A	N	G	G	A	N	A	N	N	G	A	N	A	A	G	G	A	G	N	A	N	R	N	A	G	G	N	G	A	G	A	G	G	G	G
6053	6053	M6053	SCSC-2_GI_5_1=S	A/C	3	CSC-2_GI_5_1=SCAFFOLD_408=GI_5_2=SCAFFOLD_435=GI_5_3=SCAFFOLD_2402=SCAFFOLD_2024=GI_5_4	5175155	+	N	A	N	A	A	A	C	N	A	A	C	N	C	N	N	A	C	N	C	C	A	A	C	A	N	C	N	M	N	C	A	A	N	A	C	A	C	A	A	A	A
6054	6054	M6054	SCSC-2_GI_5_1=S	G/A	3	CSC-2_GI_5_1=SCAFFOLD_408=GI_5_2=SCAFFOLD_435=GI_5_3=SCAFFOLD_2402=SCAFFOLD_2024=GI_5_4	5177762	+	N	G	N	G	G	G	A	N	G	G	A	N	A	N	N	G	A	N	A	A	G	G	A	G	A	A	N	R	N	A	G	G	N	G	A	G	A	G	G	G	G
6055	6055	M6055	SCSC-2_GI_5_1=S	A/C	3	CSC-2_GI_5_1=SCAFFOLD_408=GI_5_2=SCAFFOLD_435=GI_5_3=SCAFFOLD_2402=SCAFFOLD_2024=GI_5_4	5192474	+	N	A	N	A	A	A	C	N	A	A	C	N	C	N	N	A	C	N	C	C	A	A	C	A	C	C	N	M	N	C	A	A	N	A	C	A	C	A	A	A	A
6056	6056	M6056	SCSC-2_GI_5_1=S	T/C	3	CSC-2_GI_5_1=SCAFFOLD_408=GI_5_2=SCAFFOLD_435=GI_5_3=SCAFFOLD_2402=SCAFFOLD_2024=GI_5_4	5192522	+	N	T	N	T	T	T	C	N	T	T	C	N	C	N	N	T	C	N	C	C	T	T	C	T	C	C	N	Y	N	C	T	T	N	T	C	T	C	T	T	T	T
6057	6057	M6057	SCSC-2_GI_5_1=S	A/G	3	CSC-2_GI_5_1=SCAFFOLD_408=GI_5_2=SCAFFOLD_435=GI_5_3=SCAFFOLD_2402=SCAFFOLD_2024=GI_5_4	5197512	+	G	A	N	A	A	A	G	N	A	A	G	N	G	N	N	A	G	N	G	G	A	A	G	A	G	G	N	R	N	G	A	A	N	A	G	A	G	A	A	A	A
6058	6058	M6058	SCSC-2_GI_5_1=S	C/A	3	CSC-2_GI_5_1=SCAFFOLD_408=GI_5_2=SCAFFOLD_435=GI_5_3=SCAFFOLD_2402=SCAFFOLD_2024=GI_5_4	5202052	+	N	C	N	C	C	C	A	N	C	C	A	N	A	N	N	C	A	N	A	A	C	C	A	C	A	A	N	M	N	A	C	C	N	C	A	C	A	C	C	C	C
6059	6059	M6059	SCSC-2_GI_5_1=S	C/T	3	CSC-2_GI_5_1=SCAFFOLD_408=GI_5_2=SCAFFOLD_435=GI_5_3=SCAFFOLD_2402=SCAFFOLD_2024=GI_5_4	5202084	+	N	C	N	C	C	C	T	N	C	C	T	N	T	N	N	C	T	N	T	T	C	C	T	C	T	T	N	Y	N	T	C	C	N	C	T	C	T	C	C	C	C
6060	6060	M6060	SCSC-2_GI_5_1=S	C/A	3	CSC-2_GI_5_1=SCAFFOLD_408=GI_5_2=SCAFFOLD_435=GI_5_3=SCAFFOLD_2402=SCAFFOLD_2024=GI_5_4	5202092	+	N	C	N	C	C	C	A	N	C	C	A	N	A	N	N	C	A	N	A	A	C	C	A	C	A	A	N	M	N	A	C	C	N	C	A	C	A	C	C	C	C
6063	6063	M6063	SCSC-2_GI_5_1=S	C/A	3	CSC-2_GI_5_1=SCAFFOLD_408=GI_5_2=SCAFFOLD_435=GI_5_3=SCAFFOLD_2402=SCAFFOLD_2024=GI_5_4	5217618	+	N	C	N	C	C	C	A	N	C	C	A	N	A	N	N	C	A	N	A	A	C	C	A	C	N	A	N	M	N	A	C	C	N	C	A	C	A	C	C	C	C
6064	6064	M6064	SCSC-2_GI_5_1=S	C/T	3	CSC-2_GI_5_1=SCAFFOLD_408=GI_5_2=SCAFFOLD_435=GI_5_3=SCAFFOLD_2402=SCAFFOLD_2024=GI_5_4	5217619	+	N	C	N	C	C	C	T	N	C	C	T	N	T	N	N	C	T	N	T	T	C	C	T	C	N	T	N	Y	N	T	C	C	N	C	T	C	T	C	C	C	C
6067	6067	M6067	SCSC-2_GI_5_1=S	G/T	3	CSC-2_GI_5_1=SCAFFOLD_408=GI_5_2=SCAFFOLD_435=GI_5_3=SCAFFOLD_2402=SCAFFOLD_2024=GI_5_4	5245983	+	N	G	N	G	G	G	T	N	G	G	T	N	T	N	N	G	T	N	T	T	G	G	T	G	T	T	N	K	N	T	G	G	N	G	T	G	T	G	G	G	G
6068	6068	M6068	SCSC-2_GI_5_1=S	A/T	3	CSC-2_GI_5_1=SCAFFOLD_408=GI_5_2=SCAFFOLD_435=GI_5_3=SCAFFOLD_2402=SCAFFOLD_2024=GI_5_4	5245993	+	N	A	N	A	A	A	T	N	A	A	T	N	T	N	N	A	T	N	T	T	A	A	T	A	T	T	N	W	N	T	A	A	N	A	T	A	T	A	A	A	A
6069	6069	M6069	SCSC-2_GI_5_1=S	A/G	3	CSC-2_GI_5_1=SCAFFOLD_408=GI_5_2=SCAFFOLD_435=GI_5_3=SCAFFOLD_2402=SCAFFOLD_2024=GI_5_4	5245995	+	N	A	N	A	A	A	G	N	A	A	G	N	G	N	N	A	G	N	G	G	A	A	G	A	G	G	N	R	N	G	A	A	N	A	G	A	G	A	A	A	A
6071	6071	M6071	SCSC-2_GI_5_1=S	G/T	3	CSC-2_GI_5_1=SCAFFOLD_408=GI_5_2=SCAFFOLD_435=GI_5_3=SCAFFOLD_2402=SCAFFOLD_2024=GI_5_4	5249327	+	N	G	N	G	G	G	T	N	G	G	T	N	T	N	N	G	T	N	T	T	G	G	T	G	T	T	N	K	N	T	G	G	N	G	T	G	T	G	G	G	G
6072	6072	M6072	SCSC-2_GI_5_1=S	A/C	3	CSC-2_GI_5_1=SCAFFOLD_408=GI_5_2=SCAFFOLD_435=GI_5_3=SCAFFOLD_2402=SCAFFOLD_2024=GI_5_4	5249442	+	N	A	N	A	A	A	C	N	A	A	C	N	C	N	N	A	C	N	C	C	A	A	C	A	N	C	N	M	N	C	A	A	N	A	C	A	C	A	A	A	A
6073	6073	M6073	SCSC-2_GI_5_1=S	G/A	3	CSC-2_GI_5_1=SCAFFOLD_408=GI_5_2=SCAFFOLD_435=GI_5_3=SCAFFOLD_2402=SCAFFOLD_2024=GI_5_4	5249475	+	N	G	N	G	G	G	A	N	G	G	A	N	A	N	N	G	A	N	A	A	G	G	A	G	N	A	N	R	N	A	G	G	N	G	A	G	A	G	G	G	G
6074	6074	M6074	SCSC-2_GI_5_1=S	G/A	3	CSC-2_GI_5_1=SCAFFOLD_408=GI_5_2=SCAFFOLD_435=GI_5_3=SCAFFOLD_2402=SCAFFOLD_2024=GI_5_4	5274775	+	N	G	N	G	G	G	A	N	G	G	A	N	A	N	N	G	A	N	A	A	G	G	A	G	N	A	N	R	N	A	G	G	N	G	A	G	A	G	G	G	G
6075	6075	M6075	SCSC-2_GI_5_1=S	T/C	3	CSC-2_GI_5_1=SCAFFOLD_408=GI_5_2=SCAFFOLD_435=GI_5_3=SCAFFOLD_2402=SCAFFOLD_2024=GI_5_4	5287808	+	N	T	C	T	T	T	C	N	T	T	C	N	C	N	N	T	C	N	C	C	T	T	C	T	N	C	N	Y	N	C	T	T	N	T	C	T	C	T	T	T	T
6076	6076	M6076	SCSC-2_GI_5_1=S	C/T	3	CSC-2_GI_5_1=SCAFFOLD_408=GI_5_2=SCAFFOLD_435=GI_5_3=SCAFFOLD_2402=SCAFFOLD_2024=GI_5_4	5288400	+	N	C	N	C	C	C	T	N	C	C	T	N	T	N	N	C	T	N	T	T	C	C	T	C	N	T	N	Y	N	T	C	C	N	C	T	C	T	C	C	C	C
6077	6077	M6077	SCSC-2_GI_5_1=S	T/A	3	CSC-2_GI_5_1=SCAFFOLD_408=GI_5_2=SCAFFOLD_435=GI_5_3=SCAFFOLD_2402=SCAFFOLD_2024=GI_5_4	5288408	+	N	T	N	T	T	T	A	N	T	T	A	N	A	N	N	T	A	N	A	A	T	T	A	T	N	A	N	W	N	A	T	T	N	T	A	T	A	T	T	T	T
6081	6081	M6081	SCSC-2_GI_5_1=S	G/A	3	CSC-2_GI_5_1=SCAFFOLD_408=GI_5_2=SCAFFOLD_435=GI_5_3=SCAFFOLD_2402=SCAFFOLD_2024=GI_5_4	5288790	+	N	G	N	G	G	G	A	N	G	G	A	N	A	N	N	G	A	N	A	A	G	G	A	G	A	A	N	R	N	A	G	G	N	G	A	G	A	G	G	G	G
6082	6082	M6082	SCSC-2_GI_5_1=S	C/T	3	CSC-2_GI_5_1=SCAFFOLD_408=GI_5_2=SCAFFOLD_435=GI_5_3=SCAFFOLD_2402=SCAFFOLD_2024=GI_5_4	5288828	+	N	C	N	C	C	C	T	N	C	C	T	N	T	N	N	C	T	N	T	T	C	C	T	C	T	T	N	Y	N	T	C	C	N	C	T	C	T	C	C	C	C
6083	6083	M6083	SCSC-2_GI_5_1=S	A/G	3	CSC-2_GI_5_1=SCAFFOLD_408=GI_5_2=SCAFFOLD_435=GI_5_3=SCAFFOLD_2402=SCAFFOLD_2024=GI_5_4	5289062	+	N	A	N	A	A	A	G	N	A	A	G	N	G	N	N	A	N	N	G	R	A	A	G	A	G	G	N	R	N	G	A	A	N	A	G	A	G	A	A	A	A
6084	6084	M6084	SCSC-2_GI_5_1=S	A/G	3	CSC-2_GI_5_1=SCAFFOLD_408=GI_5_2=SCAFFOLD_435=GI_5_3=SCAFFOLD_2402=SCAFFOLD_2024=GI_5_4	5289065	+	N	A	N	A	A	A	G	N	A	A	G	N	G	N	N	A	N	N	G	R	A	A	G	A	G	G	N	R	N	G	A	A	N	A	G	A	G	A	A	A	A
6087	6087	M6087	SCSC-2_GI_5_1=S	T/C	3	CSC-2_GI_5_1=SCAFFOLD_408=GI_5_2=SCAFFOLD_435=GI_5_3=SCAFFOLD_2402=SCAFFOLD_2024=GI_5_4	5345773	+	N	T	N	T	T	T	C	N	T	T	C	N	C	N	N	T	C	N	C	C	T	T	C	T	C	C	N	Y	N	C	T	T	N	T	C	T	C	T	T	T	T
6088	6088	M6088	SCSC-2_GI_5_1=S	G/A	3	CSC-2_GI_5_1=SCAFFOLD_408=GI_5_2=SCAFFOLD_435=GI_5_3=SCAFFOLD_2402=SCAFFOLD_2024=GI_5_4	5345777	+	N	G	N	G	G	G	A	N	G	G	A	N	A	N	N	G	A	N	A	A	G	G	A	G	A	A	N	R	N	A	G	G	N	G	A	G	A	G	G	G	G
6089	6089	M6089	SCSC-2_GI_5_1=S	G/A	3	CSC-2_GI_5_1=SCAFFOLD_408=GI_5_2=SCAFFOLD_435=GI_5_3=SCAFFOLD_2402=SCAFFOLD_2024=GI_5_4	5347915	+	N	G	A	G	G	G	A	N	G	G	A	N	A	N	N	G	A	N	A	A	G	G	A	G	N	A	N	R	N	A	G	G	N	G	A	G	A	G	G	G	G
6090	6090	M6090	SCSC-2_GI_5_1=S	T/C	3	CSC-2_GI_5_1=SCAFFOLD_408=GI_5_2=SCAFFOLD_435=GI_5_3=SCAFFOLD_2402=SCAFFOLD_2024=GI_5_4	5347921	+	N	T	C	T	T	T	C	N	T	T	C	N	C	N	N	T	C	N	C	C	T	T	C	T	N	C	N	Y	N	C	T	T	N	T	C	T	C	T	T	T	T
6091	6091	M6091	SCSC-2_GI_5_1=S	A/C	3	CSC-2_GI_5_1=SCAFFOLD_408=GI_5_2=SCAFFOLD_435=GI_5_3=SCAFFOLD_2402=SCAFFOLD_2024=GI_5_4	5348053	+	N	A	N	A	A	A	C	N	A	N	C	N	C	N	N	A	C	N	C	C	A	A	C	A	N	C	N	M	N	C	A	A	N	A	C	A	C	A	A	A	A
6092	6092	M6092	SCSC-2_GI_5_1=S	T/C	3	CSC-2_GI_5_1=SCAFFOLD_408=GI_5_2=SCAFFOLD_435=GI_5_3=SCAFFOLD_2402=SCAFFOLD_2024=GI_5_4	5398657	+	N	T	N	T	T	T	C	N	T	T	C	N	C	N	N	T	C	N	C	C	T	T	C	T	C	C	N	Y	N	C	T	T	C	T	C	T	C	T	T	T	T
6093	6093	M6093	SCSC-2_GI_5_1=S	C/A	3	CSC-2_GI_5_1=SCAFFOLD_408=GI_5_2=SCAFFOLD_435=GI_5_3=SCAFFOLD_2402=SCAFFOLD_2024=GI_5_4	5398690	+	N	C	N	C	C	C	A	N	C	C	A	N	A	N	N	C	A	N	A	A	C	C	A	C	A	A	N	M	N	A	C	C	A	C	A	C	A	C	C	C	C
6094	6094	M6094	SCSC-2_GI_5_1=S	A/G	3	CSC-2_GI_5_1=SCAFFOLD_408=GI_5_2=SCAFFOLD_435=GI_5_3=SCAFFOLD_2402=SCAFFOLD_2024=GI_5_4	5398699	+	N	A	N	A	A	A	G	N	A	A	G	N	G	N	N	A	G	N	G	G	A	A	G	A	G	G	N	R	N	G	A	A	G	A	G	A	G	A	A	A	A
6095	6095	M6095	SCSC-2_GI_5_1=S	G/A	3	CSC-2_GI_5_1=SCAFFOLD_408=GI_5_2=SCAFFOLD_435=GI_5_3=SCAFFOLD_2402=SCAFFOLD_2024=GI_5_4	5404506	+	N	G	N	G	G	G	A	N	G	G	A	N	A	N	N	G	A	N	A	A	G	G	A	G	A	A	N	R	N	A	G	G	N	G	A	G	A	G	G	G	G
6096	6096	M6096	SCSC-2_GI_5_1=S	C/A	3	CSC-2_GI_5_1=SCAFFOLD_408=GI_5_2=SCAFFOLD_435=GI_5_3=SCAFFOLD_2402=SCAFFOLD_2024=GI_5_4	5404525	+	N	C	N	C	C	C	A	N	C	C	A	N	A	N	N	C	A	N	A	A	C	C	A	C	A	A	N	M	N	A	C	C	N	C	A	C	A	C	C	C	C
6097	6097	M6097	SCSC-2_GI_5_1=S	T/A	3	CSC-2_GI_5_1=SCAFFOLD_408=GI_5_2=SCAFFOLD_435=GI_5_3=SCAFFOLD_2402=SCAFFOLD_2024=GI_5_4	5404973	+	N	T	N	T	T	T	A	N	T	T	A	N	A	N	N	T	A	N	A	A	T	T	A	T	N	A	N	W	N	A	T	T	N	T	A	T	A	T	T	T	T
6098	6098	M6098	SCSC-2_GI_5_1=S	G/A	3	CSC-2_GI_5_1=SCAFFOLD_408=GI_5_2=SCAFFOLD_435=GI_5_3=SCAFFOLD_2402=SCAFFOLD_2024=GI_5_4	5404978	+	N	G	N	G	G	G	A	N	G	G	A	N	A	N	N	G	A	N	A	A	G	G	A	G	N	A	N	R	N	A	G	G	N	G	A	G	A	G	G	G	G
6099	6099	M6099	SCSC-2_GI_5_1=S	G/A	3	CSC-2_GI_5_1=SCAFFOLD_408=GI_5_2=SCAFFOLD_435=GI_5_3=SCAFFOLD_2402=SCAFFOLD_2024=GI_5_4	5439628	+	N	G	N	G	G	G	A	N	G	G	A	N	A	N	N	G	A	N	A	A	G	G	A	G	N	A	N	G	N	A	G	G	N	G	A	G	A	G	G	G	G
6100	6100	M6100	SCSC-2_GI_5_1=S	C/T	3	CSC-2_GI_5_1=SCAFFOLD_408=GI_5_2=SCAFFOLD_435=GI_5_3=SCAFFOLD_2402=SCAFFOLD_2024=GI_5_4	5439697	+	N	C	N	C	C	C	T	N	C	C	T	N	T	N	N	C	T	N	T	T	C	C	T	C	N	T	N	C	N	T	C	C	N	C	T	C	T	C	C	C	C
6101	6101	M6101	SCSC-2_GI_5_1=S	C/A	3	CSC-2_GI_5_1=SCAFFOLD_408=GI_5_2=SCAFFOLD_435=GI_5_3=SCAFFOLD_2402=SCAFFOLD_2024=GI_5_4	5439781	+	N	C	N	C	C	C	A	N	C	C	A	N	A	N	N	C	A	N	A	A	C	C	A	C	A	A	N	C	N	A	C	C	N	C	A	C	A	C	C	C	C
6102	6102	M6102	SCSC-2_GI_5_1=S	T/A	3	CSC-2_GI_5_1=SCAFFOLD_408=GI_5_2=SCAFFOLD_435=GI_5_3=SCAFFOLD_2402=SCAFFOLD_2024=GI_5_4	5439785	+	N	T	N	T	T	T	A	N	T	T	A	N	A	N	N	T	A	N	A	A	T	T	A	T	A	A	N	T	N	A	T	T	N	T	A	T	A	T	T	T	T
6103	6103	M6103	SCSC-2_GI_5_1=S	G/A	3	CSC-2_GI_5_1=SCAFFOLD_408=GI_5_2=SCAFFOLD_435=GI_5_3=SCAFFOLD_2402=SCAFFOLD_2024=GI_5_4	5439790	+	N	G	N	G	G	G	A	N	G	G	A	N	A	N	N	G	A	N	A	A	G	G	A	G	A	A	N	G	N	A	G	G	N	G	A	G	A	G	G	G	G
6104	6104	M6104	SCSC-2_GI_5_1=S	G/A	3	CSC-2_GI_5_1=SCAFFOLD_408=GI_5_2=SCAFFOLD_435=GI_5_3=SCAFFOLD_2402=SCAFFOLD_2024=GI_5_4	5439812	+	N	G	N	G	G	G	A	N	G	G	A	N	A	N	N	G	A	N	A	A	G	G	A	G	A	A	N	G	N	A	G	G	N	G	A	G	A	G	G	G	G
6107	6107	M6107	SCSC-2_GI_5_1=S	T/A	3	CSC-2_GI_5_1=SCAFFOLD_408=GI_5_2=SCAFFOLD_435=GI_5_3=SCAFFOLD_2402=SCAFFOLD_2024=GI_5_4	5444957	+	N	T	N	T	T	T	A	N	T	T	A	N	A	N	N	T	A	N	A	A	T	T	A	T	N	A	N	T	N	A	T	T	N	T	A	T	A	T	T	T	T
6108	6108	M6108	SCSC-2_GI_5_1=S	C/T	3	CSC-2_GI_5_1=SCAFFOLD_408=GI_5_2=SCAFFOLD_435=GI_5_3=SCAFFOLD_2402=SCAFFOLD_2024=GI_5_4	5449480	+	N	C	N	C	C	C	T	N	C	C	T	N	T	N	N	C	T	N	T	T	C	C	T	C	N	T	N	C	N	T	C	C	N	C	T	C	T	C	C	C	C
6109	6109	M6109	SCSC-2_GI_5_1=S	G/T	3	CSC-2_GI_5_1=SCAFFOLD_408=GI_5_2=SCAFFOLD_435=GI_5_3=SCAFFOLD_2402=SCAFFOLD_2024=GI_5_4	5449522	+	N	G	N	G	G	G	T	N	G	G	T	N	T	N	N	G	T	N	T	T	G	G	T	G	N	T	N	G	N	T	G	G	N	G	T	G	T	G	G	G	G
6119	6119	M6119	SCSC-2_GI_5_1=S	T/G	3	CSC-2_GI_5_1=SCAFFOLD_408=GI_5_2=SCAFFOLD_435=GI_5_3=SCAFFOLD_2402=SCAFFOLD_2024=GI_5_4	5474384	+	N	T	N	T	T	T	G	N	T	T	G	N	G	N	N	T	G	N	G	G	T	T	G	T	G	G	N	T	N	G	T	T	N	T	G	T	G	T	T	T	T
6120	6120	M6120	SCSC-2_GI_5_1=S	G/T	3	CSC-2_GI_5_1=SCAFFOLD_408=GI_5_2=SCAFFOLD_435=GI_5_3=SCAFFOLD_2402=SCAFFOLD_2024=GI_5_4	5475241	+	N	G	N	G	G	G	T	N	G	G	T	N	T	N	N	G	T	N	T	T	G	G	T	G	N	T	N	G	N	T	G	G	N	G	T	G	T	G	G	G	G
6121	6121	M6121	SCSC-2_GI_5_1=S	T/C	3	CSC-2_GI_5_1=SCAFFOLD_408=GI_5_2=SCAFFOLD_435=GI_5_3=SCAFFOLD_2402=SCAFFOLD_2024=GI_5_4	5521216	+	N	T	N	T	T	T	C	N	T	T	C	T	T	N	N	T	C	N	C	C	T	T	C	T	C	C	N	T	N	C	T	T	N	T	C	T	C	T	T	T	T
6126	6126	M6126	SCSC-2_GI_5_1=S	C/T	3	CSC-2_GI_5_1=SCAFFOLD_408=GI_5_2=SCAFFOLD_435=GI_5_3=SCAFFOLD_2402=SCAFFOLD_2024=GI_5_4	5766044	+	N	C	T	C	C	C	T	N	C	C	T	N	C	N	N	Y	T	N	T	T	C	C	T	C	N	T	N	C	N	T	C	C	N	C	T	C	C	C	C	C	T
6128	6128	M6128	SCSC-2_GI_5_1=S	C/T	3	CSC-2_GI_5_1=SCAFFOLD_408=GI_5_2=SCAFFOLD_435=GI_5_3=SCAFFOLD_2402=SCAFFOLD_2024=GI_5_4	5876065	+	N	C	N	C	C	C	T	N	C	C	T	N	C	N	N	T	T	N	T	T	C	C	T	C	N	T	N	C	N	T	C	C	N	C	T	C	Y	C	C	C	T
6129	6129	M6129	SCSC-2_GI_5_1=S	C/A	3	CSC-2_GI_5_1=SCAFFOLD_408=GI_5_2=SCAFFOLD_435=GI_5_3=SCAFFOLD_2402=SCAFFOLD_2024=GI_5_4	5876068	+	N	C	N	C	C	C	A	N	C	C	A	N	C	N	N	A	A	N	A	A	C	C	A	C	N	A	N	C	N	A	C	C	N	C	A	C	M	C	C	C	A
6130	6130	M6130	SCSC-2_GI_5_1=S	T/C	3	CSC-2_GI_5_1=SCAFFOLD_408=GI_5_2=SCAFFOLD_435=GI_5_3=SCAFFOLD_2402=SCAFFOLD_2024=GI_5_4	5876092	+	N	T	N	T	T	T	C	N	T	T	C	N	T	N	N	C	C	N	C	C	T	T	C	T	N	C	N	T	N	C	T	T	N	T	C	T	Y	T	T	T	C
6131	6131	M6131	SCSC-2_GI_5_1=S	A/G	3	CSC-2_GI_5_1=SCAFFOLD_408=GI_5_2=SCAFFOLD_435=GI_5_3=SCAFFOLD_2402=SCAFFOLD_2024=GI_5_4	5876149	+	G	A	N	A	A	A	G	N	A	A	G	N	A	N	N	G	G	N	G	G	A	A	G	A	G	G	N	A	N	G	A	A	N	A	G	A	R	A	A	A	G
6132	6132	M6132	SCSC-2_GI_5_1=S	T/C	3	CSC-2_GI_5_1=SCAFFOLD_408=GI_5_2=SCAFFOLD_435=GI_5_3=SCAFFOLD_2402=SCAFFOLD_2024=GI_5_4	5905249	+	C	T	N	T	T	T	C	N	T	T	C	N	T	C	N	C	C	N	C	C	T	T	C	T	C	C	N	T	N	C	T	T	N	T	C	T	Y	T	T	T	C
6133	6133	M6133	SCSC-2_GI_5_1=S	G/A	3	CSC-2_GI_5_1=SCAFFOLD_408=GI_5_2=SCAFFOLD_435=GI_5_3=SCAFFOLD_2402=SCAFFOLD_2024=GI_5_4	5905387	+	N	G	N	G	G	G	A	N	G	G	A	N	G	N	N	A	A	N	A	A	G	G	A	G	N	A	N	G	N	A	G	G	N	G	A	G	R	G	G	G	A
6134	6134	M6134	SCSC-2_GI_5_1=S	G/C	3	CSC-2_GI_5_1=SCAFFOLD_408=GI_5_2=SCAFFOLD_435=GI_5_3=SCAFFOLD_2402=SCAFFOLD_2024=GI_5_4	5937404	+	N	G	N	G	G	G	C	N	G	G	C	N	G	N	N	C	C	N	C	C	G	G	C	G	C	C	N	G	N	C	G	G	N	G	C	G	C	G	G	G	G
6135	6135	M6135	SCSC-2_GI_5_1=S	G/T	3	CSC-2_GI_5_1=SCAFFOLD_408=GI_5_2=SCAFFOLD_435=GI_5_3=SCAFFOLD_2402=SCAFFOLD_2024=GI_5_4	5937579	+	N	G	N	G	G	G	T	N	G	G	T	N	G	N	N	T	T	N	T	T	G	G	T	G	N	T	N	G	N	T	G	G	N	G	T	G	T	G	G	G	G
6136	6136	M6136	SCSC-2_GI_5_1=S	C/T	3	CSC-2_GI_5_1=SCAFFOLD_408=GI_5_2=SCAFFOLD_435=GI_5_3=SCAFFOLD_2402=SCAFFOLD_2024=GI_5_4	5937612	+	N	C	N	C	C	C	T	N	C	C	T	N	C	N	N	T	T	N	T	T	C	C	T	C	N	T	N	C	N	T	C	C	N	C	T	C	T	C	C	C	C
6140	6140	M6140	SCSC-2_GI_5_1=S	C/G	3	CSC-2_GI_5_1=SCAFFOLD_408=GI_5_2=SCAFFOLD_435=GI_5_3=SCAFFOLD_2402=SCAFFOLD_2024=GI_5_4	5983014	+	G	C	N	C	C	C	G	N	C	C	G	N	C	N	N	G	G	N	G	G	C	C	G	C	N	G	N	C	N	G	C	C	N	C	G	C	G	C	C	C	C
6142	6142	M6142	SCSC-2_GI_5_1=S	G/A	3	CSC-2_GI_5_1=SCAFFOLD_408=GI_5_2=SCAFFOLD_435=GI_5_3=SCAFFOLD_2402=SCAFFOLD_2024=GI_5_4	5989114	+	N	G	N	G	G	G	A	N	G	G	A	N	G	N	N	A	A	N	A	A	G	G	A	G	N	A	N	G	N	A	G	G	N	G	A	G	A	G	G	G	G
6143	6143	M6143	SCSC-2_GI_5_1=S	G/A	3	CSC-2_GI_5_1=SCAFFOLD_408=GI_5_2=SCAFFOLD_435=GI_5_3=SCAFFOLD_2402=SCAFFOLD_2024=GI_5_4	5989156	+	N	G	N	G	G	G	A	N	G	G	A	N	G	N	N	A	A	N	A	A	G	G	A	G	N	A	N	G	N	A	G	G	N	G	A	G	A	G	G	G	G
6144	6144	M6144	SCSC-2_GI_5_1=S	T/A	3	CSC-2_GI_5_1=SCAFFOLD_408=GI_5_2=SCAFFOLD_435=GI_5_3=SCAFFOLD_2402=SCAFFOLD_2024=GI_5_4	5992364	+	N	T	A	T	T	T	A	N	T	T	A	N	T	N	N	A	A	N	A	A	T	T	A	T	N	A	N	T	N	A	T	T	N	T	A	T	A	T	T	T	T
6145	6145	M6145	SCSC-2_GI_5_1=S	G/T	3	CSC-2_GI_5_1=SCAFFOLD_408=GI_5_2=SCAFFOLD_435=GI_5_3=SCAFFOLD_2402=SCAFFOLD_2024=GI_5_4	5992502	+	N	G	N	G	G	G	T	N	G	G	T	N	G	N	N	T	T	N	T	T	G	G	T	G	N	T	N	G	N	T	G	G	N	G	T	G	T	G	G	G	G
6146	6146	M6146	SCSC-2_GI_5_1=S	A/G	3	CSC-2_GI_5_1=SCAFFOLD_408=GI_5_2=SCAFFOLD_435=GI_5_3=SCAFFOLD_2402=SCAFFOLD_2024=GI_5_4	5992505	+	N	A	N	A	A	A	G	N	A	A	G	N	A	N	N	G	G	N	G	G	A	A	G	A	N	G	N	A	N	G	A	A	N	A	G	A	G	A	A	A	A
6147	6147	M6147	SCSC-2_GI_5_1=S	G/A	3	CSC-2_GI_5_1=SCAFFOLD_408=GI_5_2=SCAFFOLD_435=GI_5_3=SCAFFOLD_2402=SCAFFOLD_2024=GI_5_4	6017860	+	N	G	N	G	G	G	A	N	G	G	A	N	G	N	N	A	A	N	A	A	G	G	A	G	A	A	N	G	N	A	G	G	A	G	A	G	A	G	G	G	G
6148	6148	M6148	SCSC-2_GI_5_1=S	T/G	3	CSC-2_GI_5_1=SCAFFOLD_408=GI_5_2=SCAFFOLD_435=GI_5_3=SCAFFOLD_2402=SCAFFOLD_2024=GI_5_4	6018036	+	N	T	N	T	T	T	G	N	T	T	G	N	T	N	N	G	G	N	G	G	T	T	G	T	G	G	N	T	N	G	T	T	N	T	G	T	G	T	T	T	T
6149	6149	M6149	SCSC-2_GI_5_1=S	A/G	3	CSC-2_GI_5_1=SCAFFOLD_408=GI_5_2=SCAFFOLD_435=GI_5_3=SCAFFOLD_2402=SCAFFOLD_2024=GI_5_4	6100198	+	N	A	G	A	A	A	G	N	A	A	G	N	A	N	N	G	G	N	G	G	A	A	G	A	A	G	N	A	N	G	A	A	N	A	G	A	G	A	A	A	A
6150	6150	M6150	SCSC-2_GI_5_1=S	C/T	3	CSC-2_GI_5_1=SCAFFOLD_408=GI_5_2=SCAFFOLD_435=GI_5_3=SCAFFOLD_2402=SCAFFOLD_2024=GI_5_4	6100219	+	N	C	T	C	C	C	T	N	C	C	T	N	C	N	N	T	T	N	T	T	C	C	T	C	C	T	N	C	N	T	C	C	N	C	T	C	T	C	C	C	C
6151	6151	M6151	SCSC-2_GI_5_1=S	A/G	3	CSC-2_GI_5_1=SCAFFOLD_408=GI_5_2=SCAFFOLD_435=GI_5_3=SCAFFOLD_2402=SCAFFOLD_2024=GI_5_4	6100237	+	N	A	G	A	A	A	G	N	A	A	G	N	A	N	N	G	G	N	G	G	A	A	G	A	A	G	N	A	N	G	A	A	N	A	G	A	G	A	A	A	A
6152	6152	M6152	SCSC-2_GI_5_1=S	A/C	3	CSC-2_GI_5_1=SCAFFOLD_408=GI_5_2=SCAFFOLD_435=GI_5_3=SCAFFOLD_2402=SCAFFOLD_2024=GI_5_4	6101337	+	N	A	N	A	A	A	C	N	A	A	C	N	A	N	N	C	C	N	C	C	A	A	C	A	A	C	N	A	N	C	A	A	N	A	C	A	C	A	A	A	A
6153	6153	M6153	SCSC-2_GI_5_1=S	T/A	3	CSC-2_GI_5_1=SCAFFOLD_408=GI_5_2=SCAFFOLD_435=GI_5_3=SCAFFOLD_2402=SCAFFOLD_2024=GI_5_4	6101521	+	N	T	N	T	T	T	A	N	T	T	A	N	T	N	N	A	A	N	A	A	T	T	A	T	T	A	N	T	N	A	T	T	N	T	A	T	A	T	T	T	T
6154	6154	M6154	SCSC-2_GI_5_1=S	G/A	3	CSC-2_GI_5_1=SCAFFOLD_408=GI_5_2=SCAFFOLD_435=GI_5_3=SCAFFOLD_2402=SCAFFOLD_2024=GI_5_4	6101568	+	N	G	N	G	G	G	A	N	G	G	A	N	G	N	N	A	A	N	A	A	G	G	A	G	G	A	N	G	N	A	G	G	N	G	A	G	A	G	G	G	G
6158	6158	M6158	SCSC-2_GI_5_1=S	T/G	3	CSC-2_GI_5_1=SCAFFOLD_408=GI_5_2=SCAFFOLD_435=GI_5_3=SCAFFOLD_2402=SCAFFOLD_2024=GI_5_4	6109166	+	N	T	N	T	T	T	G	N	T	T	G	N	T	N	N	G	G	N	G	G	T	T	G	T	T	G	N	T	N	G	T	T	N	T	G	T	G	T	T	T	T
6159	6159	M6159	SCSC-2_GI_5_1=S	T/A	3	CSC-2_GI_5_1=SCAFFOLD_408=GI_5_2=SCAFFOLD_435=GI_5_3=SCAFFOLD_2402=SCAFFOLD_2024=GI_5_4	6109169	+	N	T	N	T	T	T	A	N	T	T	A	N	T	N	N	A	A	N	A	A	T	T	A	T	T	A	N	T	N	A	T	T	N	T	A	T	A	T	T	T	T
6160	6160	M6160	SCSC-2_GI_5_1=S	A/G	3	CSC-2_GI_5_1=SCAFFOLD_408=GI_5_2=SCAFFOLD_435=GI_5_3=SCAFFOLD_2402=SCAFFOLD_2024=GI_5_4	6109193	+	N	A	N	A	A	A	G	N	A	A	G	N	A	N	N	G	G	N	G	G	A	A	G	A	N	G	N	A	N	G	A	A	N	A	G	A	G	A	A	A	A
6161	6161	M6161	SCSC-2_GI_5_1=S	G/C	3	CSC-2_GI_5_1=SCAFFOLD_408=GI_5_2=SCAFFOLD_435=GI_5_3=SCAFFOLD_2402=SCAFFOLD_2024=GI_5_4	6130304	+	N	G	N	G	G	G	C	N	G	G	C	N	G	N	N	C	C	N	C	C	G	G	C	G	G	C	N	G	N	C	G	G	N	G	C	G	C	G	G	G	G
6162	6162	M6162	SCSC-2_GI_5_1=S	C/G	3	CSC-2_GI_5_1=SCAFFOLD_408=GI_5_2=SCAFFOLD_435=GI_5_3=SCAFFOLD_2402=SCAFFOLD_2024=GI_5_4	6130321	+	N	C	N	C	C	C	G	N	C	C	G	N	C	N	N	G	G	N	G	G	C	C	G	C	C	G	N	C	N	G	C	C	N	C	G	C	G	C	C	C	C
6163	6163	M6163	SCSC-2_GI_5_1=S	T/C	3	CSC-2_GI_5_1=SCAFFOLD_408=GI_5_2=SCAFFOLD_435=GI_5_3=SCAFFOLD_2402=SCAFFOLD_2024=GI_5_4	6130358	+	N	T	N	T	T	T	C	N	T	T	C	N	T	N	N	C	C	N	C	C	T	T	C	T	T	C	N	T	N	C	T	T	N	T	C	T	C	T	T	T	T
6164	6164	M6164	SCSC-2_GI_5_1=S	G/A	3	CSC-2_GI_5_1=SCAFFOLD_408=GI_5_2=SCAFFOLD_435=GI_5_3=SCAFFOLD_2402=SCAFFOLD_2024=GI_5_4	6174075	+	N	G	N	G	G	G	A	N	G	G	A	N	G	N	N	A	A	N	A	A	G	G	A	G	N	A	N	G	N	A	G	G	N	G	A	G	A	G	G	G	G
6165	6165	M6165	SCSC-2_GI_5_1=S	A/T	3	CSC-2_GI_5_1=SCAFFOLD_408=GI_5_2=SCAFFOLD_435=GI_5_3=SCAFFOLD_2402=SCAFFOLD_2024=GI_5_4	6174096	+	N	A	N	A	A	A	T	N	A	A	T	N	A	N	N	T	T	N	T	T	A	A	T	A	N	T	N	A	N	T	A	A	N	A	T	A	T	A	A	A	A
6166	6166	M6166	SCSC-2_GI_5_1=S	A/G	3	CSC-2_GI_5_1=SCAFFOLD_408=GI_5_2=SCAFFOLD_435=GI_5_3=SCAFFOLD_2402=SCAFFOLD_2024=GI_5_4	6189594	+	N	A	N	A	A	A	G	N	A	A	G	N	A	N	N	G	G	N	G	G	A	A	G	A	N	G	N	A	N	G	A	A	N	A	G	A	G	A	A	A	A
6167	6167	M6167	SCSC-2_GI_5_1=S	C/T	3	CSC-2_GI_5_1=SCAFFOLD_408=GI_5_2=SCAFFOLD_435=GI_5_3=SCAFFOLD_2402=SCAFFOLD_2024=GI_5_4	6210028	+	N	C	N	C	C	C	T	N	C	C	T	N	C	N	N	T	T	N	T	T	C	C	T	C	N	T	N	C	N	T	C	C	N	C	T	C	T	C	C	C	C
6168	6168	M6168	SCSC-2_GI_5_1=S	T/A	3	CSC-2_GI_5_1=SCAFFOLD_408=GI_5_2=SCAFFOLD_435=GI_5_3=SCAFFOLD_2402=SCAFFOLD_2024=GI_5_4	6210031	+	N	T	N	T	T	T	A	N	T	T	A	N	T	N	N	A	A	N	A	A	T	T	A	T	N	A	N	T	N	A	T	T	N	T	A	T	A	T	T	T	T
6169	6169	M6169	SCSC-2_GI_5_1=S	C/G	3	CSC-2_GI_5_1=SCAFFOLD_408=GI_5_2=SCAFFOLD_435=GI_5_3=SCAFFOLD_2402=SCAFFOLD_2024=GI_5_4	6210037	+	N	C	N	C	C	C	G	N	C	C	G	N	C	N	N	G	G	N	G	G	C	C	G	C	N	G	N	C	N	G	C	C	N	C	G	C	G	C	C	C	C
6170	6170	M6170	SCSC-2_GI_5_1=S	G/A	3	CSC-2_GI_5_1=SCAFFOLD_408=GI_5_2=SCAFFOLD_435=GI_5_3=SCAFFOLD_2402=SCAFFOLD_2024=GI_5_4	6210040	+	N	G	N	G	G	G	A	N	G	G	A	N	G	N	N	A	A	N	A	A	G	G	A	G	N	A	N	G	N	A	G	G	N	G	A	G	A	G	G	G	G
6171	6171	M6171	SCSC-2_GI_5_1=S	T/C	3	CSC-2_GI_5_1=SCAFFOLD_408=GI_5_2=SCAFFOLD_435=GI_5_3=SCAFFOLD_2402=SCAFFOLD_2024=GI_5_4	6210118	+	N	T	N	T	T	T	C	N	T	T	C	N	T	N	N	C	C	N	C	C	T	T	C	T	N	C	N	T	N	C	T	T	N	T	C	T	C	T	T	T	T
6172	6172	M6172	SCSC-2_GI_5_1=S	C/T	3	CSC-2_GI_5_1=SCAFFOLD_408=GI_5_2=SCAFFOLD_435=GI_5_3=SCAFFOLD_2402=SCAFFOLD_2024=GI_5_4	6210121	+	N	C	N	C	C	C	T	N	C	C	T	N	C	N	N	T	T	N	T	T	C	C	T	C	N	T	N	C	N	T	C	C	N	C	T	C	T	C	C	C	C
6173	6173	M6173	SCSC-2_GI_5_1=S	G/A	3	CSC-2_GI_5_1=SCAFFOLD_408=GI_5_2=SCAFFOLD_435=GI_5_3=SCAFFOLD_2402=SCAFFOLD_2024=GI_5_4	6210163	+	N	G	N	G	G	G	A	N	G	G	A	N	G	N	N	A	A	N	A	A	G	G	A	G	N	A	N	G	N	A	G	G	N	G	A	G	A	G	G	G	G
6174	6174	M6174	SCSC-2_GI_5_1=S	A/C	3	CSC-2_GI_5_1=SCAFFOLD_408=GI_5_2=SCAFFOLD_435=GI_5_3=SCAFFOLD_2402=SCAFFOLD_2024=GI_5_4	6211578	+	N	A	N	A	A	A	C	N	A	A	C	N	A	N	N	C	C	N	C	C	A	A	C	A	N	C	N	A	N	C	A	A	N	A	C	A	C	A	A	A	A
6175	6175	M6175	SCSC-2_GI_5_1=S	C/A	3	CSC-2_GI_5_1=SCAFFOLD_408=GI_5_2=SCAFFOLD_435=GI_5_3=SCAFFOLD_2402=SCAFFOLD_2024=GI_5_4	6212024	+	N	C	N	C	C	C	A	N	C	C	A	N	C	N	N	A	A	N	A	A	C	C	A	C	C	A	N	C	N	A	C	C	N	C	A	C	A	C	C	C	C
6176	6176	M6176	SCSC-2_GI_5_1=S	G/A	3	CSC-2_GI_5_1=SCAFFOLD_408=GI_5_2=SCAFFOLD_435=GI_5_3=SCAFFOLD_2402=SCAFFOLD_2024=GI_5_4	6212075	+	N	G	N	G	G	G	A	N	G	G	A	N	G	N	N	A	A	N	A	A	G	G	A	G	G	A	N	G	N	A	G	G	N	G	A	G	A	G	G	G	G
6177	6177	M6177	SCSC-2_GI_5_1=S	T/C	3	CSC-2_GI_5_1=SCAFFOLD_408=GI_5_2=SCAFFOLD_435=GI_5_3=SCAFFOLD_2402=SCAFFOLD_2024=GI_5_4	6212456	+	N	T	N	T	T	T	C	N	T	T	C	N	T	N	N	C	C	N	C	C	T	T	C	T	N	C	N	T	N	C	T	T	N	T	C	T	C	T	T	T	T
6178	6178	M6178	SCSC-2_GI_5_1=S	T/C	3	CSC-2_GI_5_1=SCAFFOLD_408=GI_5_2=SCAFFOLD_435=GI_5_3=SCAFFOLD_2402=SCAFFOLD_2024=GI_5_4	6212921	+	N	T	N	T	T	T	C	N	T	T	C	N	T	N	N	C	C	N	C	C	T	T	C	T	T	C	N	T	N	C	T	T	N	T	C	T	C	T	T	T	T
6179	6179	M6179	SCSC-2_GI_5_1=S	T/C	3	CSC-2_GI_5_1=SCAFFOLD_408=GI_5_2=SCAFFOLD_435=GI_5_3=SCAFFOLD_2402=SCAFFOLD_2024=GI_5_4	6212935	+	N	T	N	T	T	T	C	N	T	T	C	N	T	N	N	C	C	N	C	C	T	T	C	T	T	C	N	T	N	C	T	T	N	T	C	T	C	T	T	T	T
6184	6184	M6184	SCSC-2_GI_5_1=S	T/C	3	CSC-2_GI_5_1=SCAFFOLD_408=GI_5_2=SCAFFOLD_435=GI_5_3=SCAFFOLD_2402=SCAFFOLD_2024=GI_5_4	6254040	+	N	T	N	T	T	T	C	N	T	T	C	N	T	N	N	C	C	N	C	C	T	T	C	T	N	C	N	T	N	C	T	T	N	T	C	T	C	T	T	T	T
6185	6185	M6185	SCSC-2_GI_5_1=S	G/T	3	CSC-2_GI_5_1=SCAFFOLD_408=GI_5_2=SCAFFOLD_435=GI_5_3=SCAFFOLD_2402=SCAFFOLD_2024=GI_5_4	6254055	+	N	G	N	G	G	G	T	N	G	G	T	N	G	N	N	T	T	N	T	T	G	G	T	G	N	T	N	G	N	T	G	G	N	G	T	G	T	G	G	G	G
6186	6186	M6186	SCSC-2_GI_5_1=S	T/C	3	CSC-2_GI_5_1=SCAFFOLD_408=GI_5_2=SCAFFOLD_435=GI_5_3=SCAFFOLD_2402=SCAFFOLD_2024=GI_5_4	6254060	+	N	T	N	T	T	T	C	N	T	T	C	N	T	N	N	C	C	N	C	C	T	T	C	T	N	C	N	T	N	C	T	T	N	T	C	T	C	T	T	T	T
6187	6187	M6187	SCSC-2_GI_5_1=S	G/T	3	CSC-2_GI_5_1=SCAFFOLD_408=GI_5_2=SCAFFOLD_435=GI_5_3=SCAFFOLD_2402=SCAFFOLD_2024=GI_5_4	6259124	+	N	G	N	G	G	G	T	N	G	G	T	N	G	N	N	T	T	N	T	T	G	G	T	G	N	T	N	G	N	T	G	G	N	G	T	G	T	G	G	G	G
6188	6188	M6188	SCSC-2_GI_5_1=S	A/C	3	CSC-2_GI_5_1=SCAFFOLD_408=GI_5_2=SCAFFOLD_435=GI_5_3=SCAFFOLD_2402=SCAFFOLD_2024=GI_5_4	6259142	+	N	A	N	A	A	A	C	N	A	A	C	N	A	N	N	C	C	N	C	C	A	A	C	A	N	C	N	A	N	C	A	A	N	A	C	A	C	A	A	A	A
6189	6189	M6189	SCSC-2_GI_5_1=S	A/G	3	CSC-2_GI_5_1=SCAFFOLD_408=GI_5_2=SCAFFOLD_435=GI_5_3=SCAFFOLD_2402=SCAFFOLD_2024=GI_5_4	6259175	+	N	A	N	A	A	A	G	N	A	A	G	N	A	N	N	G	G	N	G	G	A	A	G	A	N	G	N	A	N	G	A	A	N	A	G	A	G	A	A	A	A
6190	6190	M6190	SCSC-2_GI_5_1=S	A/C	3	CSC-2_GI_5_1=SCAFFOLD_408=GI_5_2=SCAFFOLD_435=GI_5_3=SCAFFOLD_2402=SCAFFOLD_2024=GI_5_4	6259358	+	N	A	C	A	A	A	C	N	A	A	C	N	A	N	N	C	C	N	C	C	A	A	C	A	N	C	N	A	N	C	A	A	N	A	C	A	C	A	A	A	A
6192	6192	M6192	SCSC-2_GI_5_1=S	T/C	3	CSC-2_GI_5_1=SCAFFOLD_408=GI_5_2=SCAFFOLD_435=GI_5_3=SCAFFOLD_2402=SCAFFOLD_2024=GI_5_4	6505438	+	T	T	N	T	T	T	C	N	T	T	C	N	T	N	N	C	C	N	T	C	T	T	T	T	N	C	N	T	N	C	T	T	N	T	C	T	C	T	C	T	T
6204	6204	M6204	SCSC-2_GI_5_1=S	C/A	3	CSC-2_GI_5_1=SCAFFOLD_408=GI_5_2=SCAFFOLD_435=GI_5_3=SCAFFOLD_2402=SCAFFOLD_2024=GI_5_4	6649195	+	N	A	N	A	A	A	C	N	A	A	C	N	A	N	N	C	C	N	A	C	A	A	A	A	N	C	N	A	N	C	A	A	N	A	C	A	C	A	C	A	A
6205	6205	M6205	SCSC-2_GI_5_1=S	T/G	3	CSC-2_GI_5_1=SCAFFOLD_408=GI_5_2=SCAFFOLD_435=GI_5_3=SCAFFOLD_2402=SCAFFOLD_2024=GI_5_4	6649197	+	N	G	N	G	G	G	T	N	G	G	T	N	G	N	N	T	T	N	G	T	G	G	G	G	N	T	N	G	N	T	G	G	N	G	T	G	T	G	T	G	G
6206	6206	M6206	SCSC-2_GI_5_1=S	A/G	3	CSC-2_GI_5_1=SCAFFOLD_408=GI_5_2=SCAFFOLD_435=GI_5_3=SCAFFOLD_2402=SCAFFOLD_2024=GI_5_4	6649204	+	N	G	N	G	G	G	A	N	G	G	A	N	G	N	N	A	A	N	G	A	G	G	G	G	N	A	N	G	N	A	G	G	N	G	A	G	A	G	A	G	G
6207	6207	M6207	SCSC-2_GI_5_1=S	G/A	3	CSC-2_GI_5_1=SCAFFOLD_408=GI_5_2=SCAFFOLD_435=GI_5_3=SCAFFOLD_2402=SCAFFOLD_2024=GI_5_4	6813297	+	N	G	N	G	G	G	A	N	G	G	A	N	G	N	N	A	A	N	G	A	G	G	G	G	N	A	N	G	N	A	G	G	N	G	A	G	A	G	A	G	G
6208	6208	M6208	SCSC-2_GI_5_1=S	T/C	3	CSC-2_GI_5_1=SCAFFOLD_408=GI_5_2=SCAFFOLD_435=GI_5_3=SCAFFOLD_2402=SCAFFOLD_2024=GI_5_4	6813312	+	N	T	N	T	T	T	C	N	T	T	C	N	T	N	N	C	C	N	T	C	T	T	T	T	N	C	N	T	N	C	T	T	N	T	C	T	C	T	C	T	T
6209	6209	M6209	SCSC-2_GI_5_1=S	C/A	3	CSC-2_GI_5_1=SCAFFOLD_408=GI_5_2=SCAFFOLD_435=GI_5_3=SCAFFOLD_2402=SCAFFOLD_2024=GI_5_4	6884946	+	C	C	N	C	C	C	A	N	C	C	A	N	C	N	N	A	A	N	C	A	C	C	C	C	C	A	N	C	N	A	C	C	N	C	A	C	A	C	A	C	C
6210	6210	M6210	SCSC-2_GI_5_1=S	A/G	3	CSC-2_GI_5_1=SCAFFOLD_408=GI_5_2=SCAFFOLD_435=GI_5_3=SCAFFOLD_2402=SCAFFOLD_2024=GI_5_4	6887752	+	A	A	N	A	A	A	G	N	A	A	G	N	A	N	N	G	G	N	A	G	A	A	A	A	A	G	N	A	N	G	A	A	N	A	G	A	G	A	G	A	A
6211	6211	M6211	SCSC-2_GI_5_1=S	A/C	3	CSC-2_GI_5_1=SCAFFOLD_408=GI_5_2=SCAFFOLD_435=GI_5_3=SCAFFOLD_2402=SCAFFOLD_2024=GI_5_4	6905072	+	N	A	N	A	A	A	C	N	A	A	C	N	A	N	N	C	C	N	A	C	A	A	A	A	A	C	N	A	N	C	A	A	N	A	C	A	C	A	C	A	A
6212	6212	M6212	SCSC-2_GI_5_1=S	T/G	3	CSC-2_GI_5_1=SCAFFOLD_408=GI_5_2=SCAFFOLD_435=GI_5_3=SCAFFOLD_2402=SCAFFOLD_2024=GI_5_4	6909283	+	T	T	N	T	T	T	G	N	T	T	G	N	T	N	N	G	G	N	T	G	T	T	T	T	T	G	N	T	N	G	T	T	N	T	G	T	G	T	G	T	T
6213	6213	M6213	SCSC-2_GI_5_1=S	A/G	3	CSC-2_GI_5_1=SCAFFOLD_408=GI_5_2=SCAFFOLD_435=GI_5_3=SCAFFOLD_2402=SCAFFOLD_2024=GI_5_4	6909661	+	N	A	N	A	A	A	G	N	A	A	G	N	A	N	N	G	G	N	A	G	A	A	A	A	N	G	N	A	N	G	A	A	N	A	G	A	G	A	G	A	A
6214	6214	M6214	SCSC-2_GI_5_1=S	T/A	3	CSC-2_GI_5_1=SCAFFOLD_408=GI_5_2=SCAFFOLD_435=GI_5_3=SCAFFOLD_2402=SCAFFOLD_2024=GI_5_4	6911132	+	N	T	N	T	T	T	A	N	T	T	A	N	T	N	N	A	A	N	T	A	T	T	T	T	T	A	N	T	N	A	T	T	A	T	A	T	A	T	A	T	T
6253	6253	M6253	SCSC-2_GI_5_1=S	A/G	3	CSC-2_GI_5_1=SCAFFOLD_408=GI_5_2=SCAFFOLD_435=GI_5_3=SCAFFOLD_2402=SCAFFOLD_2024=GI_5_4	7122349	+	N	A	N	A	A	A	G	N	A	A	G	N	A	N	N	G	G	N	R	G	A	A	A	A	A	G	N	A	N	G	A	A	N	A	G	A	G	A	G	A	A
6254	6254	M6254	SCSC-2_GI_5_1=S	C/A	3	CSC-2_GI_5_1=SCAFFOLD_408=GI_5_2=SCAFFOLD_435=GI_5_3=SCAFFOLD_2402=SCAFFOLD_2024=GI_5_4	7181128	+	C	C	N	C	C	C	A	N	C	C	A	N	C	N	N	A	A	N	C	A	C	C	C	C	C	A	N	C	N	A	C	C	N	C	A	C	A	C	A	C	C
6255	6255	M6255	SCSC-2_GI_5_1=S	T/C	3	CSC-2_GI_5_1=SCAFFOLD_408=GI_5_2=SCAFFOLD_435=GI_5_3=SCAFFOLD_2402=SCAFFOLD_2024=GI_5_4	7181139	+	T	T	N	T	T	T	C	N	T	T	C	N	T	N	N	C	C	N	T	C	T	T	T	T	T	C	N	T	N	C	T	T	N	T	C	T	C	T	C	T	T
6256	6256	M6256	SCSC-2_GI_5_1=S	A/C	3	CSC-2_GI_5_1=SCAFFOLD_408=GI_5_2=SCAFFOLD_435=GI_5_3=SCAFFOLD_2402=SCAFFOLD_2024=GI_5_4	7181186	+	A	A	N	A	A	A	C	N	A	A	C	N	A	N	N	C	C	N	A	C	A	A	A	A	A	C	N	A	N	C	A	A	N	A	C	A	C	A	C	A	A
6257	6257	M6257	SCSC-2_GI_5_1=S	C/A	3	CSC-2_GI_5_1=SCAFFOLD_408=GI_5_2=SCAFFOLD_435=GI_5_3=SCAFFOLD_2402=SCAFFOLD_2024=GI_5_4	7181187	+	C	C	N	C	C	C	A	N	C	C	A	N	C	N	N	A	A	N	C	A	C	C	C	C	C	A	N	C	N	A	C	C	N	C	A	C	A	C	A	C	C
6258	6258	M6258	SCSC-2_GI_5_1=S	C/A	3	CSC-2_GI_5_1=SCAFFOLD_408=GI_5_2=SCAFFOLD_435=GI_5_3=SCAFFOLD_2402=SCAFFOLD_2024=GI_5_4	7190449	+	N	C	N	C	C	C	A	N	C	C	A	N	C	N	N	A	A	N	C	A	C	C	C	C	N	A	N	C	N	A	C	C	N	C	A	C	A	C	A	C	C
6259	6259	M6259	SCSC-2_GI_5_1=S	A/G	3	CSC-2_GI_5_1=SCAFFOLD_408=GI_5_2=SCAFFOLD_435=GI_5_3=SCAFFOLD_2402=SCAFFOLD_2024=GI_5_4	7190479	+	N	A	N	A	A	A	G	N	A	A	G	N	A	N	N	G	G	N	A	G	A	A	A	A	N	G	N	A	N	G	A	A	N	A	G	A	G	A	G	A	A
6260	6260	M6260	SCSC-2_GI_5_1=S	C/T	3	CSC-2_GI_5_1=SCAFFOLD_408=GI_5_2=SCAFFOLD_435=GI_5_3=SCAFFOLD_2402=SCAFFOLD_2024=GI_5_4	7190530	+	N	C	N	C	C	C	T	N	C	C	T	N	C	N	N	T	T	N	C	T	C	C	C	C	C	T	N	C	N	T	C	C	N	C	T	C	T	C	T	C	C
6261	6261	M6261	SCSC-2_GI_5_1=S	T/A	3	CSC-2_GI_5_1=SCAFFOLD_408=GI_5_2=SCAFFOLD_435=GI_5_3=SCAFFOLD_2402=SCAFFOLD_2024=GI_5_4	7190707	+	N	T	N	T	T	T	A	N	T	T	A	N	T	N	N	A	A	N	T	A	T	T	T	T	T	A	N	T	N	A	T	T	N	T	A	T	A	T	A	T	T
6262	6262	M6262	SCSC-2_GI_5_1=S	A/C	3	CSC-2_GI_5_1=SCAFFOLD_408=GI_5_2=SCAFFOLD_435=GI_5_3=SCAFFOLD_2402=SCAFFOLD_2024=GI_5_4	7190710	+	N	A	N	A	A	A	C	N	A	A	C	N	A	N	N	C	C	N	A	C	A	A	A	A	A	C	N	A	N	C	A	A	N	A	C	A	C	A	C	A	A
6263	6263	M6263	SCSC-2_GI_5_1=S	A/T	3	CSC-2_GI_5_1=SCAFFOLD_408=GI_5_2=SCAFFOLD_435=GI_5_3=SCAFFOLD_2402=SCAFFOLD_2024=GI_5_4	7190719	+	N	A	N	A	A	A	T	N	A	A	T	N	A	N	N	T	T	N	A	T	A	A	A	A	A	T	N	A	N	T	A	A	N	A	T	A	T	A	T	A	A
6264	6264	M6264	SCSC-2_GI_5_1=S	T/A	3	CSC-2_GI_5_1=SCAFFOLD_408=GI_5_2=SCAFFOLD_435=GI_5_3=SCAFFOLD_2402=SCAFFOLD_2024=GI_5_4	7190761	+	N	T	N	T	T	T	A	N	T	T	A	N	T	N	N	A	A	N	T	A	T	T	T	T	N	A	N	T	N	A	T	T	N	T	A	T	A	T	A	T	T
6354	6354	M6354	SCSC-2_GI_5_1=S	G/A	3	CSC-2_GI_5_1=SCAFFOLD_408=GI_5_2=SCAFFOLD_435=GI_5_3=SCAFFOLD_2402=SCAFFOLD_2024=GI_5_4	7321117	+	G	G	N	G	G	G	A	N	G	G	A	N	G	N	N	A	A	N	G	A	G	G	G	G	G	A	N	G	N	A	G	G	A	G	A	G	A	G	A	G	G
6355	6355	M6355	SCSC-2_GI_5_1=S	C/A	3	CSC-2_GI_5_1=SCAFFOLD_408=GI_5_2=SCAFFOLD_435=GI_5_3=SCAFFOLD_2402=SCAFFOLD_2024=GI_5_4	7321129	+	C	C	N	C	C	C	A	N	C	C	A	N	C	N	N	A	A	N	C	A	C	C	C	C	C	A	N	C	N	A	C	C	A	C	A	C	A	C	A	C	C
6361	6361	M6361	SCSC-2_GI_5_1=S	T/C	3	CSC-2_GI_5_1=SCAFFOLD_408=GI_5_2=SCAFFOLD_435=GI_5_3=SCAFFOLD_2402=SCAFFOLD_2024=GI_5_4	7572210	+	N	T	N	T	T	T	C	N	T	T	C	N	T	C	N	T	C	N	T	C	T	T	C	T	T	C	N	T	N	C	T	Y	N	T	C	T	C	T	C	T	T
6365	6365	M6365	SCSC-2_GI_5_1=S	C/T	3	CSC-2_GI_5_1=SCAFFOLD_408=GI_5_2=SCAFFOLD_435=GI_5_3=SCAFFOLD_2402=SCAFFOLD_2024=GI_5_4	7595420	+	N	C	N	C	C	C	T	N	C	C	T	N	C	N	N	C	T	N	C	T	C	C	T	C	C	T	N	C	N	T	C	Y	N	C	T	C	T	C	T	C	C
6367	6367	M6367	SCSC-2_GI_5_1=S	G/A	3	CSC-2_GI_5_1=SCAFFOLD_408=GI_5_2=SCAFFOLD_435=GI_5_3=SCAFFOLD_2402=SCAFFOLD_2024=GI_5_4	7760904	+	N	G	N	G	G	G	A	N	G	G	A	N	G	N	N	G	A	N	G	A	G	A	A	G	G	A	N	G	N	A	G	R	N	G	A	G	A	G	A	G	G
6368	6368	M6368	SCSC-2_GI_5_1=S	T/G	3	CSC-2_GI_5_1=SCAFFOLD_408=GI_5_2=SCAFFOLD_435=GI_5_3=SCAFFOLD_2402=SCAFFOLD_2024=GI_5_4	7769092	+	N	T	N	T	T	T	G	N	T	T	G	N	T	N	N	T	G	N	T	G	T	G	G	T	N	G	N	T	N	G	T	K	N	T	G	T	G	T	G	T	T
6369	6369	M6369	SCSC-2_GI_5_1=S	T/G	3	CSC-2_GI_5_1=SCAFFOLD_408=GI_5_2=SCAFFOLD_435=GI_5_3=SCAFFOLD_2402=SCAFFOLD_2024=GI_5_4	7843705	+	T	T	N	T	T	T	G	N	T	T	T	N	T	N	N	T	T	N	T	G	T	G	G	T	T	G	N	T	N	G	T	K	N	T	G	T	G	T	G	T	T
6370	6370	M6370	SCSC-2_GI_5_1=S	T/G	3	CSC-2_GI_5_1=SCAFFOLD_408=GI_5_2=SCAFFOLD_435=GI_5_3=SCAFFOLD_2402=SCAFFOLD_2024=GI_5_4	7885147	+	N	T	N	T	T	T	T	N	T	T	T	N	T	N	N	T	T	N	T	G	T	G	G	T	N	G	N	T	N	G	T	K	N	T	G	T	G	T	G	T	T
6591	6591	M6591	SCSC-2_GI_5_1=S	A/G	3	CSC-2_GI_5_1=SCAFFOLD_408=GI_5_2=SCAFFOLD_435=GI_5_3=SCAFFOLD_2402=SCAFFOLD_2024=GI_5_4	8370026	+	N	A	N	A	A	A	A	N	A	A	A	N	A	N	N	A	A	N	A	G	A	G	G	A	A	G	N	A	N	G	A	R	N	A	G	A	G	A	G	A	A
6592	6592	M6592	SCSC-2_GI_5_1=S	T/G	3	CSC-2_GI_5_1=SCAFFOLD_408=GI_5_2=SCAFFOLD_435=GI_5_3=SCAFFOLD_2402=SCAFFOLD_2024=GI_5_4	8370666	+	N	T	G	T	T	T	T	N	T	T	T	N	T	N	N	T	T	N	T	G	T	G	G	T	T	G	N	T	N	G	T	K	N	T	G	T	G	T	G	T	T
6728	6728	M6728	SCSC-2_GI_5_1=S	T/A	3	CSC-2_GI_5_1=SCAFFOLD_408=GI_5_2=SCAFFOLD_435=GI_5_3=SCAFFOLD_2402=SCAFFOLD_2024=GI_5_4	8448110	+	N	T	N	T	T	T	T	N	T	T	T	N	T	N	N	T	T	N	T	A	T	A	A	T	N	A	N	T	N	A	T	W	N	T	A	T	A	T	A	T	T
6744	6744	M6744	SCSC-2_GI_5_1=S	A/G	3	CSC-2_GI_5_1=SCAFFOLD_408=GI_5_2=SCAFFOLD_435=GI_5_3=SCAFFOLD_2402=SCAFFOLD_2024=GI_5_4	8565086	+	N	A	N	A	A	A	A	N	A	A	A	N	A	N	N	A	A	N	A	G	A	G	G	A	N	G	N	A	N	G	A	R	N	A	G	A	G	A	G	A	A
6745	6745	M6745	SCSC-2_GI_5_1=S	G/A	3	CSC-2_GI_5_1=SCAFFOLD_408=GI_5_2=SCAFFOLD_435=GI_5_3=SCAFFOLD_2402=SCAFFOLD_2024=GI_5_4	8565138	+	N	G	N	G	G	G	G	N	G	G	G	N	G	N	N	G	G	N	G	A	G	A	A	G	N	A	N	G	N	A	G	R	N	G	A	G	A	G	A	G	G
6754	6754	M6754	SCSC-2_GI_5_1=S	G/C	3	CSC-2_GI_5_1=SCAFFOLD_408=GI_5_2=SCAFFOLD_435=GI_5_3=SCAFFOLD_2402=SCAFFOLD_2024=GI_5_4	8586498	+	N	G	N	G	G	G	G	N	G	G	G	N	G	N	N	G	G	N	G	C	G	C	C	G	G	C	N	G	N	C	G	S	N	G	C	G	C	G	C	G	G
6937	6937	M6937	SCSC-2_GI_5_1=S	A/G	3	CSC-2_GI_5_1=SCAFFOLD_408=GI_5_2=SCAFFOLD_435=GI_5_3=SCAFFOLD_2402=SCAFFOLD_2024=GI_5_4	8837676	+	N	A	N	A	A	A	A	N	A	A	A	N	A	N	N	A	A	N	A	G	A	G	G	A	N	G	N	A	N	G	A	R	N	A	G	A	G	A	G	A	A
6950	6950	M6950	SCSC-2_GI_5_1=S	G/A	3	CSC-2_GI_5_1=SCAFFOLD_408=GI_5_2=SCAFFOLD_435=GI_5_3=SCAFFOLD_2402=SCAFFOLD_2024=GI_5_4	8887052	+	N	G	N	G	G	G	G	N	G	G	G	N	G	N	N	G	G	N	G	A	G	A	A	G	G	A	N	G	N	A	G	R	N	G	A	G	A	G	A	G	G
6992	6992	M6992	SCSC-2_GI_5_1=S	A/G	3	CSC-2_GI_5_1=SCAFFOLD_408=GI_5_2=SCAFFOLD_435=GI_5_3=SCAFFOLD_2402=SCAFFOLD_2024=GI_5_4	9045716	+	N	A	N	A	A	A	A	N	A	A	A	N	A	N	N	A	A	N	A	G	A	G	G	A	N	G	N	A	N	G	A	R	N	A	G	A	G	A	G	A	A
6993	6993	M6993	SCSC-2_GI_5_1=S	A/C	3	CSC-2_GI_5_1=SCAFFOLD_408=GI_5_2=SCAFFOLD_435=GI_5_3=SCAFFOLD_2402=SCAFFOLD_2024=GI_5_4	9049568	+	N	A	N	A	A	A	A	N	A	A	A	N	A	N	N	A	A	N	A	C	A	C	C	A	A	C	N	A	N	C	A	M	N	A	C	A	C	A	C	A	A
7027	7027	M7027	SCSC-2_GI_5_1=S	C/A	3	CSC-2_GI_5_1=SCAFFOLD_408=GI_5_2=SCAFFOLD_435=GI_5_3=SCAFFOLD_2402=SCAFFOLD_2024=GI_5_4	9129469	+	N	C	N	C	C	C	C	N	C	C	C	N	C	N	N	C	C	N	C	A	C	A	A	C	N	A	N	C	N	A	C	M	N	C	A	C	A	C	A	C	C
7028	7028	M7028	SCSC-2_GI_5_1=S	G/C	3	CSC-2_GI_5_1=SCAFFOLD_408=GI_5_2=SCAFFOLD_435=GI_5_3=SCAFFOLD_2402=SCAFFOLD_2024=GI_5_4	9135603	+	N	G	N	G	G	G	G	N	G	G	G	N	G	N	N	G	G	N	G	C	G	C	C	G	N	C	N	G	N	C	G	S	N	G	C	G	C	G	C	G	G
7225	7225	M7225	SCSC-2_GI_5_1=S	G/A	3	CSC-2_GI_5_1=SCAFFOLD_408=GI_5_2=SCAFFOLD_435=GI_5_3=SCAFFOLD_2402=SCAFFOLD_2024=GI_5_4	9345668	+	N	G	N	G	G	G	G	N	G	G	G	N	G	N	N	G	G	N	G	A	G	A	A	G	G	A	N	G	N	A	G	R	N	G	A	G	A	G	A	G	G
7226	7226	M7226	SCSC-2_GI_5_1=S	G/C	3	CSC-2_GI_5_1=SCAFFOLD_408=GI_5_2=SCAFFOLD_435=GI_5_3=SCAFFOLD_2402=SCAFFOLD_2024=GI_5_4	9345675	+	N	G	N	G	G	G	G	N	G	G	G	N	G	N	N	G	G	N	G	C	G	C	C	G	G	C	N	G	N	C	G	S	N	G	C	G	C	G	C	G	G
7389	7389	M7389	SCSC-2_GI_5_1=S	T/C	3	CSC-2_GI_5_1=SCAFFOLD_408=GI_5_2=SCAFFOLD_435=GI_5_3=SCAFFOLD_2402=SCAFFOLD_2024=GI_5_4	9427669	+	T	T	N	T	T	T	T	N	T	T	T	N	T	N	N	T	T	N	T	C	T	C	C	T	T	C	N	T	N	C	T	Y	N	T	C	T	C	T	C	T	T
7659	7659	M7659	SCSC-2_GI_5_1=S	C/T	3	CSC-2_GI_5_1=SCAFFOLD_408=GI_5_2=SCAFFOLD_435=GI_5_3=SCAFFOLD_2402=SCAFFOLD_2024=GI_5_4	9695846	+	N	C	N	T	T	C	C	N	C	C	C	N	C	N	N	C	C	N	T	C	T	T	T	C	N	T	N	T	N	C	C	C	N	T	C	C	C	T	C	T	T
7661	7661	M7661	SCSC-2_GI_5_1=S	T/C	3	CSC-2_GI_5_1=SCAFFOLD_408=GI_5_2=SCAFFOLD_435=GI_5_3=SCAFFOLD_2402=SCAFFOLD_2024=GI_5_4	9713574	+	T	T	N	C	C	T	T	N	T	T	T	N	T	N	N	T	T	N	C	T	C	C	C	T	N	C	N	C	N	T	T	T	N	C	T	T	T	C	T	C	C
7966	7966	M7966	SCSC-2_GI_5_1=S	A/G	3	CSC-2_GI_5_1=SCAFFOLD_408=GI_5_2=SCAFFOLD_435=GI_5_3=SCAFFOLD_2402=SCAFFOLD_2024=GI_5_4	9910031	+	N	A	N	A	A	A	A	N	A	A	A	N	A	N	N	A	A	N	A	G	A	G	G	A	N	G	N	A	N	G	A	R	N	A	G	A	G	A	G	A	A
8043	8043	M8043	SCSC-2_GI_5_1=S	G/A	3	CSC-2_GI_5_1=SCAFFOLD_408=GI_5_2=SCAFFOLD_435=GI_5_3=SCAFFOLD_2402=SCAFFOLD_2024=GI_5_4	10142257	+	N	G	N	G	G	G	G	N	G	G	G	N	G	N	N	G	G	N	G	A	G	A	A	G	G	A	N	G	N	A	G	R	N	G	A	G	A	G	A	G	G
8044	8044	M8044	SCSC-2_GI_5_1=S	A/G	3	CSC-2_GI_5_1=SCAFFOLD_408=GI_5_2=SCAFFOLD_435=GI_5_3=SCAFFOLD_2402=SCAFFOLD_2024=GI_5_4	10142409	+	N	A	N	A	A	A	A	N	A	A	A	N	A	N	N	A	A	N	A	G	A	G	G	A	A	G	N	A	N	G	A	R	N	A	G	A	G	A	G	A	A
8045	8045	M8045	SCSC-2_GI_5_1=S	C/T	3	CSC-2_GI_5_1=SCAFFOLD_408=GI_5_2=SCAFFOLD_435=GI_5_3=SCAFFOLD_2402=SCAFFOLD_2024=GI_5_4	10142438	+	N	C	N	C	C	C	C	N	C	C	C	N	C	N	N	C	C	N	C	T	C	T	T	C	C	T	N	C	N	T	C	Y	N	C	T	C	T	C	T	C	C
8046	8046	M8046	SCSC-2_GI_5_1=S	C/T	3	CSC-2_GI_5_1=SCAFFOLD_408=GI_5_2=SCAFFOLD_435=GI_5_3=SCAFFOLD_2402=SCAFFOLD_2024=GI_5_4	10169492	+	N	C	N	C	C	C	C	N	C	C	C	N	C	N	N	C	C	N	C	T	C	T	T	C	C	T	N	C	N	T	C	Y	N	C	T	C	T	C	T	C	C
8047	8047	M8047	SCSC-2_GI_5_1=S	C/T	3	CSC-2_GI_5_1=SCAFFOLD_408=GI_5_2=SCAFFOLD_435=GI_5_3=SCAFFOLD_2402=SCAFFOLD_2024=GI_5_4	10169585	+	N	C	N	C	C	C	C	N	C	C	C	N	C	N	N	C	C	N	C	T	C	T	T	C	N	T	N	C	N	T	C	Y	N	C	T	C	T	C	T	C	C
8048	8048	M8048	SCSC-2_GI_5_1=S	C/T	3	CSC-2_GI_5_1=SCAFFOLD_408=GI_5_2=SCAFFOLD_435=GI_5_3=SCAFFOLD_2402=SCAFFOLD_2024=GI_5_4	10173009	+	N	C	N	C	C	C	C	N	C	C	C	N	C	N	N	C	C	N	C	T	C	T	T	C	C	T	N	C	N	T	C	Y	T	C	T	C	T	C	T	C	C
8049	8049	M8049	SCSC-2_GI_5_1=S	G/A	3	CSC-2_GI_5_1=SCAFFOLD_408=GI_5_2=SCAFFOLD_435=GI_5_3=SCAFFOLD_2402=SCAFFOLD_2024=GI_5_4	10176568	+	N	G	N	G	G	G	G	N	G	G	G	N	G	N	N	G	G	N	G	A	G	A	A	G	N	A	N	G	N	A	G	R	N	G	A	G	A	G	A	G	G
8052	8052	M8052	SCSC-2_GI_5_1=S	C/T	3	CSC-2_GI_5_1=SCAFFOLD_408=GI_5_2=SCAFFOLD_435=GI_5_3=SCAFFOLD_2402=SCAFFOLD_2024=GI_5_4	10284330	+	N	C	N	C	C	C	C	N	C	C	C	N	C	N	N	C	C	N	C	T	C	T	T	C	C	T	N	C	N	T	C	Y	N	C	T	C	T	C	T	C	C
8053	8053	M8053	SCSC-2_GI_5_1=S	C/A	3	CSC-2_GI_5_1=SCAFFOLD_408=GI_5_2=SCAFFOLD_435=GI_5_3=SCAFFOLD_2402=SCAFFOLD_2024=GI_5_4	10333858	+	N	C	N	C	C	C	C	N	C	C	C	N	C	N	N	C	C	N	C	A	C	A	A	C	N	A	N	C	N	A	C	M	N	C	A	C	A	C	A	C	C
8114	8114	M8114	SCSC-2_GI_5_1=S	T/C	3	CSC-2_GI_5_1=SCAFFOLD_408=GI_5_2=SCAFFOLD_435=GI_5_3=SCAFFOLD_2402=SCAFFOLD_2024=GI_5_4	10485290	+	N	T	N	T	T	T	T	N	T	T	T	N	T	N	N	T	T	N	T	C	T	C	C	T	T	C	N	T	N	C	T	Y	N	T	C	T	C	T	C	T	T
8115	8115	M8115	SCSC-2_GI_5_1=S	G/A	3	CSC-2_GI_5_1=SCAFFOLD_408=GI_5_2=SCAFFOLD_435=GI_5_3=SCAFFOLD_2402=SCAFFOLD_2024=GI_5_4	10576289	+	N	G	N	G	G	G	G	N	G	G	G	N	G	N	N	G	G	N	G	A	G	A	A	G	G	A	N	G	N	A	G	R	N	G	A	G	A	G	A	G	G
8116	8116	M8116	SCSC-2_GI_5_1=S	T/C	3	CSC-2_GI_5_1=SCAFFOLD_408=GI_5_2=SCAFFOLD_435=GI_5_3=SCAFFOLD_2402=SCAFFOLD_2024=GI_5_4	10637462	+	N	T	N	T	T	T	T	N	T	T	T	N	T	N	N	T	T	N	T	C	T	C	C	T	N	C	N	T	N	C	T	Y	N	T	C	T	C	T	C	T	T
8117	8117	M8117	SCSC-2_GI_5_1=S	T/C	3	CSC-2_GI_5_1=SCAFFOLD_408=GI_5_2=SCAFFOLD_435=GI_5_3=SCAFFOLD_2402=SCAFFOLD_2024=GI_5_4	10637719	+	N	T	N	T	T	T	T	N	T	T	T	N	T	C	N	T	T	N	T	C	T	C	C	T	T	C	N	T	N	C	T	Y	N	T	C	T	C	T	C	T	T
8120	8120	M8120	SCSC-2_GI_5_1=S	G/C	3	CSC-2_GI_5_1=SCAFFOLD_408=GI_5_2=SCAFFOLD_435=GI_5_3=SCAFFOLD_2402=SCAFFOLD_2024=GI_5_4	10642463	+	N	G	N	G	G	G	G	N	G	G	G	N	G	N	N	G	G	N	G	C	G	C	C	G	G	C	N	G	N	C	G	S	N	G	C	G	C	G	C	G	G
8125	8125	M8125	SCSC-2_GI_5_1=S	C/A	3	CSC-2_GI_5_1=SCAFFOLD_408=GI_5_2=SCAFFOLD_435=GI_5_3=SCAFFOLD_2402=SCAFFOLD_2024=GI_5_4	11025342	+	N	C	N	C	C	C	C	N	C	C	C	N	C	N	N	C	C	N	C	A	C	A	A	C	N	A	N	C	N	A	C	M	N	C	A	C	A	C	A	C	C
8141	8141	M8141	SCSC-2_GI_5_1=S	T/C	3	CSC-2_GI_5_1=SCAFFOLD_408=GI_5_2=SCAFFOLD_435=GI_5_3=SCAFFOLD_2402=SCAFFOLD_2024=GI_5_4	11391667	+	N	T	N	T	T	T	T	N	T	T	T	N	T	N	N	T	T	N	T	C	T	C	C	T	N	C	N	T	N	C	T	Y	N	T	C	T	T	T	C	T	T
8142	8142	M8142	SCSC-2_GI_5_1=S	G/A	3	CSC-2_GI_5_1=SCAFFOLD_408=GI_5_2=SCAFFOLD_435=GI_5_3=SCAFFOLD_2402=SCAFFOLD_2024=GI_5_4	11523156	+	G	G	N	G	G	G	G	N	G	G	G	N	G	N	N	G	G	N	G	R	G	A	A	G	N	A	N	G	N	A	G	R	N	G	A	G	G	A	A	G	G
8143	8143	M8143	SCSC-2_GI_5_1=S	A/C	3	CSC-2_GI_5_1=SCAFFOLD_408=GI_5_2=SCAFFOLD_435=GI_5_3=SCAFFOLD_2402=SCAFFOLD_2024=GI_5_4	11523157	+	A	A	N	A	A	A	A	N	A	A	A	N	A	N	N	A	A	N	A	M	A	C	C	A	N	C	N	A	N	C	A	M	N	A	C	A	A	C	C	A	A
8144	8144	M8144	SCSC-2_GI_5_1=S	A/G	3	CSC-2_GI_5_1=SCAFFOLD_408=GI_5_2=SCAFFOLD_435=GI_5_3=SCAFFOLD_2402=SCAFFOLD_2024=GI_5_4	11529699	+	N	A	N	A	A	A	A	N	A	A	A	N	A	N	N	A	A	N	A	R	A	G	G	A	A	G	N	A	N	G	A	R	N	A	G	A	A	G	G	A	A
8151	8151	M8151	SCSC-2_GI_5_1=S	T/A	3	CSC-2_GI_5_1=SCAFFOLD_408=GI_5_2=SCAFFOLD_435=GI_5_3=SCAFFOLD_2402=SCAFFOLD_2024=GI_5_4	11769047	+	N	T	N	T	T	T	T	N	T	T	T	N	T	N	N	T	T	N	T	W	T	A	A	T	T	A	N	T	N	A	T	T	N	T	A	A	T	A	T	T	T
8153	8153	M8153	SCSC-2_GI_5_1=S	C/T	3	CSC-2_GI_5_1=SCAFFOLD_408=GI_5_2=SCAFFOLD_435=GI_5_3=SCAFFOLD_2402=SCAFFOLD_2024=GI_5_4	11834058	+	N	C	N	C	C	C	C	N	C	C	C	N	C	N	N	C	C	N	C	C	C	T	T	C	C	T	N	C	N	T	C	C	N	C	T	T	C	T	C	C	C
8160	8160	M8160	SCSC-2_GI_5_1=S	A/G	3	CSC-2_GI_5_1=SCAFFOLD_408=GI_5_2=SCAFFOLD_435=GI_5_3=SCAFFOLD_2402=SCAFFOLD_2024=GI_5_4	12243876	+	N	A	G	A	A	A	A	N	A	A	A	N	A	N	N	A	A	N	A	A	A	G	G	A	A	G	N	A	N	G	A	G	N	G	G	G	G	G	A	A	A
8161	8161	M8161	SCSC-2_GI_5_1=S	A/G	3	CSC-2_GI_5_1=SCAFFOLD_408=GI_5_2=SCAFFOLD_435=GI_5_3=SCAFFOLD_2402=SCAFFOLD_2024=GI_5_4	12245221	+	A	G	N	G	G	G	G	N	G	G	G	N	G	N	N	G	G	N	G	G	G	A	A	G	G	A	N	G	N	A	G	A	N	A	A	A	A	A	G	G	G
8162	8162	M8162	SCSC-2_GI_5_1=S	A/C	3	CSC-2_GI_5_1=SCAFFOLD_408=GI_5_2=SCAFFOLD_435=GI_5_3=SCAFFOLD_2402=SCAFFOLD_2024=GI_5_4	12313975	+	N	C	N	C	C	C	C	N	C	C	C	N	C	N	N	C	C	N	C	C	C	A	A	C	C	A	N	C	N	A	C	A	N	A	A	A	A	A	C	C	C
8163	8163	M8163	SCSC-2_GI_5_1=S	A/T	3	CSC-2_GI_5_1=SCAFFOLD_408=GI_5_2=SCAFFOLD_435=GI_5_3=SCAFFOLD_2402=SCAFFOLD_2024=GI_5_4	12469638	+	N	T	N	T	T	T	T	N	T	T	T	N	T	N	N	T	T	N	T	T	T	A	A	T	T	A	N	T	N	A	T	A	A	A	A	A	A	A	T	T	T
8164	8164	M8164	SCSC-2_GI_5_1=S	T/A	3	CSC-2_GI_5_1=SCAFFOLD_408=GI_5_2=SCAFFOLD_435=GI_5_3=SCAFFOLD_2402=SCAFFOLD_2024=GI_5_4	12663814	+	N	T	N	A	A	A	A	N	A	T	A	N	A	N	N	A	A	N	A	A	A	T	T	A	A	T	N	A	N	A	A	T	N	T	T	T	T	T	A	A	A
8165	8165	M8165	SCSC-2_GI_5_1=S	G/T	3	CSC-2_GI_5_1=SCAFFOLD_408=GI_5_2=SCAFFOLD_435=GI_5_3=SCAFFOLD_2402=SCAFFOLD_2024=GI_5_4	12688597	+	N	G	N	T	T	T	T	N	T	G	T	N	T	N	N	T	T	N	T	T	T	G	G	T	T	G	N	T	N	T	T	G	N	G	G	G	G	G	T	T	T
8169	8169	M8169	SCSC-2_GI_5_1=S	C/A	3	CSC-2_GI_5_1=SCAFFOLD_408=GI_5_2=SCAFFOLD_435=GI_5_3=SCAFFOLD_2402=SCAFFOLD_2024=GI_5_4	12829194	+	N	C	N	A	A	A	A	N	A	C	A	N	A	N	N	A	A	N	A	A	A	C	C	A	A	C	N	A	N	A	A	C	N	C	C	C	C	C	A	A	A
8170	8170	M8170	SCSC-2_GI_5_1=S	C/T	3	CSC-2_GI_5_1=SCAFFOLD_408=GI_5_2=SCAFFOLD_435=GI_5_3=SCAFFOLD_2402=SCAFFOLD_2024=GI_5_4	12851730	+	N	T	N	C	C	C	C	N	C	T	C	N	C	N	N	C	C	N	C	C	C	T	T	C	C	T	N	C	N	C	C	T	N	T	T	T	T	T	C	C	C
8171	8171	M8171	SCSC-2_GI_5_1=S	C/T	3	CSC-2_GI_5_1=SCAFFOLD_408=GI_5_2=SCAFFOLD_435=GI_5_3=SCAFFOLD_2402=SCAFFOLD_2024=GI_5_4	12880773	+	N	C	N	T	T	T	T	N	T	C	T	N	T	N	N	T	T	N	T	T	T	C	C	T	T	C	N	T	N	T	T	C	N	C	C	C	C	C	T	T	T
8172	8172	M8172	SCSC-2_GI_5_1=S	C/T	3	CSC-2_GI_5_1=SCAFFOLD_408=GI_5_2=SCAFFOLD_435=GI_5_3=SCAFFOLD_2402=SCAFFOLD_2024=GI_5_4	13351245	+	N	C	N	T	T	T	T	N	T	C	T	N	Y	N	N	T	T	N	T	T	T	C	C	C	N	Y	N	T	N	T	T	C	N	C	C	C	C	C	C	T	T
8173	8173	M8173	SCSC-2_GI_5_1=S	A/G	3	CSC-2_GI_5_1=SCAFFOLD_408=GI_5_2=SCAFFOLD_435=GI_5_3=SCAFFOLD_2402=SCAFFOLD_2024=GI_5_4	13451961	+	N	A	N	G	G	G	G	N	G	A	G	N	A	N	N	G	G	N	G	G	G	A	A	A	G	R	N	G	N	G	G	A	N	A	A	A	A	A	A	G	G
8174	8174	M8174	SCSC-2_GI_5_1=S	T/C	3	CSC-2_GI_5_1=SCAFFOLD_408=GI_5_2=SCAFFOLD_435=GI_5_3=SCAFFOLD_2402=SCAFFOLD_2024=GI_5_4	13499387	+	C	T	N	C	C	C	C	N	C	T	C	N	C	T	N	T	C	N	C	C	C	T	T	T	T	C	N	C	N	C	C	T	T	T	T	T	T	T	T	C	C
8175	8175	M8175	SCSC-2_GI_5_1=S	T/C	3	CSC-2_GI_5_1=SCAFFOLD_408=GI_5_2=SCAFFOLD_435=GI_5_3=SCAFFOLD_2402=SCAFFOLD_2024=GI_5_4	13556267	+	N	T	N	C	C	C	C	N	C	T	C	N	C	N	N	T	N	N	C	C	C	T	T	T	N	C	N	C	N	C	C	T	N	T	T	T	T	T	T	C	C
8176	8176	M8176	SCSC-2_GI_5_1=S	A/G	3	CSC-2_GI_5_1=SCAFFOLD_408=GI_5_2=SCAFFOLD_435=GI_5_3=SCAFFOLD_2402=SCAFFOLD_2024=GI_5_4	13635273	+	N	G	A	G	G	G	G	N	G	A	G	N	G	N	N	A	G	N	G	G	G	A	A	A	A	G	N	G	N	G	G	A	N	A	A	A	A	A	A	G	G
8177	8177	M8177	SCSC-2_GI_5_1=S	G/A	3	CSC-2_GI_5_1=SCAFFOLD_408=GI_5_2=SCAFFOLD_435=GI_5_3=SCAFFOLD_2402=SCAFFOLD_2024=GI_5_4	13635278	+	N	A	G	A	A	A	A	N	A	G	A	N	A	N	N	G	A	N	A	A	A	G	G	G	G	A	N	A	N	A	A	G	N	G	G	G	G	G	G	A	A
8178	8178	M8178	SCSC-2_GI_5_1=S	A/T	3	CSC-2_GI_5_1=SCAFFOLD_408=GI_5_2=SCAFFOLD_435=GI_5_3=SCAFFOLD_2402=SCAFFOLD_2024=GI_5_4	13635745	+	N	T	N	T	T	T	T	N	T	A	T	N	T	N	N	A	T	N	T	T	T	A	A	A	N	T	N	T	N	T	T	A	N	A	A	A	A	A	A	T	T
8179	8179	M8179	SCSC-2_GI_5_1=S	C/T	3	CSC-2_GI_5_1=SCAFFOLD_408=GI_5_2=SCAFFOLD_435=GI_5_3=SCAFFOLD_2402=SCAFFOLD_2024=GI_5_4	13635759	+	N	T	N	T	T	T	T	N	T	C	T	N	T	N	N	C	T	N	T	T	T	C	C	C	N	T	N	T	N	T	T	C	N	C	C	C	C	C	C	T	T
8180	8180	M8180	SCSC-2_GI_5_1=S	G/A	3	CSC-2_GI_5_1=SCAFFOLD_408=GI_5_2=SCAFFOLD_435=GI_5_3=SCAFFOLD_2402=SCAFFOLD_2024=GI_5_4	13635784	+	N	A	N	A	A	A	A	N	A	G	A	N	A	N	N	G	A	N	A	A	A	G	G	G	N	A	N	A	N	A	A	G	N	G	G	G	G	G	G	A	A
8181	8181	M8181	SCSC-2_GI_5_1=S	T/C	3	CSC-2_GI_5_1=SCAFFOLD_408=GI_5_2=SCAFFOLD_435=GI_5_3=SCAFFOLD_2402=SCAFFOLD_2024=GI_5_4	13635803	+	N	C	N	C	C	C	C	N	C	T	C	N	C	N	N	T	C	N	C	C	C	T	T	T	N	C	N	C	N	C	C	T	N	T	T	T	T	T	T	C	C
8182	8182	M8182	SCSC-2_GI_5_1=S	G/A	3	CSC-2_GI_5_1=SCAFFOLD_408=GI_5_2=SCAFFOLD_435=GI_5_3=SCAFFOLD_2402=SCAFFOLD_2024=GI_5_4	13635970	+	A	A	N	A	A	A	A	N	A	G	A	N	A	N	N	G	A	N	A	A	A	G	G	G	G	A	N	A	N	A	A	G	N	G	G	G	G	G	G	A	A
8183	8183	M8183	SCSC-2_GI_5_1=S	A/T	3	CSC-2_GI_5_1=SCAFFOLD_408=GI_5_2=SCAFFOLD_435=GI_5_3=SCAFFOLD_2402=SCAFFOLD_2024=GI_5_4	13653250	+	N	T	N	T	T	T	T	N	T	A	T	N	T	N	N	A	T	N	T	T	T	A	A	A	A	T	N	T	N	T	T	A	N	A	A	A	A	A	A	T	T
[truncated: 3,619 more rows]
[truncated: 163 more columns]
